# Supplementary material for: Biocatalytic stereocontrolled head-to-tail cyclizations as a tool for streamlined hybrid synthesis of terpenes
Source: Research Square preprint supplement (doi:10.21203/rs.3.rs-3207290/v1), 2023-09-18
Supplement: Supplementary file 1 [file 57e4f696c2e2393c8d7400d9.docx]

**Supplementary information for**

**Biocatalytic stereocontrolled head-to-tail cyclizations as a tool for streamlined hybrid synthesis of terpenes**

Andreas Schneider1, Thomas B. Lystbæk1, Daniel Markthaler2, Niels Hansen2 & Bernhard Hauer1*

1Institute of Biochemistry and Technical Biochemistry, University of Stuttgart, Stuttgart-Vaihingen, Germany

2Institute of Thermodynamics and Thermal Process Engineering, University of Stuttgart, Stuttgart-Vaihingen, Germany

This file contains:

Figure S1-18

Supporting Table S1-8

General materials

General analytics

General methods

Computational methods

Preparative scale biotransformations

Chemical synthesis

Supporting chromatograms

Supporting mass spectra

NMR spectra

Amino acid sequences

References

***Table of contents***

Figure S 1 5

Figure S 2 6

Figure S 3 7

Figure S 4 8

Figure S 5 9

Figure S 6 10

Figure S 7 11

Figure S 8 12

Figure S 9 13

Figure S 10 14

Figure S 11 15

Figure S 12 16

Figure S 13 17

Figure S 14 18

Figure S 15 19

Figure S 16 20

Figure S 17 21

Figure S 18 22

Supporting Table S 1 23

Supporting Table S 2 23

Supporting Table S 3 24

Supporting Table S 4 25

Supporting Table S 5 25

Supporting Table S 6 25

Supporting Table S 7 25

Supporting Table S 8 26

A. Materials 26

Chemicals 26

Molecular biological kits 27

B. General analytics 27

Nuclear Magnetic Resonance 27

Gas chromatography (GC) 27

Circular dichroism 27

C. General Methods 28

Plasmid isolation 28

Site-saturation/-directed mutagenesis 28

Plasmid transformation via heat-shock method 28

Expression of SHC in Erlenmeyer flasks 29

Expression of SHC libraries in 96-DW plates 29

Expression in 24 DW-plates 29

Thermolysis purification25,26 29

SDS-PAGE 30

Analytical biotransformations in GC screw-cap-vials 30

Screening of AacSHC libraries via GC-MS 30

Verification of promising hits 30

Determination of turnover frequency and total turnover in vivo 31

Fluorescence microscopy 31

D. Computational methods 31

Docking simulations 31

Free energy calculations 31

Molecular model 31

Simulation Details 32

Double Decoupling 33

E. Preparative scale biotransformations using lyophilized *E. coli* cells harboring the *Aac*SHC variants. 35

6 with G600R to cyclogeranyl acetate hydrate (7) 36

17 with variant G600M to trans-chromene (18) 36

Z-17 with variant G600M to cis-chromene (23) 36

13 with variant F601D F605L to sclareoloxide (14) 37

Z-17 with variant G600T L607A Y420F A306W D432T to γ-dihydroionone (24) 37

8 with variant A306W to drimane diol (9) 38

8 with variant Y420F G600L L36V to (+)-drimane diol (S1-9) 38

10 with variant G600N to labdane (12) 39

10 with variant F605W to ent-isocopalol (11) 39

15 with variant F601D F605L to sclareol oxide acetate (16) 40

F. Chemical synthesis 40

Synthesis of E,E-keto ester (15) 40

Synthesis of ketone (P-1) 41

Synthesis of ketone (P-2) 41

Synthesis of ketone (P-3) 42

Synthesis of trans-tetrahydroactinidiolide (1) via P-1 42

Synthesis of sclareolide (26) via Lipase/Iodine tandem protocol 43

Synthesis of cis-tetrahydroactinidiolide (25) via Lipase/Iodine tandem protocol 44

Synthesis of trans-tetrahydroactinidiolide (1) via Lipase/Iodine tandem protocol 44

Synthesis of chromanone (3) 44

Synthesis of carbonate (2) 45

Synthesis of α-pyrone meroterpenes (28) and (29) 46

Chlorosulfonic acid catalyzed cyclizations of terpenes as racemic standards 47

G. Supporting chromatograms 47

H. Supporting mass spectra 50

I. NMR spectra 54

J. Amino acid sequences 79

K. References 80

**
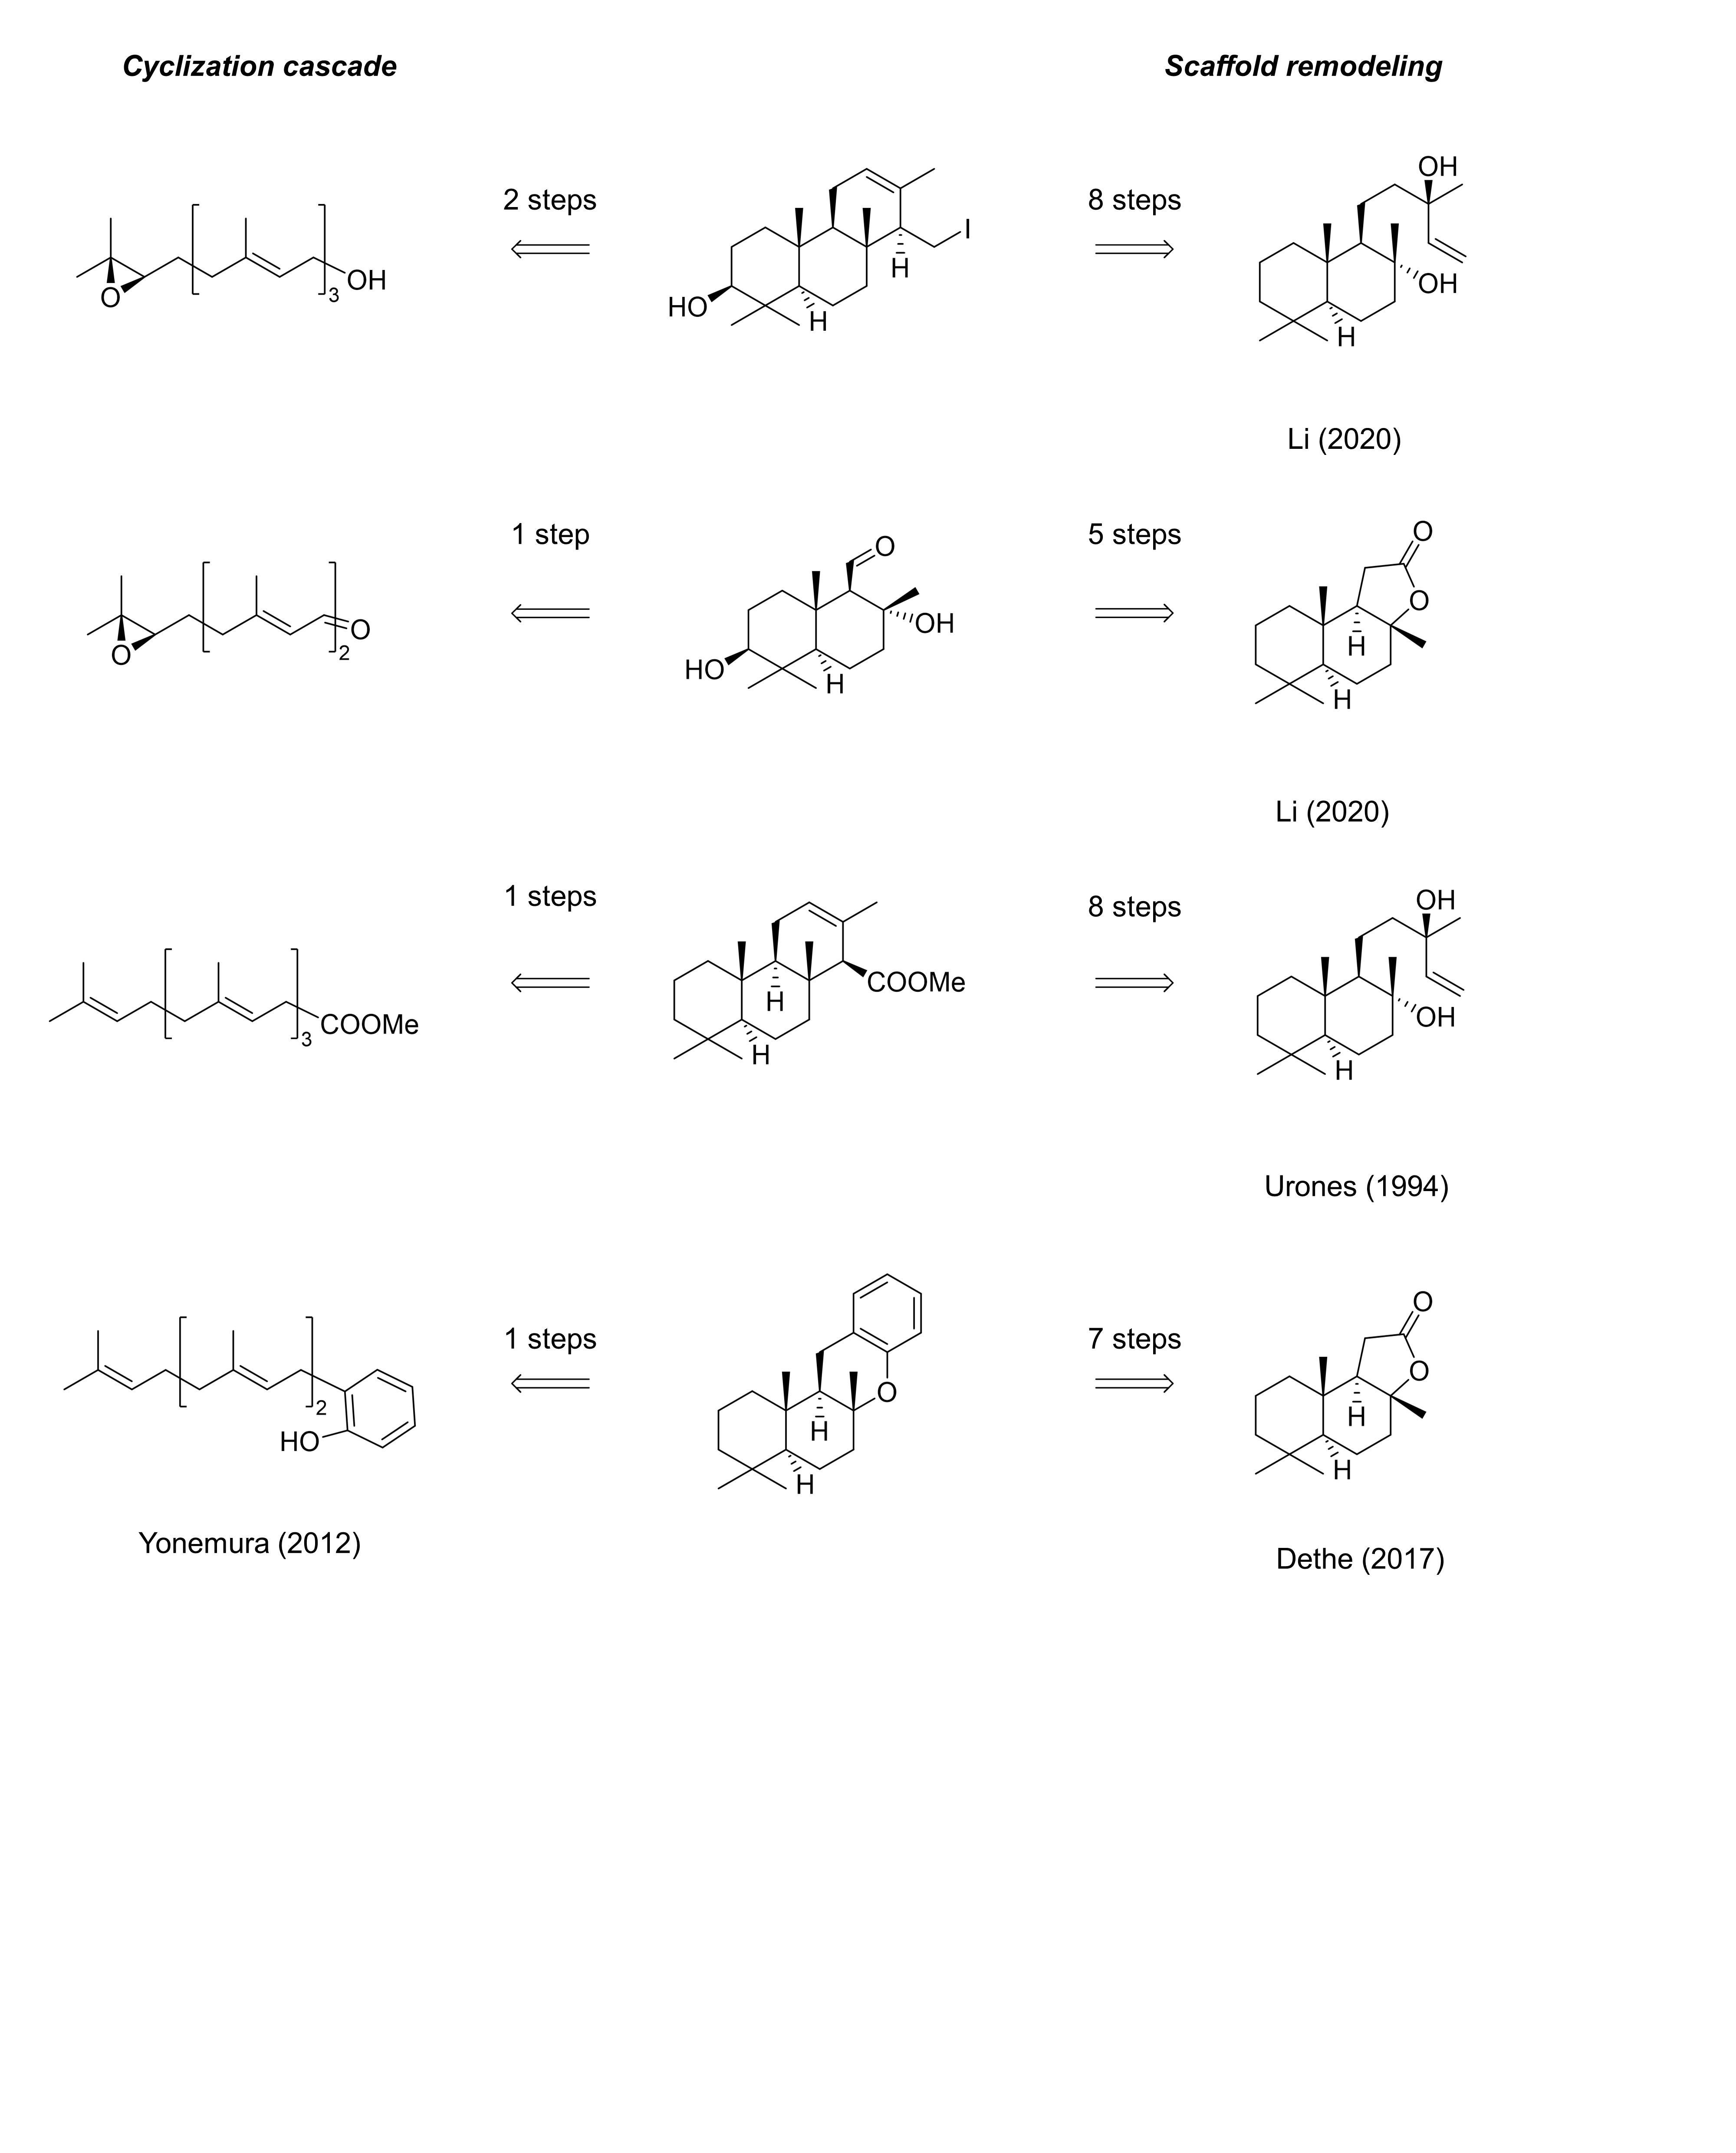
**

Figure S 1: Selected examples from the literature in which a scalable and stereocontrolled cationic cyclization cascade could shorten the synthetic pathway to cyclic terpenes via scaffold remodelling.1–4


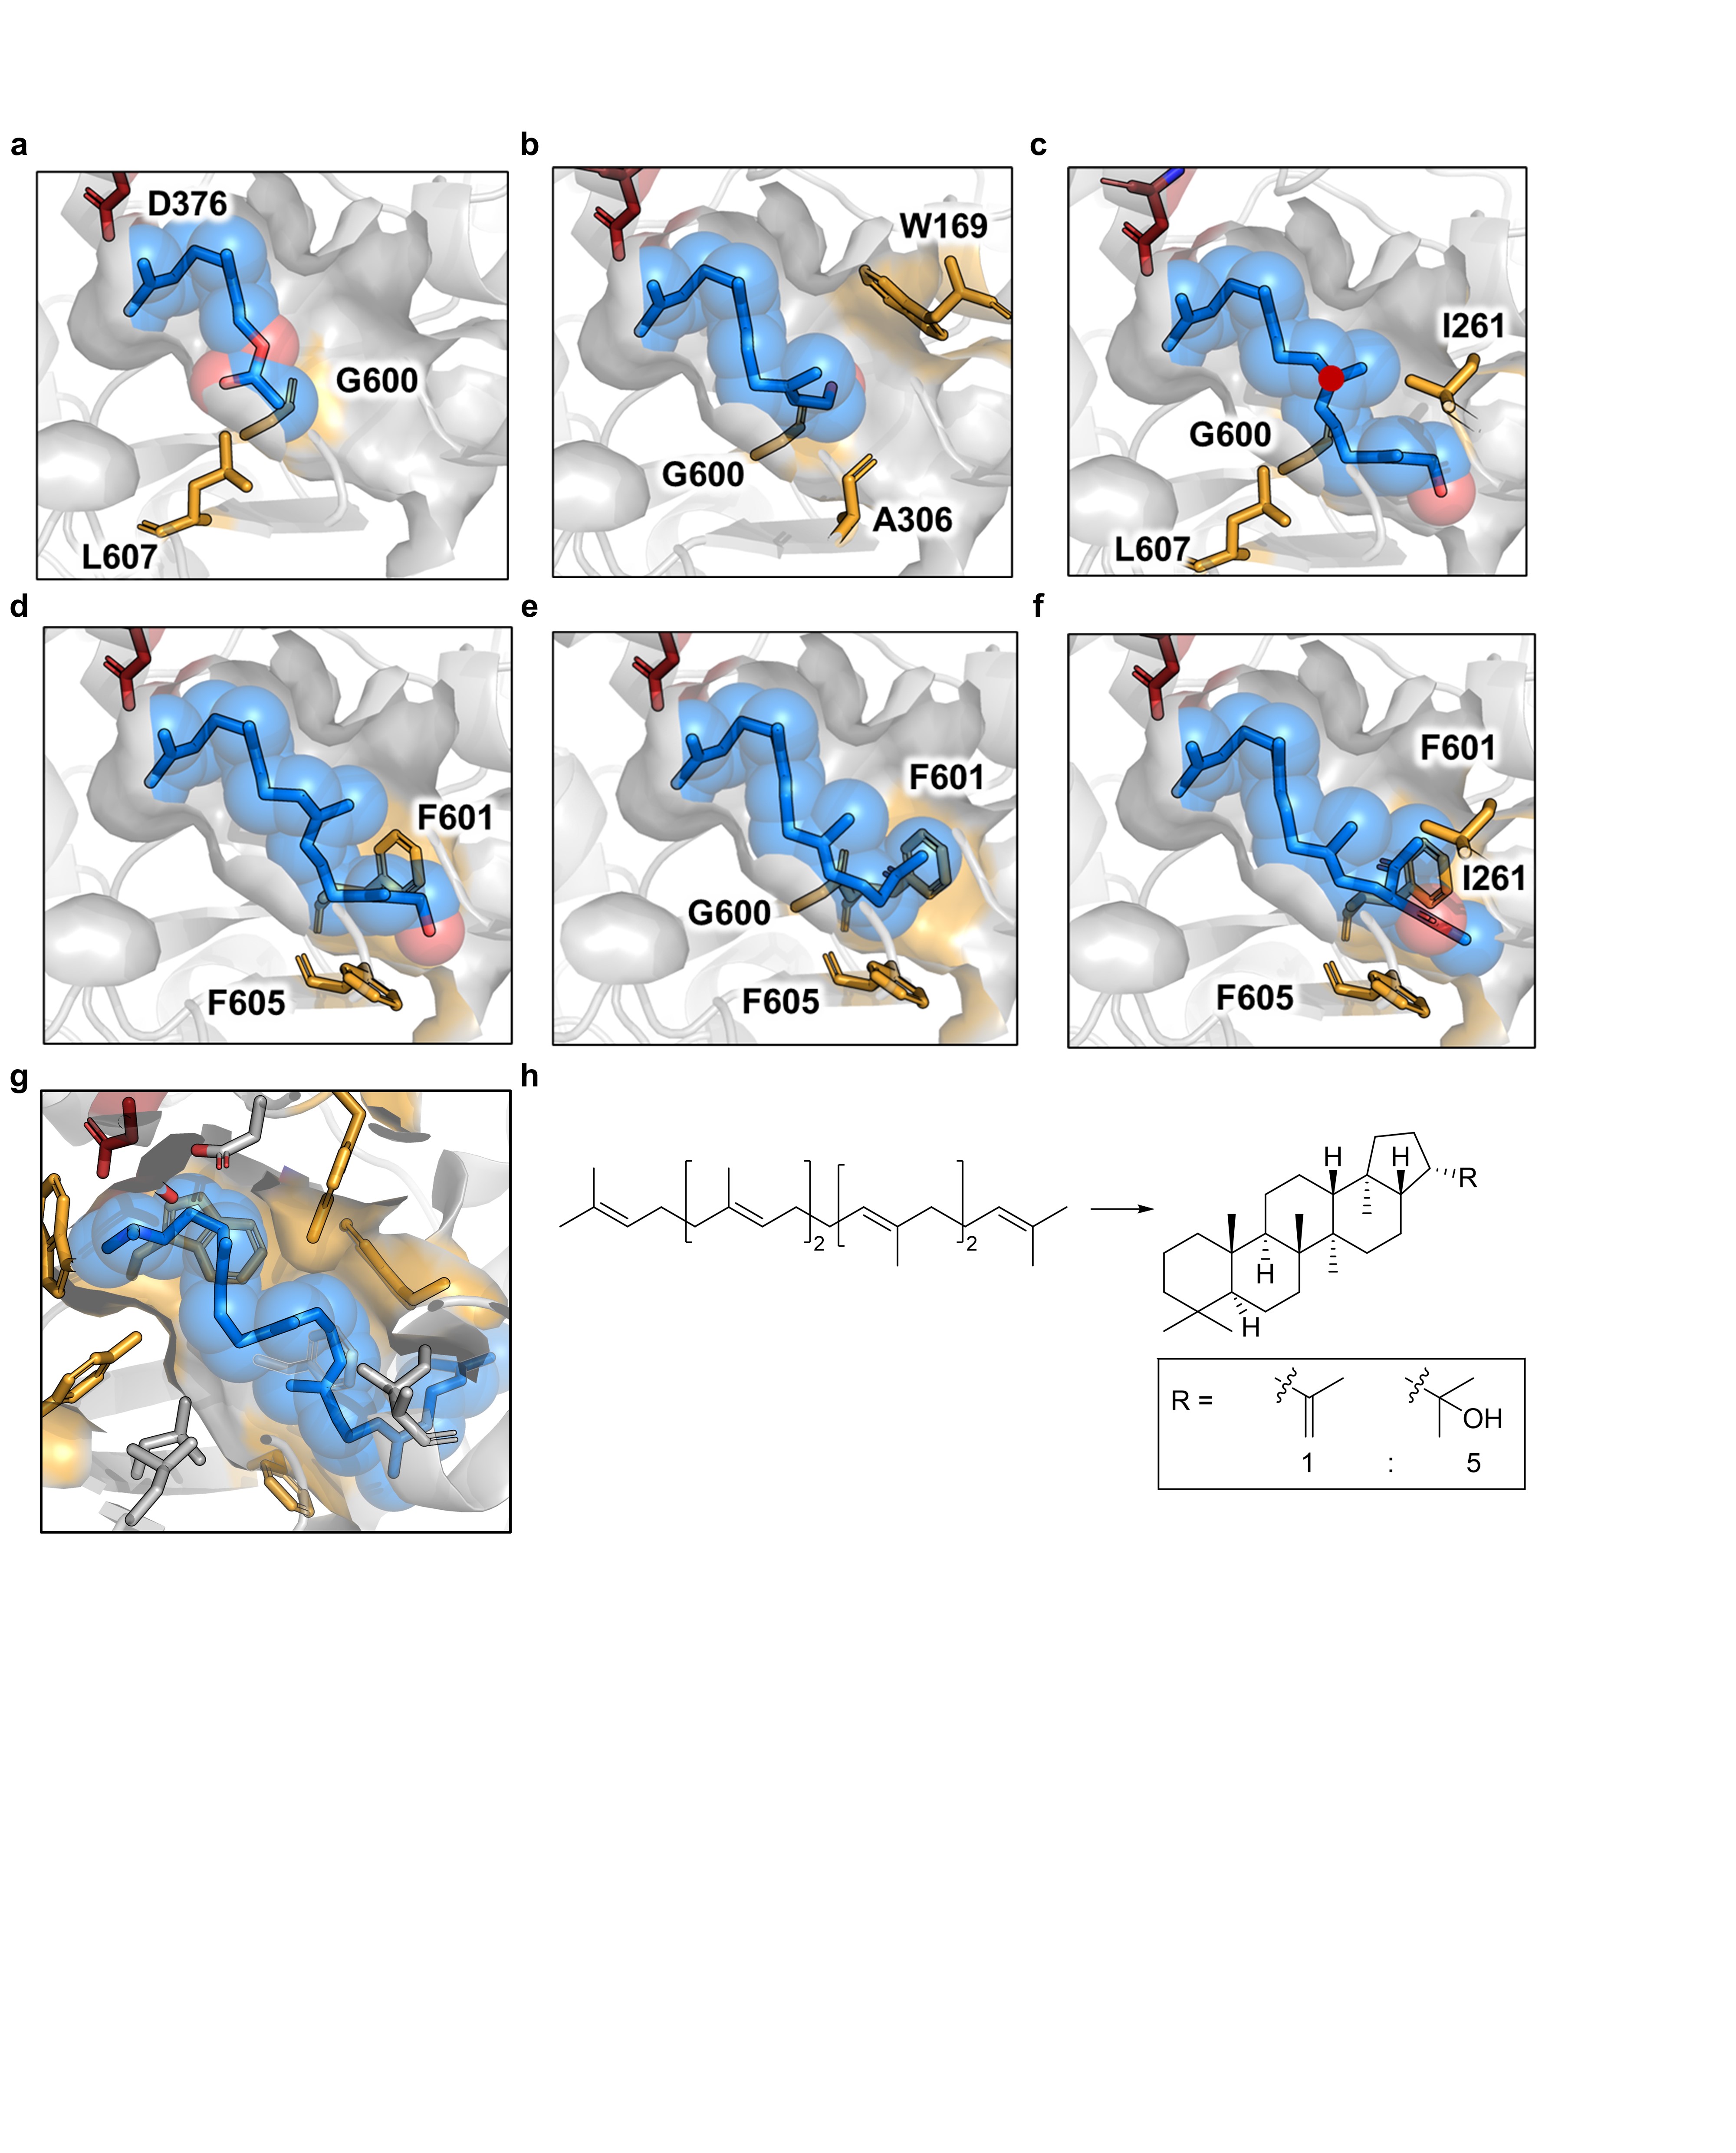


Figure S 2: Molecular docking of substrates (blue sticks and spheres) a) 6, b) 8, c+d) 10, e) 13 and f) 15 into the active site of AacSHC (PDB: 1UMP) using YASARA5 with AutoDock VINA. For comparison the crystal structure of the protein co-crystallized with aza-squalene is shown in g) and aromatic residues are highlighted in orange. Protonating aspartate is shown as red sticks. For a-f) the most proficient hit positions of the screening are shown as orange sticks. The docking shows similar productive pre-foldings tightly packed in the active site of AacSHC for all substrates, which suggests the same expected stereochemistry.

**
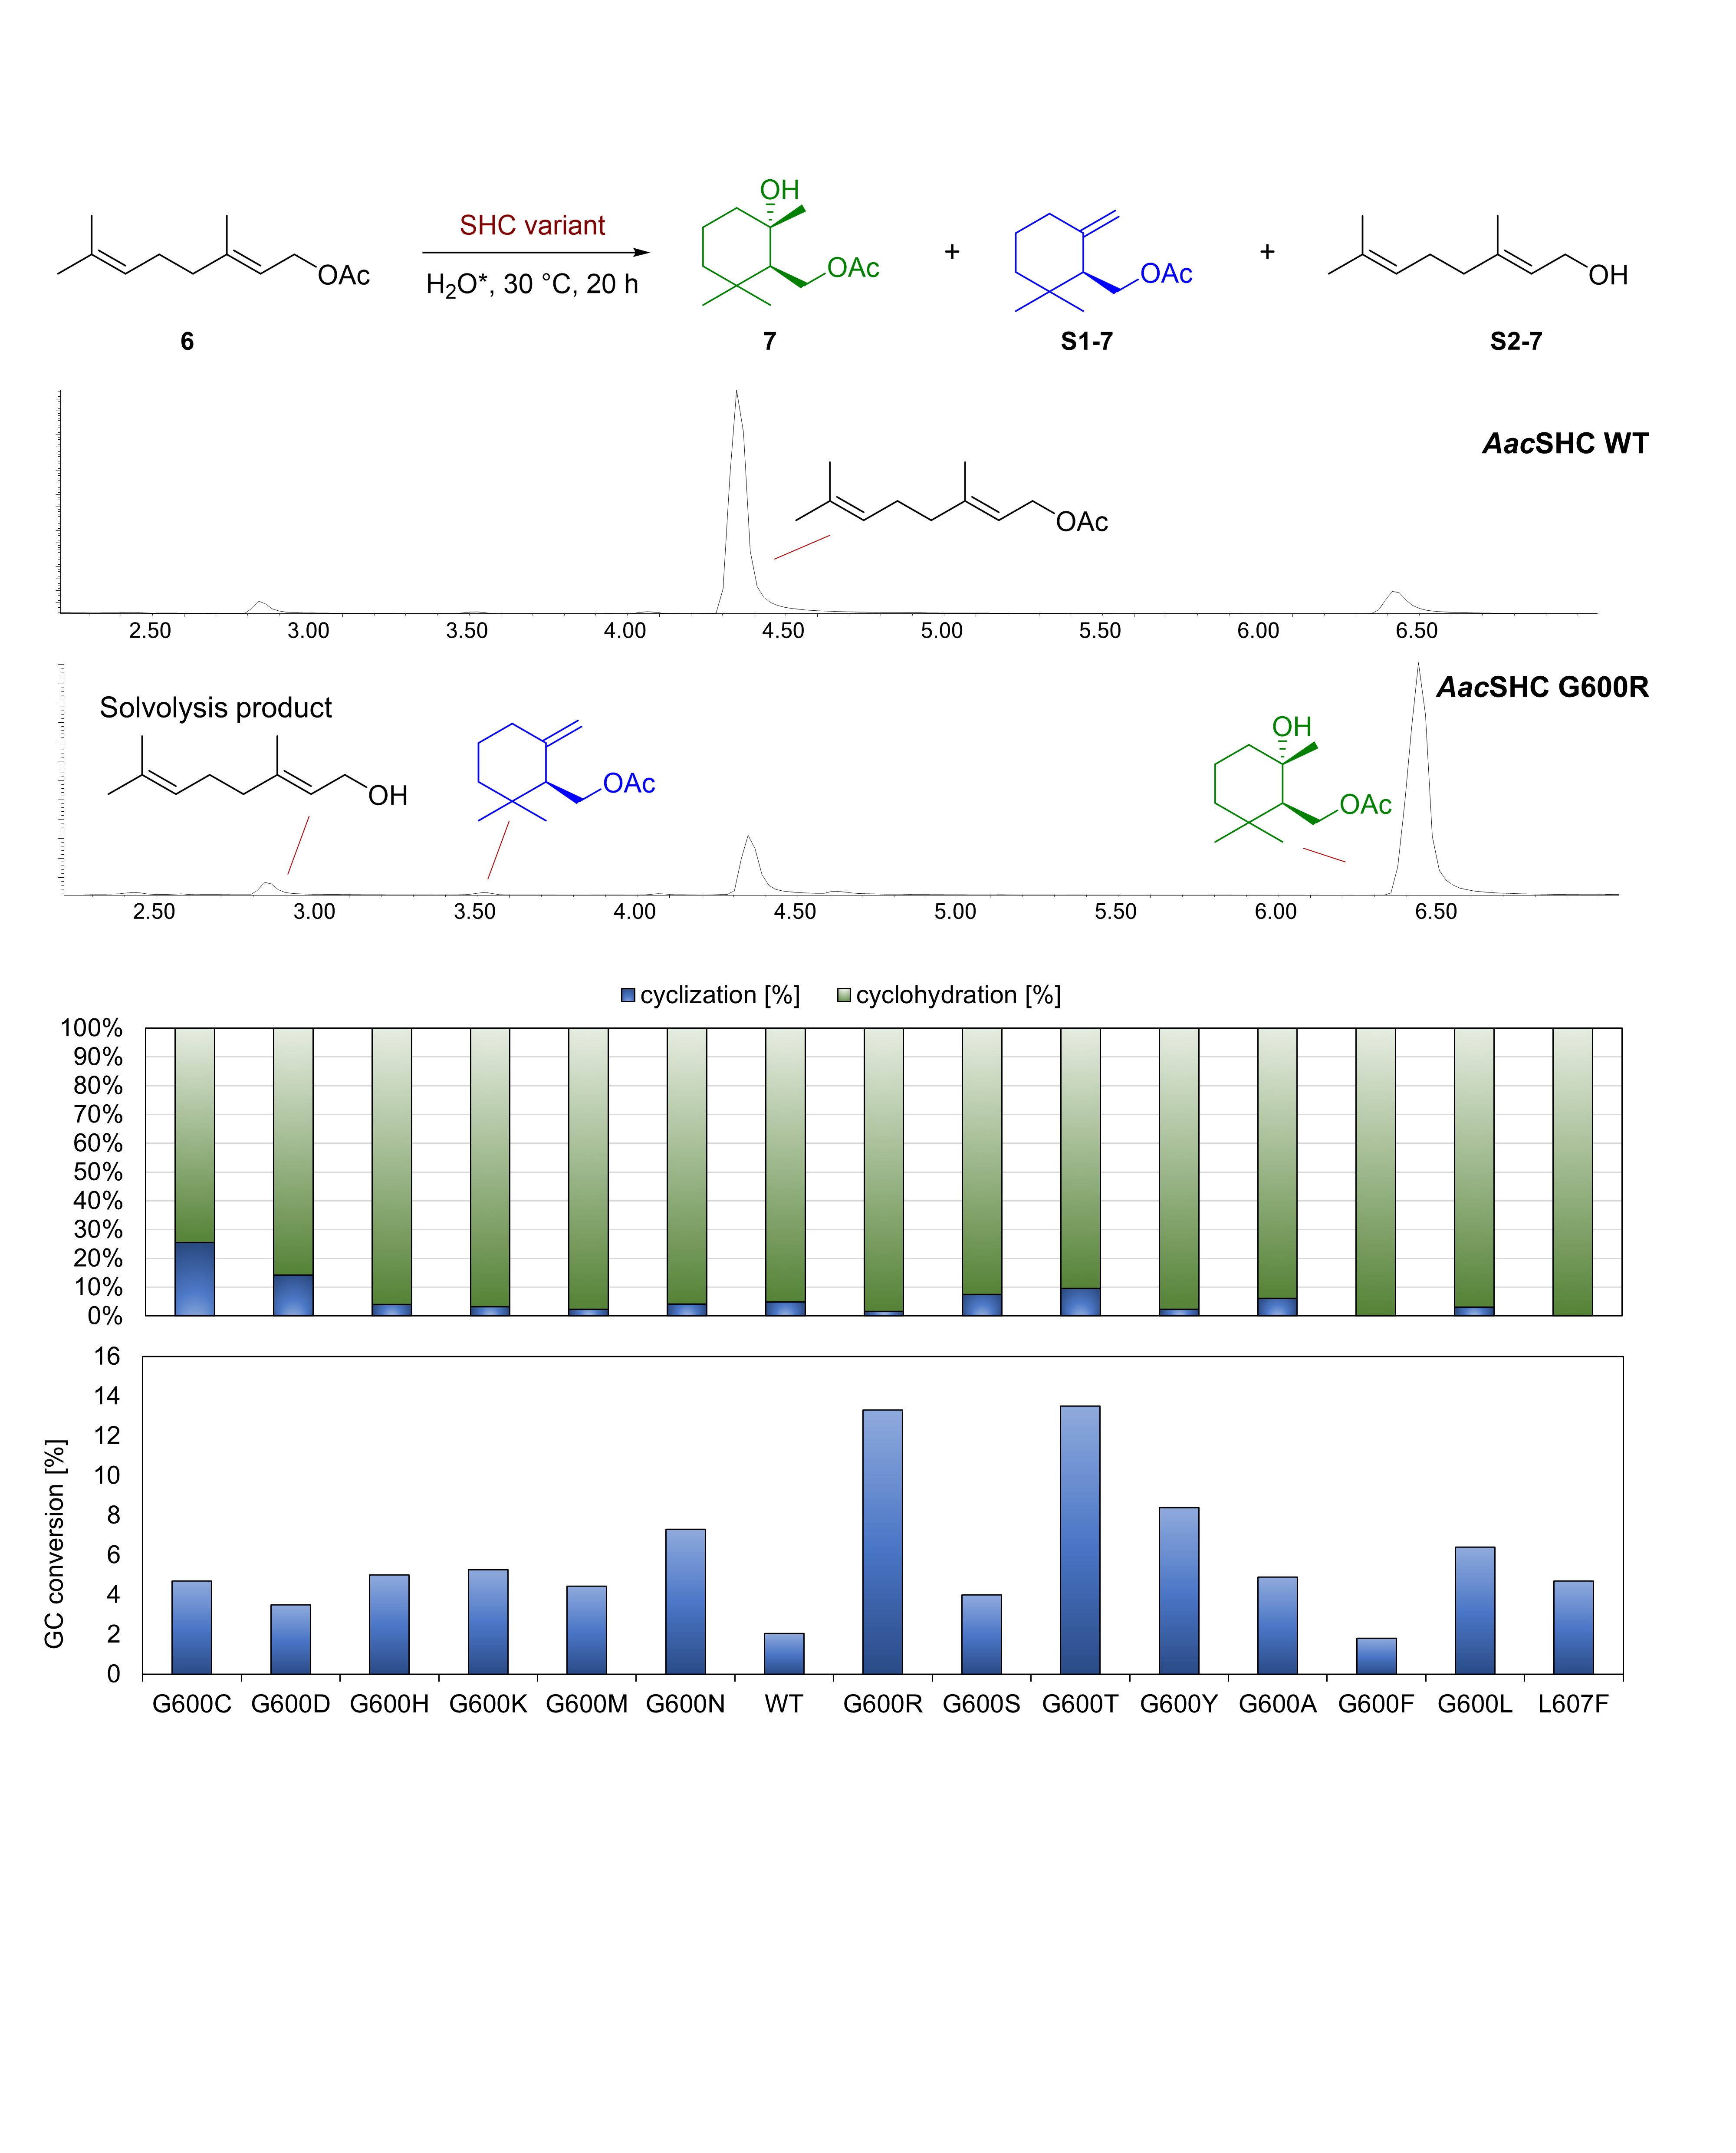
**

Figure S 3: Results of the internal SHC library screening for cyclization of E-geranyl acetate 6 to main product 7 and side products S1-7 and S2-7. Products were identified by NMR. Variants were plotted against their GC conversion (lower columns) and selectivity (upper columns). GC conversion and selectivity was determined as [Area_product]/[Area_substrate+Area_products]. Conditions: 1 mM substrate, E. coli cells expressing SHC variant, OD = 20, 30 °C, 20 h. Enzyme expression was controlled via SDS-PAGE. Best hits were then compared in analytical biotransformations in water.

**
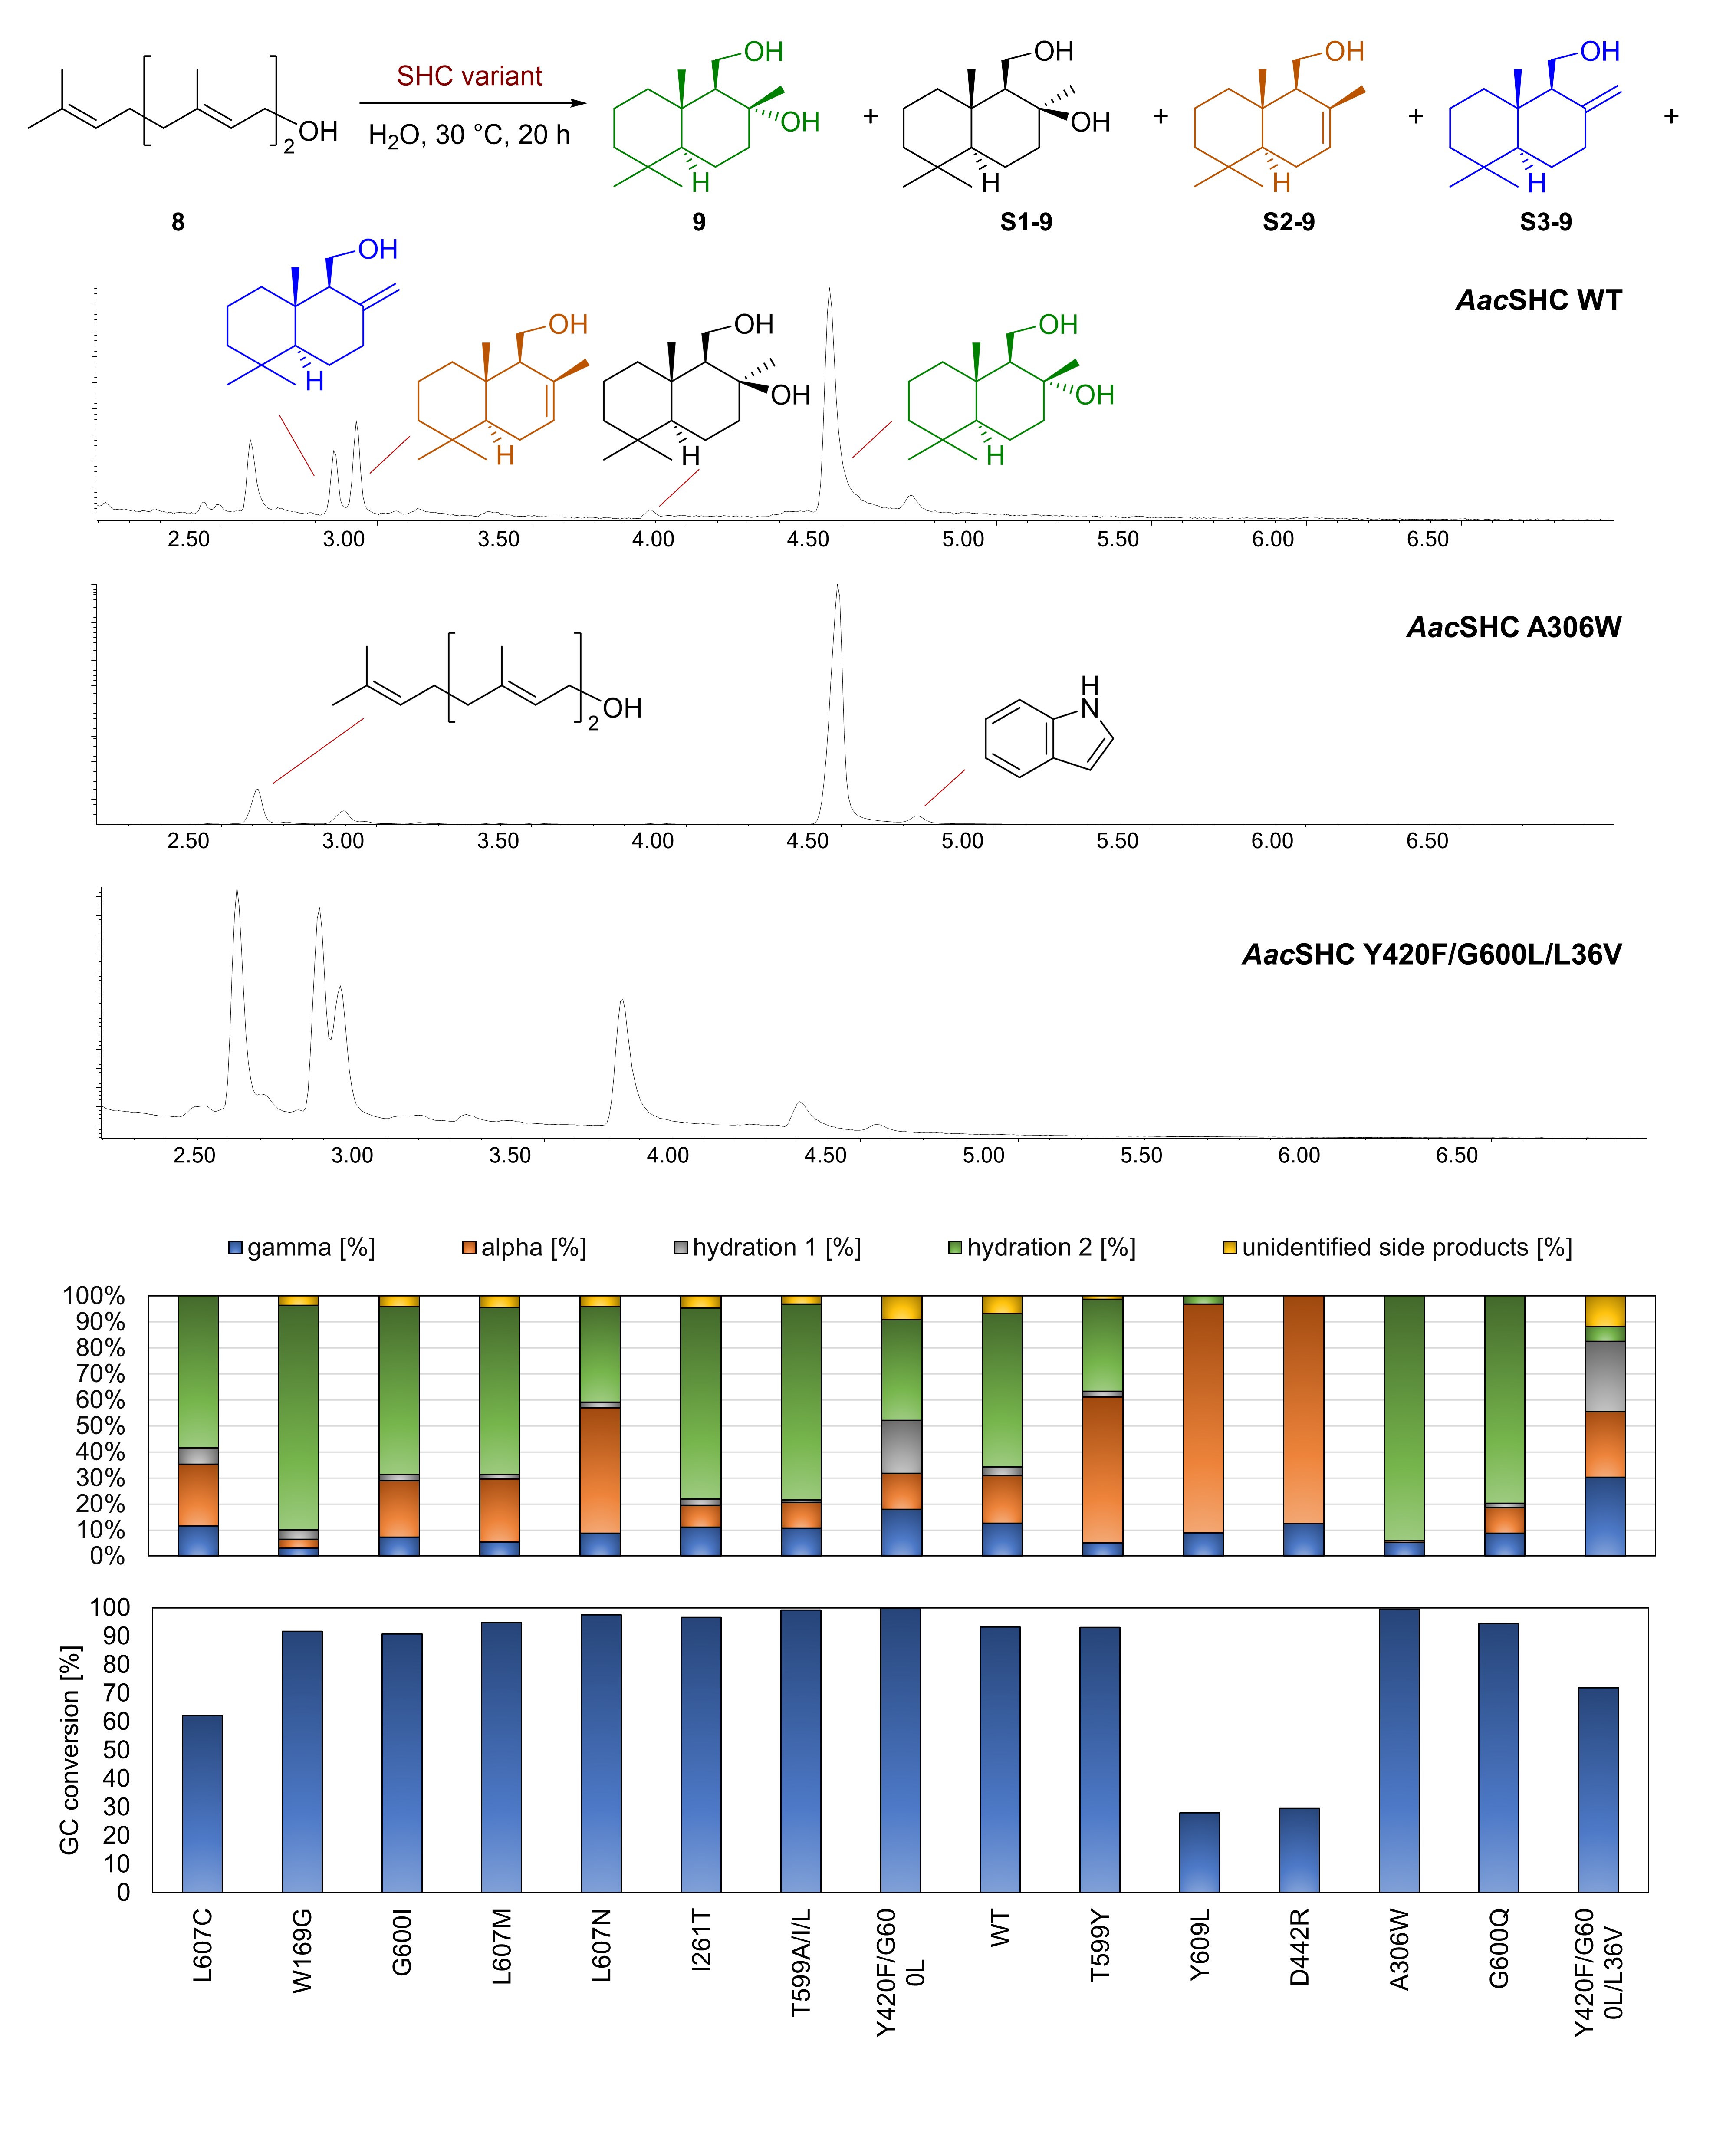
**

Figure S 4: Results of the internal SHC library screening for cyclization of E,E-farnesol 8 to desired cyclohydration product 9 and products S1-9, S2-9 and S3-9 among other unidentied side-products. Prodcuts were identified by NMR. Relative stereochemistry of S1-9 was determined by NOESY (see NMR section). Variants were plotted against their GC conversion (lower columns) and selectivity (upper columns). GC conversion and selectivity was determined as [Area_product]/[Area_substrate+Area_products]. Conditions: 1 mM substrate, E. coli cells expressing SHC variant, OD = 20, 50 °C, 20 h. Enzyme expression was controlled via SDS-PAGE. Best hits were then compared in analytical biotransformations in water.

**
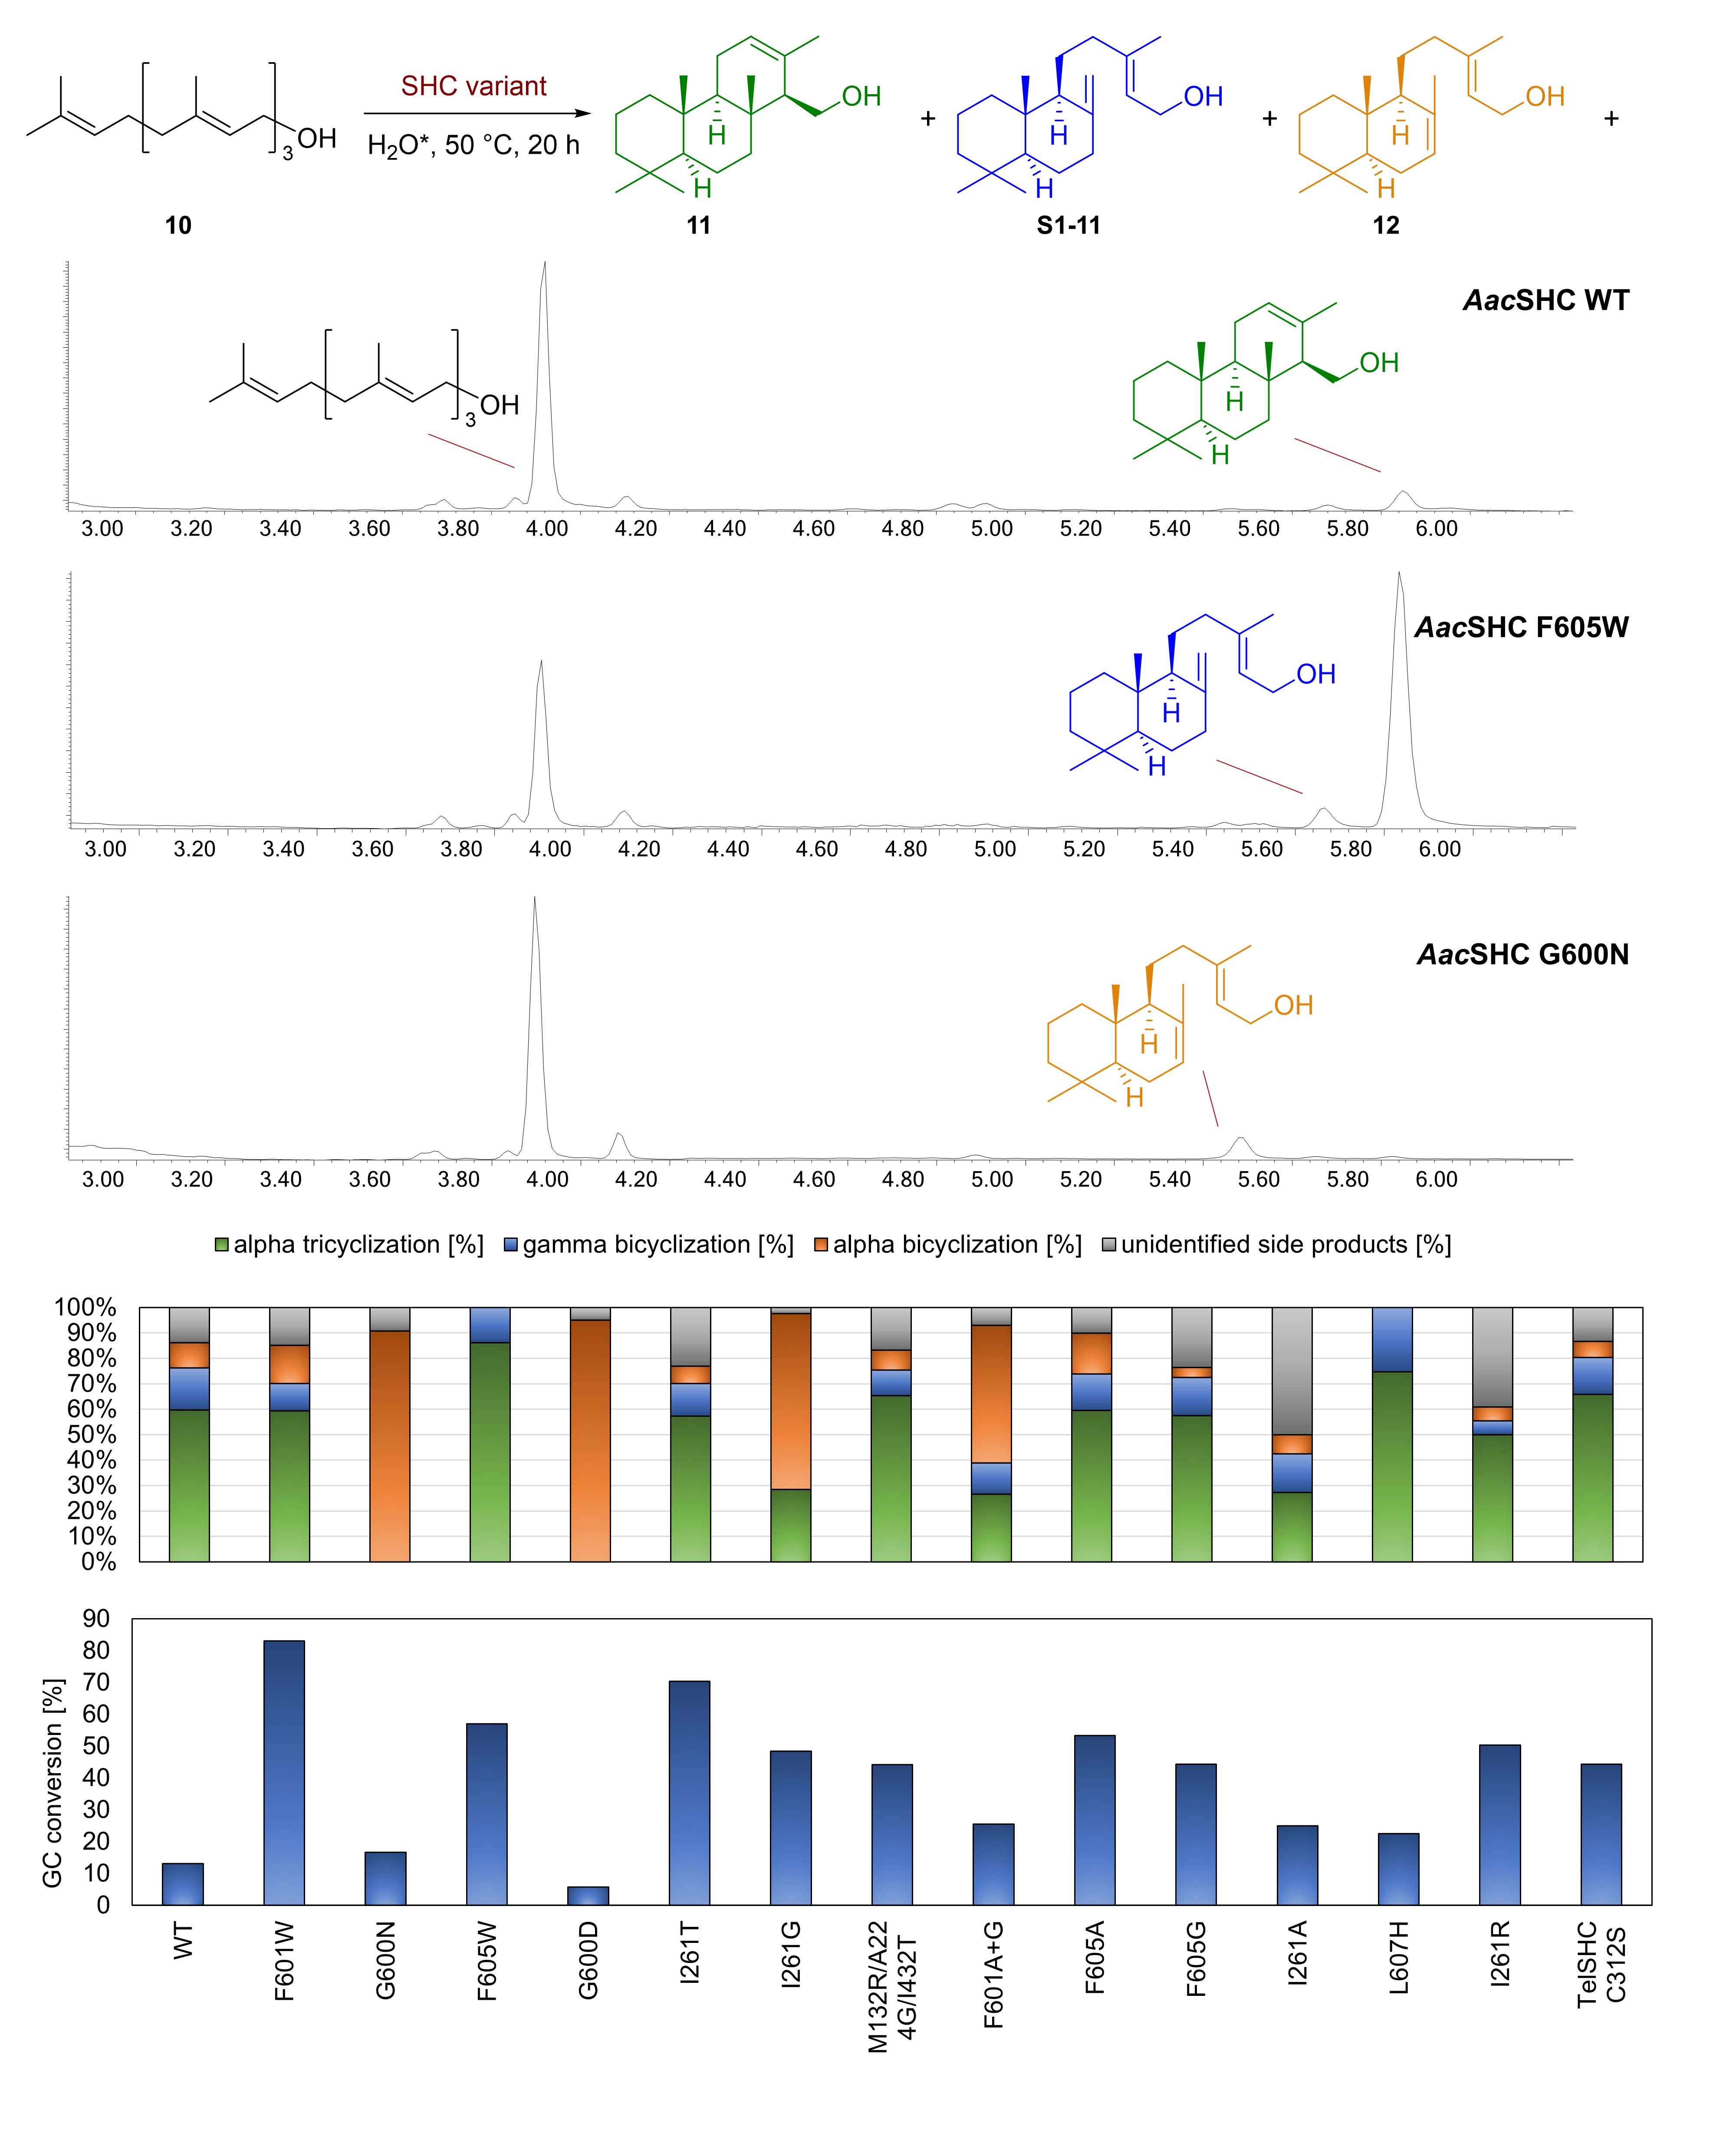
**

Figure S 5: Results of the internal SHC library screening for cyclization of E,E,E-geranyl geraniol 10to desired products 11, 12 and side product S-11among other unidentied side-products. Products were identifed by NMR. Variants were plotted against their GC conversion (lower columns) and selectivity (upper columns). GC conversion and selectivity was determined as [Area_product]/[Area_substrate+Area_products]. Conditions: 1 mM substrate, E. coli cells expressing SHC variant, OD = 20, 50 °C, 20 h. Enzyme expression was controlled via SDS-PAGE. Best hits were then compared in analytical biotransformations in water.


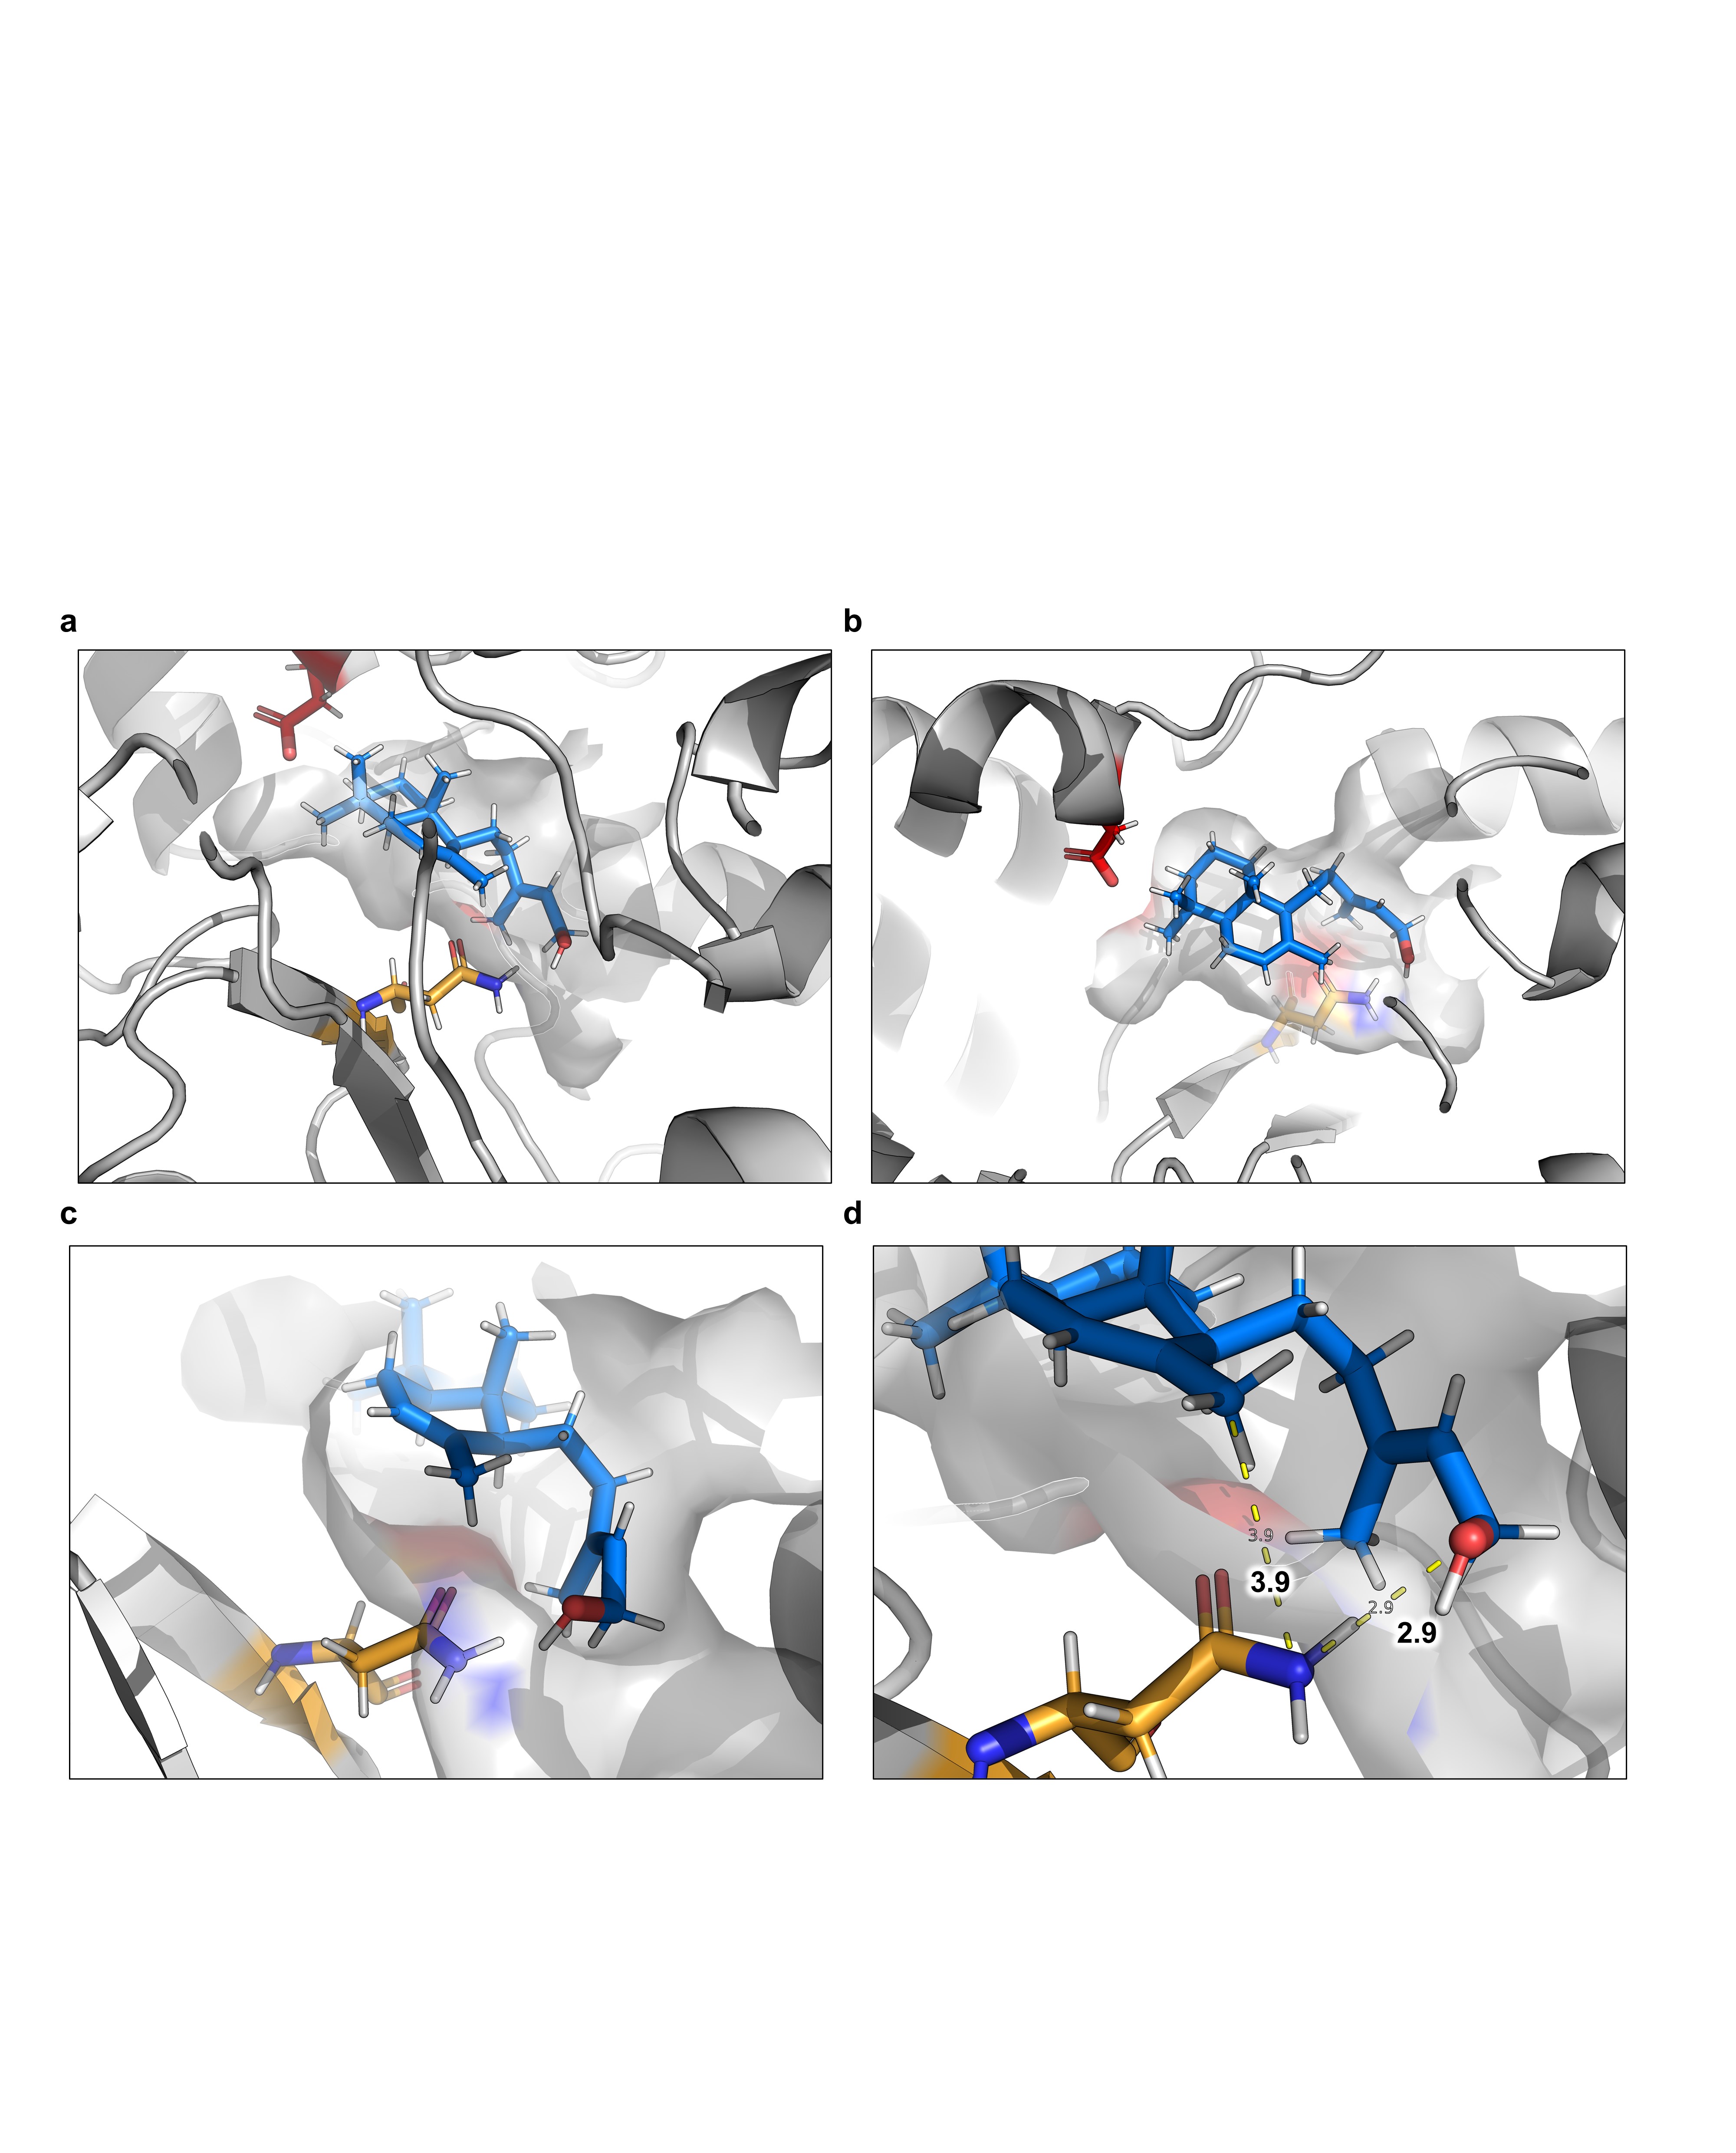


Figure S 6: Analysis of the docked labdane product (blue sticks) 12 into the active site of AacSHC G600N generated by RosettaFold.6 Protonating aspartate shown as red and G600N shown as orange sticks (a) Side view. (b) Top view. (c) Frontal view. (d) Measurment of N-O and N-C distance shows proximity to both atoms, which suggests a dual-function of the introduced amino acid as an anchor7 and/or Bronsted-base.8

**
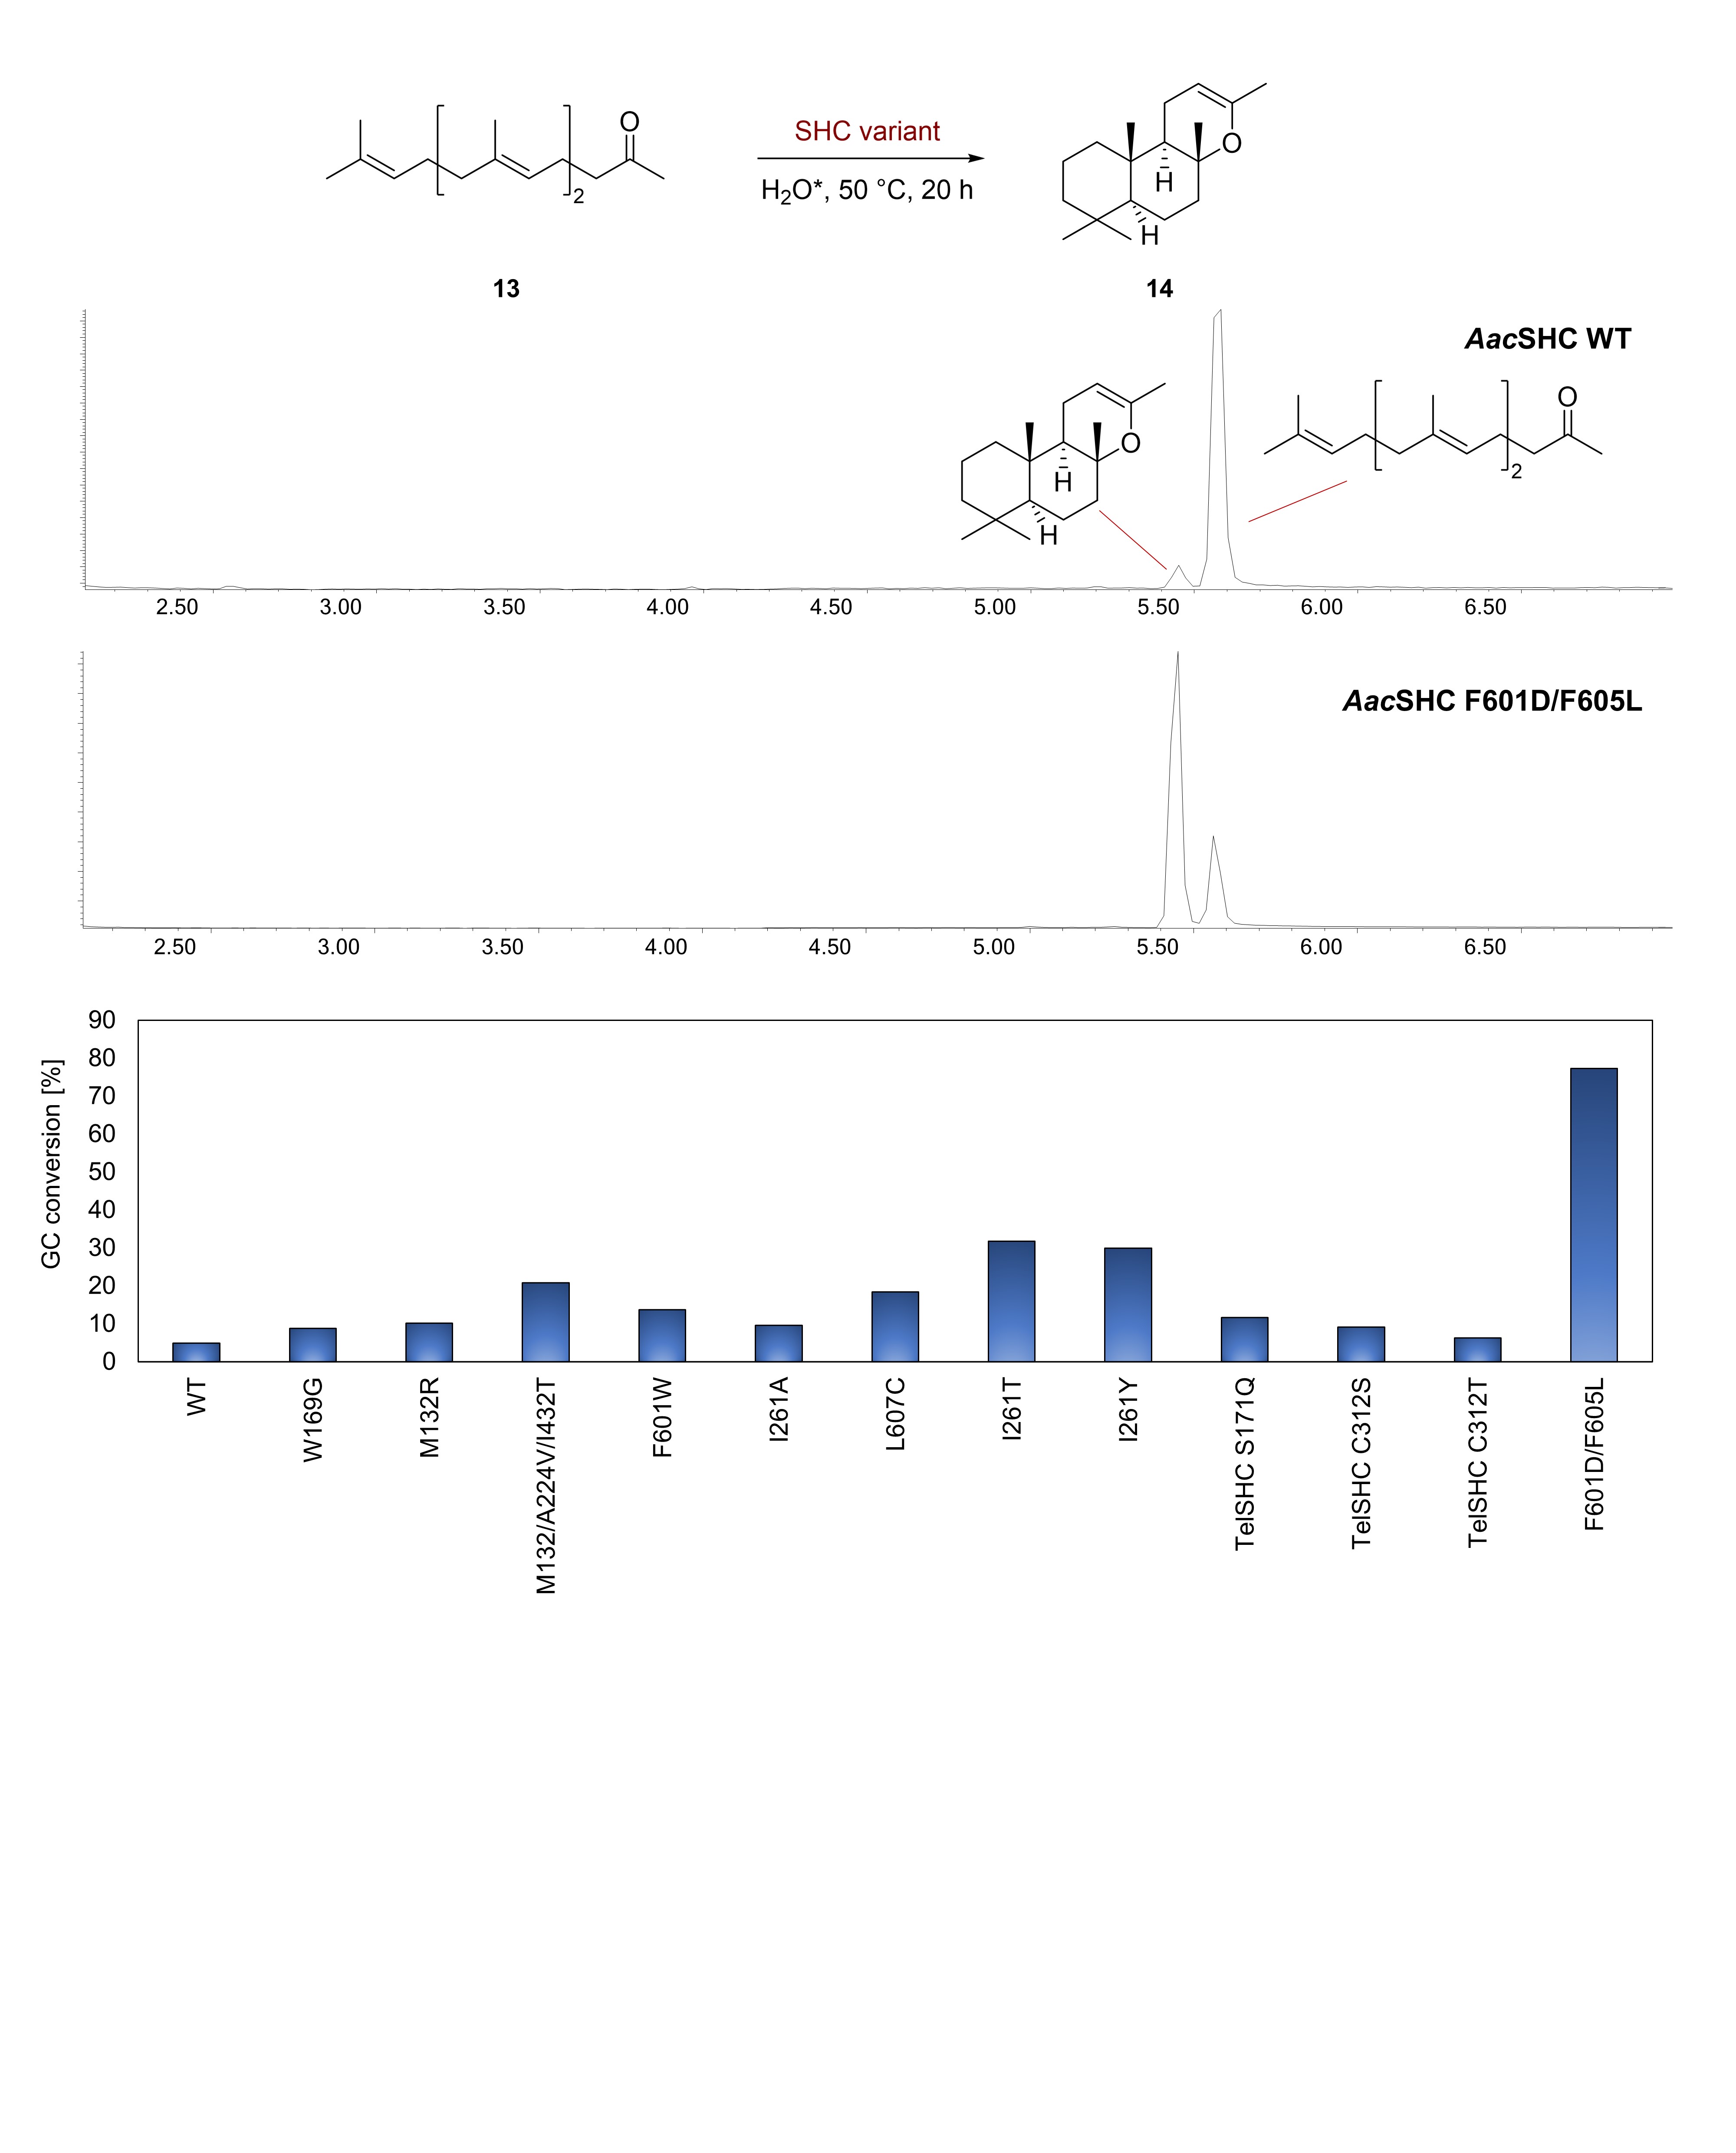
**

Figure S 7: Results of the internal SHC library screening for cyclization of E,E-farnesyl acetone 13to sclareoloxide **14**. Products were identifed by NMR. Variants were plotted against their GC conversion (lower columns) and selectivity (upper columns). GC conversion and selectivity was determined as [Area_product]/[Area_substrate+Area_products]. Conditions: 1 mM substrate, E. coli cells expressing SHC variant, OD = 20, 50 °C, 20 h. Enzyme expression was controlled via SDS-PAGE. Best hits were then compared in analytical biotransformations in water.

**
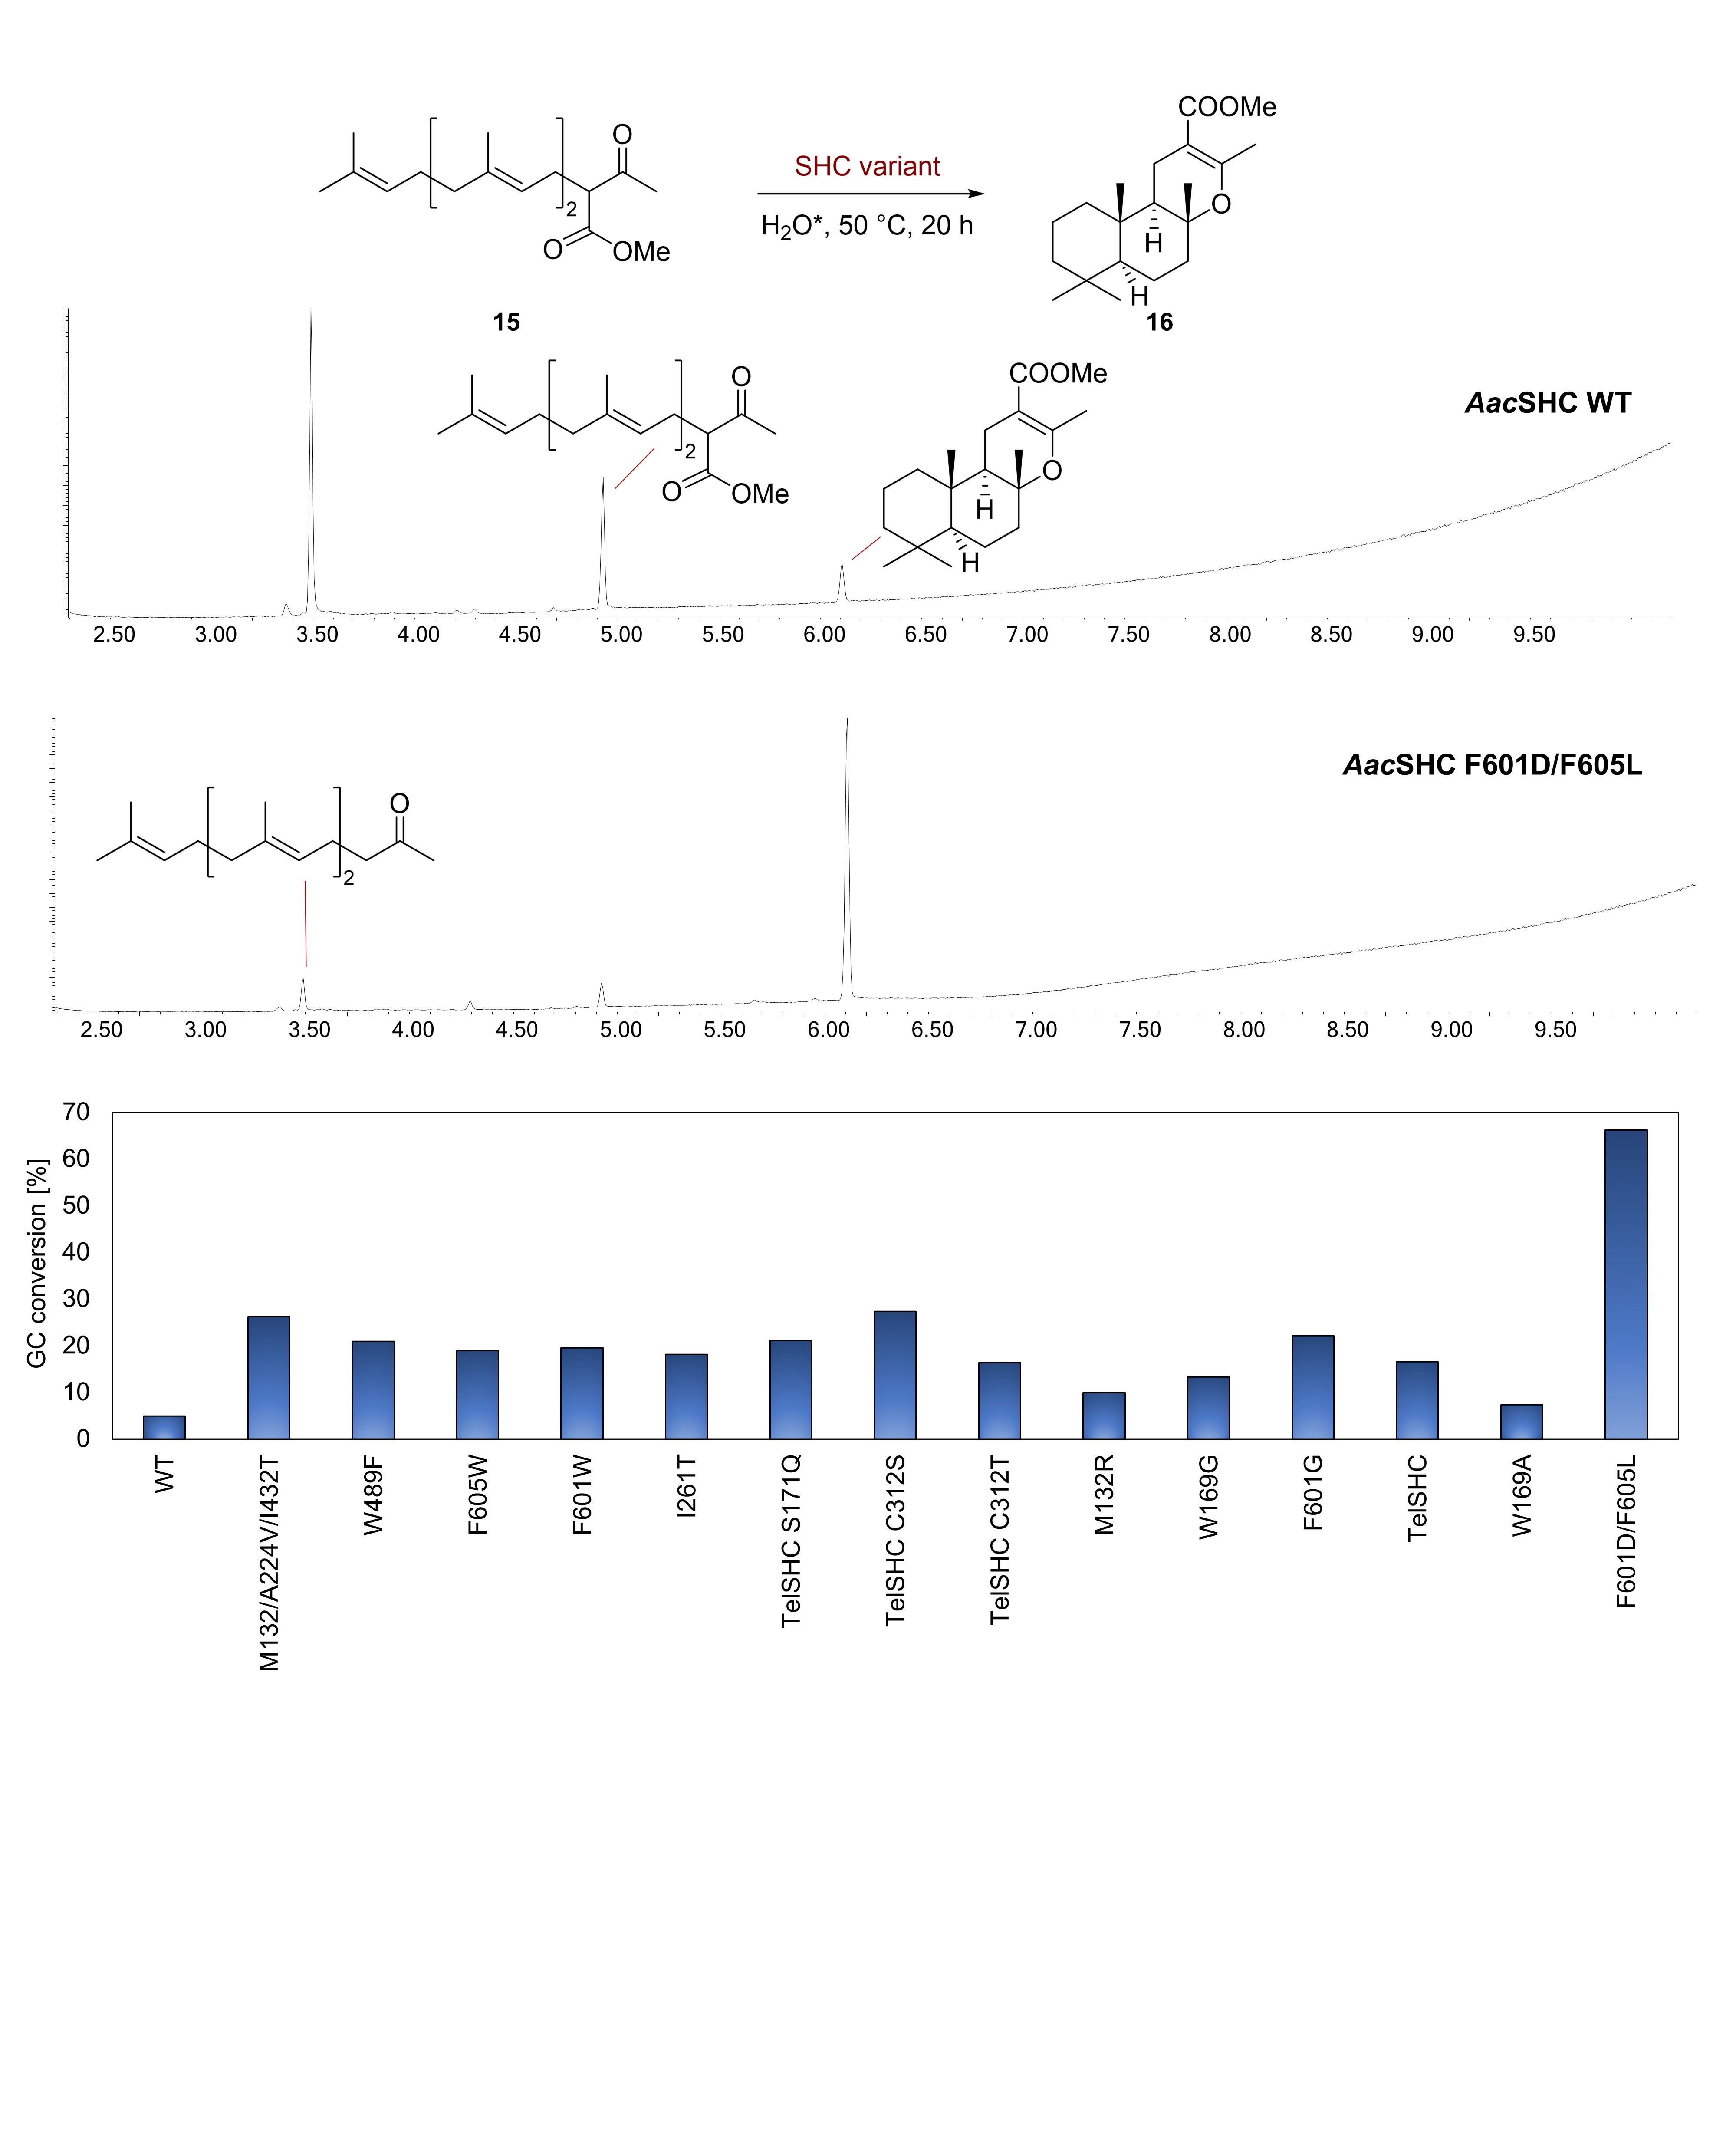
**

Figure S 8: Results of the internal SHC library screening for cyclization of ketoester 15 to product 16. Substrate 15 is prone to decarboxylate to 13 under GC injector conditions (300 °C). Products were identifed by NMR. Variants were plotted against their GC conversion (lower columns) and selectivity (upper columns). GC conversion and selectivity was determined as [Area_product]/[Area_substrate+Area_products]. Conditions: 1 mM substrate, E. coli cells expressing SHC variant, OD = 20, 50 °C, 20 h. Similar enzyme expression was determined via SDS-PAGE. Best hits were then compared in analytical biotransformations in water.


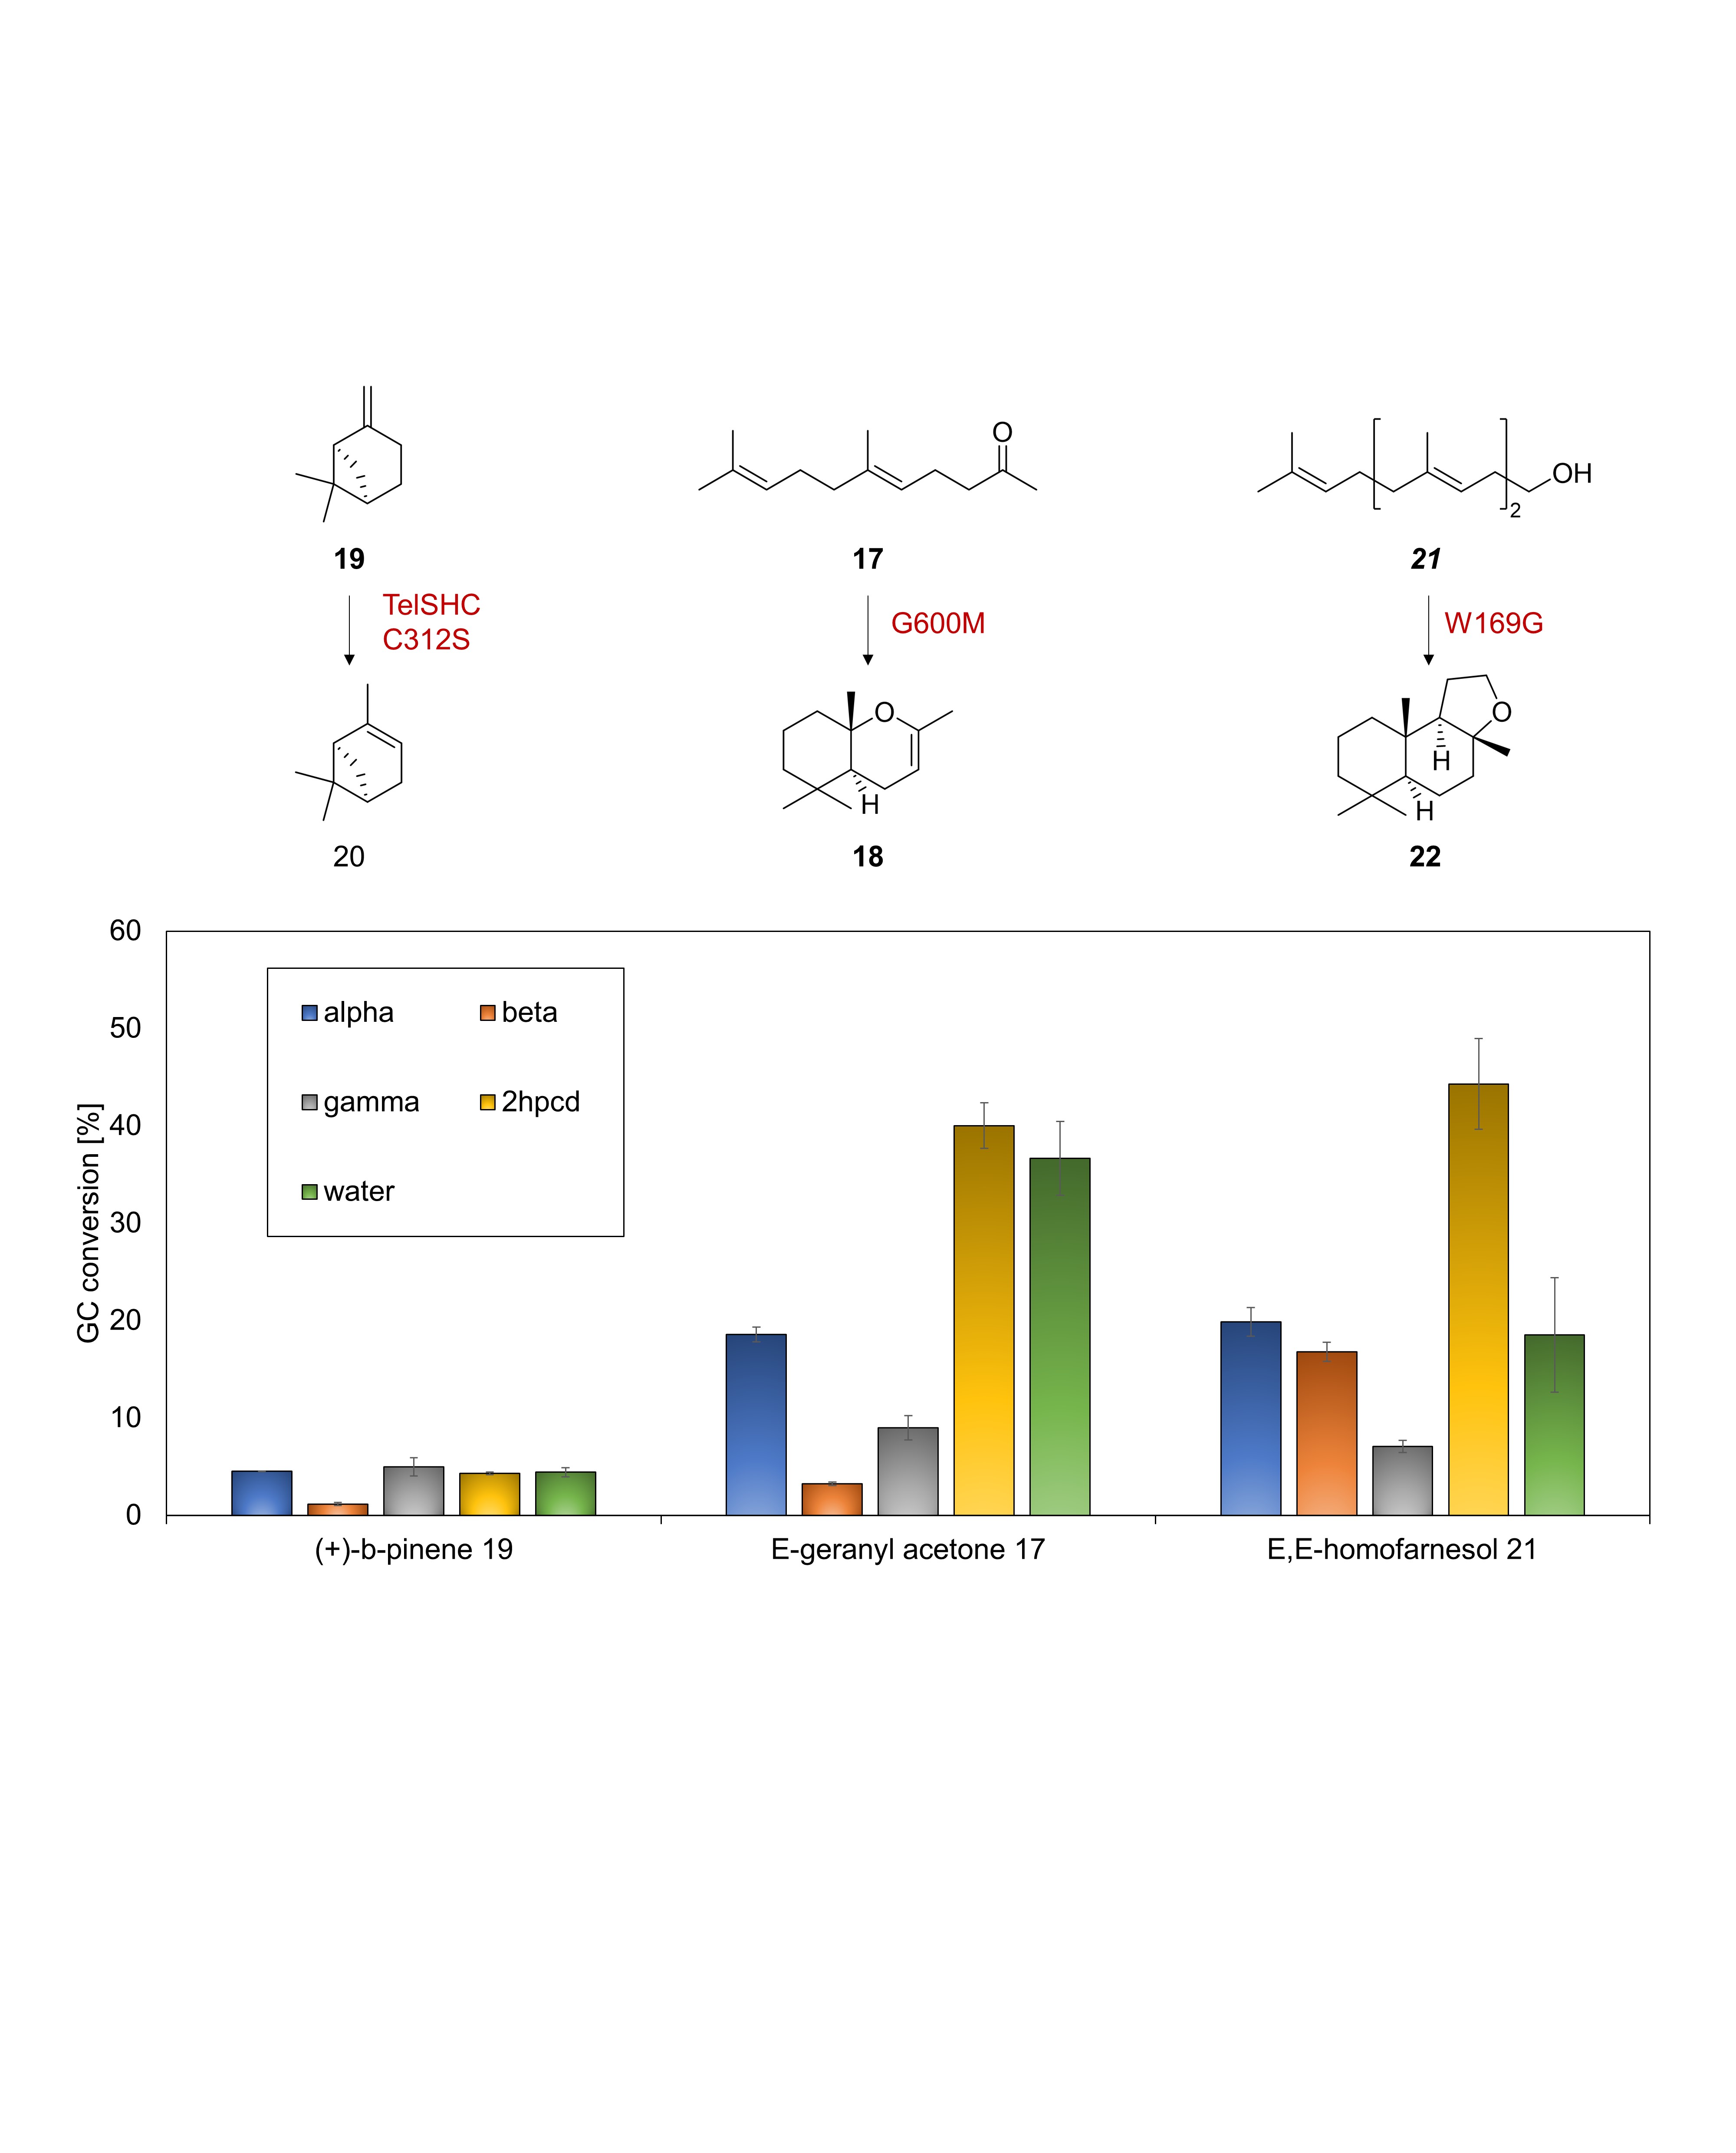


Figure S 9: Comparing α-, β-, γ-, and 2-hydroxypropyl-β-cyclodextrin in the biotransfromation of 19 to 20, 17 to 18 and 21 to 22 using different AacSHCs (red letters). Conditions: 10 gCDW/L E. coli cells expressing the SHC variant (red letters), 1 mM substrate, 1 mM cyclodextrin, ddH2O, 30 °C, 20 h.


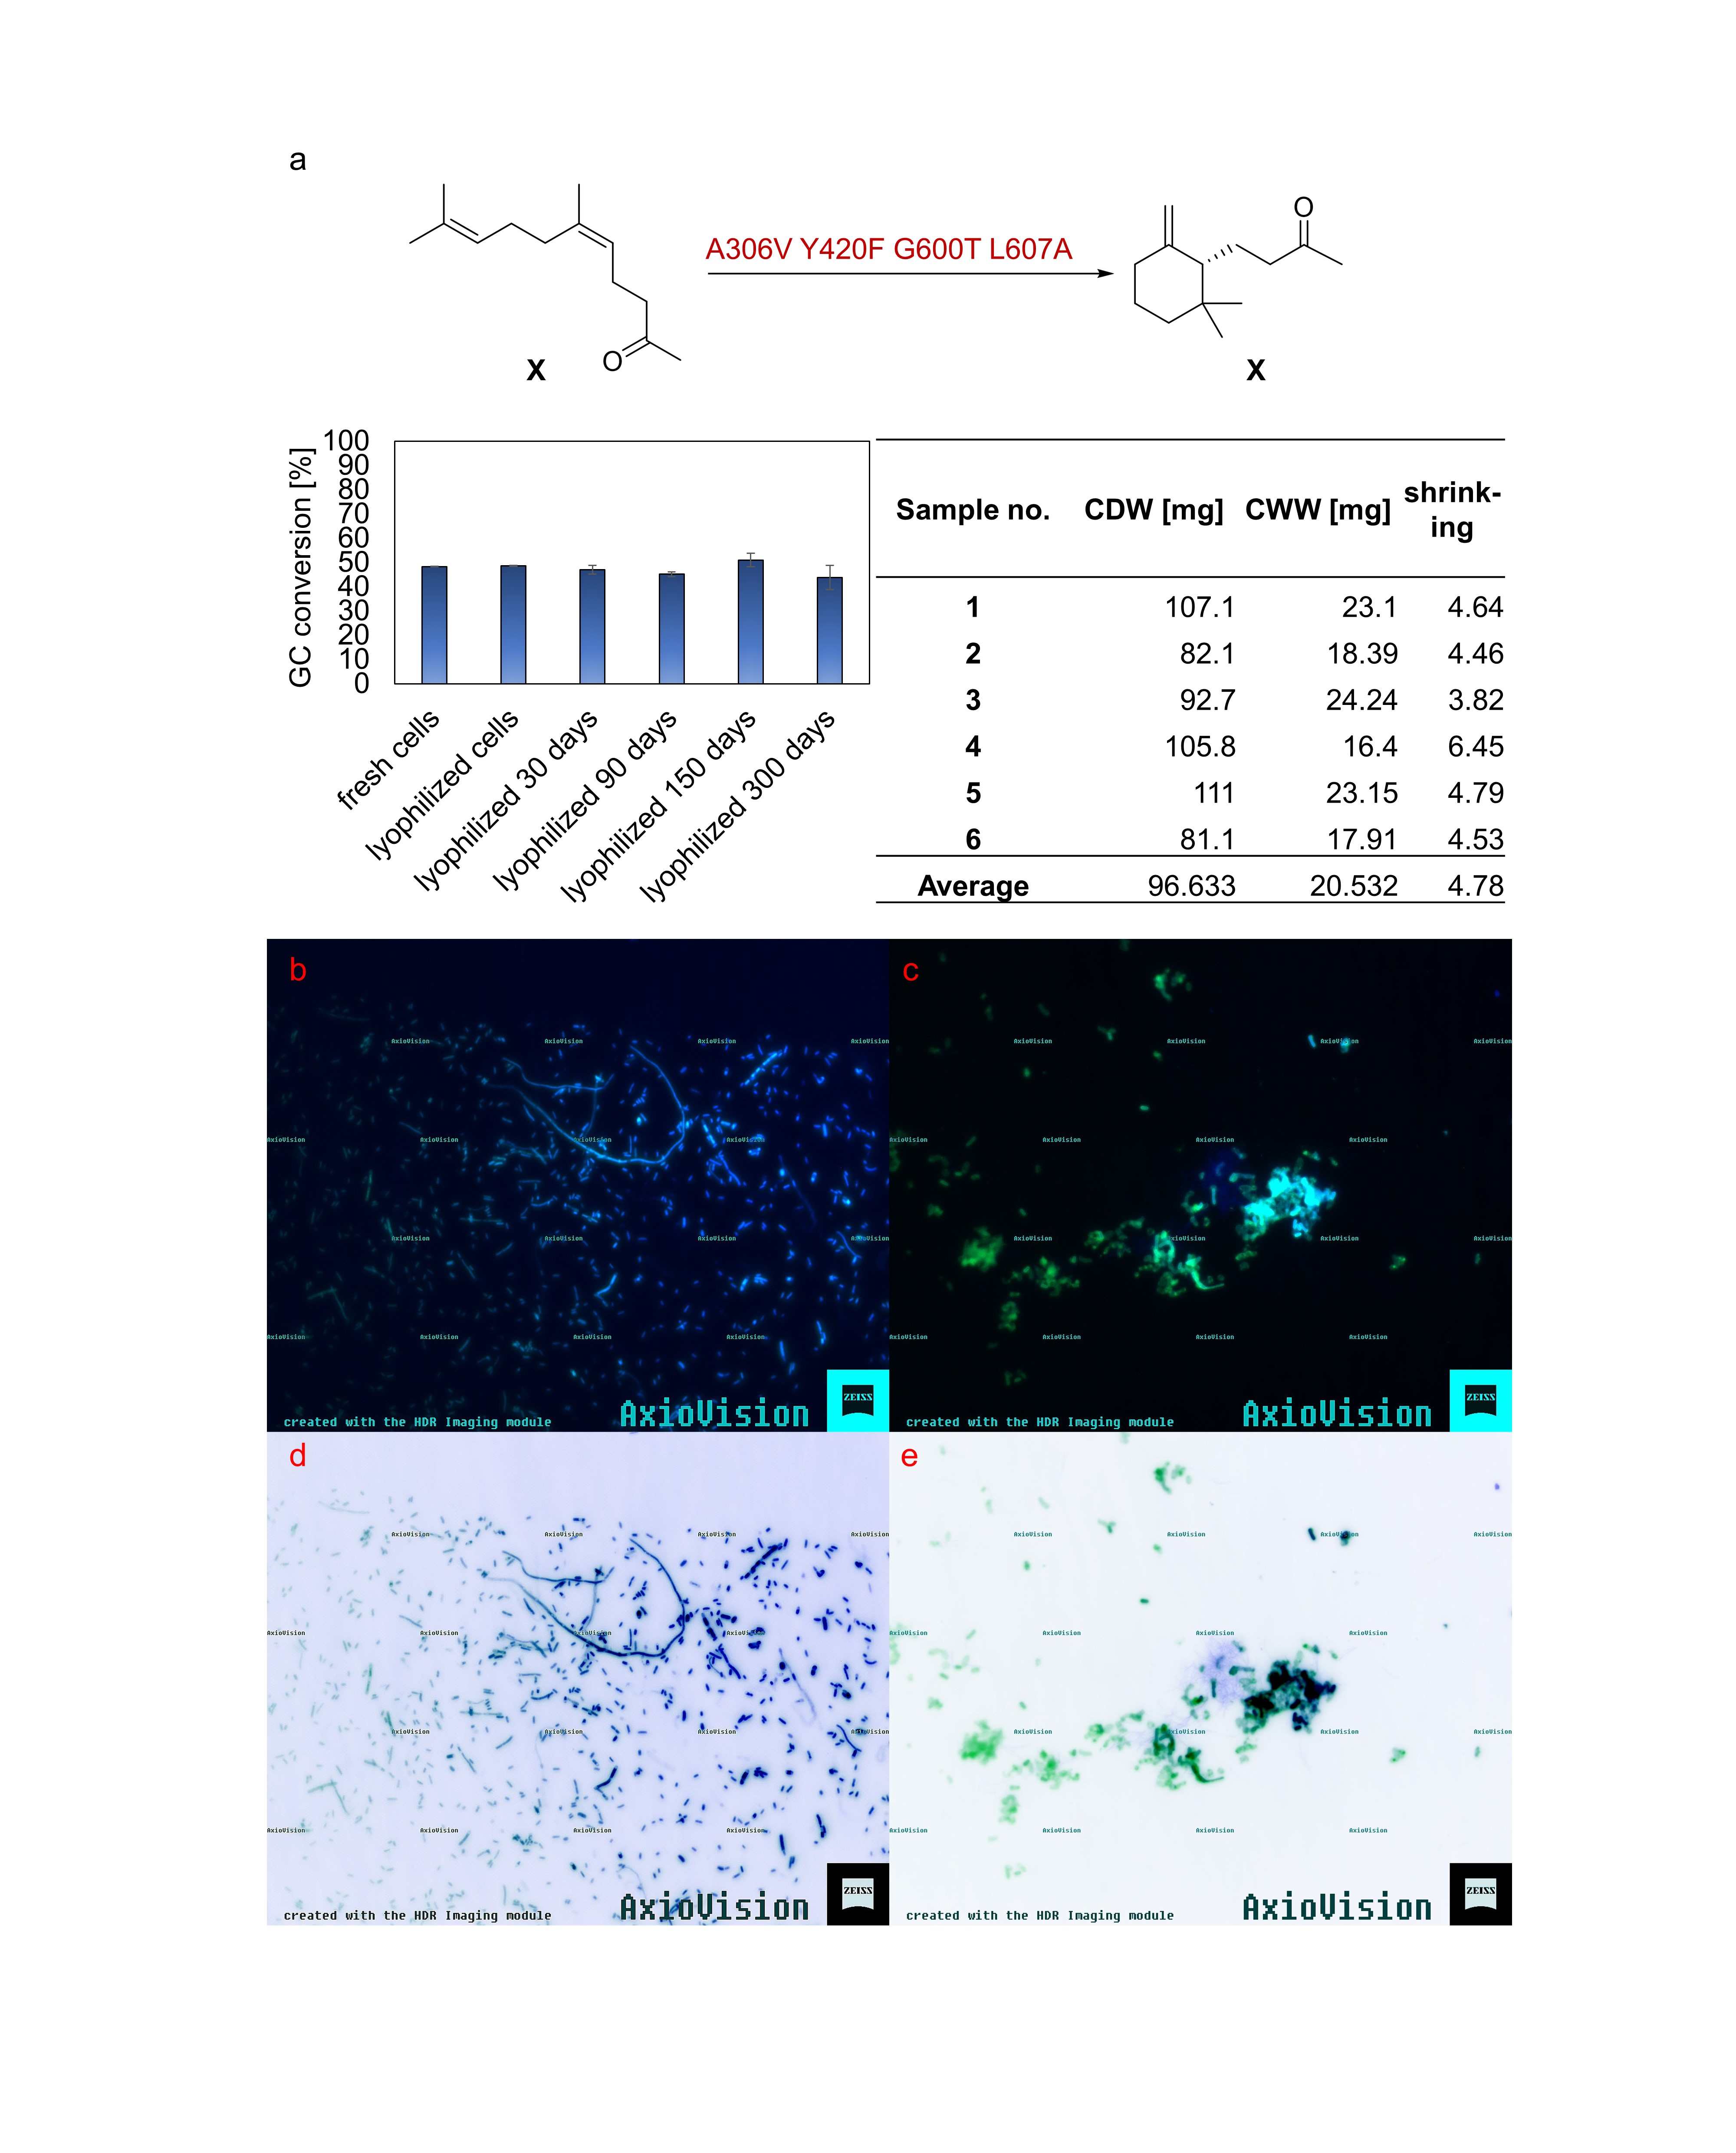


Figure S 10: Investigation on the SHC biocatalyst preparation as lyophilized E.coli cells. (a) Model reaction of **Z-17** monocyclization to (–)-γ-dihydroionone 24 with fresh cells and lyophilized cells shows almost no change in activity even after over 300 days. Average shrinking factor of fresh E. coli cells was determined with ~4.8. (b) Overlay of fluorescence microscope pictures taken from fresh E. coli cells stained with DAPI (blue) and SYTOX (green) demonstrates high abundance of living (blue) cells. (c) Overlay of fluorescence microscope pictures taken from lyophilized E. coli cells stained with DAPI (blue) and SYTOX (green) demonstrates high abundance of dead (green) cells or a mixture of living and dead cells (cyan). (d) and (e) are the negatives of (b) and (c). For details on Fluorescence microscopy please see section below.


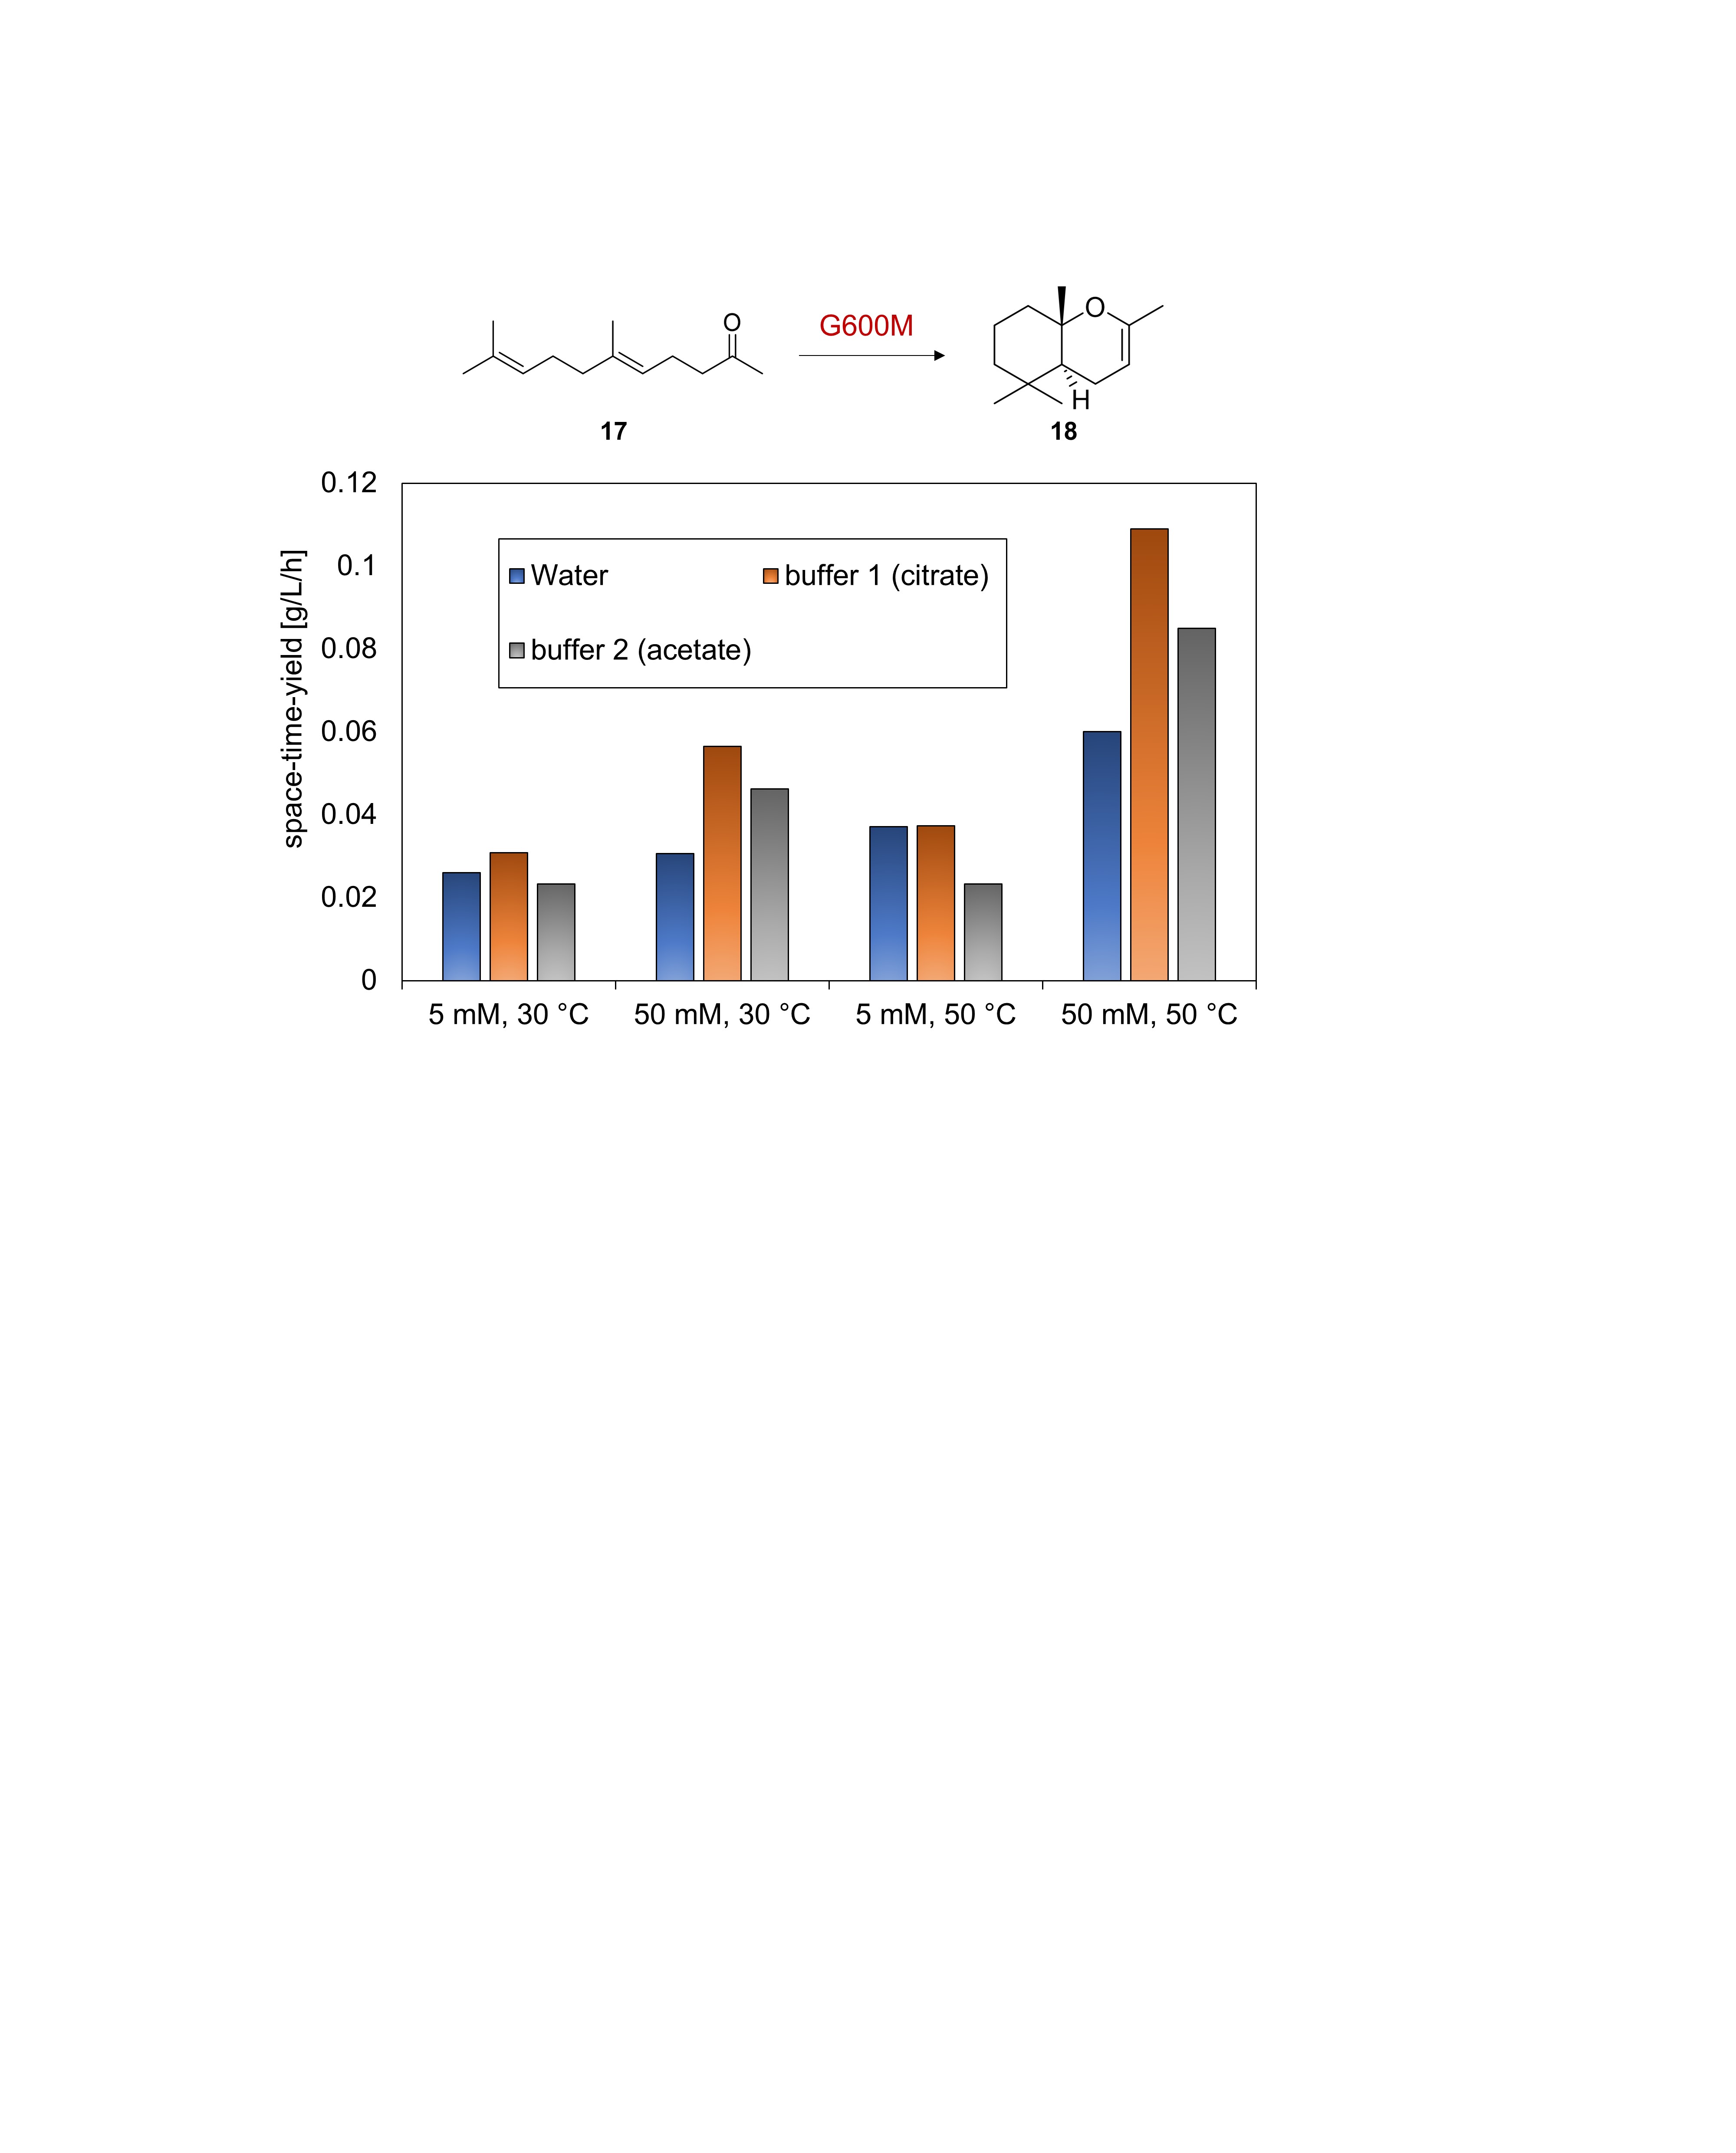


Figure S 11: Biotransformation of 17 to 18 using either water, 100 mM acetate or 100 mM citrate buffer at pH = 6.0 compared in their space-time-yields. Conditions: 10 gCDW/L E. coli cells expressing the SHC variant (red letters), substrate, 20 h. Space-time-yield was determined by [GC conversion]·[csubstrate]/[time].


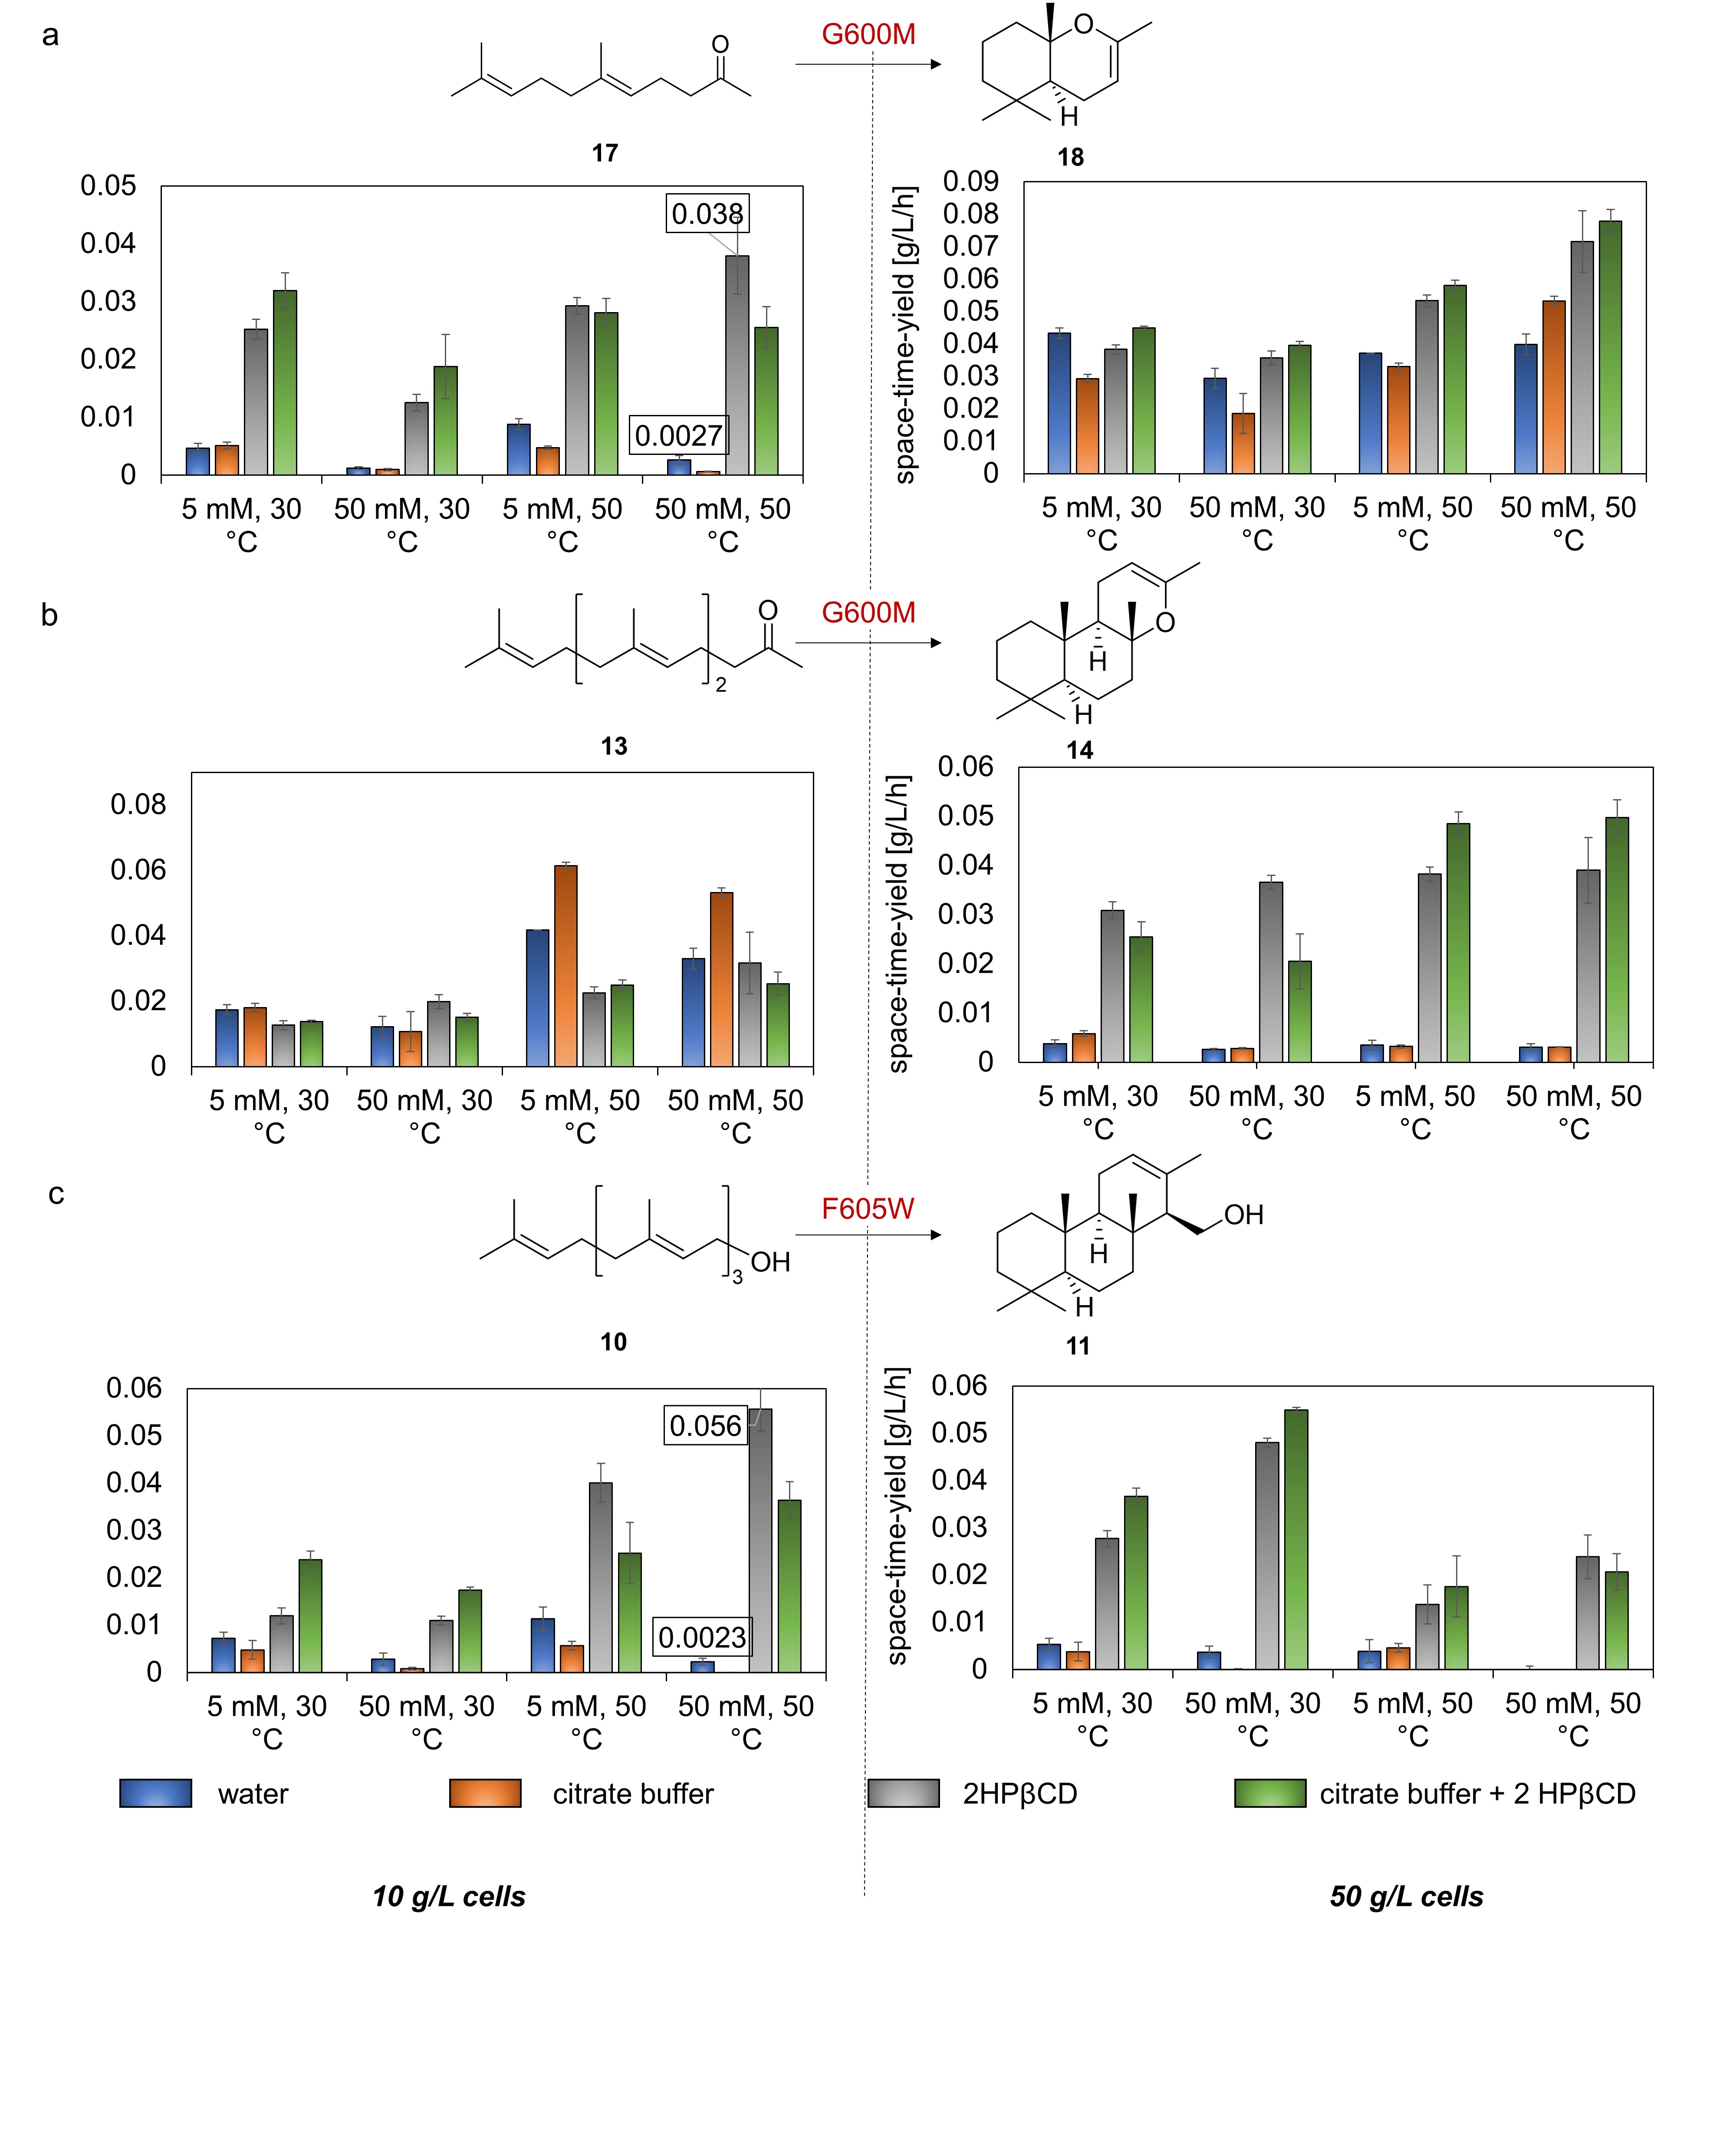


Figure S 12: Biotransformation of substrates 17, 13 and 10 using 10 or 50 gCDW/L E. coli cells expressing the corresponding SHC variant (red letters), different substrate concentrations (5 and 50 mM), temperatures (30 and 50 °C) and additives (see color code; citrate = 100 mM citric acid, pH = 6.0, 2HPβCD = 2-hydroxypropyl-β-cyclodextrin).


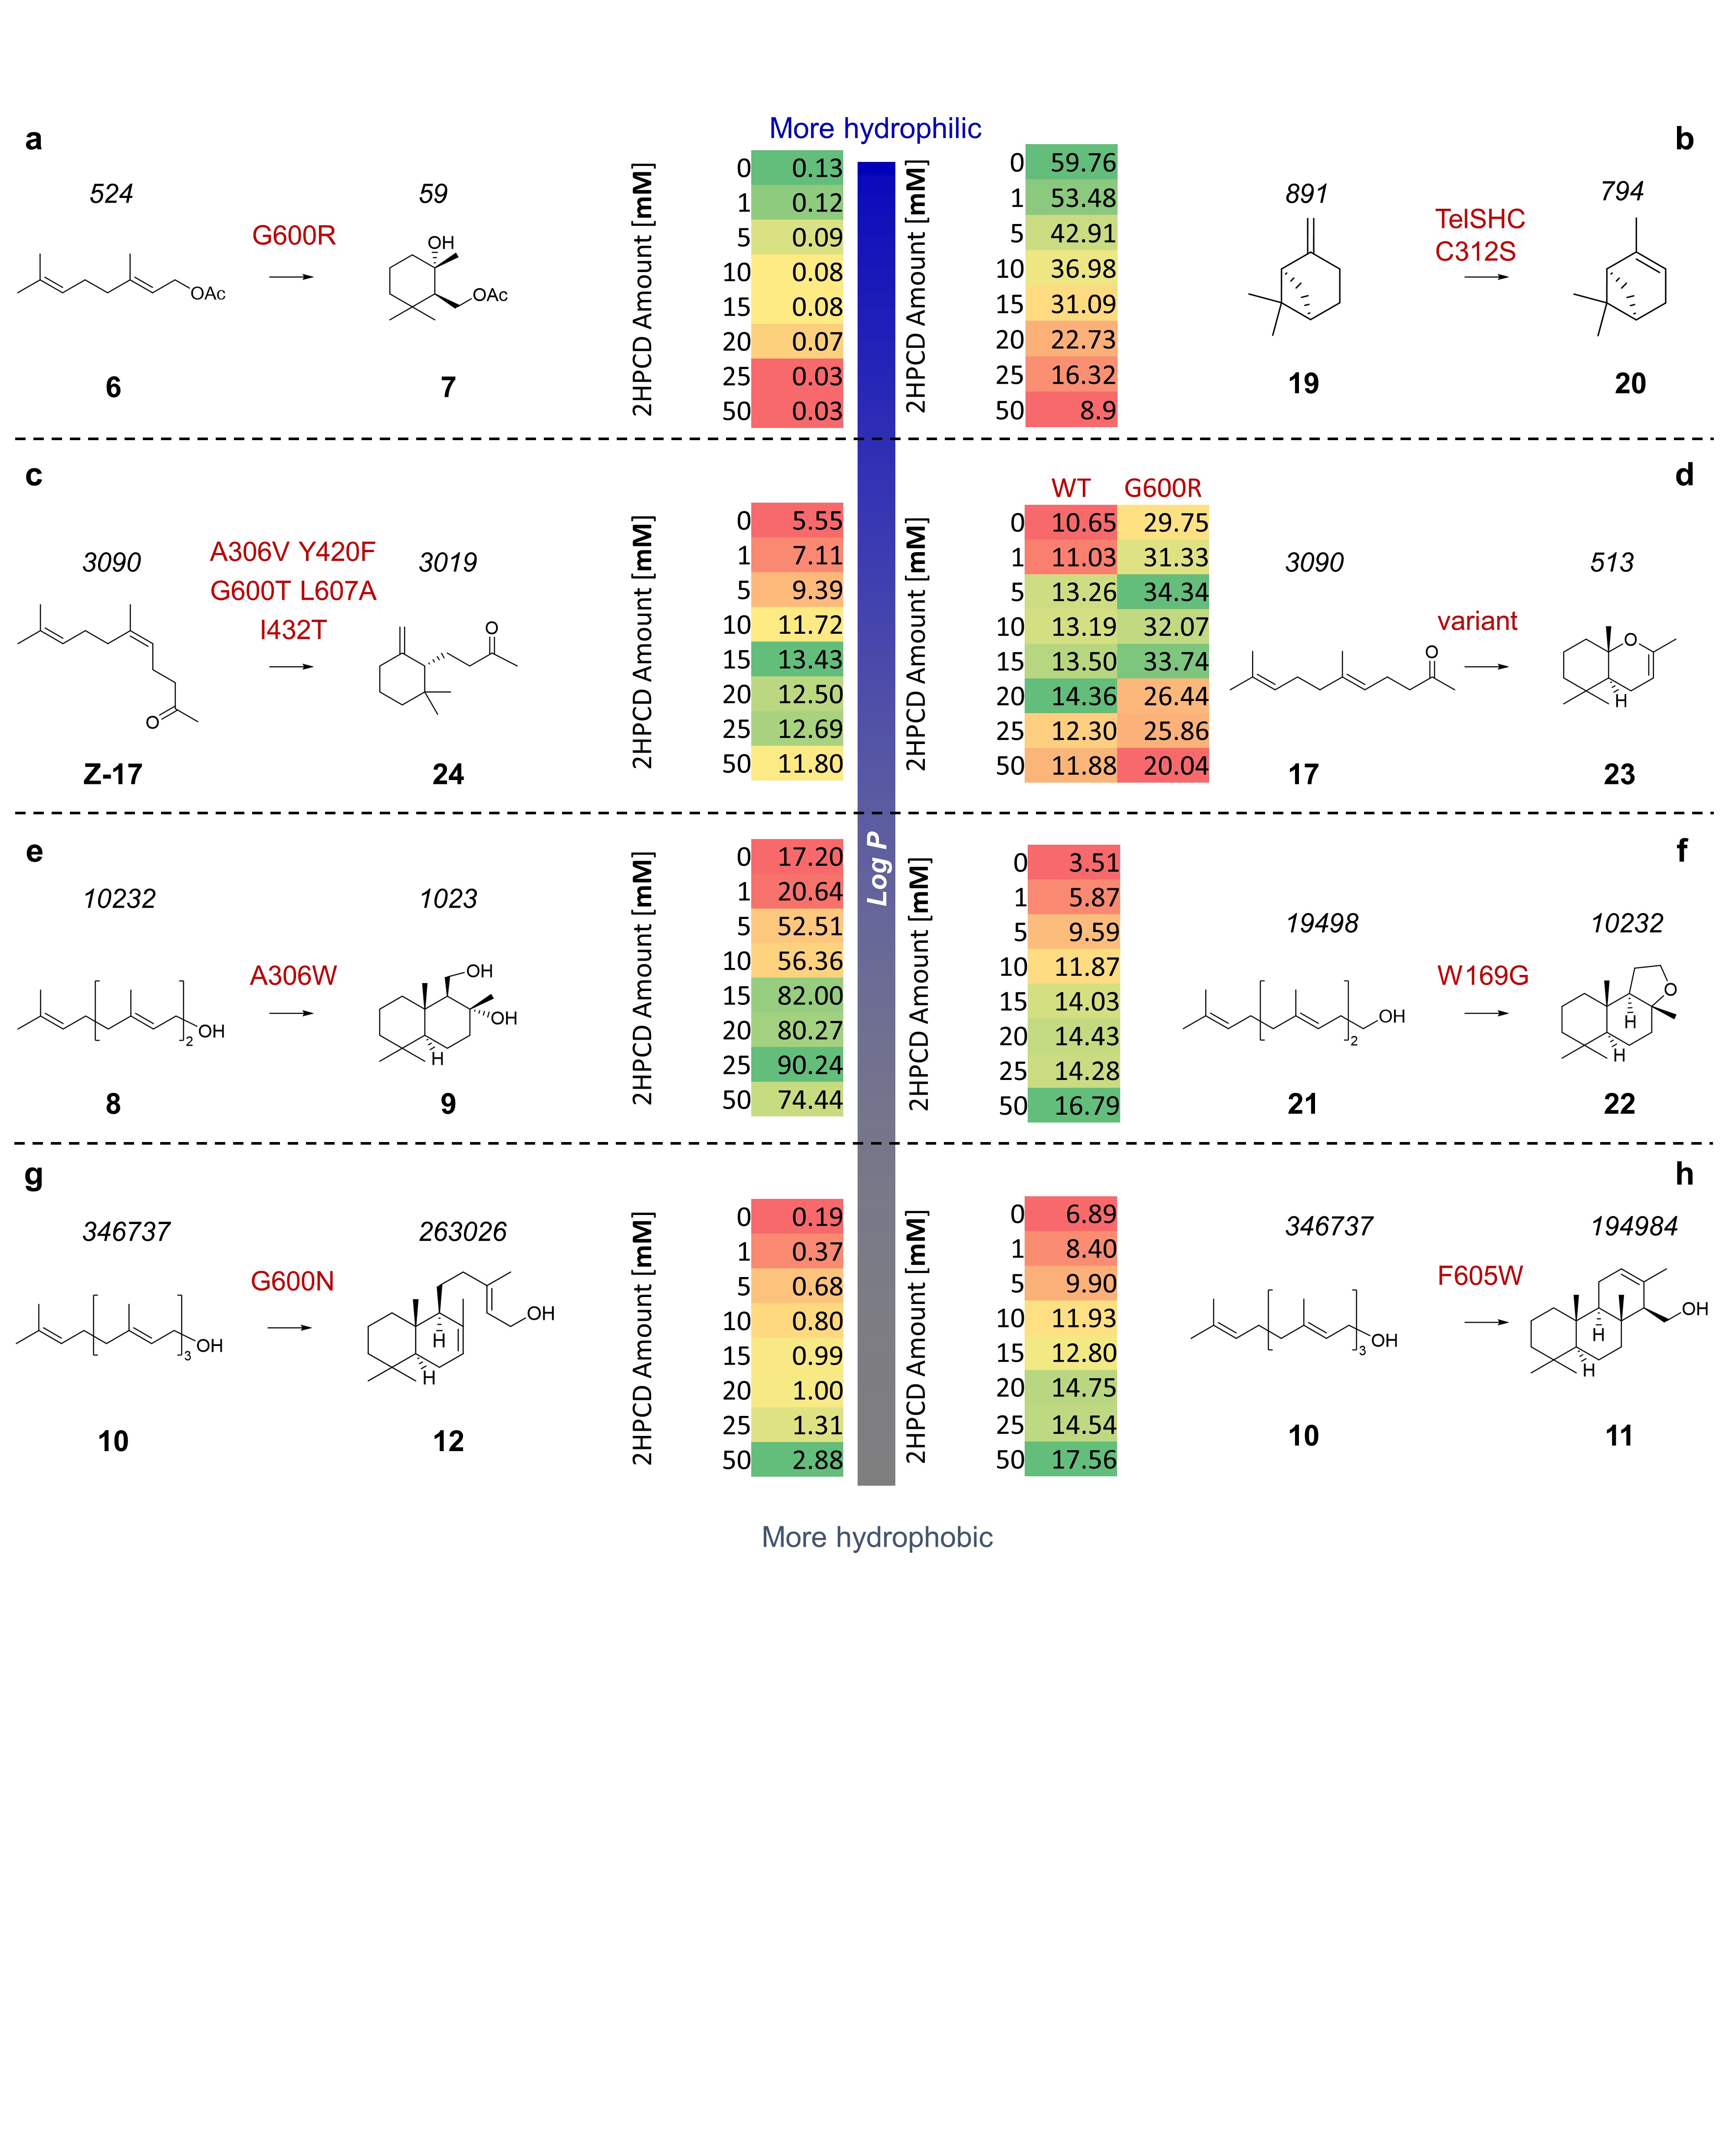


Figure S 13: Comprehensive evaluation of the beneficial encapsulation effect of 2-hydroxpropyl-β-cyclodextrin (2HPCD) on the biotransformation using different substrates and SHC variants (red letters). Conditions: 20 mM substrate, 10 gCDW/L cells, ddH2O, 50 °C. The brackets show the GC conversion of the substrates after 20 h. Green designates better conversion. The results demomnstrate that with increasing P (= 10logP, black italic numbers above substrates) and thus increasing hydrophobicity the beneficial effect of cyclodextrin increases as well. LogP was claculated by ChemDraw.


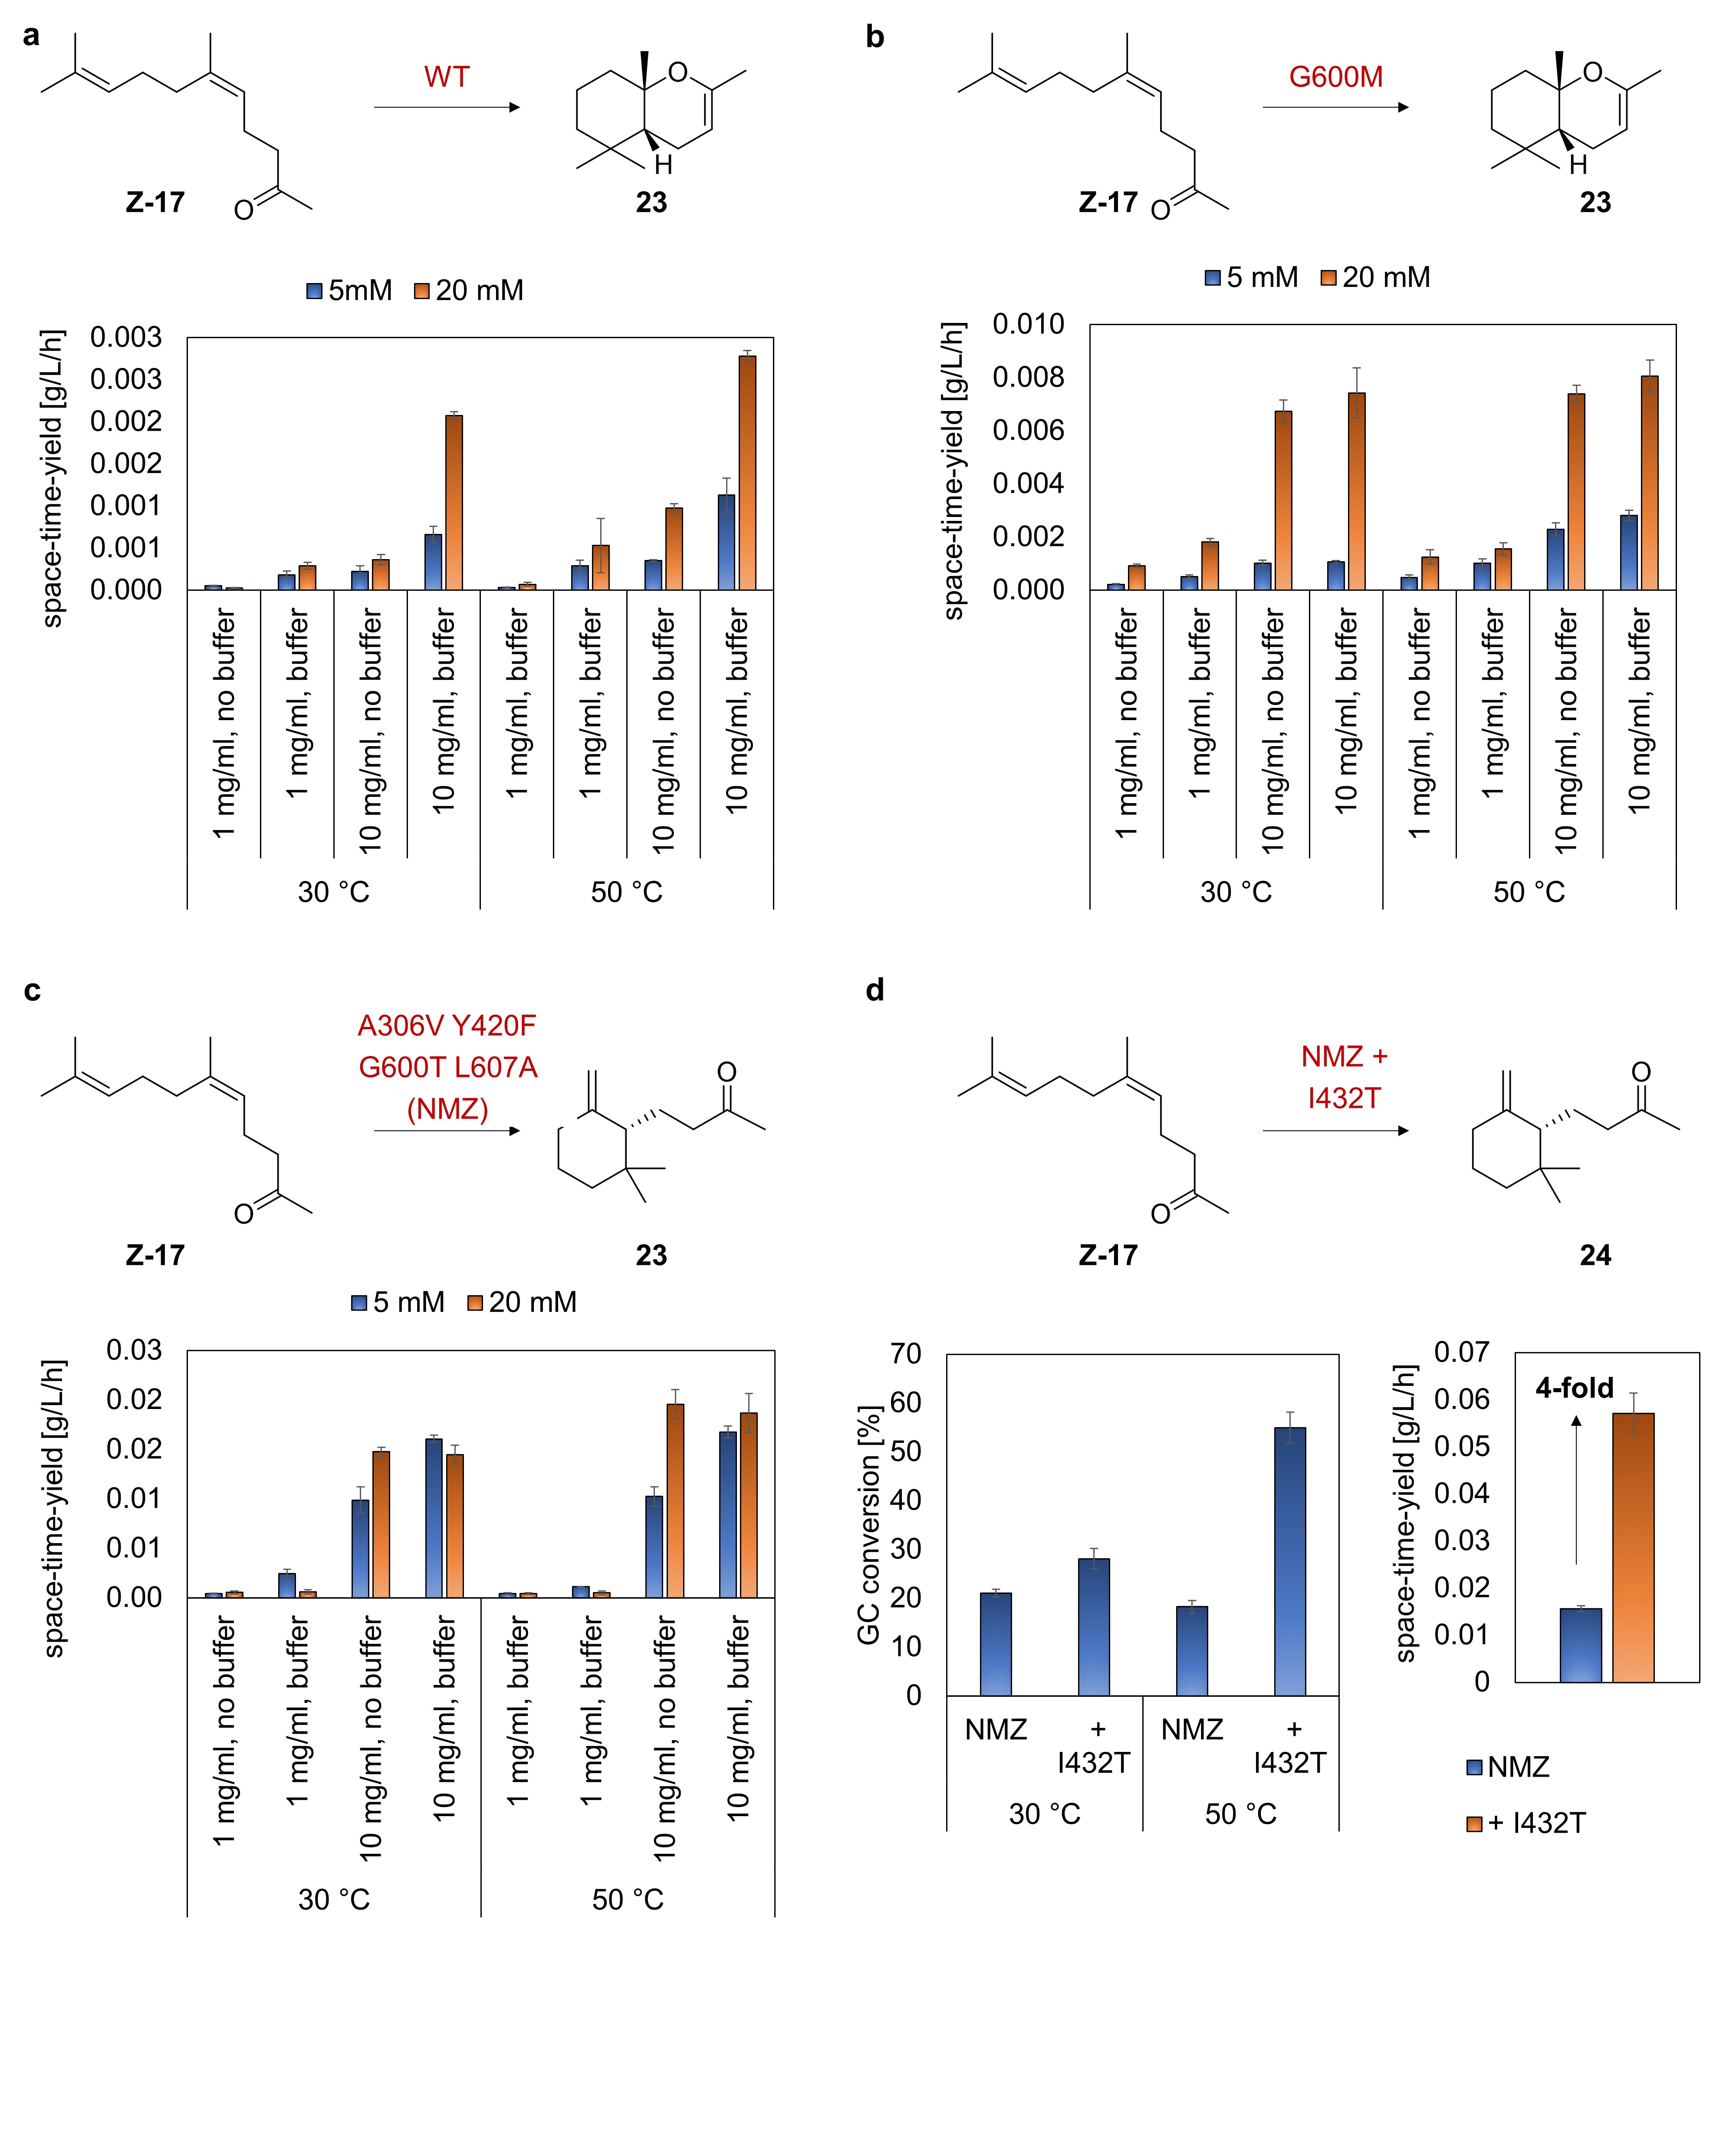


Figure S 14: Biotransfromations of Z-17 using different SHC variants (red letters) at differing conditions. (a) Biotransformation of Z-17 with AacSHC WT shows increased space-time yields at higher temperatures (50 °C) and higher substrate concentration (20 mM). (b) Single-point mutant G600M of AacSHC still shows improved space-time-yields at higher temperatures (50 °C) and higher substrate concentration (20 mM). (c) Quadruple mutant NMZ shows some lowered space-time-yields higher substrate concentration (20 mM). (d) Pentuple variant NMZ+D432T, which was identified by CAVER9 analysis and subsequent site-saturation mutagenesis in the designated area (see ref. 10 for more information on this mutagenesis strategy), again showed increased GC conversion at higher temperature entailing 4-fold increased space-time-yield at high substrate concentration. Conditions for right graph: 10 gCDW/L cells, 50 mM substrate, 30 °C, ddH2O 20 h.


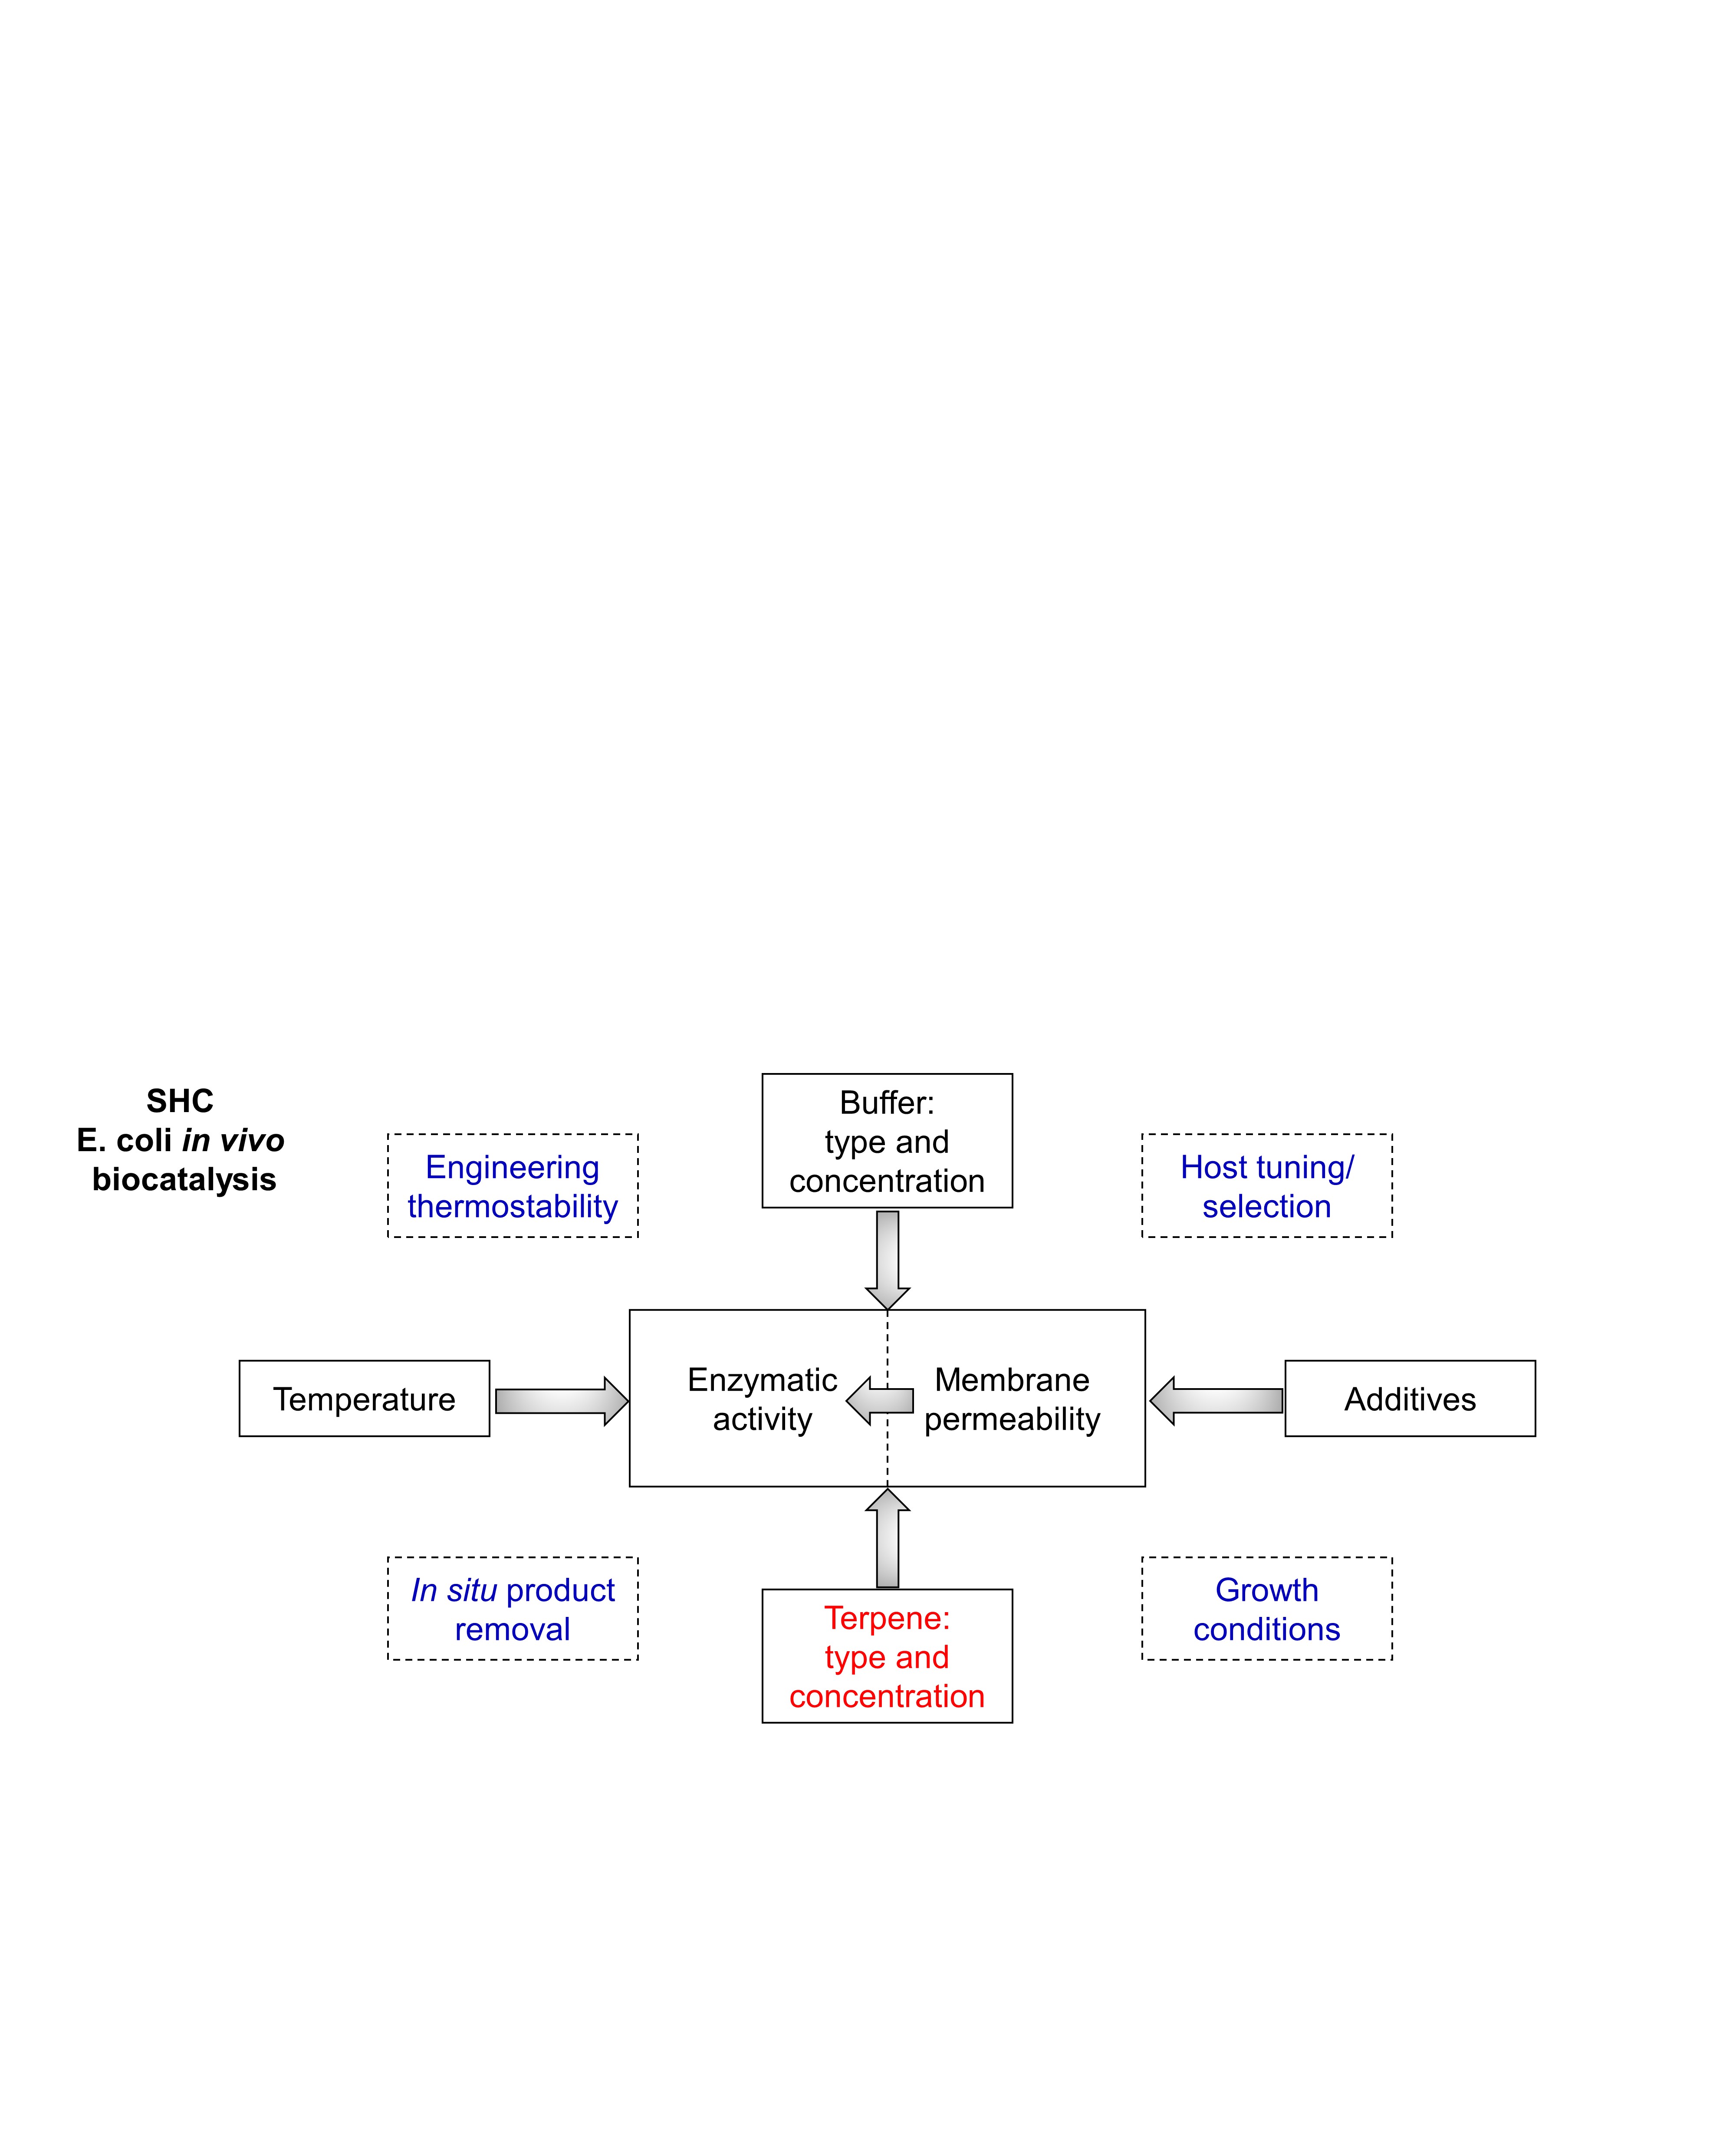


Figure S 15: Abiotic stress model of SHC biocatalysis. Influences that can affect the system consisting of enzyme and membrane are temperature, additives, terpene and buffer. The system can be augmented by engineering thermostability of the enzyme (see ref. 11 and Figure S14), in situ product removal techniques,12 cell constitution by means of growth conditions and the enzyme’s host.13 Membrane fluidity can potentially affect enzymetic activity as well.10,14 Terpene type (hydrophobicity) and concentration are strongly influencing the system.


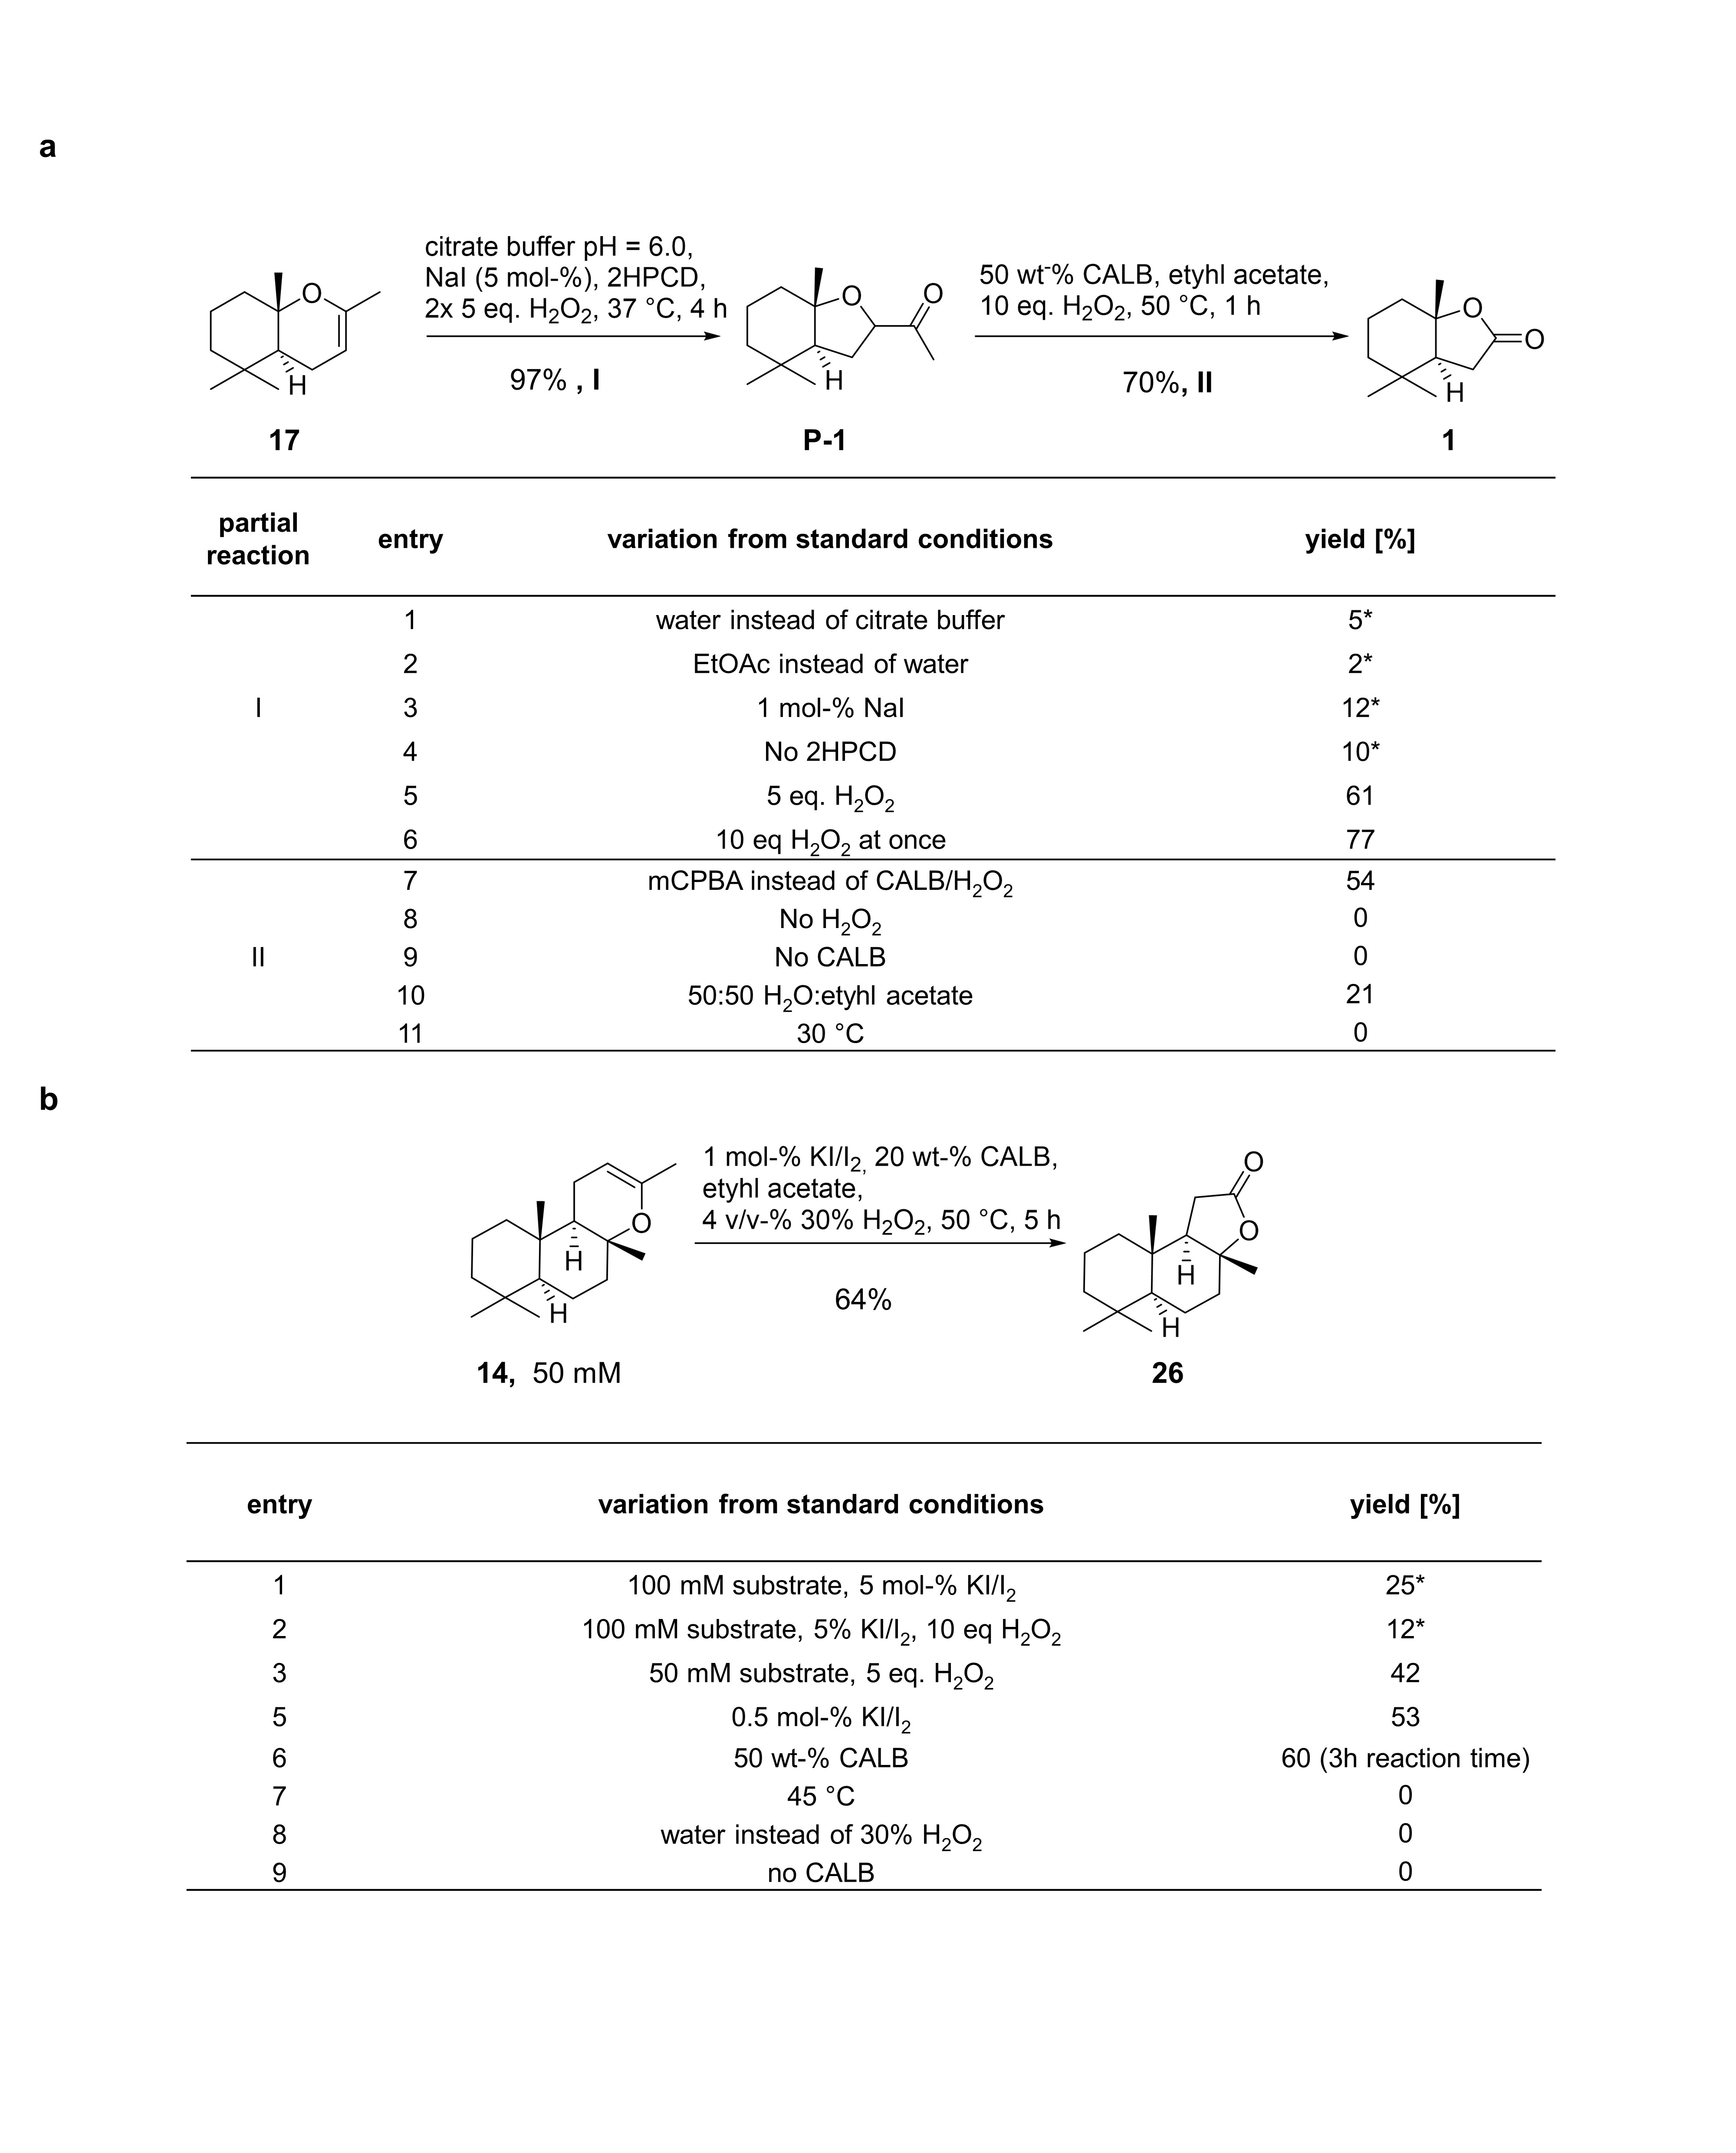


Figure S 16: Evaluation of optimal reaction condtions for (a) the iodine reaction and peroxidative rearrangement separately and (b) in one-pot. 2-hydroxpropyl-β-cyclodextrin = 2HPCD


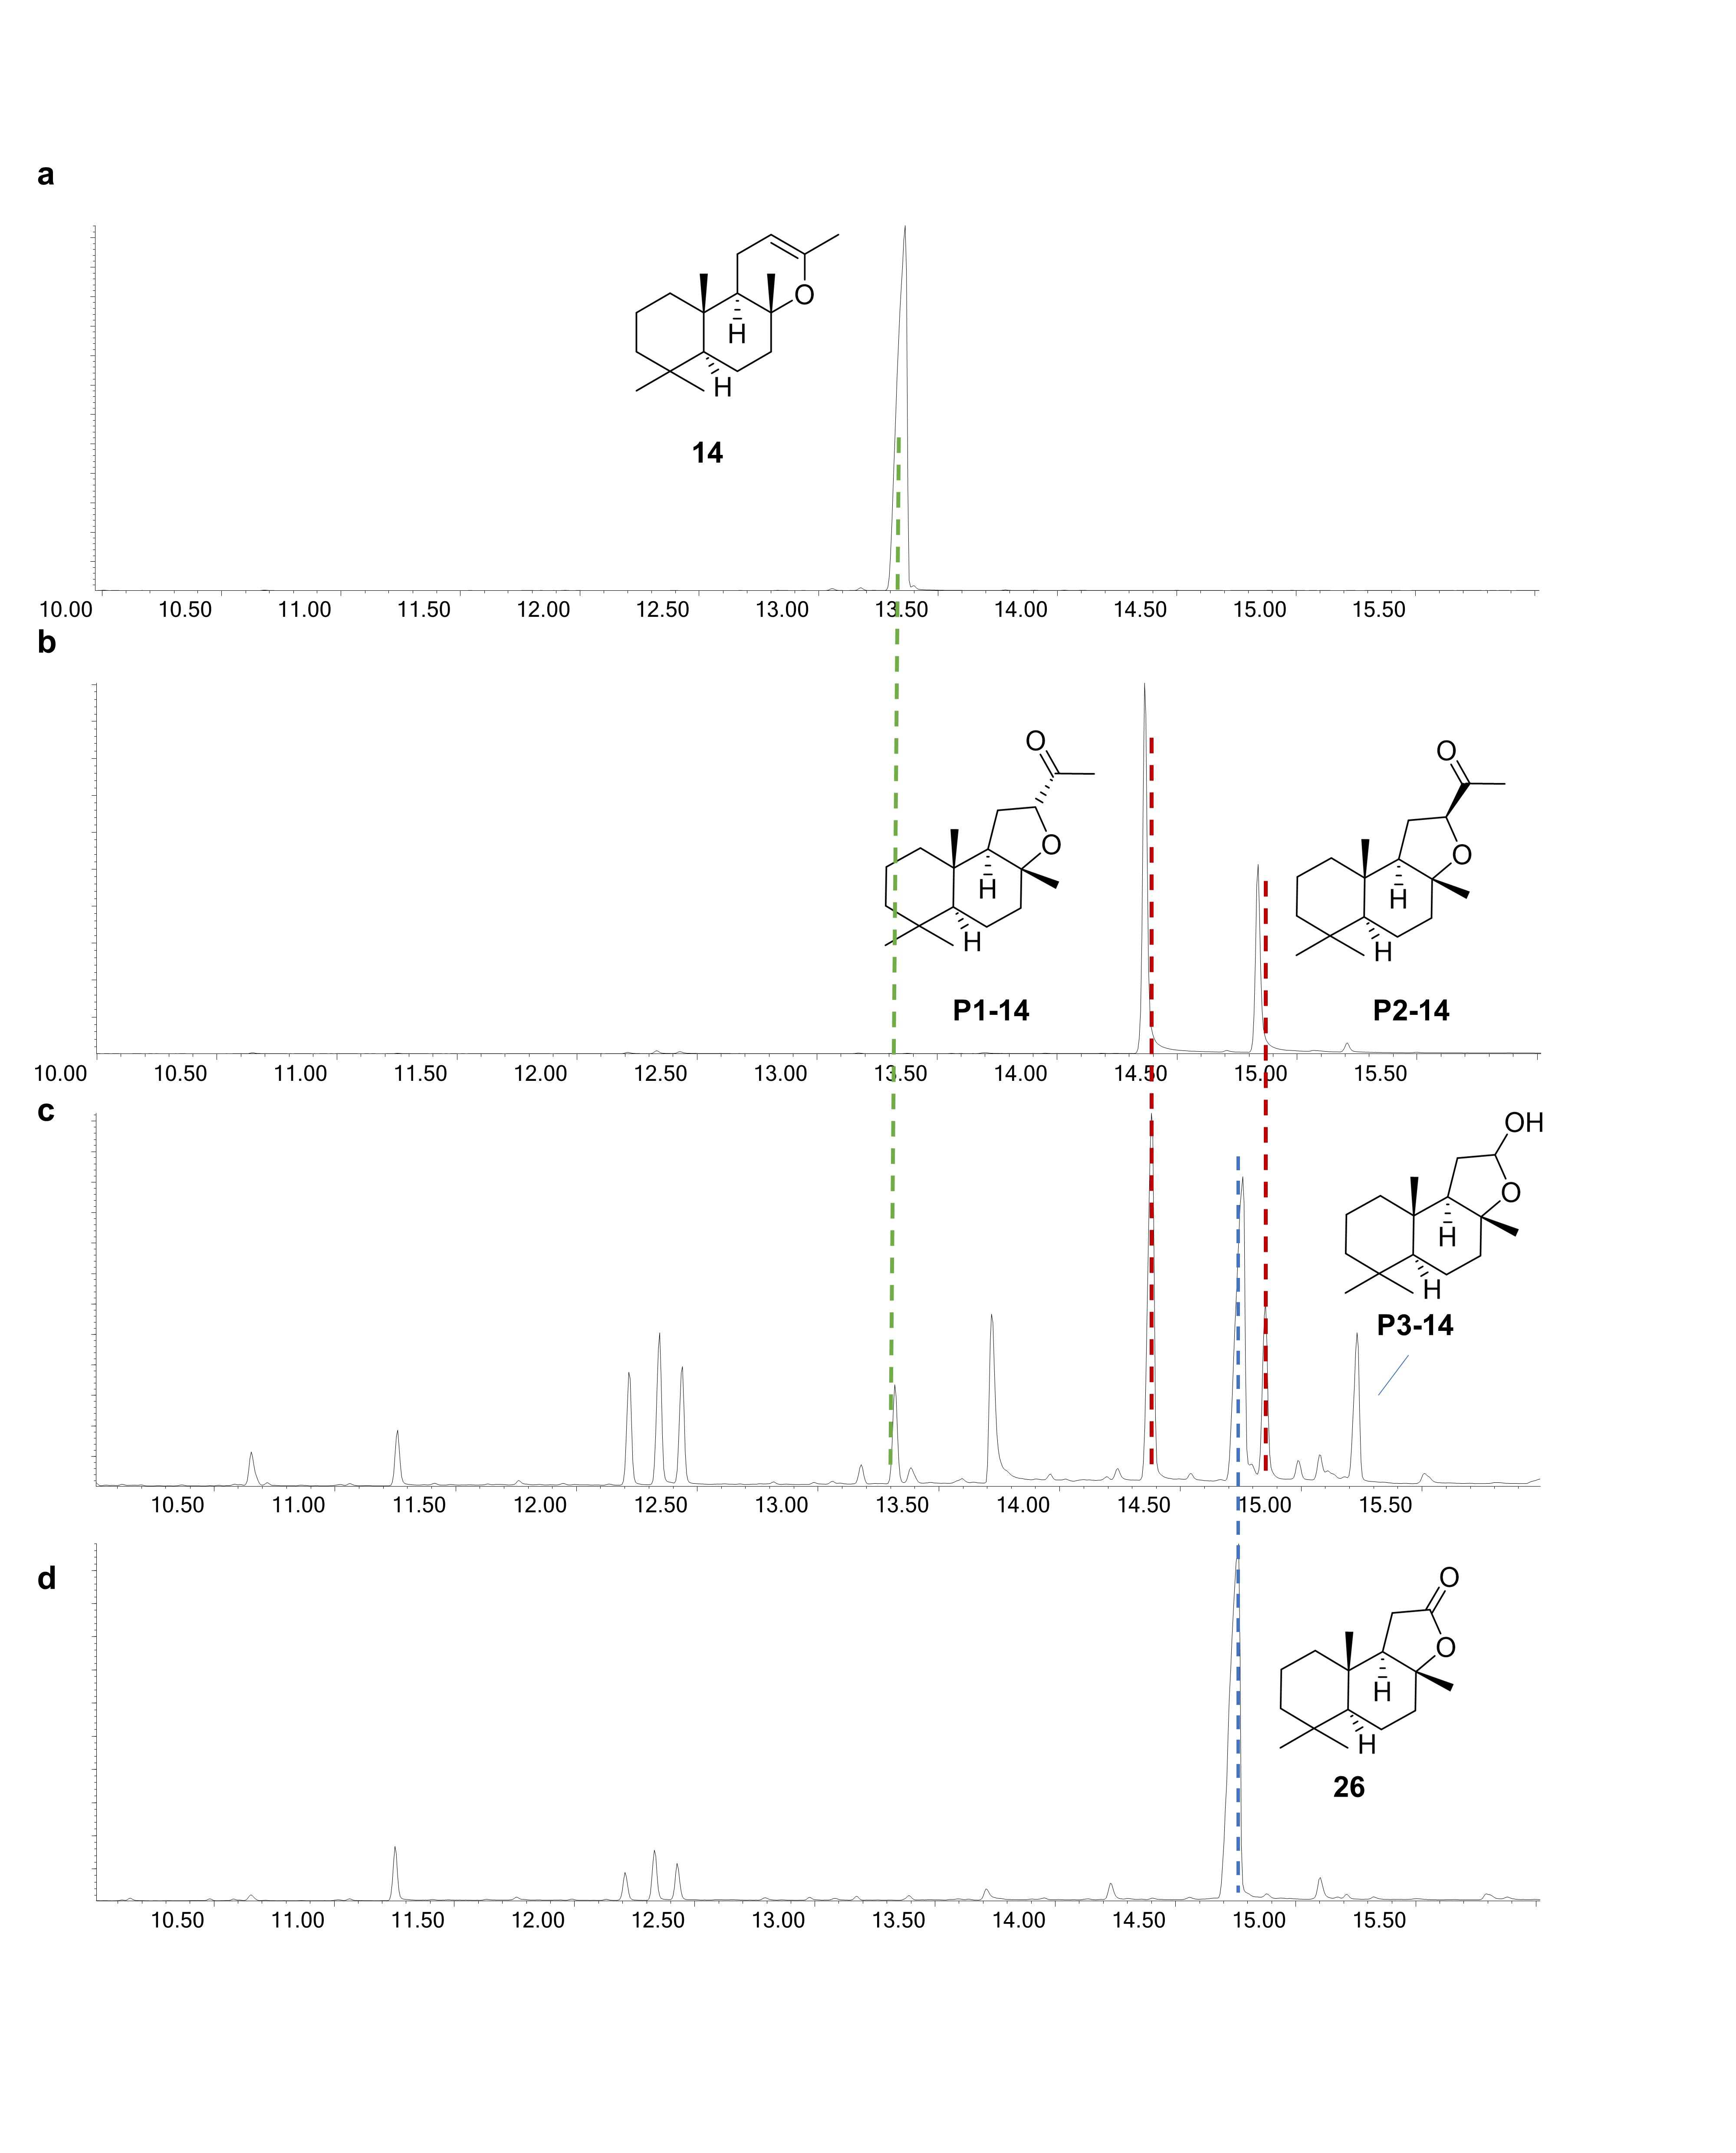


Figure S 17: Reaction control of the one-pot iodine/lipase rearrangement. (a) Substrate 14. (B) Ketone Intermediates P1-14 and P2-14. Major isomer was determined via NOESY (see NMR section) (c) Reaction chosing bad condtions and showing side-product sclaral P3-14, which presumably accumulates during the cleavage of a dimeric lactol anhydride (for more information on this mechanism please see ref. 15. d) Reaction under optimized conditions yielding high amounts of 26.


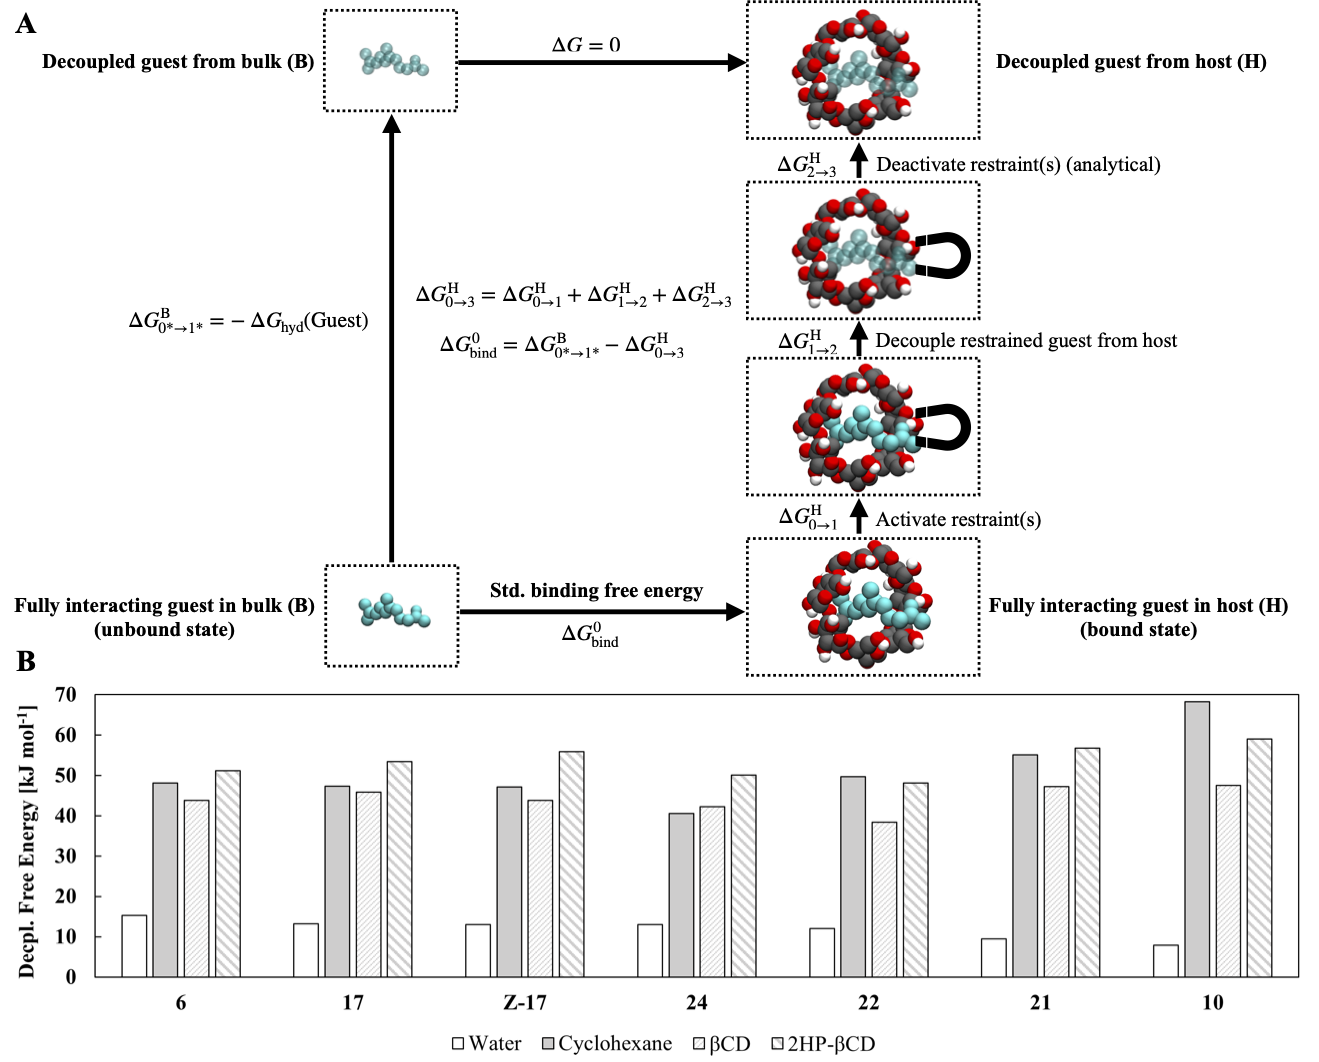


Figure S 18**:** (A) Thermodynamic cycle as applied in the double decoupling methodology (DDM). Free energy differences () for the relevant steps are denoted next to the arrows. Left vertical branch: substrate or product (both denoted as guest) molecule is decoupled from the bulk solvent environment (superscript B) keeping intact the intramolecular interactions. In case of water, this transfer free energy from solvent to an ideal gas phase corresponds to the negative hydration free energy of the guest molecule. Right vertical branch: guest molecule is decoupled from the host binding site (superscript H). represents the free energy change associated with activating a restraint between the host and the fully interacting guest; represents the free energy change associated with the process of decoupling the restrained guest within the host binding site while keeping the intramolecular interactions intact; accounts for the contribution of releasing the restraint from the non-interacting guest, which can be evaluated analytically. (B) Estimated decoupling free energies according to (A) from MD simulations for various guest molecules (denoted by their IDs) in different environments: bulk water (white), cyclohexane (grey), bound complex with β-cyclodextrin (βCD) (fine grey stripes), bound complex with 2-hydroxypropyl-β-cyclodextrin (2HP-βCD) (thick grey stripes). For water and cyclohexane, the free energy difference corresponds to , whereas the decoupling from the host molecules corresponds to the sum of the free energy differences, , of the right branch of the thermodynamic cycle (c.f. A). Statistical errors of the free differences were estimated with the MBAR estimator and are bound within +/- 1.5 kJ mol-1. Guest molecules are sorted by ascending size from left to right, with 12 C-atoms for geranyl acetate (6), 13 C-atoms for geranyl acetone (17), neryl acetone (Z-17), γ-dihydroionone (24), 16 C-atoms for ambroxide (22), homofarnesol (21) and 20 C-atoms for geranyl geraniol (10), respectively.

Supporting Table S 1: Literature research on terpene synthesis including the buzzwords ‘cyclization’, ‘asymmetric’, ‘stereoselective’ and ‘stereocontrolled’ on the website Web of Science (accessed on Feb 10th, 2023).

| **Buzzword in literature research** | **terpene synthesis** | **terpenoid synthesis** | **isoprenoid synthesis** |  |
| --- | --- | --- | --- | --- |
| + cyclization | 340 | 518 | 86 |  |
| + cyclization + asymmetric | 47 | 92 | 8 |  |
| + cyclization + stereoselective | 61 | 91 | 14 |  |
| + cyclization + stereocontrolled | 25 | 23 | 6 |  |
| + cationic cyclization | 23 | 32 | 3 |  |
| + cationic cyclization + asymmetric | 3 | 7 | 0 |  |
| + cationic cyclization + stereoselective | 4 | 2 | 0 |  |
| + cationic cyclization + stereocontrolled | 2 | 1 | 1 |  |
| **Total** | 2771 | 3500 | 2437 |  |
| **Share** [%] |  |  |  | **Average [%]** |
| cyclizations | 12.3 | 14.8 | 3.5 | 10.2 |
| stereocontrolled cyclizations | 4.8 | 5.9 | 1.1 | 3.9 |
| cationic cyclizations | 0.8 | 0.9 | 0.1 | 0.6 |
| stereocontrolled cationic cyclizations | 0.3 | 0.3 | 0.0 | 0.2 |

Supporting Table S 2: Selected examples of cationic cyclizations from the literature using the same substrates as in this study.

| **Substrate** | **Study** | **Catalyst** | **Issues** |
| --- | --- | --- | --- |
| 6 | Vlad16 | FSO3H | requires kryogenic conditions (-78 °C), low product selectivity, stereospecfic, substrate decomposition and polymerization |
| 6 | Vlad17 | Hg | stereospecific, toxic mercury, requires demercuration |
| 6 | Tsangarakis18 | NaY | low product selectivity, low stereocontrol |
| 8 | Vlad16,19,20 | FSO3H | requires kryogenic conditions (-78 °C), low product selectivity, stereospecfic, substrate decomposition and polymerization, no hydration product |
| 10 to 11 | Vlad16,19 | FSO3H | requires kryogenic conditions (-78 °C), low product selectivity, stereospecfic, substrate decomposition and polymerization |
| 10 to 12 | - |  |  |
| 13 | - |  |  |
| 15 | Parker21 | Hg | moderate yield, toxic mercury, requires demercuration, stereospecific |

Supporting Table S 3: Summary of upscales of this study.

| **substrate** | **density [g/mL]** | **MW [g/mol]** | **mol [mol]** | **mass [g]** | **[mL]** | **variant** | **volume [L]** | **Temperature [°C]** | **additives** | **substrate amount [mM]** | **substrate amount [g/L]** | **cell amount [g/L]** | **SHC amount [g/L]** | **SHC amount [mM]** | **catalyst loading [mol-%]** | **conversion [%]** | **yield [g]** | **yield [%]** | **time [h]** | **TTN** | **TOF [h-1]** |
| --- | --- | --- | --- | --- | --- | --- | --- | --- | --- | --- | --- | --- | --- | --- | --- | --- | --- | --- | --- | --- | --- |
| dihydroionone 24 | 0.87 | 194 | 0.0224 | 4.35 | 5 | A306V/Y420F/G600T/L607A/I432T | 1 | 30 | 15 mM CD | 22.4 | 4.35 | 10 | 1.8 | 0.03 | 1.12 | 97 | 3.87 | 89 | 120 | 863 | 7.19 |
| cyclogeranyl acetate hydrate 7 | 0.87 | 196 | 0.0011 | 0.2175 | 0.25 | G600R | 0.1 | 50 | - | 11.1 | 2.18 | 10 | 2.5 | 0.03 | 3.15 | 95 | 0.15 | 71 | 480 | 301 | 0.63 |
| drimendiol 9 | 0.88 | 222 | 0.0019 | 0.4312 | 0.49 | A306W | 0.1 | 30 | 25 mM CD | 19.4 | 4.31 | 10 | 1.5 | 0.02 | 1.08 | 96 | 0.34 | 80 | 72 | 888 | 12.33 |
| drimendiol S1-9 | 0.88 | 222 | 0.0019 | 0.4312 | 0.49 | L36V/Y420F/G600L | 0.1 | 30 | 25 mM CD | 19.4 | 4.31 | 10 | 2.5 | 0.03 | 1.80 | 90 | 0.30 | 70 | 192 | 500 | 2.60 |
| Labdane 12 | 0.89 | 290 | 0.0008 | 0.2225 | 0.25 | G600N | 0.1 | 50 | 50 mM CD | 7.7 | 2.23 | 10 | 3.2 | 0.04 | 5.84 | 95 | 0.17 | 78 | 216 | 163 | 0.75 |
| ent-iscopalol 11 | 0.89 | 290 | 0.0008 | 0.2225 | 0.25 | F605W | 0.1 | 50 | 50 mM CD | 7.7 | 2.23 | 10 | 1.7 | 0.02 | 3.10 | 91 | 0.18 | 79 | 96 | 293 | 3.06 |
| β-keto ester 16 | 0.87 | 320 | 0.0007 | 0.2175 | 0.25 | F601D/F605L | 0.1 | 50 | 50 mM CD | 6.8 | 2.18 | 10 | 2.5 | 0.03 | 5.15 | 96 | 0.17 | 80 | 96 | 186 | 1.94 |
| trans-hexahydrochromene 18 | 0.87 | 194 | 0.0011 | 0.2175 | 0.25 | G600M | 0.1 | 50 | 100 mM citrate buffer | 11.2 | 2.18 | 10 | 2.1 | 0.03 | 2.62 | 98 | 0.20 | 90 | 96 | 374 | 3.89 |
| cis-hexahydrochromene 23 | 0.87 | 194 | 0.0011 | 0.2175 | 0.25 | G600M | 0.1 | 50 | 100 mM citrate buffer | 11.2 | 2.18 | 10 | 2.1 | 0.03 | 2.62 | 90 | 0.18 | 82 | 120 | 343 | 2.86 |
| sclareoloxide 14 | 0.87 | 262 | 0.0017 | 0.435 | 0.5 | F601D/F605L | 0.1 | 50 | 50 mM CD | 16.6 | 4.35 | 10 | 2.5 | 0.03 | 2.11 | 99 | 0.40 | 92 | 72 | 470 | 6.52 |

Supporting Table S 4: List of buffers used in this work.

| **Buffer** | **Ingredients** |
| --- | --- |
| 10x phosphate buffer (KPi-buffer) | 0.17 M KH2PO4, 0.72 M K2HPO4, pH=7.4 |
| lysis buffer | 200 mM citric acid, 0.1% EDTA, pH=6.0 |
| extraction buffer | 100 mM citric acid, 1% CHAPS, pH=6.0 |
| citrate buffer | 100 mM citric acid, pH=6.0 |
| acetate buffer | 100 mM acetate acid, pH=6.0 |
| cyclodextrin buffer | 5-50 mM 2HPCD, 100 mM citric acid, pH=6.0 |
| PBS buffer | 137 mM NaCl, 2.7 mM KCl, 10 mM Na2HPO4 pH=7.4 |

Supporting Table S 5: List of media used in this work.

| **Medium** | **Ingredients** |
| --- | --- |
| Lysogeny broth (LB) | 10 g/L tryptone, 10 g/L NaCl, 5 g/L yeast extract |
| Auto-induction medium (T-DAB) | 12 g/L tryptone, 24 g/L yeast extract, 2.9 g/L glucose, 11.1 g/L Glycerol, 7.6 g/L Lactose |

Supporting Table S 6: List of primers used in this work.

| **Entry** | | **Name** | **Sequence (5´🡪3´) Forward/Reverse** |
| --- | --- | --- | --- |
| 1 | AacSHC D432NNK | | GCGATCTGCCGAACCATNNKCCGTTTTGCGATTTTGGC/ GCCAAAATCGCAAAACGGMNNATGGTTCGGCAGATCGC |

Supporting Table S 7**:** Summary of estimated decoupling free energies () of the guest molecules in bulk solvent (water and cyclohexane) according to Fig. S18 (a). The value of corresponds to the negative solvation free energy in the corresponding solvent. Explanations for the applied abbreviated guest names can be found in the corresponding methods section. All values are given in kJ·mol-1.

| **Guest** | **Water** | | **Cyclohexane** | | **ΔGH2O->CH** | |
| --- | --- | --- | --- | --- | --- | --- |
|  | mean | +/- | mean | +/- | mean | +/- |
| 6 | 15.26 | 0.10 | 48.10 | 0.70 | -32.84 | 0.71 |
| 10 | 7.92 | 0.14 | 68.20 | 1.70 | -60.28 | 1.71 |
| 17 | 13.19 | 0.11 | 47.30 | 0.90 | -34.11 | 0.91 |
| Z-17 | 13.00 | 0.11 | 47.10 | 1.10 | -34.10 | 1.11 |
| 22 | 12.04 | 0.11 | 49.70 | 0.50 | -37.66 | 0.51 |
| 21 | 9.47 | 0.12 | 55.10 | 1.10 | -45.63 | 1.11 |
| 24 | 13.00 | 0.15 | 40.60 | 1.00 | -27.60 | 1.01 |

Supporting Table S 8: Summary of estimated free energy differences according to Fig. S18 (A) for different combinations of host and guest molecules forming a 1:1 complex solvated in water. Explanations for the applied abbreviated guest and host names can be found in the corresponding methods section. All values are given in kJ mol-1. The standard binding free energy was calculated as , where is given by the sum: . Values for the decoupling free energies in bulk water () were taken from Tab. S7. Uncertainties for and were estimated from the corresponding statistical uncertainties of , and according to standard error propagation rules.

| **Host** | **Guest** | **Guest ID** | **ΔGH0->1** | | **ΔGH1->2** | | **ΔGH2->3** | **ΔGH0->3** | | **ΔG0bind** | |
| --- | --- | --- | --- | --- | --- | --- | --- | --- | --- | --- | --- |
|  |  |  | mean | +/- | mean | +/- |  | mean | +/- | mean | +/- |
| αCD | GACE | 17 | 1.79 | 0.01 | 46.27 | 0.02 | -6.80 | 41.25 | 0.02 | -28.06 | 0.11 |
| αCD | NACE | Z-17 | 0.70 | 0.00 | 39.95 | 0.26 | -6.80 | 33.85 | 0.26 | -20.85 | 0.28 |
| αCD | AMB | 20 | 54.15 | 0.15 | -13.25 | 0.19 | -6.80 | 34.10 | 0.24 | -22.06 | 0.26 |
| αCD | HFL | 21 | 7.08 | 0.02 | 44.80 | 0.17 | -6.80 | 45.08 | 0.17 | -35.61 | 0.21 |
| βCD | GAC | 6 | 2.15 | 0.04 | 48.42 | 0.17 | -6.80 | 43.77 | 0.17 | -28.51 | 0.20 |
| βCD | GACE | 17 | 1.26 | 0.02 | 51.37 | 0.18 | -6.80 | 45.83 | 0.18 | -32.64 | 0.21 |
| βCD | NACE | Z-17 | 0.74 | 0.03 | 49.89 | 0.18 | -6.80 | 43.83 | 0.18 | -30.83 | 0.21 |
| βCD | C13P | 24 | 7.37 | 0.09 | 41.71 | 0.20 | -6.80 | 42.28 | 0.22 | -29.28 | 0.27 |
| βCD | AMB | 20 | 7.08 | 0.02 | 38.17 | 0.19 | -6.80 | 38.45 | 0.19 | -26.41 | 0.22 |
| βCD | HFL | 27 | 1.20 | 0.04 | 52.88 | 0.19 | -6.80 | 47.28 | 0.19 | -37.81 | 0.23 |
| βCD | GGL | 10 | 1.20 | 0.04 | 53.18 | 0.25 | -6.80 | 47.58 | 0.25 | -39.66 | 0.29 |
| γCD | GACE | 17 | 0.82 | 0.04 | 41.09 | 0.17 | -6.80 | 35.11 | 0.17 | -21.92 | 0.21 |
| γCD | NACE | Z-17 | 0.69 | 0.02 | 41.84 | 0.16 | -6.80 | 35.73 | 0.16 | -22.73 | 0.20 |
| γCD | AMB | 28 | 0.27 | 0.00 | 53.73 | 0.19 | -6.80 | 47.19 | 0.19 | -35.15 | 0.22 |
| γCD | HFL | 27 | 1.01 | 0.03 | 45.89 | 0.21 | -6.80 | 40.10 | 0.21 | -30.63 | 0.24 |
| 2HP-αCD | GACE | 17 | 2.30 | 0.06 | 46.40 | 0.27 | -6.80 | 41.90 | 0.27 | -28.71 | 0.29 |
| 2HP-αCD | NACE | Z-17 | 1.79 | 0.06 | 43.66 | 0.32 | -6.80 | 38.65 | 0.32 | -25.65 | 0.34 |
| 2HP-αCD | AMB | 28 | 47.32 | 0.03 | -10.47 | 0.20 | -6.80 | 30.05 | 0.20 | -18.01 | 0.23 |
| 2HP-αCD | HFL | 27 | 3.55 | 0.01 | 45.15 | 0.19 | -6.80 | 41.90 | 0.19 | -32.43 | 0.22 |
| 2HP-βCD | GAC | 6 | 1.27 | 0.03 | 56.67 | 0.21 | -6.80 | 51.14 | 0.21 | -35.88 | 0.23 |
| 2HP-βCD | GACE | 17 | 0.57 | 0.02 | 59.66 | 0.22 | -6.80 | 53.43 | 0.22 | -40.24 | 0.25 |
| 2HP-βCD | NACE | Z-17 | 2.65 | 0.04 | 59.99 | 0.26 | -6.80 | 55.84 | 0.26 | -42.84 | 0.29 |
| 2HP-βCD | C13P | 21 | 6.76 | 0.08 | 50.12 | 0.37 | -6.80 | 50.08 | 0.38 | -37.08 | 0.41 |
| 2HP-βCD | AMB | 28 | 9.35 | 0.02 | 45.61 | 0.40 | -6.80 | 48.16 | 0.40 | -36.12 | 0.42 |
| 2HP-βCD | HFL | 27 | 0.90 | 0.05 | 62.69 | 0.25 | -6.80 | 56.79 | 0.25 | -47.32 | 0.28 |
| 2HP-βCD | GGL | 10 | 2.07 | 0.01 | 63.78 | 0.32 | -6.80 | 59.05 | 0.32 | -51.13 | 0.35 |
| 2HP-γCD | GACE | 17 | 0.65 | 0.03 | 57.54 | 0.25 | -6.80 | 51.39 | 0.25 | -38.20 | 0.28 |
| 2HP-γCD | NACE | Z-17 | 0.45 | 0.02 | 57.19 | 0.25 | -6.80 | 50.84 | 0.25 | -37.84 | 0.27 |
| 2HP-γCD | AMB | 28 | 0.17 | 0.00 | 71.89 | 0.33 | -6.80 | 65.25 | 0.33 | -53.21 | 0.34 |
| 2HP-γCD | HFL | 27 | 1.08 | 0.03 | 64.15 | 0.34 | -6.80 | 58.43 | 0.34 | -48.96 | 0.36 |

# Materials

Chemicals

The chemicals used for syntheses, molecular biology and biochemical work have been purchased from Carl-Roth (Karlsruhe, DE), VWR (Pennsylvania, US), Sigma-Aldrich/ Merck (St. Louis, US), TCI Chemicals (Tokyo, JP), and Alfa-Aesar (Ward Hill, US). Cyclodextrins have been purchased from Wacker (Munich, DE).

Molecular biological kits

The molecular biological kits for DNA-purification (ZymoClean DNA Clean & Concentrator Kit), Agarose Gel-extraction (ZymoClean Gel DNA Recovery Kit) and plasmid isolation (Zyppy™Plasmid Miniprep Kit) were purchased from ZymoResearch (Irvine, US).

**Primers, Buffers & Media**

Lists of primers, buffers and media used in this work are given in Supporting Table S4-6

# General analytics

## Nuclear Magnetic Resonance

1H- und 13C-NMR spectra were recorded on a Bruker Avance 500 or 700 Spectrometer at 500.15 or 700.36 MHz for 1H- and 125.76 MHz for 13C. The chemical shifts dare referred to tetramethylsilane (=TMS) in ppm set to 0. All substances were dissolved in CDCl3 and recorded at room temperature.

## Gas chromatography (GC)

GC-MS analyses were performed using an Agilent GC 7820A equipped with a CTC Pal-Sampler and a mass spectrometer MSD 5977B and a HP-5MS capillary column (Agilent, 30 m x 250 µm x 0.25 µm) and helium as carrier gas. Injections (1 µL) were performed in split mode. Relative conversions were calculated directly from GC-MS spectra by integration-quotient of substrates and products. GC-FID analyses were performed using a Shimadzu GC-2010 Plus equipped with an auto injector and DB-5 capillary column (Agilent, 30 m x 250 µm x 0.25 µm) and hydrogen as carrier gas. Chiral GC analyses were performed on a Shimadzu GC-2010 Plus equipped with a CP ChiraSil-Dex CB capillary column (Agilent, 25 m x 250 µm x 0.25 µm) and HP chiral 20B (Agilent, 30 m x 320 µm x 0.25 µm) and hydrogen as carrier gas. Injections (1 µL) were performed in split mode.

## Circular dichroism

The specific optical rotations were measured on a Perkin Elmer Polarimeter 241. Therefore, the substance was dissolved in CHCl3, and the specific rotation was determined with a sodium and a mercury spectral lamp.

# General Methods

## Plasmid isolation

Isolation of the plasmid proceeded following to the standard protocol of Zyppy™Plasmid Miniprep Kit by ZymoResearch. For the photometric determination of the plasmid DNA concentration, 2 μL were measured on a Nanodrop 1000 (Agilent, Santa Clara, US) at a wavelength of 260 nm**.**

## Site-saturation/-directed mutagenesis

The gene encoding for AacSHC, or variants based on these genes were cloned into a pET-22b(+) vector system (Merck, Darmstadt, Germany). SacI and NdeI were used as restriction sites. Cloning followed the standard protocol of New England Biolabs Phusion High Fidelity DNA Polymerase.

**Site-saturation libraries** were generated by using the “22c-trick” method22 PCR products were digested with 1 µL DpnI for 2-4 h at 37 °C, purified by agarose gel electrophoresis and ligated into the pET22b(+) vector by Gibson assembly.23 Afterwards the plasmids were transformed via heat-shock method (see below). **Single-point mutated variants** were directly transformed after DpnI digest without further purification.

## Plasmid transformation via heat-shock method

Chemically competent cells based on rubidium chloride24 were produced for the transformation of the plasmid DNA. The transformation was carried out at 4 °C. For site saturation libraries 3 µL (5 µL for single-point mutations) of the purified (crude) PCR product was added to 25 µL XL1-blue competent cells and incubated for 30 min on ice, followed by a heat shock at 42 °C for 105 s with subsequent ice cooling for 3 min. After adding 500 µL of LB medium, the cells were incubated for 40min at 37 ° C and used for inoculation of a 5 mL LB medium (Ampicillin, cend = 100 µg/mL) pre-culture overnight. Single-point variants were plated on petri dishes and grown colonies were picked and grown in 5 mL LB medium. After isolation of the plasmid, sequencing for quality control was performed. Subsequently, transformation into 50 µL BL21(DE3) was performed using the heat shock method. After regeneration 150 µL were streaked out on an agar plate (Ampicillin, cend = 100 µg/mL) and incubated at 37 °C overnight. For quality control the plasmid was isolated from another 150 µL and sent for sequencing. For site-directed mutants the PCR product was digested with DpnI overnight and afterwards transformed into XL1-blue competent cells. After regeneration 300 µL were streaked out on an agar plate for single clone picking.

## Expression of SHC in Erlenmeyer flasks

Expression cultures were inoculated with 5 mL of the pre-culture into 500 mL of T-DAB autoinduction medium (Ampicillin, cend = 100 µg/mL) with lactose as the inductor. The cultures were incubated for 20 h at 37 °C, 180 rpm and harvested afterwards (8000 rpm, 30 min). The resulting pellets were frozen at ‑80 °C overnight and lyophilized afterwards for storage. Alternatively, the cell pellets were directly used for biotransformations or thermolysis purification.

## Expression of SHC libraries in 96-DW plates

Individual colonies were picked from generated agar plates and cultivated in 500 µL LB medium (Ampicillin, cend = 100 µg/ml) for 18-20 h at 37 °C, 800 rpm. Expression cultures were inoculated with 10 µL of the pre-culture into 1 mL of T-DAB autoinduction medium (Ampicillin, cend = 100 µg/mL) with lactose as the inductor. The cultures were incubated for 20 h at 37 °C, 800 rpm and harvested afterwards (4000 x g, 20 min).

## Expression in 24 DW-plates

Individual colonies were picked from generated agar plates and cultivated in 2 mL LB medium (Ampicillin, cend = 100 µg/mL) for 18-20 h at 37 °C, 180 rpm. Expression cultures were inoculated with 40 µL of the pre-culture into 4 mL of T-DAB autoinduction medium (Ampicillin, cend = 100 µg/mL) with lactose as the inductor. The cultures were incubated for 20 h at 37 °C, 600 rpm and harvested afterwards (4000 x g, 20 min).

**Lyophilization protocol**

Freshly harvested *E. coli* cells were transferred to petri dishes and frozen at –80°C overnight. On the following day the frozen pellets were quickly transferred to *Christ alpha 2-4 LD plus* lyophilizer and lyophilized at –80 °C at 0.0001 atm for one. The resulting lyophilized whole cells were mortared gently and stored in 50 mL Falcon tubes at room temperature.

## Thermolysis purification25,26

Lyophilized cells (10 mg) were resuspended in 1 mL *Lysis buffer* and incubated for 30 min at 70 °C. The cell suspension was centrifuged (14000 x g, 1 min) and the supernatant was discarded. As the enzyme is membrane-bound, 1 mL *CHAPS buffer* was added to extract it from the cell pellet by shaking at room temperature for 1-2 d, 600 rpm. After subsequent centrifugation (14000 x g, 1 min) the supernatant containing the SHC (*Aac* or *Tel*) was transferred to a new tube followed by SDS-PAGE analysis and determination of enzyme concentration by using the *Nanodrop 1000*(Agilent, Santa Clara, US). Therefore the “Protein A280” mode was chosen with MW = 71439 Da and molar extinction coefficient ε = 185180 as protein specific data for *Aac*SHC and MW =. 72668 and ε = 189230 for *Tel*SHC.

## SDS-PAGE

After expression or purification 15 µL of the cell suspension (10 µL of the enzyme preparation) was mixed with 5 µL (2 µL) SDS loading buffer (Expedeon) and heated to 95 °C for 10 min. Afterwards 10 µl of the preparation was loaded on the pre-prepared SDS-PAGE (Expedeon) and ran for 70 min at 110V. For exemplary SDS-PAGE see refs. 7 and 10.

## Analytical biotransformations in GC screw-cap-vials

10 mg/ml lyophilized cells were resuspended in water, water supplemented with cyclodextrins or buffer or both. 495 µL of the cell suspension were transferred to GC screw-cap-vials and 5 μL of a substrate/DMSO stock (cend, substrate = 1 mM, unless otherwise noted in the reaction conditions) were added to start the reactions. Reactions were shaken at 30 °C or 50 °C for 20 h, depending on the substrate (see Fig 2). Reactions were stopped by adding 600 μL CH:EtOAc (1:1), vortexing and shaking for 5 min. After centrifugation (4000 rpm, 5 min) the organic phase was analyzed via GC-MS equipped with a PAL-Sampler directly from the two-phase system. Quantification was done by GC-FID and dodecane as internal standard.

## Screening of *Aac*SHC libraries via GC-MS

Harvested pellets were resuspended in 396 µL H2O and transferred to another 96-DW plate equipped with 1.2 mL glass inlets. Afterwards 4 µL substrate/DMSO stock solution (substrate cend = 1 mM) was added directly into the cell suspension, the plates were sealed and shaken for 20 h at 30 or 50 °C, 600 rpm. To stop the reaction 600 µL ethyl acetate/o-xylene (1:1) was added and the mixture was inverted for 10 min and incubated for 30 min. The plates were centrifuged (4000 x g, 5 min), sealed using polypropylene-sealings and a GC-MS equipped with a PAL-Sampler was used to inject directly from the organic phase. Quantification (GC conversion) was done directly from the Total Ion Count chromatogram by quotient AREAproduct/ (AREAsubstrate+AREAproduct)*100. In total 90 variants (6 control wells) per plate were screened. Promising variants were rescreened by expression in 24 DW-plates.

## Verification of promising hits

Promising candidates from the 96-DW screening were taken for inoculation of a 5 mL LB pre-culture. Afterwards the plasmids were isolated and transformed for single colony picking. The single colonies were expressed in 24 DW-plates and after harvesting, the OD600 was set to 10 in *dd*H2O. 495 μL were transferred to a 2 mL screw cap vial and 1 mM (5 µL) substrate was added as DMSO stock solution (cDMSO = 1%). The reactions were carried out at least in technical duplicates as analytical biotransformations. Reactions were carried out at 50 °C and 600 rpm for 24 h. Reactions were stopped by adding CH:EtOAc (1:1) and inversion of the suspension. After two extractions, the resulting organic phase was measured directly over GC-MS or FID. Quantification was done by dodecane is internal standard.

## Determination of turnover frequency and total turnover *in vivo*

For the determination of the whole cell turnover frequency (molproduct/molenzyme*h-1) and total turnover (molproduct/molenzyme), the SHC content of 10 mgCDW of the lyophilized batch was determined *via* Thermolysis protocol. The concentrations were determined in triplicates and full extraction was followed by SDS-PAGE.

## Fluorescence microscopy

Samples for Fluorenscence microscopy were prepared as follows: 1 mgCDW lyophilized and 4.5 mgCWW freshly prepared *E. coli* cells were fixed using 100 µl 4% paraformaldehyde in PBS solution. In order to wash the cells, the mixture was centrifuged (12.000 x g, 30 sec), the supernatant was discarded, and 1 mL of PBS solution was added. The cells were resuspended and centrifuged (12.000 x g, 30 sec) again. The supernatant was discarded, and the resulting pellet was resuspended on 100 µl sterile H2O. Afterwards 5 µl of the washed samples were struck out on a glass plate (Thermo Scientific) marked with 5 µl DAPI (Sigma-Aldrich) and SYTOXTM 4-64 (Thermo Scientific) and visualized using Fluorescence microscope (ZEISS Axiovert 200 equipped with a AxioCam HRm) with filters: Fs01 365 ± 12 nm and Fs09 470 ± 40 nm. Pictures were edited with ImageJ. The resulting pictures are presented in Fig. 3 and S10.

# Computational methods

## Docking simulations

Docking studies were performed using YASARA,6 which uses Autodock and VINA algorithms for the calculation of defined ligand-receptor interaction. Homolog SHC models of *Tel* and *Zmo*1 were generated by RoseTTaFold.13 *In silico* mutations of SHCs were introduced by changing the specific amino acid in the sequence based, which homology structure was modeled by RoseTTaFold. The most plausible and lowest energy model was used for visualization.

## Free energy calculations

## Molecular model

Native (αCD, βCD, γCD) and hydroxypropyl-cyclodextrins (2HP-αCD, 2HP-βCD, 2HP-γCD) were modelled with the GROMOS-compatible force field 53A6GLYC27, which is based on the GROMOS 53A6 force field28 and includes modified torsional-angle parameters for hexopyranoses. In the context of pure carbohydrate systems, the force field 53A6 is equivalent to 53A528 as well as recent modifications referred to as 54A729,30 and 54A831 and nearly identical to the set 45A432. The only minor difference between 45A4 and 53A6 force fields was a change in the repulsive coefficient of the Lennard-Jones interactions between atom type OA (used for all sugar oxygen atoms in these two force fields) and nonpolar carbon atoms (intermolecular or intramolecular beyond third covalent neighbors)33. Molecular models for all guest molecules except ambroxide were generated manually by transferring parameters from similar molecules in the GROMOS building block library30. For ambroxide (**22**) an initial topology was obtained from the automated topology builder34. This topology was adapted manually by replacing tailor-made covalent force field parameters by similar ones from the standard types of the 54A8 set. Moreover, the partial charges were adapted to be consistent with the other molecules. GROMOS topologies of all molecules are provided in Data Repository of the University of Stuttgart (INSERT LINK UPON ACCEPTANCE). The simple point charge (SPC) model35 was used to describe the solvent water. The membrane was not modelled explicitly but instead mimicked by bulk cyclohexane based on the good agreement between calculated free energies for transferring amino acid side chains from water into the center of a lipid bilayer and the experimental water to cyclohexane transfer free energy.36 Previous work using the force fields mentioned above indicated good agreement with experimentally determined structural properties for the native cyclodextrins37 while the binding free energy for different organic molecules including alcohols, ketones and ethers were overestimated by 5 to 10 kJ/mol.38–40 However, in the present work the difference between two free energies for transferring a guest molecule from water into a hydrophobic environment is relevant. This difference benefits from error compensation because also the transfer free energy of the guest molecule from water into cyclohexane is likely to be overestimated by a similar amount as indicated from comparison between simulated and reported thermophysical properties for neryl acetone (***Z*-17**) (enthalpy of vaporization, vapor pressure and aqueous solubility).

## Simulation Details

All simulations were conducted with the GROMACS 2016.4 program41 patched to the free-energy library PLUMED 2.4.242 for restraints definition. Each system was solvated with ∼1450 water molecules in an orthorhombic box of approximate dimensions 3.6 x 3.6 x 3.6 nm3. Production simulations were run at isothermal-isobaric conditions at 300 K and ambient pressure, with temperature control using a Nosé-Hoover thermostat43,44 (friction constant ) and a Parrinello-Rahman barostat45 (coupling constant ) for pressure control. A Verlet-buffered neighbor list46 which was updated every 40 steps, was applied for the treatment of short-range electrostatic and van der Waals interactions with potentials shifted to zero at 1.4 nm. The latter were modeled by the Lennard-Jones potential. Analytic dispersion corrections were applied for energy and pressure calculation. Long-range electrostatic interactions were treated with the smooth particle-mesh Ewald (PME) method47 using a real-space cut-off of 1.4 nm with a cubic splines interpolation scheme and a grid spacing of 0.12 nm. The center of mass (COM) translation of the computational box was removed every 1000 steps. All bond lengths as well water bond angles were constrained using the LINCS algorithm.48

## Double Decoupling

Following the double decoupling methodology (DDM), the standard binding free energy for a guest bound to a host molecule (here in the form of a solvated 1:1 complex) is calculated as:49

with

(see Fig. S18 (A)). is equivalent to the transfer free energy from bulk water to the cyclodextrin (CD)-based host (). corresponds to the free energy contribution for the application of a distance restraint between the COM of the fully interacting and bound guest and the COM of cyclodextrin in order to prevent the guest from leaving the host’s binding pocket once it is decoupled. This distance restraint (harmonic flat-bottom potential with force constant and threshold parameter ) was activated prior to the decoupling of the guest by gradually increasing the value of from 0 (unrestrained bound guest) to the final value within a sequence of 8 discrete steps with 20 ns per step. The free energy contribution for removing this distance restraint again from the decoupled i.e. non-interacting guest is given by . This pure entropic contribution can be calculated analytically and accounts for the transfer of the decoupled guest from the effective volume to the standard state volume and therefore represents the standard state correction for the calculation of :50

The effective volume accessible to the decoupled restrained guest is given by the integral:

where the integration variable denotes the radial host-guest-COM-COM distance. Numerical evaluation of the integral using the parameters given above, yields . Results for the decoupling free energies and for all simulated systems are reported in Fig. S18 (B) and tables Tab. S7 and S8.

For bulk simulations, a single guest molecule immersed in a bath of solvent (water or cyclohexane) molecules was considered, while for the host-guest complexes, a single guest bound to a single solvated host molecule (1:1 complex) was simulated. The scaling of the non-bonded interactions between the guest and its environment was controlled via a coupling parameter λ, such that λ = 0 and λ = 1 represents the fully interacting and fully decoupled guest, respectively, while retaining the intramolecular interactions. The decoupling was conducted in a sequence of 20 discrete steps, using simulation times of 20 ns per λ-state. In the applied perturbation scheme, electrostatic interactions were deactivated first within 5 steps, followed by the deactivation of the Lennard-Jones interactions. To avoid numerical problems close to the end states, soft-core (sc) potentials were used with parameters αsc = 0.5, σsc = 0.3 and a power for the soft-core scaling function of psc = 1.41 For enhanced sampling, including the possibility of sampling different orientations of the guest inside the binding pose, Hamiltonian replica exchange (HRE)51,52 was applied, with attempted exchanges of the Hamiltonians of neighboring λ-states every 1000 steps. All free energy changes (decoupling, activation of distance restraint) were estimated from the sampled potential energy differences between all λ-states using the MBAR estimator53 as implemented in a freely available Python program.54 For selected systems, we also conducted complementary umbrella sampling (US) simulations combined with HRE among adjacent umbrella windows (denoted as HRE-US), and estimated from the resulting one-dimensional free energy profile as done previously.55 In all cases, results from HRE-US and DDM were found to be in good agreement (data not shown).

# Preparative scale biotransformations using lyophilized *E. coli* cells harboring the *Aac*SHC variants.

**
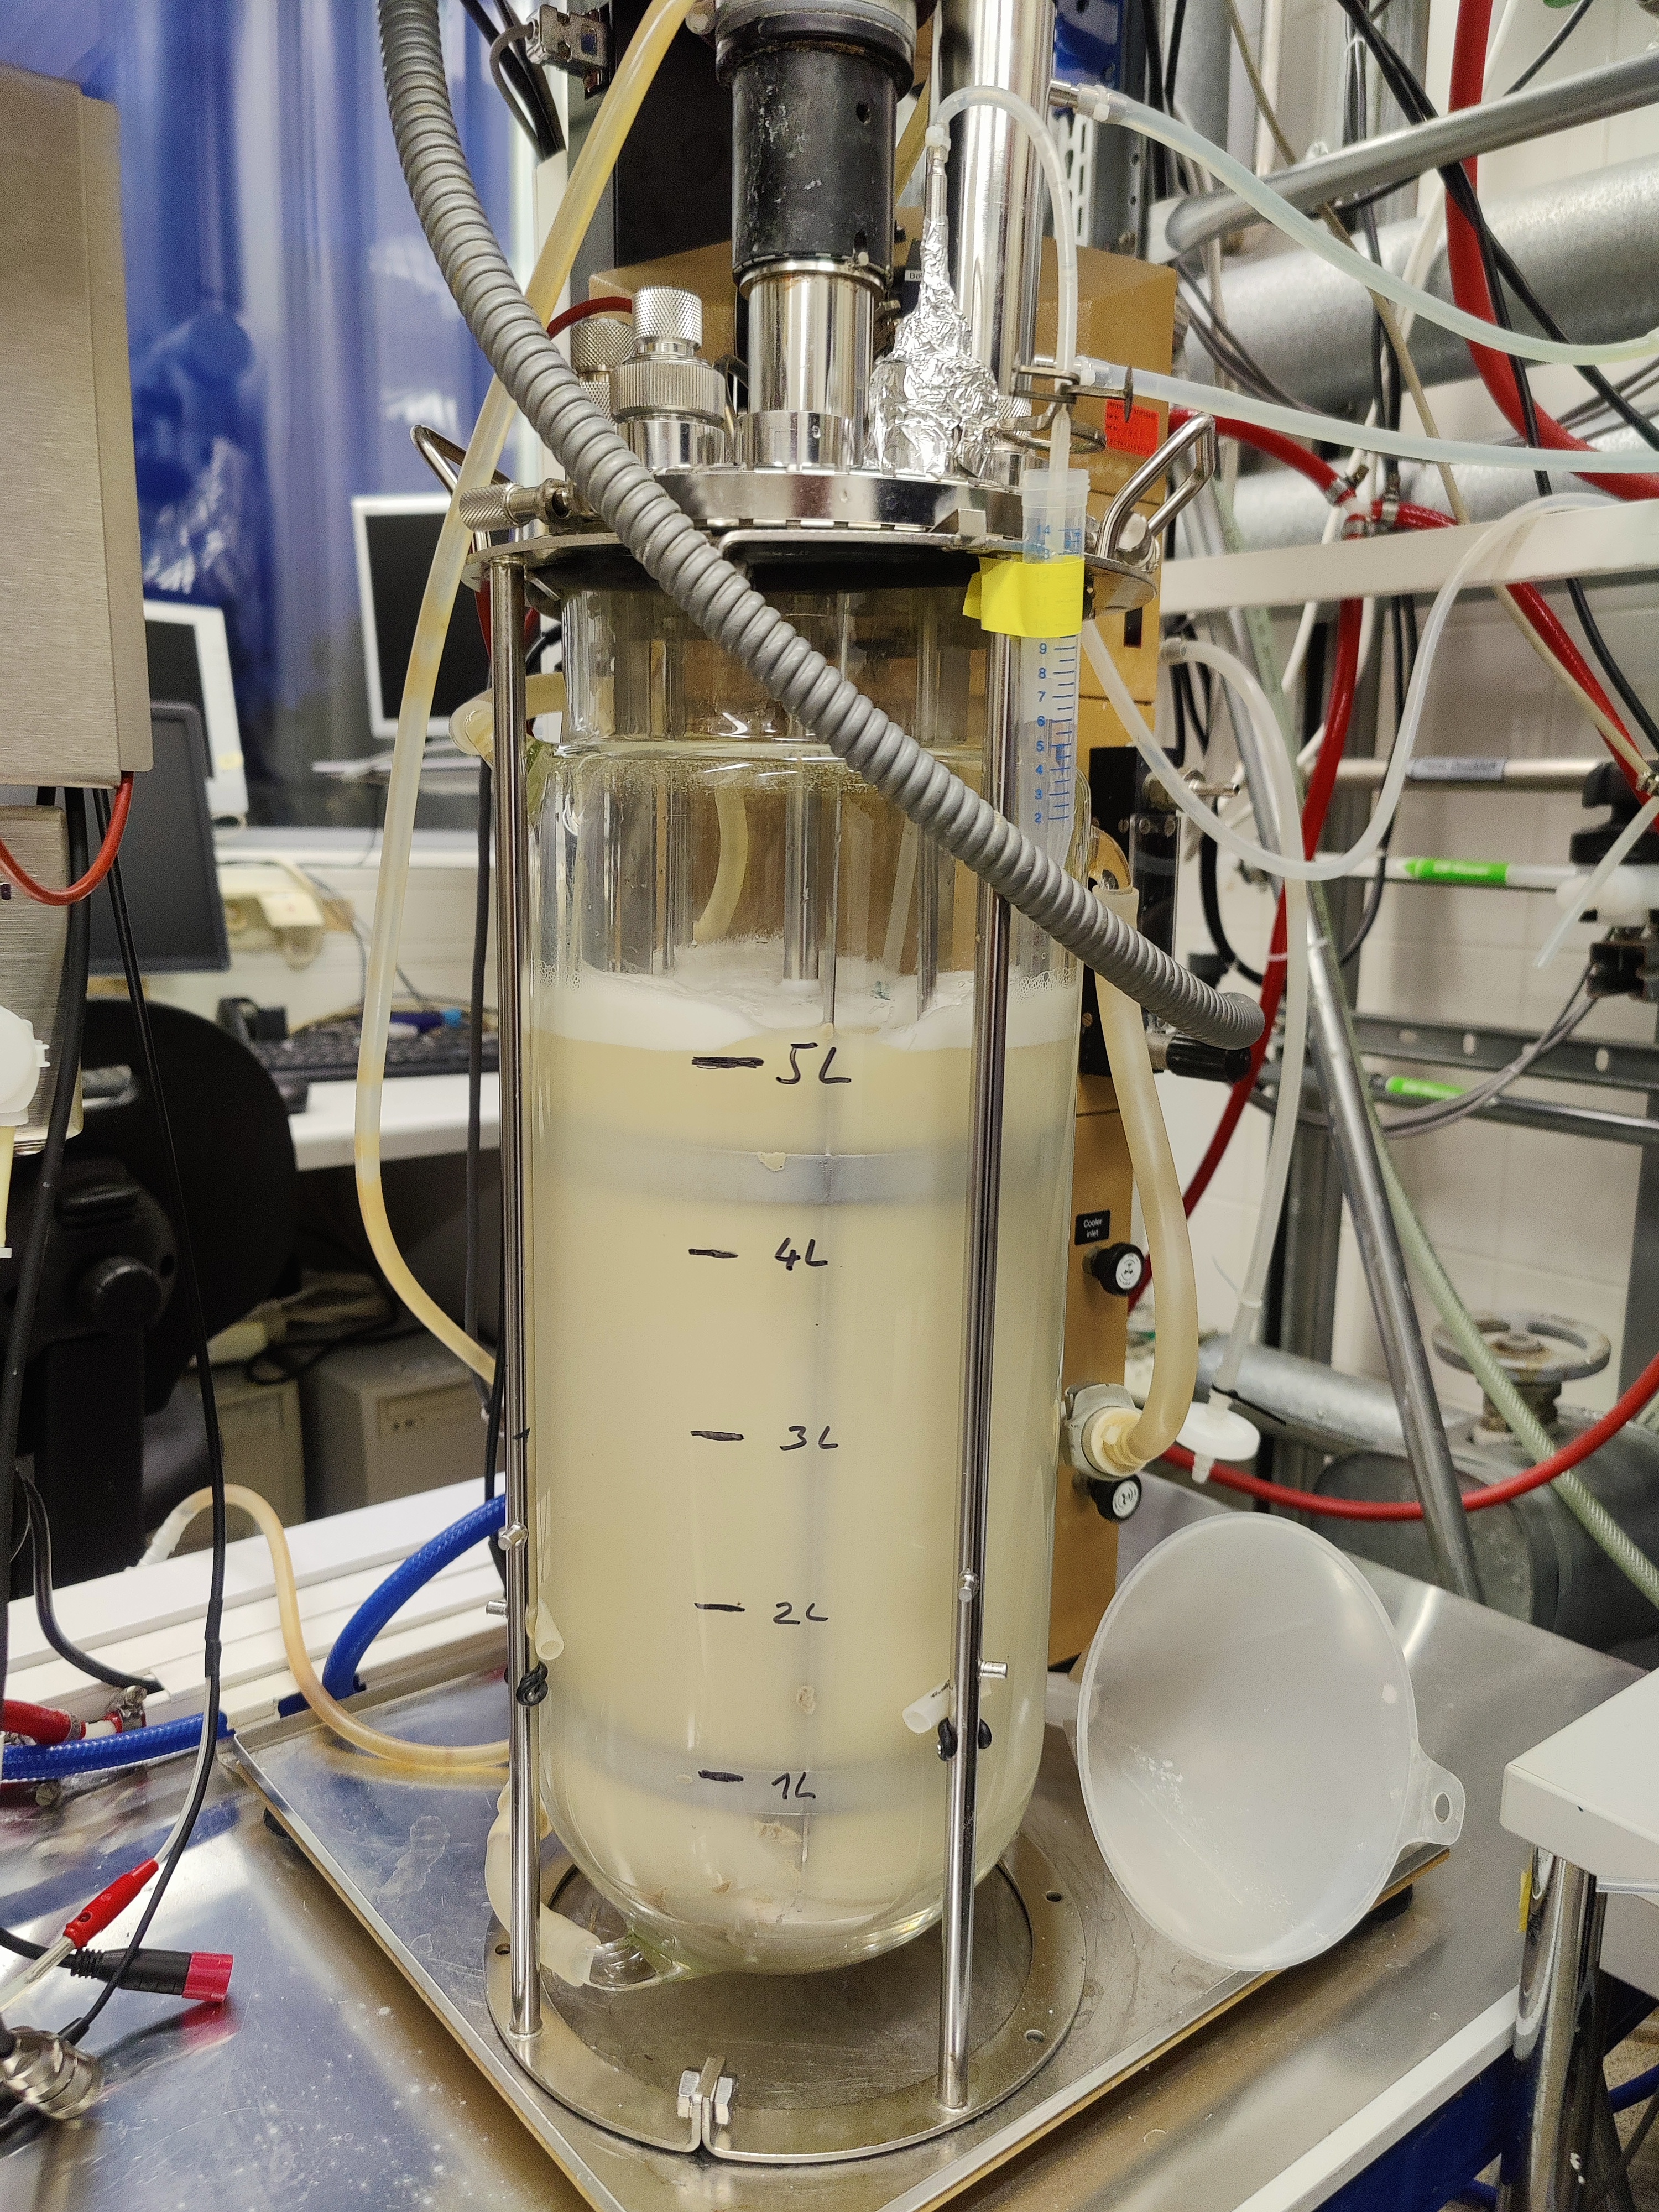
Reactor conditions:** To an Infors HT 5L equipped with Infors AG CH-4103 were added 50 gCDW, 5 L *dd*H2O, 25 g substrate **17** and 70 g of 2-hydroxypropyl-β-cyclodextrin. The reactor was warmed to 30 °C and the reaction was stirred at 100 rpm for 84 days. 100 µL samples were taken and extracted to measure reaction progress. For reaction progress see Fig. 3 in the main text. The reaction was extracted with ethyl acetate by overlaying and slowly stirring the cells/organic solvent mixture, to avoid phase mixture. The organic phase was dried over Mg2SO4 and purified via silica flash column (10:1, cyclohexane : ethyl acetate). Product **18** was obtained as colorless oil 22.4 g (115 mmol, 89.6%).

**General procedure of preparative scale biotransformation**.

After the product selective *Aac*SHC variant was identified, it was produced in *E. coli* in large scale (6-12 Erlenmeyer flasks) following the protocol described above. The resulting cell pellets were lyophilized afterwards, and the enzyme concentration was determined via the thermolysis protocol (see above). The reaction mixture contained a given amount of cells, the given amount of substrate, and optionally a given amount of 2-HPCD or citrate buffer. The reactions were performed in closed 100 mL or 1L Schott-flasks in an INFORS-HT incubator at 180 rpm for the given time. After the reaction was finished (GC-control) the cell suspension was overlayed with 50 mL or 500 mL cyclohexane:ethyl acetate (1:1) and stirred slowly to avoid mixing of the phases for 24 h. The organic phase was dried over MgSO4, reduced, and the crude products were analyzed via GC prior to column chromatography (20:1 cyclohexane:ethyl acetate). GC yield is given below the reaction arrows and was determined by [areaproduct]:[areasubstrate+areaproduct]. A comprehensive summary of the reaction conditions and yields can be found in Supporting Table S3. If not Asterisks mean no determination via chiral GC but suggesting the chiral due to the inherent ability of the SHC to produce only one enantiomer facilitated by the strongly confined active site.56

## 6 with G600R to cyclogeranyl acetate hydrate (7)

Product X was obtained as colorless oil. C12H22O3 **1H-NMR** (**CDCl3**, **500 MHz**): δ (ppm)0.86 (s, 3H), 1.02 (s, 3H), 1.22 (s, 3H), 1.33-1.78 (m, 7H), 2.06 (s, 3H), 4.32-4.33 (d, J = 2.9 Hz, 2H). **13C-NMR (CDCl3, 125 MHz):** δ (ppm)13.17 (1C), 19.02 (1C), 20.03(1C), 25.89 (2C), 33.12 (1C), 40.78 (1C), 41.37 (1C), 53.78 (1C), 62.51 (1C), 71.70 (1C), 169.98 (1C). The data is consistent with the literature.16

## 17 with variant G600M to *trans*-chromene (18)

Product was obtained as a colorless oil. C13H22O**1H-NMR (CDCl3, 500 MHz):** δ (ppm) 0.81 (s, 3H), 0.91 (s, 3H) 1.17 (s, 3H), 1.21-1.29 (m, 1H), 1.4-1.6 (m, 5H), 1.68 (s, 3H), 1.72-1.94 (m, 3H), 4.4-4.5 (m, 1H). **13C-NMR (CDCl3, 125 MHz):** δ (ppm) 19.07 (1C), 19.21 (1C), 19.82 (1C), 20.51 (1C), 20.77 (1C) 30.31 (1C), 32.25 (1C), 39.99 (1C), 41.65 (1C), 48. 37 (1C), 76.48 (1C), 94.97 (1C), 147.97 (1C). The data is consistent with the literature.57

## Z-17 with variant G600M to *cis*-chromene (23)

Product was obtained as a colorless oil. C13H22O **1H-NMR** (**CDCl3**, **500 MHz**): δ (ppm) 0.85 (s, 3H), 0.87 (s, 3H) 1.16 (s, 3H), 1.32-1.39 (m, 1H), 1.54 (s, 3H), 1.6-1.66 (m, 3H), 1.68 (s, 3H), 1.72-1.97 (m, 2H), 2.14-2.27 (m, 1H), 4.4-4.5 (d, J = 2.6 Hz, 1H). **13C-NMR** (**CDCl3**, **125 MHz**): δ (ppm) 18.13 (1C), 19.79 (1C), 20.54 (1C), 21.19 (1C), 26.50 (1C) 32.46 (1C), 33.73 (1C), 39.66 (1C), 41.99 (1C), 44.00 (1C), 74.71 (1C), 94.56 (1C), 148.76 (1C).

## 13 with variant F601D F605L to sclareoloxide (14)

Product was obtained as a yellow oil that solidified upon cooling. C18H30O **1H-NMR (CDCl3, 500 MHz):** δ (ppm) 0.81 (s, 3H), 0.813 (s, 3H) 0.88 (s, 3H), 1.15 (s, 3H), 1.24-1.51 (m, 8H), 1.56-1.63 (m, 3H), 1.68 (s, 3H), 1.69-1.87 (m, 2H), 1.69-19.6 (dt, *Jd* = 5.4, *Jt* = 3.0, 1H), 4.4 (dt, *Jd* = 1.9 Hz, *Jt* = 1.0 Hz, 1H) **13C-NMR (CDCl3, 125 MHz):** δ (ppm) 15.02 (1C), 18.27 (1C), 18.57 (1C), 19.76 (1C), 20.09 (1C), 20.46 (1C), 21.58 (1C), 33.17 (1C), 33.45 (1C), 36.69 (1C), 39.30 (1C), 41.14 (1C), 41.91 (1C), 52.44 (1C), 56.18 (2C), 94.61 (1C), 147.85 (1C) [α]D20 = 6.4 (c = 0.78 in CHCl3); Lit. = 4.9 (c = 1.3 in CHCl3). The data is consistent with the literature.58

## *Z*-17 with variant G600T L607A Y420F A306W D432T to γ-dihydroionone (24)

Product was obtained as a colorless oil. C13H22O **1H-NMR (CDCl3, 500 MHz):** δ (ppm) 0.87 (s, 3H), 0.92 (s, 3H) 1.10-1.30 (m, 2H), 1.42-1.62 (m, 3H), 1.66-1.70 (m, 1H), 1.76-1.83 (m, 1H), 1.97-2.04 (m, 2H), 2.11 (s, 3H), 2.22-2.45 (m, 2H), 4.50-4.51 (d, *J* = 1.03 Hz, 1H), 4.75-4.77 (m, 1H). **13C-NMR (CDCl3, 125 MHz):** δ (ppm) 20.31 (1C), 22.62 (1C), 23.52 (1C), 26.5 (1C), 28.3 (1C), 30.20 (1C), 32.00 (1C), 34.83 (1C), 42.38 (1C), 53.40 (1C), 109.5 (1C), 149.09 (1C), 209.52 (1C). The data is consistent with the literature.59 Stereoselectivity was determined in ref. 7.

## 8 with variant A306W to drimane diol (9)

Product was obtained as a white solid. C15H28O2 **1H-NMR** (**CDCl3**, **500 MHz**): δ (ppm) 0.79 (s, 6H), 0.88 (s, 3H), 0.95-0.98 (m, 1H), 1.07-1.29 (m, 4H), 1.35 (s, 3H), 1.42-1.57 (m, 4H), 1.63-1.67 (m, 2H), 1.87-1.90 (tt, *Jt* = 6.1 Hz, 1H), 3.91-3.93 (m, 2H). **13C-NMR (CDCl3, 125 MHz):** δ (ppm)16.05 (1C), 18.61 (1C), 20.19 (1C), 21.62 (1C), 24.30 (1C), 33.28 (1C), 33.56 (1C), 37.53 (1C), 39.99 (1C), 41.69 (1C), 44.51 (1C), 55.92 (1C), 60.52 (1C), 61.15 (1C), 75.14 (1C). The data is consistent with the literature.60 [α]D20 = +10.2 (c = 0.98 in CHCl3); Lit. = 5.5 (c = 0.5 in CHCl3).61 *assumed due to enantioselective cyclization of *E*,*E*-farnesol 8 to drimenol (see supporting chromatograms)

## 8 with variant Y420F G600L L36V to (+)-drimane diol (S1-9)

Product was obtained as a white solid. C15H28O2 **1H-NMR** (**CDCl3**, **500 MHz**): δ (ppm) 0.86 (s, 3H), 0.87 (s, 3H), 1.09-1.16 (td, *Jt* = 13 Hz, *Jd* = 1.3 Hz, 1H), 1.23 (s, 3H), 1.34 (s, 3H), 1.35 (s, 3H), 1.39-1.76 (m, 4H), 1.63-1.67 (m, 1H), 1.86-1.92 (m, 1H), 2.33-2.36 (t, J = 7.5 Hz, 2H), 4.05-4.14 (m, 2H). **13C-NMR (CDCl3, 125 MHz):** δ (ppm)14.13 (1C), 16.97 (1C), 18.42 (1C), 21.65 (1C), 22.69 (1C), 24.72 (1C), 33.36 (1C), 38.36 (1C), 40.04 (1C), 41.87 (1C), 42.88 (1C), 55.86 (1C), 58.31 (1C), 60.12 (1C), 74.16 (1C). The data is consistent with the literature.62 [α]D20 = +16.4 (c = 0.83 in CHCl3); Lit. = 12 (c = 1.05 in CHCl3).62

## 10 with variant G600N to labdane (12)

Product was obtained as a colorless highly viscous oil. C20H34O**1H-NMR** (**CDCl3**, **400 MHz**): δ (ppm) 0.76 (s, 3H), 0.82 (s, 3H), 0.84 (s, 3H), 0.80−1.09 (m, 2H), 1.56 (s, 3H), 1.69 (s, 3H), 1.02−2.01 (m, 11H), 2.13−2.31 (m, 1H), 4.09−4.20 (m, 2H), 5.10-5.13 (m, 1H), 5.40−5.43 (t, *J* = 7.2 Hz, 1H). **13C-NMR (CDCl3, 100 MHz):** δ (ppm)12.5 (1C), 15.9 (1C), 17.7 (1C), 20.1 (1C), 22.2 (1C), 23.7 (1C), 25.3 (1C), 30.9 (1C), 33.9 (1C), 37 (1C), 39.1 (1C), 42.0 (1C), 42.3 (1C), 50.1 (1C), 53.4 (1C), 59.4 (1C), 120.2 (1C), 121.3 (1C), 135.2 (1C), 141.4 (1C). The data is consistent with the literature.63 [α]D20 = +9.0 (c = 0.64 in CHCl3); Lit. = 5.0 (c = 0.5 in CHCl3).63

## 10 with variant F605W to *ent*-isocopalol (11)

Product was obtained as pale green solid. C20H34O**1H-NMR** (**CDCl3**, **400 MHz**): δ (ppm) 0.81 (s, 3H), 0.83 (s, 3H), 0.86 (s, 3H), 0.88 (s, 3H), 1.1-1.4 (m, 9H), 1.78 (m, 3H), 1.84-2.07 (m, 6H), 3.71-3.74 (dd, *J* = 6.3 Hz, 1H), 3.84-3.87 (dd, *J*= 6.3 Hz, 1H), 5.5-5.51 (m, 1H). **13C-NMR (CDCl3, 125 MHz):** δ (ppm)15.83 (1C), 15.84 (1C), 18.52 (1C), 18.75 (1C), 21.68 (1C), 21.81 (1C), 22.55 (1C), 33.14 (1C), 33.40 (1C), 36.24 (1C), 37.24 (1C), 39.93 (1C), 41.54 (1C), 41.91 (1C), 54.84 (1C), 56.25 (1C), 57.89 (1C), 60.89 (1C), 123.95 (1C), 132.65 (1C). The data is consistent with the literature.64 [α]D20 = –6.0 (c = 0.55 in CHCl3); Lit. = –10.1 (c = 0.42 in CHCl3).65

## 15 with variant F601D F605L to sclareol oxide acetate (16)

Product was obtained as pale colorless wax. C20H32O3 **1H-NMR** (**CDCl3**, **500 MHz**): δ (ppm) 0.82 (s, 3H), 0.84 (s, 3H) 0.88 (s, 3H), 0.91-0.98 (m, 2H), 1.13 (s,3H), 1.25-1.39 (m, 3H), 1.44-1.47 (m, 1H), 1.52-1.55 (m, 1H), 1.57-1.63 (m,1H), 1.68-174 (m, 2H), 2.19 (s, 3H), 2.26-2.32 (dd, *J* = 7.1 Hz, 1H), 3.69 (s, 3H). **13C-NMR (CDCl3, 125 MHz):** δ (ppm)14.89 (1C), 18.48 (1C), 19.43 (1C), 19.64 (1C), 20.38 (1C), 20.58 (1C), 21.54 (1C), 33.17 (1C), 33.42 (1C), 36.75 (1C), 39.21 (1C), 40.60 (1C), 41.85 (1C), 50.87 (1C), 51.62 (1C), 56.09 (1C), 78.35 (1C), 99.96 (1C), 163.14 (1C), 169.29 (1C). [α]D20 = 7.3 (c = 0.63 in CHCl3).

# Chemical synthesis

## Synthesis of *E*,*E*-keto ester (15)

The reaction was carried out under nitrogen atmosphere. A 60 % dispersion of NaH in mineral oil (210 mg, 5.25 mmol) was washed with hexane (3x1mL) and suspended in DMF (5mL). methyl acetoacetate(580 μL, 5.4 mmol was added dropwise. After 30 min, the resulting solution was treated with *E*,*E*-farnesyl bromide (0.5 g, 1.75 mmol) and stirred for 4 h. The reaction mixture was quenched with 5 mL of saturated NaHCO3, extracted with EtOAc (3 x 10 mL), and washed with H2O (4 x 5 mL). The combined organic layers were dried over MgSO4 and concentrated. Column chromatography (CH:EtOAc, 1:20) afforded a colorless oil of **15** (0.43 mL, 1.36 mmol, 78 %).

C20H32O3 **1H-NMR (CDCl3, 500 MHz):** δ (ppm) 1.58 (s, 3H), 1.60 (s, 3H), 1.62 (s, 3H), 1.67 (s, 3H), 1.94-1.99 (m, 4H), 2.03-2.07 (m, 4H), 2.22 (s, 3H), 2.54-2.57 (t, *J* = 7.5 Hz, 2H), 3.44-3.47 (t, *J* = 7.7 Hz, 1H), 3.72 (s, 3H), 5.02-5.08 (m, 3H). **13C-NMR (CDCl3, 125 MHz):** δ (ppm) 16.0 (1C), 16.1 (1C), 17.7 (1C), 25.7 (1C), 26.5 (1C), 26.7 (1C), 26.9 (1C), 29.2 (1C), 39.68 (1C), 39.71 (1C), 52.3 (1C), 59.6 (1C), 119.5 (1C), 123.8 (1C), 124.3 (1C), 131.3 (1C), 135.2 (1C), 138.6 (1C), 170.1 (1C), 203.1 (1C). The data is consistent with the literature.21

## Synthesis of ketone (P-1)


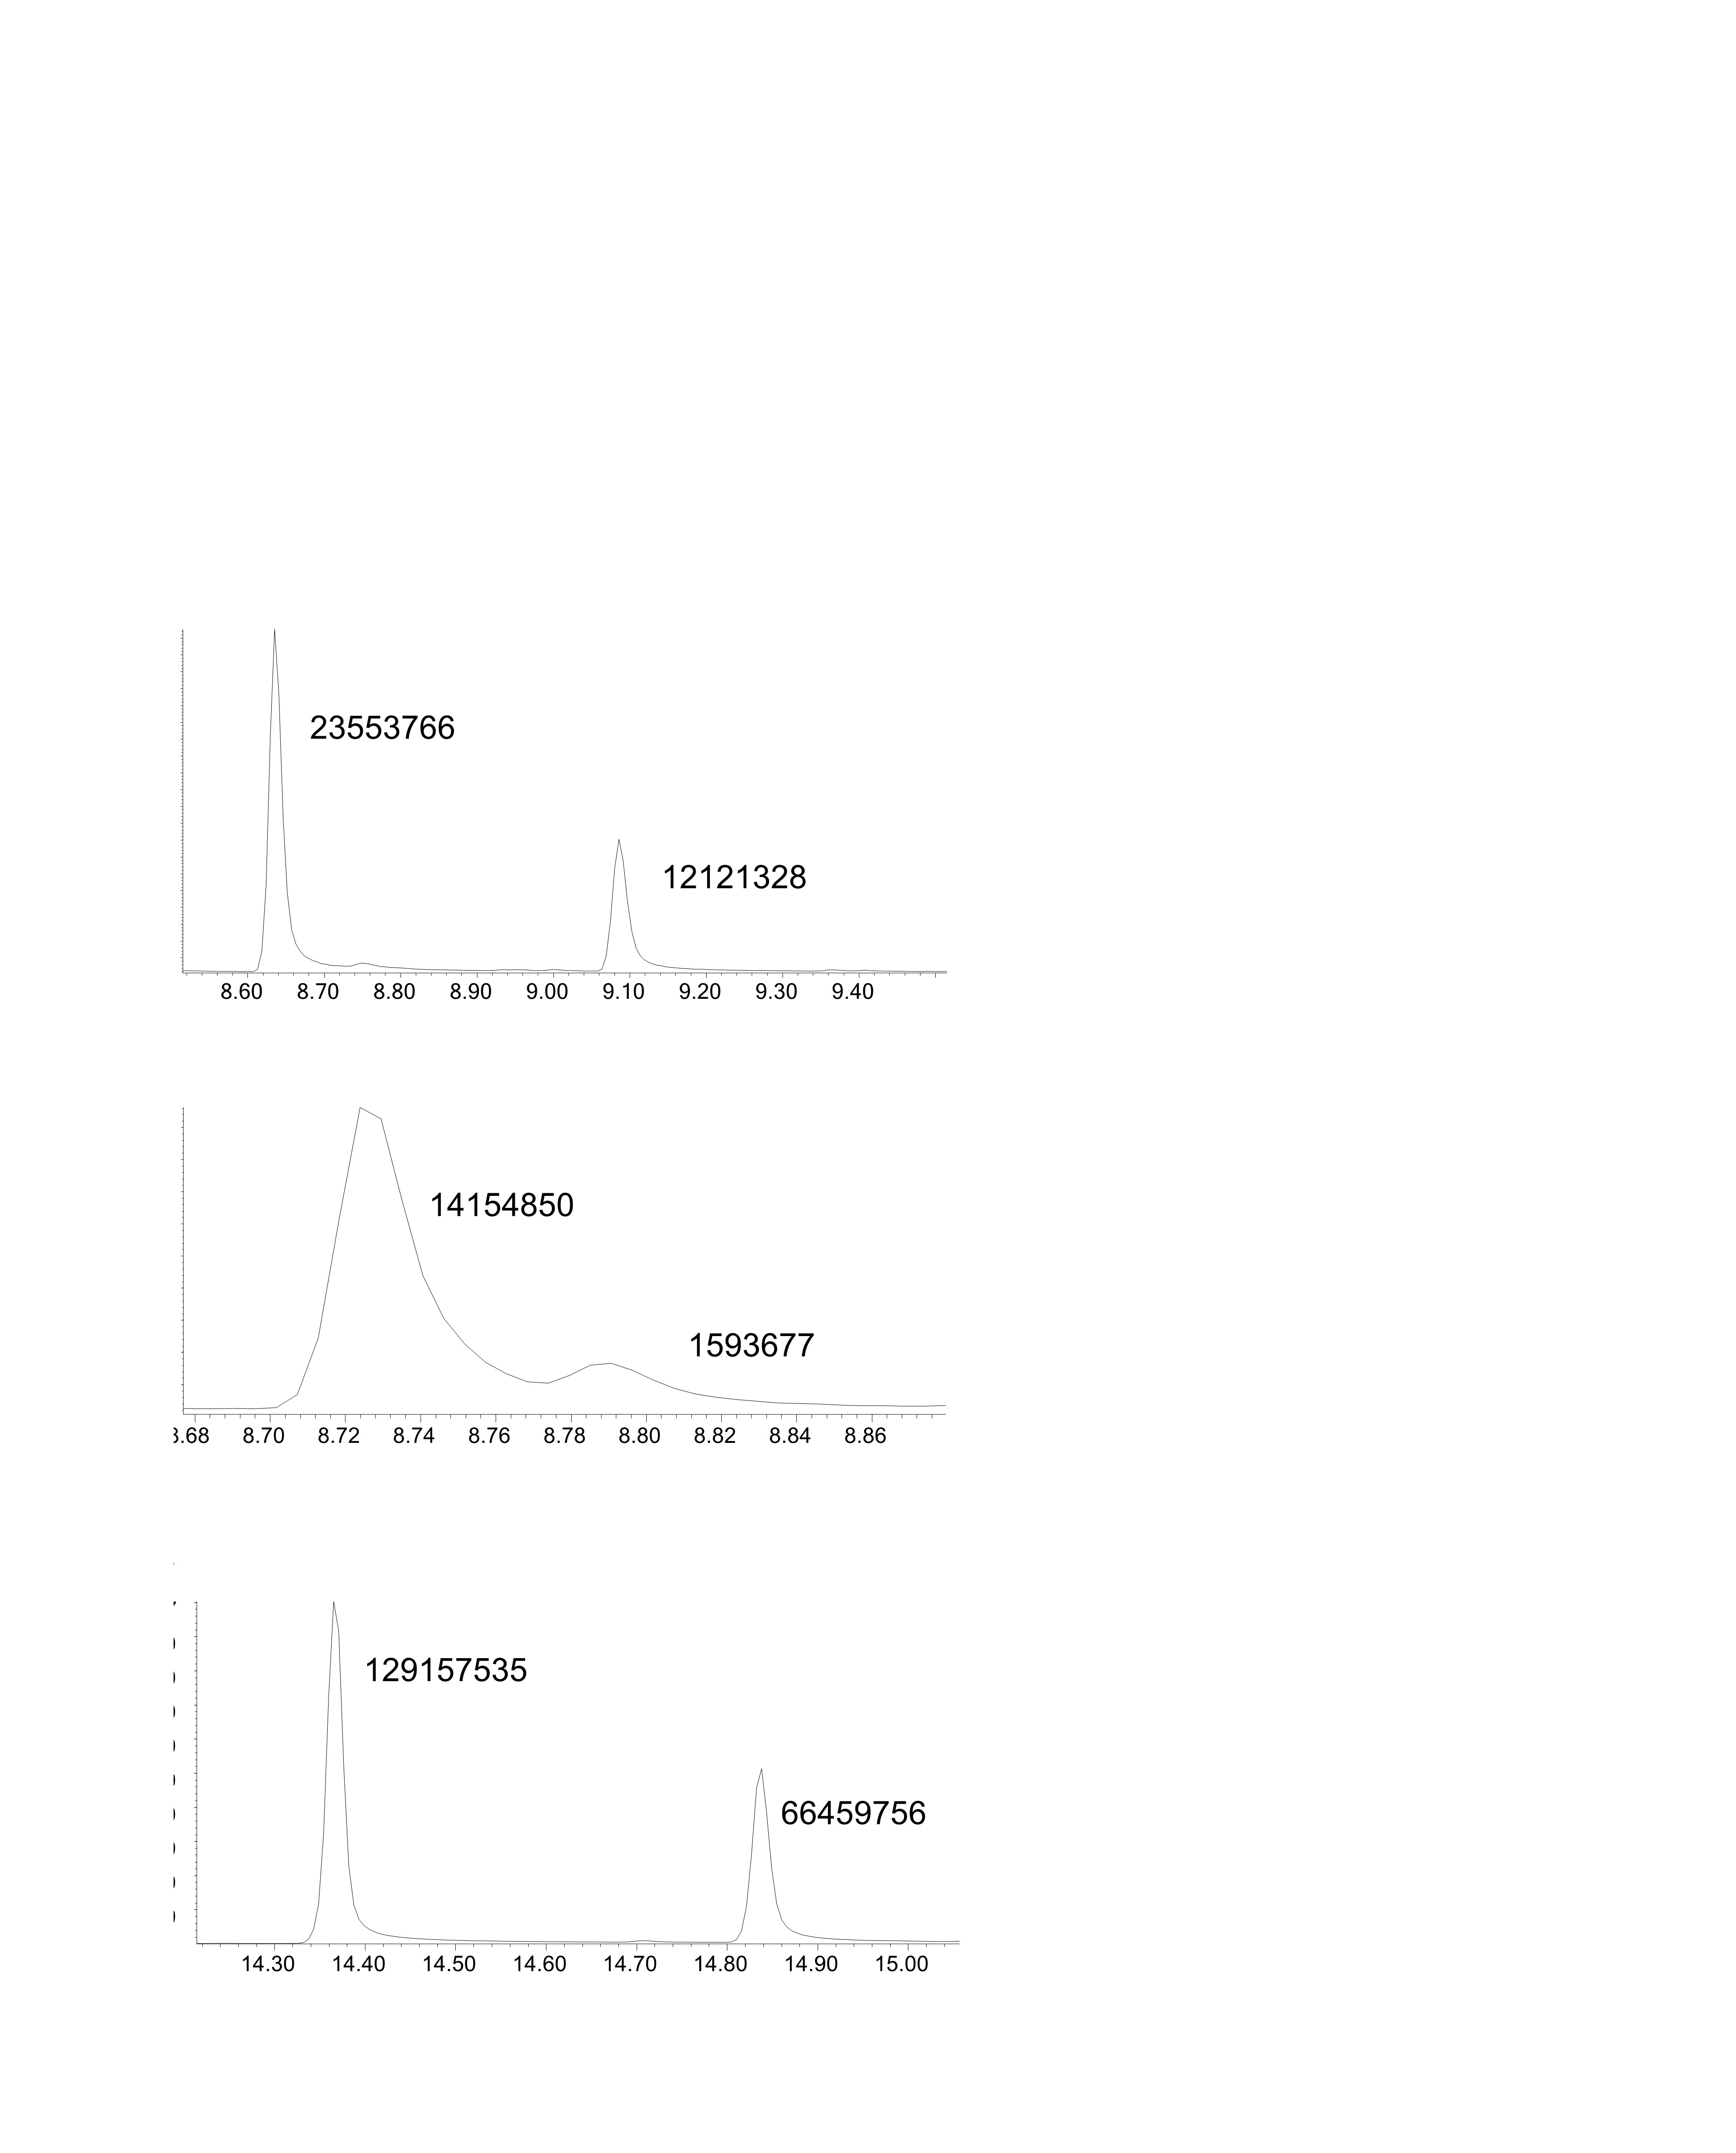


To a 10 mL glass vessel were added 5 mL buffer solution containing 1 mM NaI and 20 mM 2HPCD, was added 21.8 µL (19.4 mg, 0.1 mmol) *trans*-hexahydrochromene 18 and 38.7 µL of 30% H2O2 in H2O (0.5 mmol, 5 eq). The reaction mixture was shaken for 2 h at 37 °C before another portion of 38.7 µL of 30% H2O2 was added. After reaction completion determined via GC-MS (4 h total reaction time), the reaction was quenched with sat. Na2S2O3 and extracted with ethyl acetate. The organic phase was dried over Mg2SO4 and reduced under vacuo to afford a 3:2 diastereoisomeric mixture of P-1 as a colorless oil (20.4 mg, 0.0097 mmol, 97%). Reactions were monitored by taking 10 µL samples that were quenched with 10 µL sat. Na2S2O3, extracted with ethyl acetate and measured via GC-MS.

C13H22O2 **1H-NMR (CDCl3, 500 MHz) major diastereoisomer:** δ (ppm) 0.81 (s, 3H), 0.85 (s, 3H) 0.93 (s, 3H), 1.15 (s, 3H), 1.30-1.34 (m, 1H), 1.43-1.46 (m, 2H), 1.66-1.73 (m, 2H), 1.92-2.14 (m, 4H), 2.21 (s, 3H), 4.33-4.37 (dd, *Jd* = 5.3 Hz, *Jd* = 1.7 Hz, 1H). **13C-NMR (CDCl3, 125 MHz):** δ (ppm) 19.81 (1C), 20.35 (1C), 21.13 (1C), 26.79 (1C), 28.00 (1C) 32.65 (1C), 33.21 (1C), 38.62 (1C), 40.81 (1C), 55.66 (1C), 80.07 (1C), 82.62 (1C), 211.13 (1C).

## Synthesis of ketone (P-2)


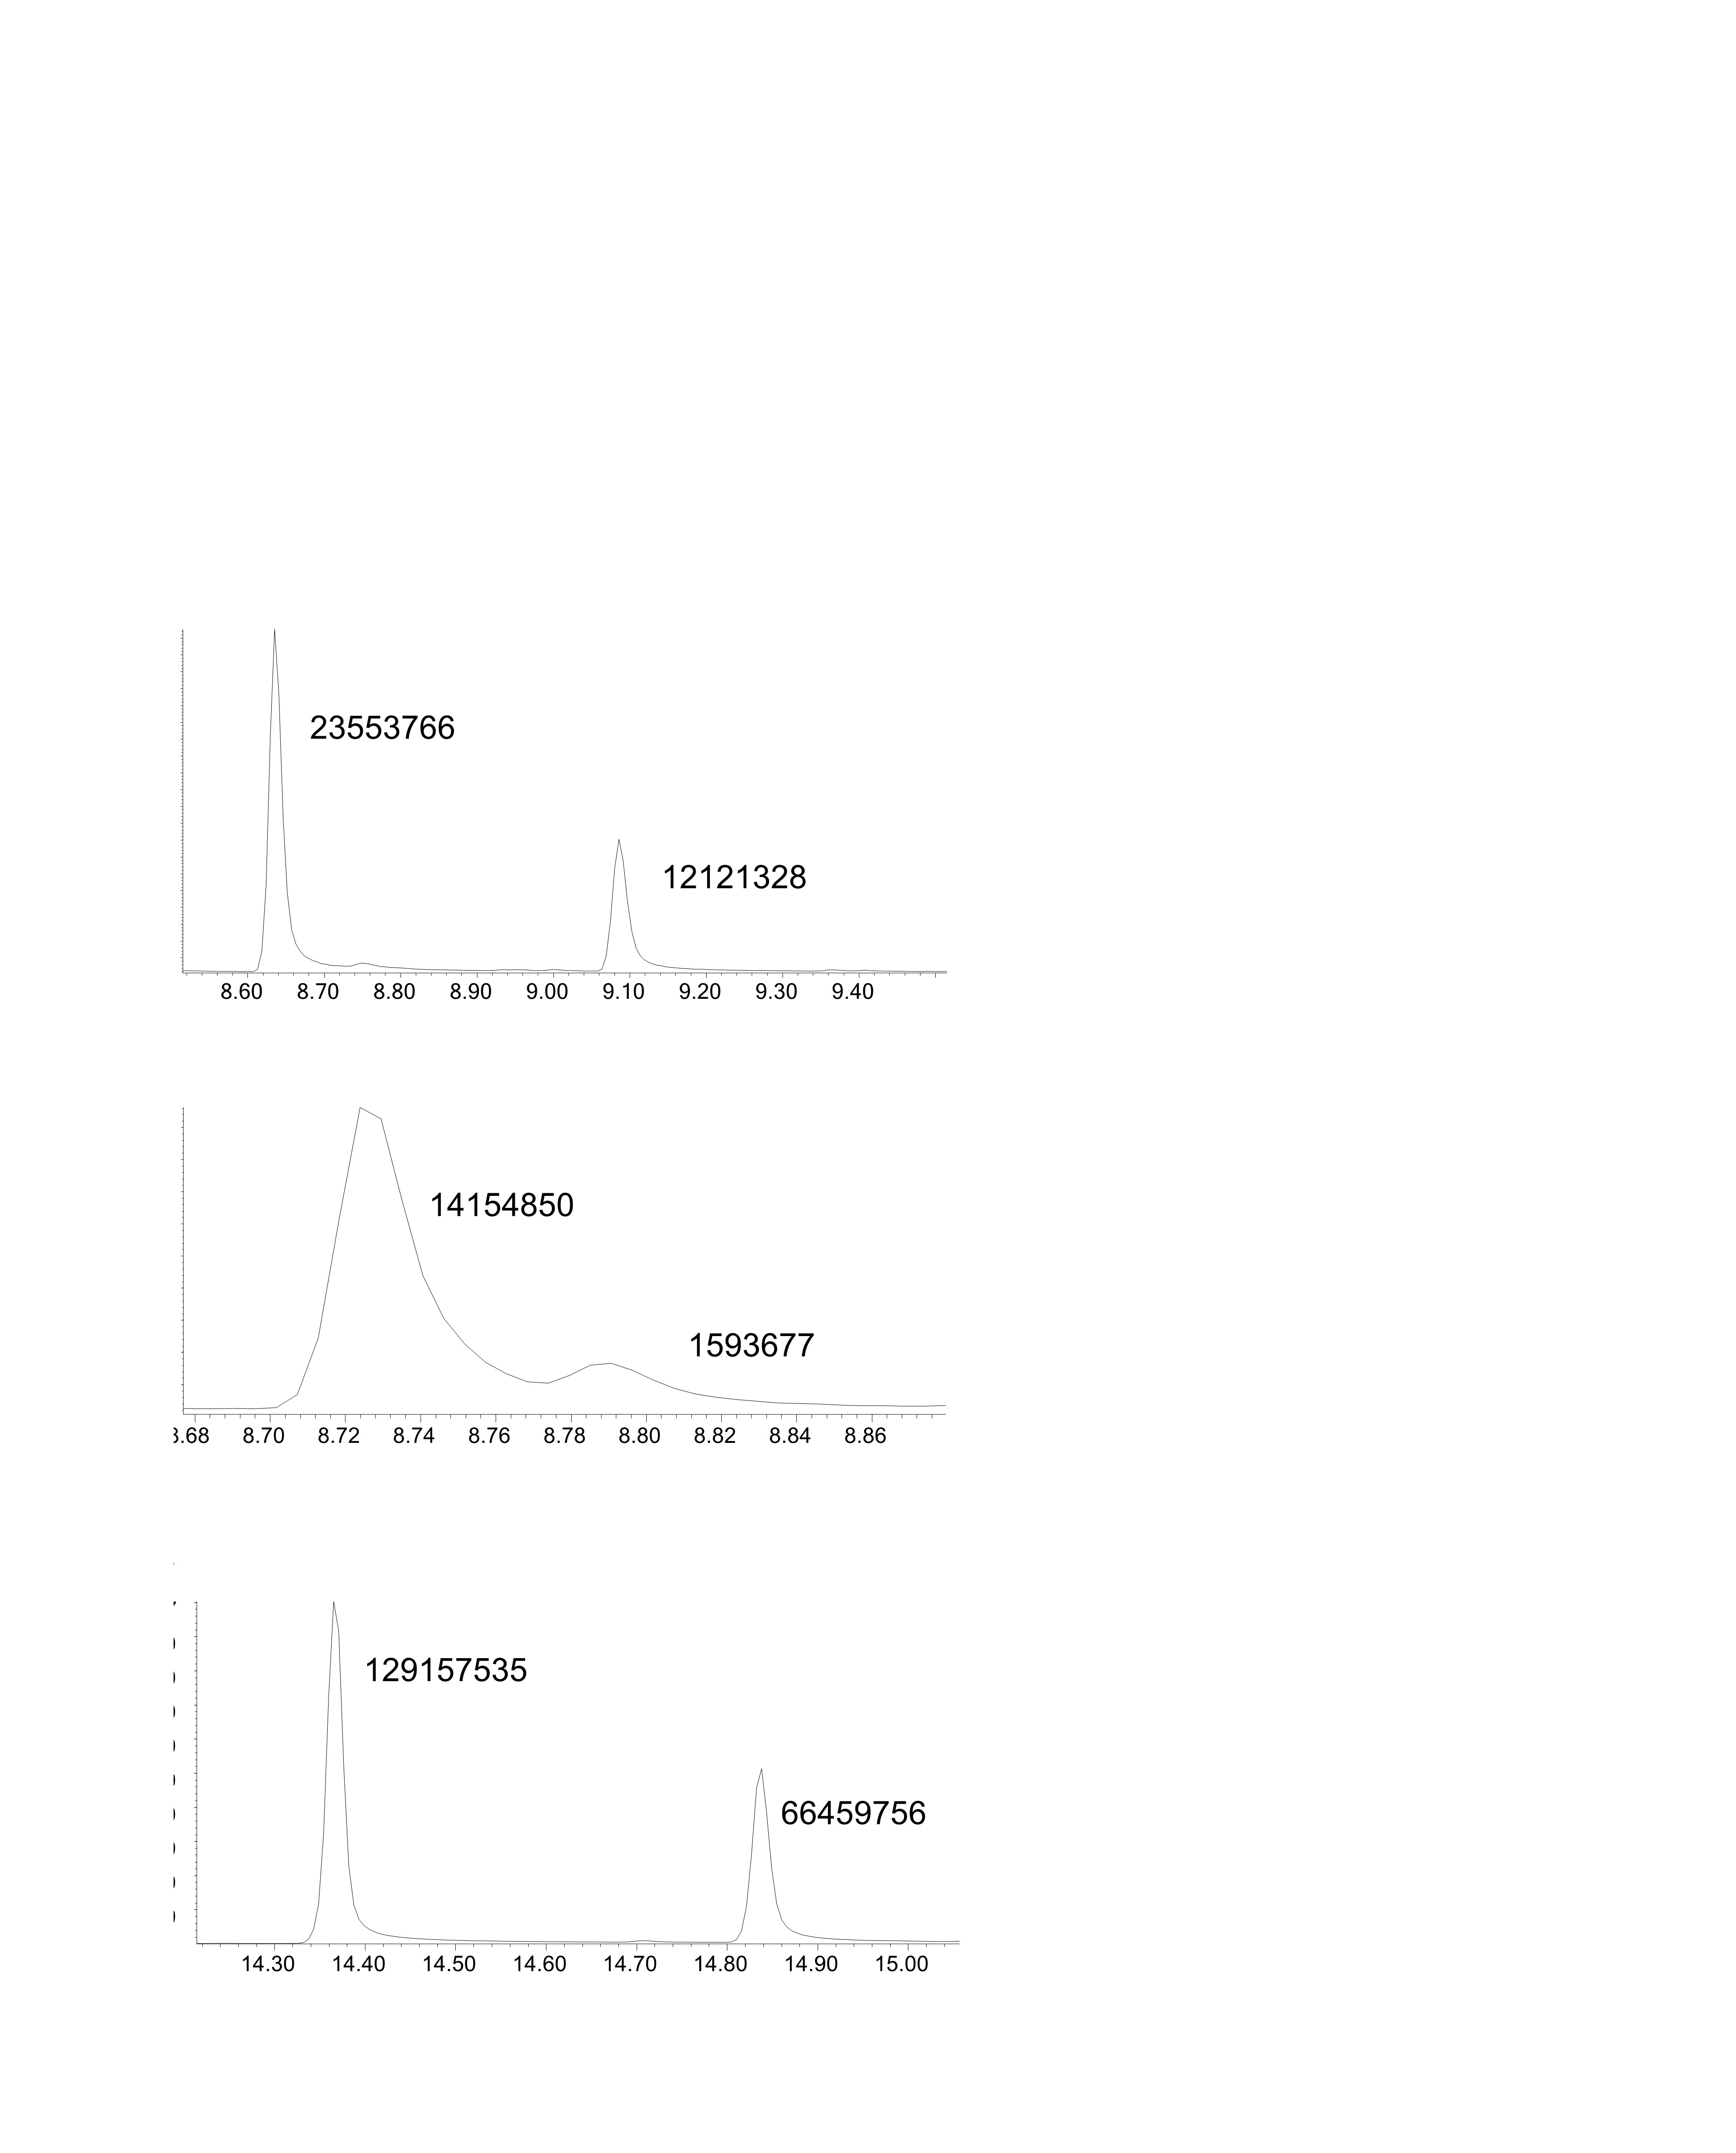


To a 1 mL glass vial were added 500 µL buffer solution containing 1 mM NaI and 20 mM 2HPCD, was added 2.18 µL (1.94 g, 0.01 mmol) *cis*-hexahydrochromene 23 and 3.87 µL of 30% H2O2 in H2O (0.05 mmol, 5 eq). The reaction mixture was shaken for 2 h at 37 °C before another portion of 3.87 µL of 30% H2O2 was added. After reaction completion determined via GC-MS (4 h total reaction time), the reaction was quenched with sat. Na2S2O3 and extracted with ethyl acetate. The organic phase was dried over Mg2SO4 and reduced under vacuo to afford a 9:1 diastereoisomeric mixture of P-2 as a colorless oil (1.9 mg, 0.009 mol, 90%).

C13H22O2 **1H-NMR (CDCl3, 700 MHz):** δ (ppm) 0.84 (s, 3H), 1.01 (s, 3H) 1.27-1.38 (m, 5H), 1.42 (s, 3H), 1.4-1.6 (m, 4H), 2.22 (s, 3H), 4.22-4.25 (dd, *Jd* = 4.8 Hz, *Jd* = 1.4 Hz, 1H). **13C-NMR (CDCl3, 176 MHz):** δ (ppm) 19.93 (1C), 25.51 (1C), 26.5 (1C), 27.28 (1C), 28.29 (2C) 30.64 (1C), 32.3 (1C), 33.93 (1C), 34.00 (1C), 51.9 (1C), 80.08 (1C), 212.9 (1C).

## Synthesis of ketone (P-3)


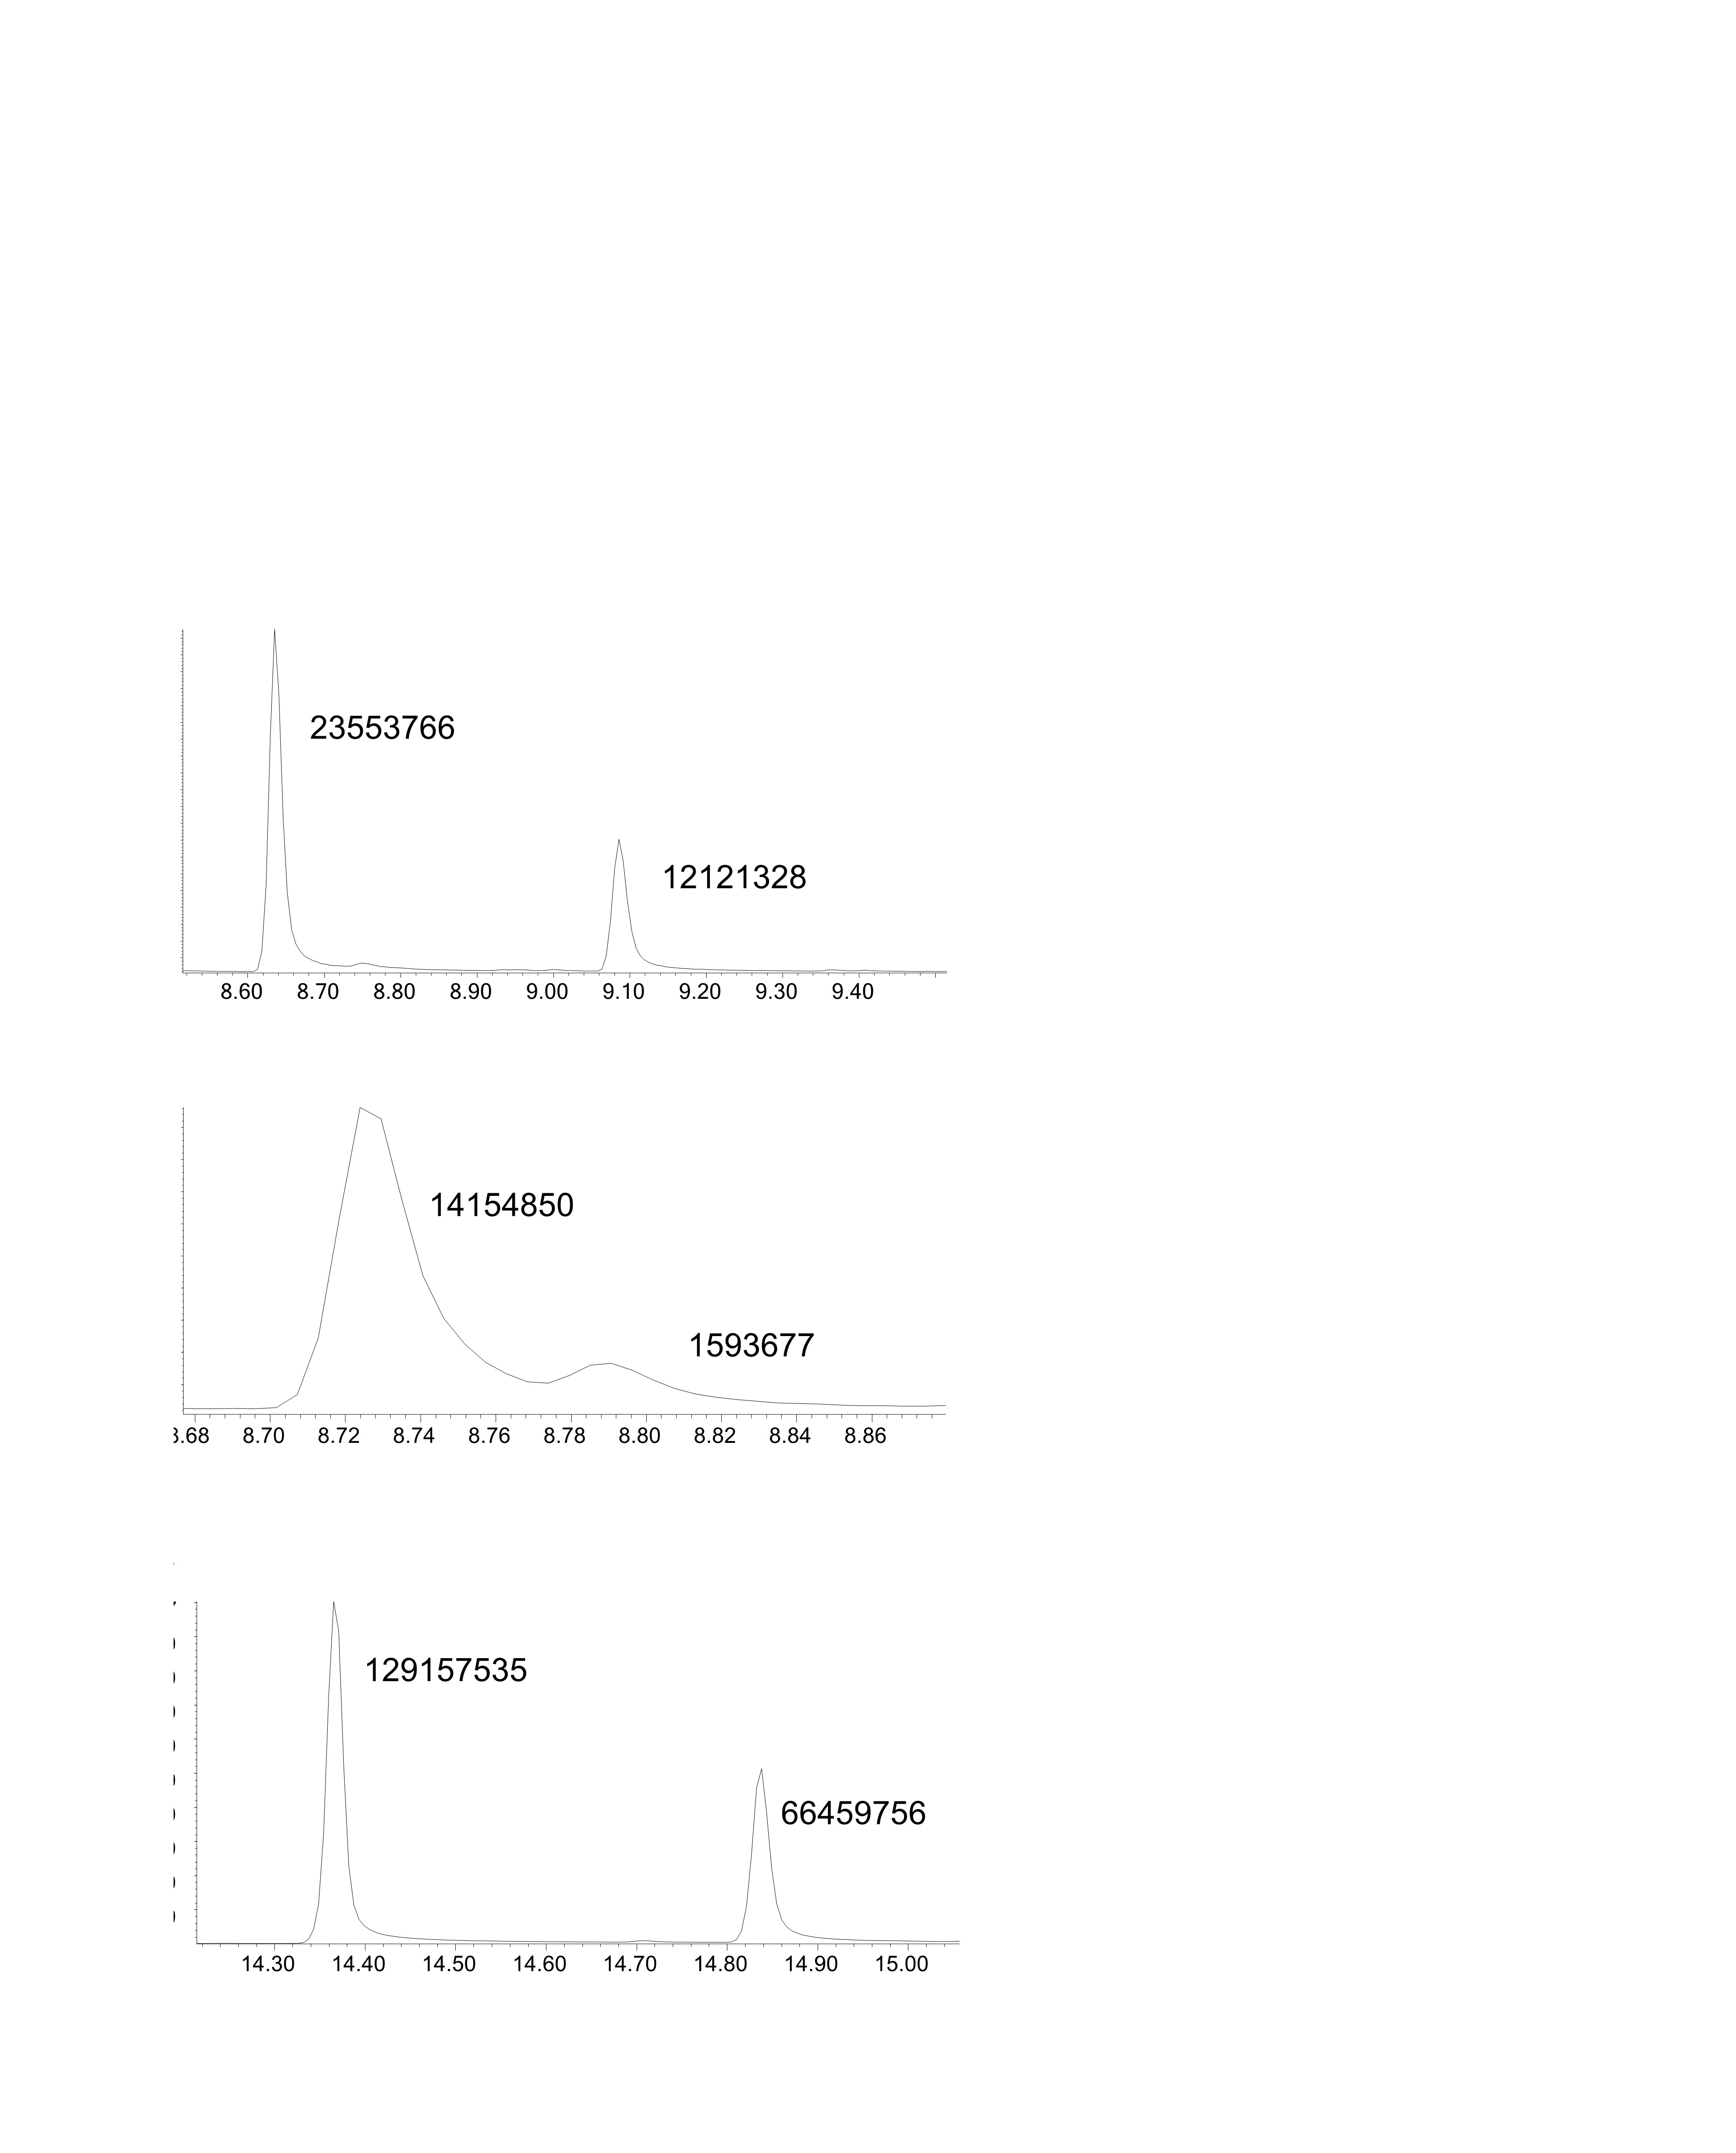


To a 10 mL glass vessel were added 5 mL buffer solution containing 1 mM NaI and 20 mM 2HPCD and 10% isopropanol, was added 26.2 mg (0.1 mmol) sclareoloxide 14 and 38.7 µL of 30% H2O2 in H2O (0.5 mmol, 5 eq). The reaction mixture was shaken for 2 h at 37 °C before another portion of 38.7 µL of 30% H2O2 was added. This step was repeated. After reaction completion determined via GC-MS (6 h of total reaction time), the reaction was quenched with sat. Na2S2O3 and extracted with ethyl acetate. The organic phase was dried over Mg2SO4 and reduced under vacuo to afford a 3:2 diastereoisomeric mixture of **P-3** as a colorless oil (25.3 mg, 0.0091 mmol, 91%).

C18H30O2 Characteristic signals of the major diastereoisomer. C18H30O2 **1H-NMR (CDCl3, 500 MHz):** δ (ppm) 2.21 (s, 3H) and 4.37-4.39 (dd, *Jd* = 5.15 Hz, *Jd* = 1.6 Hz, 1H). The data is consistent with the literature.15

## Synthesis of trans-tetrahydroactinidiolide (1) via P-1

To a 1 mL glass vial were added 500 µL ethyl acetate, 5.9 µL P-1 (5.26 mg, 0.025 mmol), 2.5 mg CALB and 9.7 µL of 30% H2O2 in H2O (0.13 mmol, 5 eq.) sequentially and the reaction mixture was shaken for 30 min at 50 °C. Afterwards another 9.7 µL of 30% H2O2 were added. After reaction completion determined via GC-MS (1 h total reaction time), the reaction was quenched with sat. Na2S2O3 and extracted with ethyl acetate. The organic phase was dried over Mg2SO4 and reduced under vacuo to afford trans-tetrahydroactinidiolide as a white solid (3.2 mg, 0.018 mol, 70%). Reactions were monitored by taking 10 µL samples that were quenched with 10 µL sat. Na2S2O3, extracted with ethyl acetate and measured via GC-MS.

C11H18O2 **1H-NMR (CDCl3, 500 MHz):** δ (ppm) 0.93 (s, 3H), 0.96 (s, 3H) 1.53 (s, 3H), 1.56-1.59 (m, 1H), 1.96-2.08 (m, 5H), 2.27-2.55 (m, 3H). **13C-NMR (CDCl3, 125 MHz):** δ (ppm) 19.94 (1C), 19.80 (1C), 20.46 (1C), 20.71 (1C), 22.69 (1C) 30.31 (1C), 24.69 (1C), 33.77 (1C), 40.08 (1C), 55.59 (1C), 86.54 (1C), 178.54 (1C). The data is consistent with the literature.66

## Synthesis of sclareolide (26) via Lipase/Iodine tandem protocol

Lugol’s iodine (KI/I2) was prepared by dissolving 1 g of I2 and 2 g of KI in 300 mL *dd*H2O (53 mM of which 47 mM is ‘iodide’ catalyst. To a 1 mL glass vial was added 500 µL ethyl acetate, 1.2 mg Lipase, 10 µL lugol’s iodine (1 mol-% iodide) and 6.6 mg sclareoloxide **14** (0.025 mmol, 50 mM). To this was added 9.7 µL of 30% H2O2 in H2O (0.13 mmol, 5 eq.) and the reaction was shaken at 50 °C for 3 h. After this time another 9.7 µL of 30% H2O2 in H2O (0.13 mmol) and the reaction was shaken at 50 °C for another 2 h. After reaction completion determined via GC-MS (5 h total reaction time), the reaction was quenched with sat. Na2S2O3 and extracted with ethyl acetate. The organic phase was dried over Mg2SO4 and reduced under vacuo to afford sclareolide X as a white solid (4 mg, 0.16 mmol, 64%). Reaction time can be shortened to 3 h by adding 50 wt-% CALB.

C16H26O2 **1H-NMR (CDCl3, 700 MHz):** δ (ppm) 0.84 (s, 3H), 0.88 (s, 3H), 0.91 (s, 3H), 1.05-1.07 (m, 2H), 1.19-1.20 (m, 1H), 1.33 (s, 3H), 1.35-1.45 (m, 4H), 1.64-1.71 (m, 2H), 1.87-1.89 (m, 1H), 1.95-1.98 (dd, *Jd* = 7.3 Hz, *Jd* = 3.3 Hz, 1H), 2.06-2.09 (m, 1H), 2.22-2.25 (dd, *Jd* = 7.5 Hz, *Jd* = 3.4 Hz, 1H ), 2.38-2.43 (m, 1H). **13C-NMR (CDCl3, 176 MHz):** δ (ppm) 15.07 (1C), 18.08 (1C), 20.55 (1C), 20.92 (1C), 21.57 (1C), 29.71 (1C), 33.17 (1C), 36.05 (1C), 38.69 (1C), 39.49 (1C), 42.16 (1C), 56.64 (1C), 59.11 (1C), 76.48 (1C), 86.42 (1C), 176.94 (1C). The data is consistent with the literature.67

## Synthesis of *cis*-tetrahydroactinidiolide (25) via Lipase/Iodine tandem protocol

To a 1 mL glass vial were added 500 µL ethyl acetate, 0.96 mg Lipase, 10 µL lugol’s iodine (1 mol-% iodide) and 5.5 µL cis-hexahydrochromene **23** (0.025 mmol). To this was added 9.7 µL of 30% H2O2 in H2O (0.13 mmol) and the reaction mixture was shaken for 3 h at 50 °C. After this time another 9.7 µL of 30% H2O2 (0.13 mmol) were added. After reaction completion determined via GC-MS (1 h total reaction time), the reaction was quenched with sat. Na2S2O3, extracted with ethyl acetate and 22 µL (0.026 mmol) mesitylene as an internal standard was added to determine the yield. (0.0086 mmol, 33%)

C11H18O2 **1H-NMR (CDCl3, 700 MHz):** characteristic methyl-signal at 0.962

## Synthesis of trans-tetrahydroactinidiolide (1) via Lipase/Iodine tandem protocol

To a 1 mL glass vial was added 500 µL ethyl acetate, 0.96 mg Lipase, 10 µL lugol’s iodine (1 mol-% iodide) and 5.5 µL trans-hexahydrochromene **18** (4.85 mg, 0.025 mmol, 50 mM). To this was added 9.7 µL of 30% H2O2 in H2O (0.13 mmol, 5 eq.) and the reaction was shaken at 50 °C for 3 h. Afterwards another 9.7 µL of 30% H2O2 in H2O (0.13 mmol) and the reaction was shaken at 50 °C for another 2 h. After reaction completion determined via GC-MS (5 h total reaction time), the reaction was quenched with sat. Na2S2O3 and extracted with ethyl acetate. The organic phase was dried over Mg2SO4 and reduced under vacuo to afford trans-tetrahydroactinidiolide **1** as a white solid (2.73 mg, 0.15 mmol, 60%). For NMR data see above.

## Synthesis of chromanone (3)

The reaction was carried out under nitrogen atmosphere. To a solution of **24** (50 mg, 0.26 mmol) and 2,6-hydroxyacetophenon (39 mg, 0.25 mmol) in dry THF (2 mL) and molecular sieves 4Å (400 mg), pyrrolodine (6.5 μL, 0.08 mmol) and butanoic acid (11.8 µL, 0.13 mmol) were added. After stirring at room temperature for 24 h, the reaction was extracted with methyl-tert-butyl ether (MTBE, 3x 5 mL). The organic phase was washed with 2N HCl (3x 5 mL) and brine (3x 5 mL), dried over Na2SO4 and concentrated in vacuo. Purification by flash chromatography (cyclohexane: MTBE, 95:5) afforded a 50:50 diastereomeric mixture of chromanone **3** (74 mg, 0.23 mmol, 90%).

C21H28O3 **1H-NMR (CDCl3, 500 MHz):** δ (ppm) 0.83 (s, 3H), 0.91 (s, 3H), 1.19-1.29 (m, 2H), 1.41-1.83 (m, 9H), 1.89-2.01 (m, 2H), 2.56-2.85 (m, 2H), 4.4 (m, 1H), 4.7 (m, 1H), 6.4 (d, *J* = 1.5 Hz, 1H), 6.45 (d, *J* = 1.5 Hz, 1H), 7.33 t, *J* = 9.0 Hz, 1H). **13C-NMR (CDCl3, 125 MHz):** δ (ppm) 18.87 (1C), 22.58 (1C), 22.85 (1C), 22.93 (1C), 27.33 (1C), 33.96 (1C), 37.03, (1C), 45.76 (1C), 46.03 (1C), 52.98 (1C), 79.91 (1C), 106.56 (1C), 106.81 (1C), 107.51 (1C), 108.31 (1C), 137.21 (1C), 147.67 (1C), 147.77 (1C), 158.96 (1C), 160.69 (1C), 197.51 (1C).

## Synthesis of carbonate (2)

The reaction was carried out under nitrogen atmosphere. To a solution of drimendiol **9** (30 mg, 0.125 mmol) in 1 mL dry THF was added potassium carbonate (34.27 mg, 0.248 mmol, 2 eq.) and the reaction mixture was stirred at 0 °C for 10 min. Next, carbonyl diimidazole (40.21 mg, 2 eq.) was added and the reaction was stirred for another 8 h at 0 °C. Upon completion (determined by GC-MS), the reaction was extracted with ethyl acetate, the organic phase was dried over MgSO4 and concentrated under vacuo. Purification by flash chromatography (20:1, cyclohexane:ethyl acetate) afforded **2** mixed 50:50 with acetate **S1-2** as a white solid (23 mg, 0.08 mmol, 66%). The acetate is presumably generated by unreacted carbonylmonoimidazole-drimenol adduct that reacts with ethyl acetate during quenching, which could potentially be circumvented by longer reaction times.

Dioxanone **2** C16H26O3 **1H-NMR (CDCl3, 500 MHz):** δ (ppm) 0.83 (s, 3H), 0.89 (s, 3H), 0.91 (s, 3H), 1.31-1.51 (m, 6H), 1.48 (s, 3H), 1.63-1.74 (m, 6H), 2.05 (m, 2H), 4.33-4.42 (m, 2H). **13C-NMR (CDCl3, 125 MHz):** δ (ppm) 15.44 (1C), 18.12 (1C), 19.52 (1C), 21.37 (1C), 21.72 (1C), 33.08 (1C), 33.31 (1C), 36.33 (1C), 39.00 (1C) 39.88 (1C), 41.53 (1C), 51.31 (1C), 55.81 (1C), 66.87 (1C), 82.17 (1C), 149.15 (1C).

Drimenol acetate **S1-2** C17H30O3 **1H-NMR (CDCl3, 500 MHz):** δ (ppm) 0.81 (s, 3H), 0.86 (s, 3H), 0.88 (s, 3H), 0.93-0.97 (m, 1H), 1.18 (s, 3H), 1.29-1.63 (m, 9H), 1.62-1.69 (m, 2H), 1.87-1.91 (dt, *Jd* = 6.4 Hz, *Jt*= 3.1 Hz, 1H), 2.05 (s, 3H), 4.23-4.37 (qd, *Jq* = 27.3 Hz, *Jd* = 2.4 Hz, 2H). **13C-NMR (CDCl3, 125 MHz):** δ (ppm) 15.81 (1C), 18.4 (1C), 20.3 (1C), 21.31 (1C), 21.50 (1C), 24.58 (1C), 33.19 (1C), 33.45 (1C), 38.08 (1C), 39.70 (1C), 41.71 (1C), 43.94 (1C), 55.70 (1C), 59.95 (1C) 62.57 (1C), 72.59 (1C), 171.34.

## Synthesis of α-pyrone meroterpenes (28) and (29)

The reaction is carried out under nitrogen atmosphere. A solution of LiHMDS (83.5 mg, 0.5 mmol) in THF (1 mL) was stirred at –78°C. To this was added a solution of a,ß-unsaturated ester **16** (40 mg, 0.125 mmol) in 3 mL of dry THF. The mixture was stirred for 25 min and then treated with nicotinoate (57 mg, 0.375 mmol) or benzoate (53.6 µL, 0.375 mmol). During the reaction, the mixture was allowed to warm up to room temperature to facilitate the intramolecular Aldol condensation. After 2 h the reaction mixture was quenched with H2O (15 mL) and extracted with EtOAc (3 x 20 mL). The combined organic layers were washed with brine (10 mL), dried over MgSO4 and purified by flash chromatography (CH:EtOAc, 20:1) to afford bright yellow **28** (31 mg, 0.08 mmol, 64%). For product **29**, 108 µL (0.125 mmol) mesitylene as an internal standard was added to determine the yield. (0.0086 mmol, 28%)

C25H31NO3 **1H-NMR (CDCl3, 500 MHz):** δ (ppm) 0.85 (s, 3H), 0.90 (s, 3H), 0.91 (s, 3H), 1.26 (s, 3H), 1.31-1.54 (m, 5H), 1.63-1.83 (m, 6H), 2.10-2.14 (dt, *Jd* = 8.5 Hz, *Jd* = 2.4 Hz, 1H), 2.18-2.27 (m, 1H), 2.5-2.57 (dd, *Jd* = 6.2 Hz, *Jt* = 3.4 Hz, 1H), 6.43 (s, 1H), 7.36-7.31 (m, 1H), 8.1 (dt, *Jd* = 4.4 Hz, *Jt* = 1.8 Hz, 1H), 8.65 (dd, *Jd* = 2.3 Hz, *Jd* = 0.7 Hz, 1H), 9.0 (d, *J* = 1 Hz, 1H). **13C-NMR (CDCl3, 125 MHz):** δ (ppm) 15.05 (1C), 17.22 (1C), 18.43 (1C), 19.67 (1C), 20.78 (1C), 21.51 (1C) 33.20 (1C), 33.37 (1C), 37.13 (1C), 39.20 (1C), 40.38 (1C), 41.71 (1C), 51.67 (1C), 56.04 (1C), 81.33 (1C), 99.47 (1C), 100.55 (1C), 123.59 (1C) , 127.67 (1C), 132.78 (1C), 146.61 (1C), 150.99 (1C), 155.49 (1C), 162.88 (1C), 164.17 (1C).

## Chlorosulfonic acid catalyzed cyclizations of terpenes as racemic standards

The reactions were carried out under nitrogen atmosphere. To a solution of 5 Eq. (2.5 mmol, 160µlL) of chlorosulfonic acid in 2-nitropropane (3 mL) was added a solution of terpene (0.5 mmol, 1 eq.) in 2-nitropropane (6 mL) at –78 °C and was stirred for 10 min. The reaction was quenched by adding saturated aq. NaHCO3 solution (10 ml) and then further portions of solid NaHCO3 were added to obtain basic pH. The reaction mixture was extracted with Et2O (3x 15 mL), dried over MgSO4 and the resulting crude product was used for chiral GC analysis. For chromatograms see G.

# Supporting chromatograms

The following GC chromatograms show the chlorosulfonic acid-catalyzed cyclization of the substrate in the scheme in (a) and the enzyme-catalyzed reaction in (b) and (c). Chiral chromatograms are shown in the enzyme-catalyzed reaction. For (–)-γ-dihydroionone stereochemistry please see ref. 7.


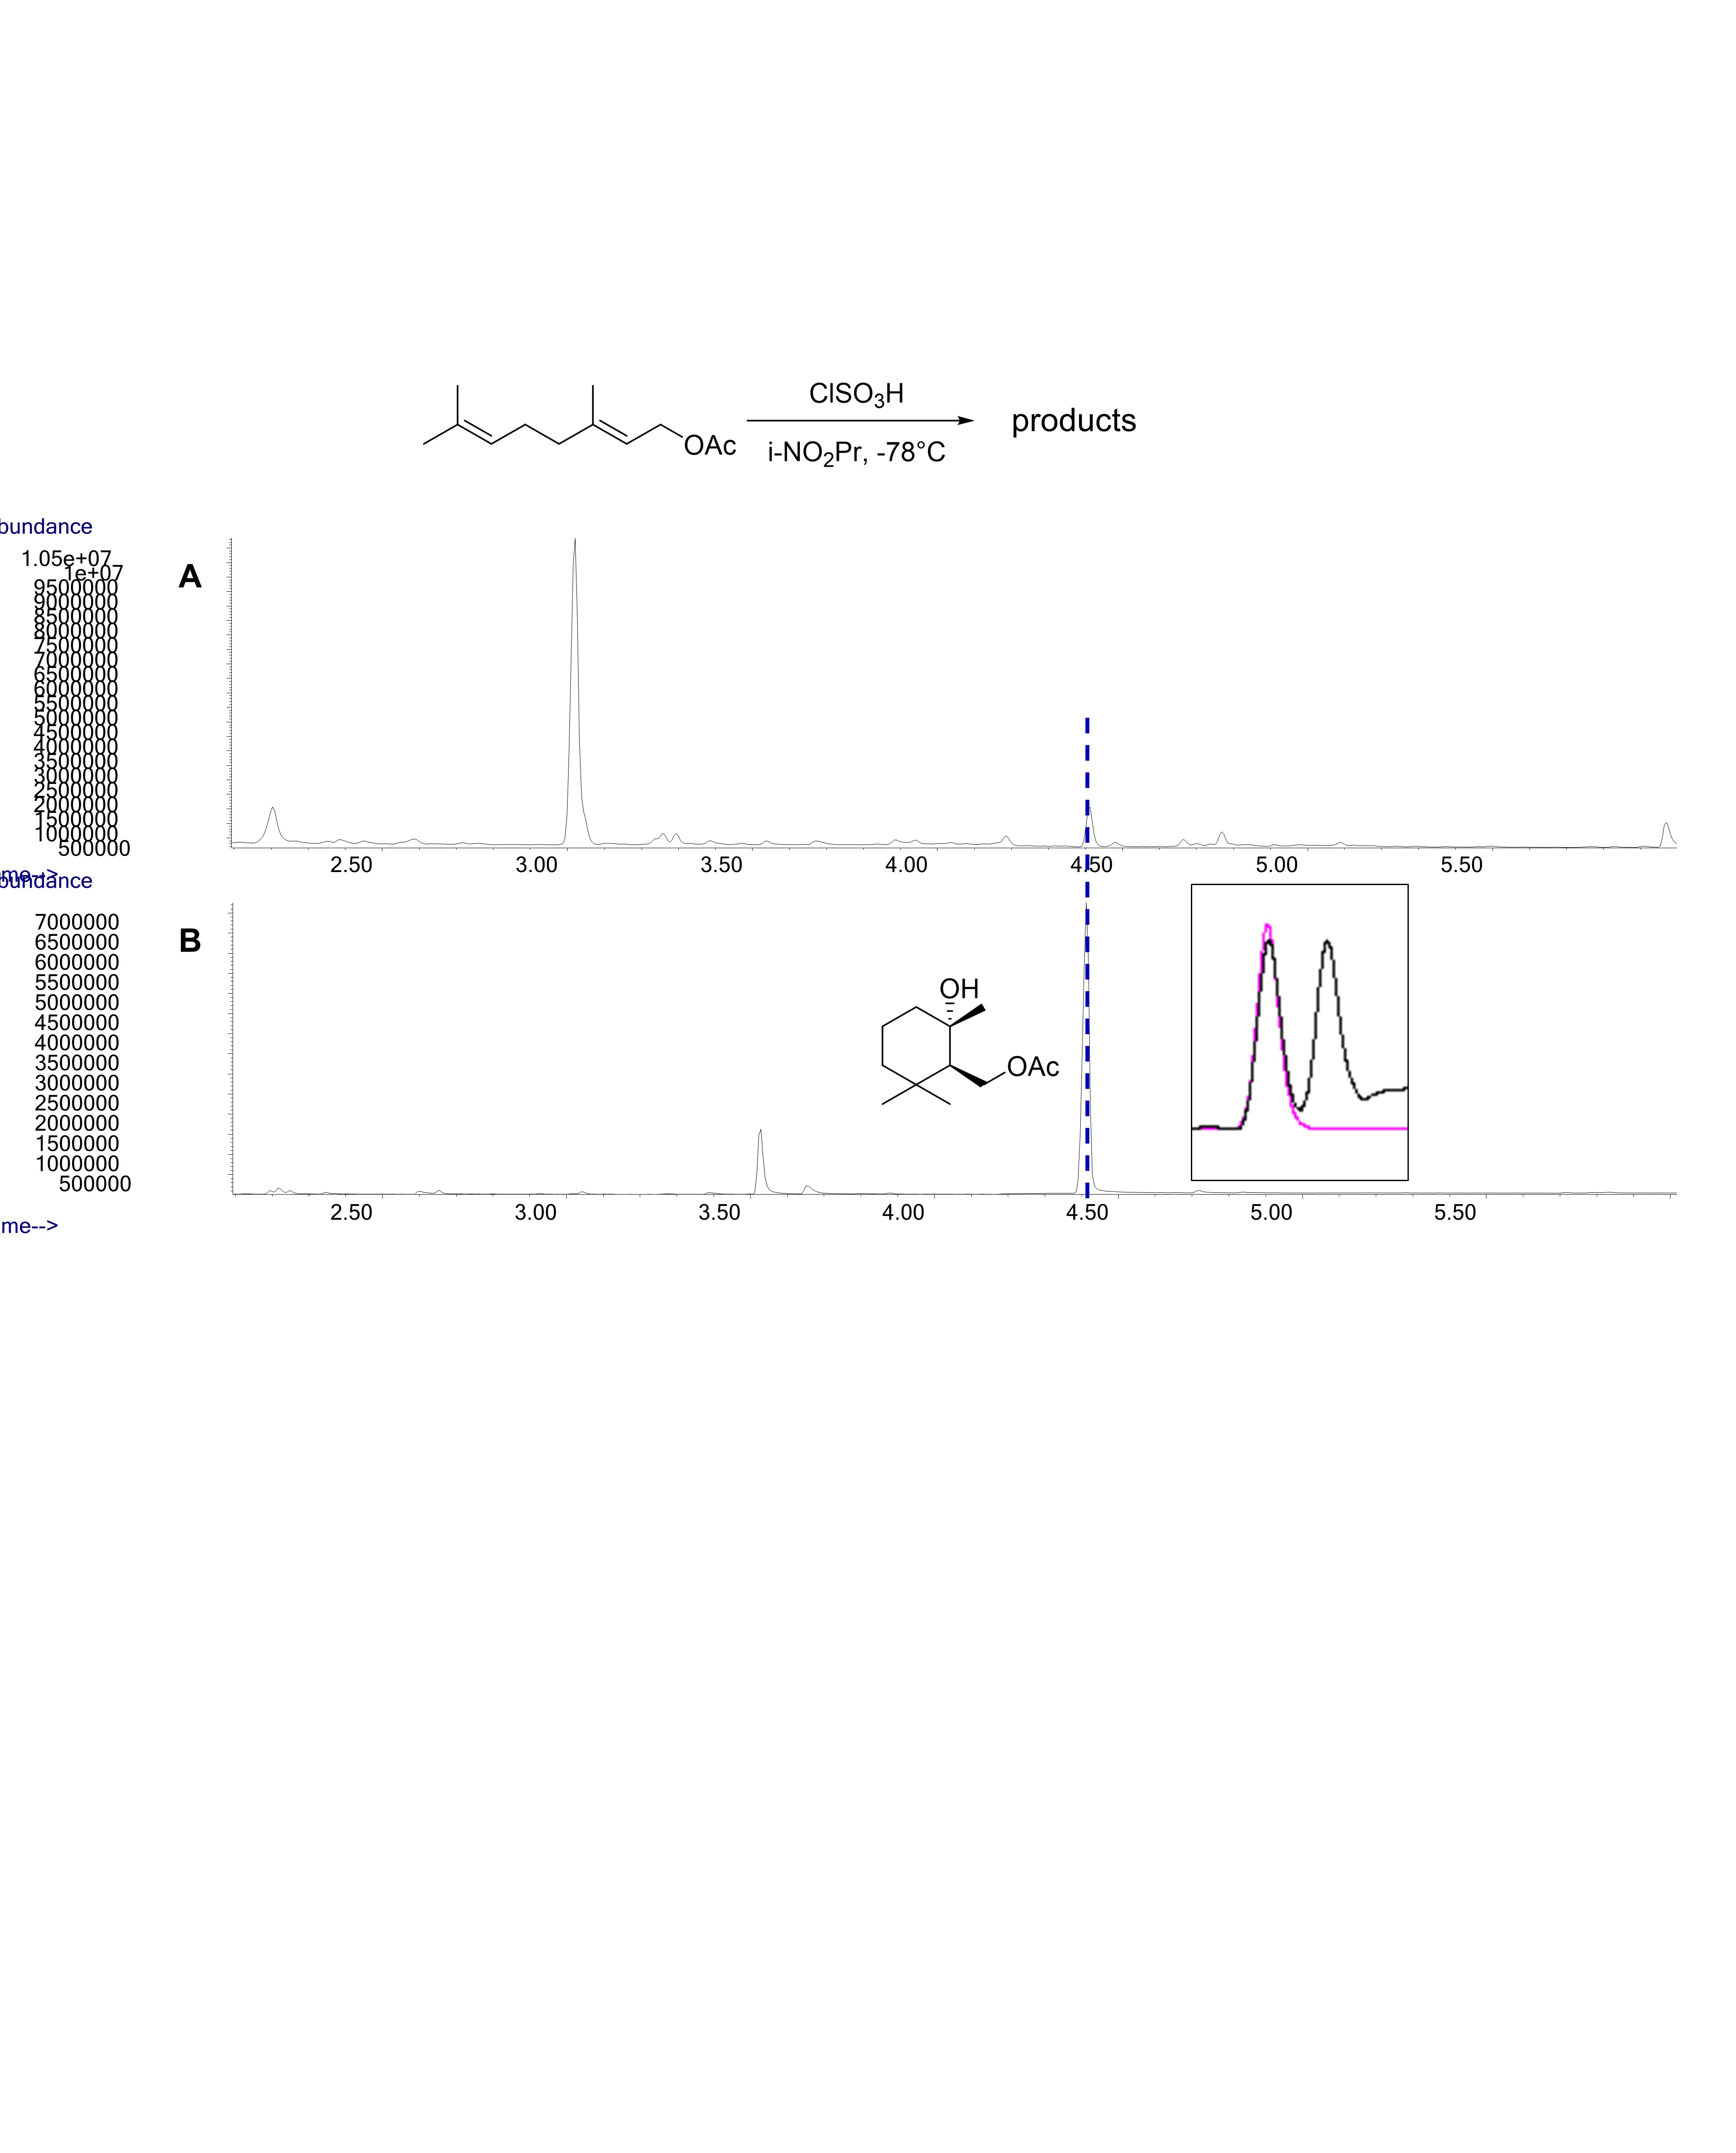


**Chromatogram 1**: Gernayl acetate 6 cyclization (a) using chlorosulfonic acid and (b) AacSHC G600R including the chiral chromatogram.


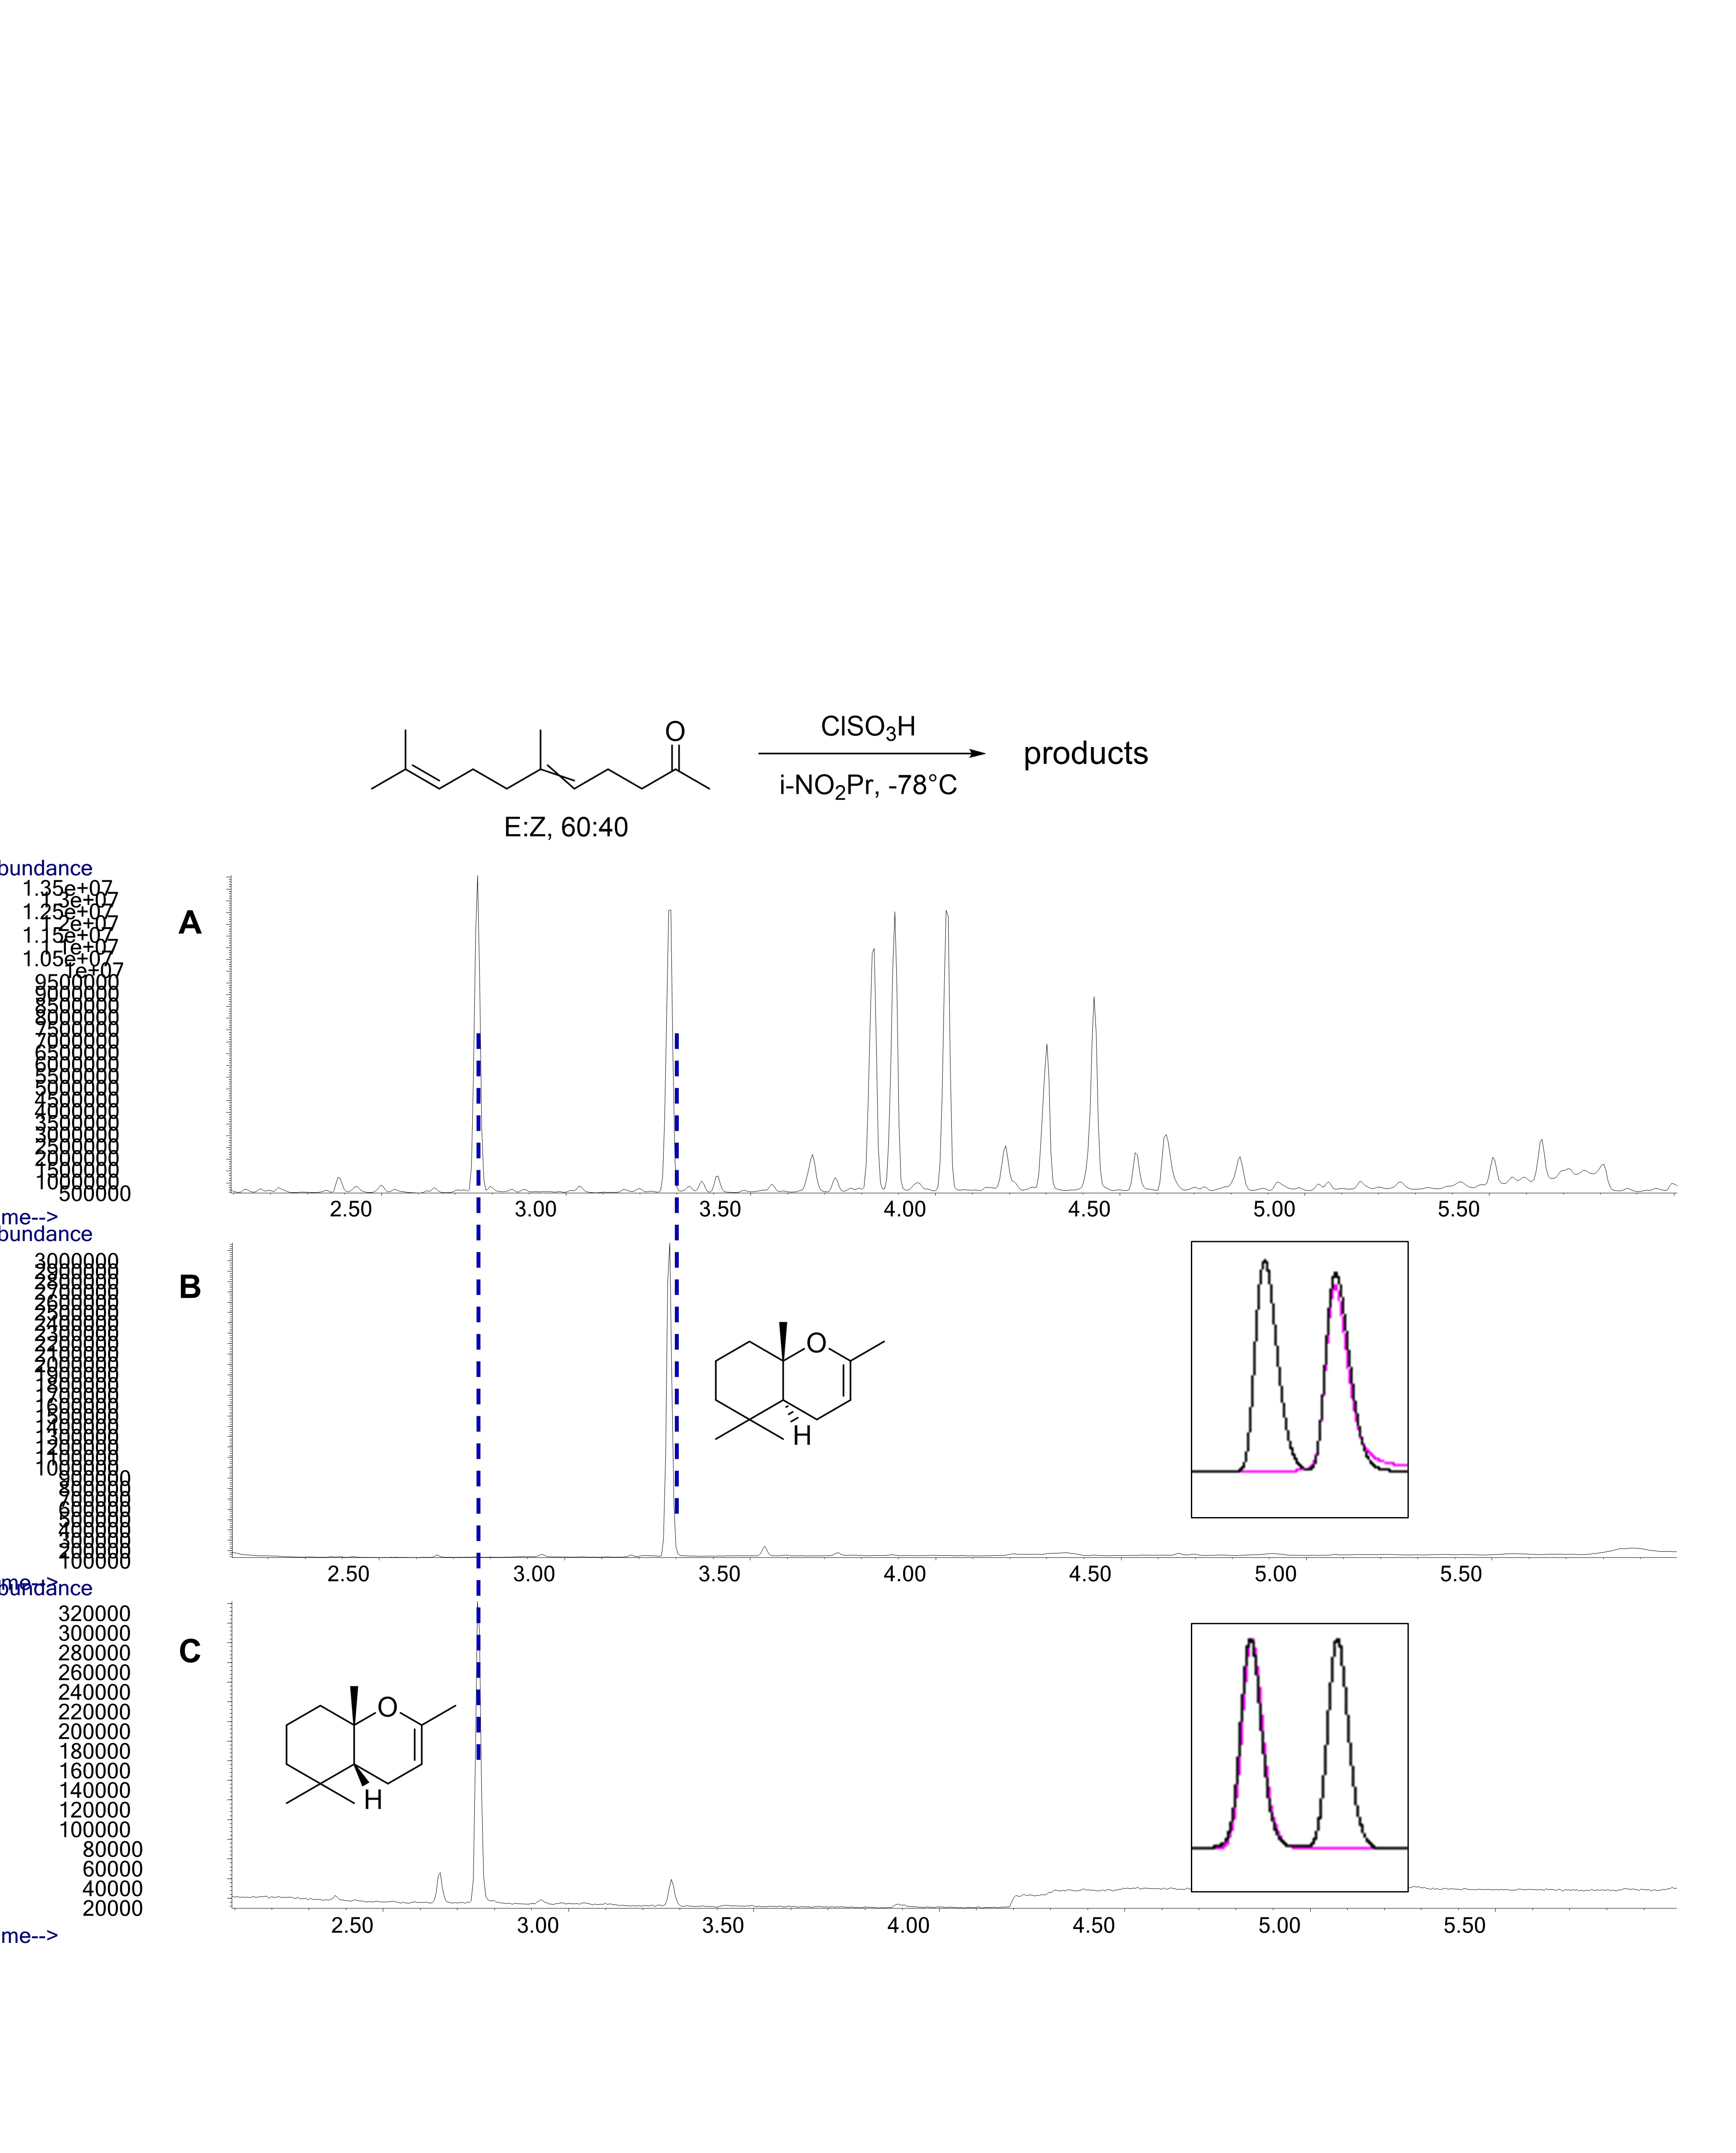


**Chromatogram 2**: Geranyl acetone 17 and neryl acetone cyclization Z-17 using (a) chlorosulfonic acid and (b) and (c) AacSHC G600M including the chiral chromatograms.


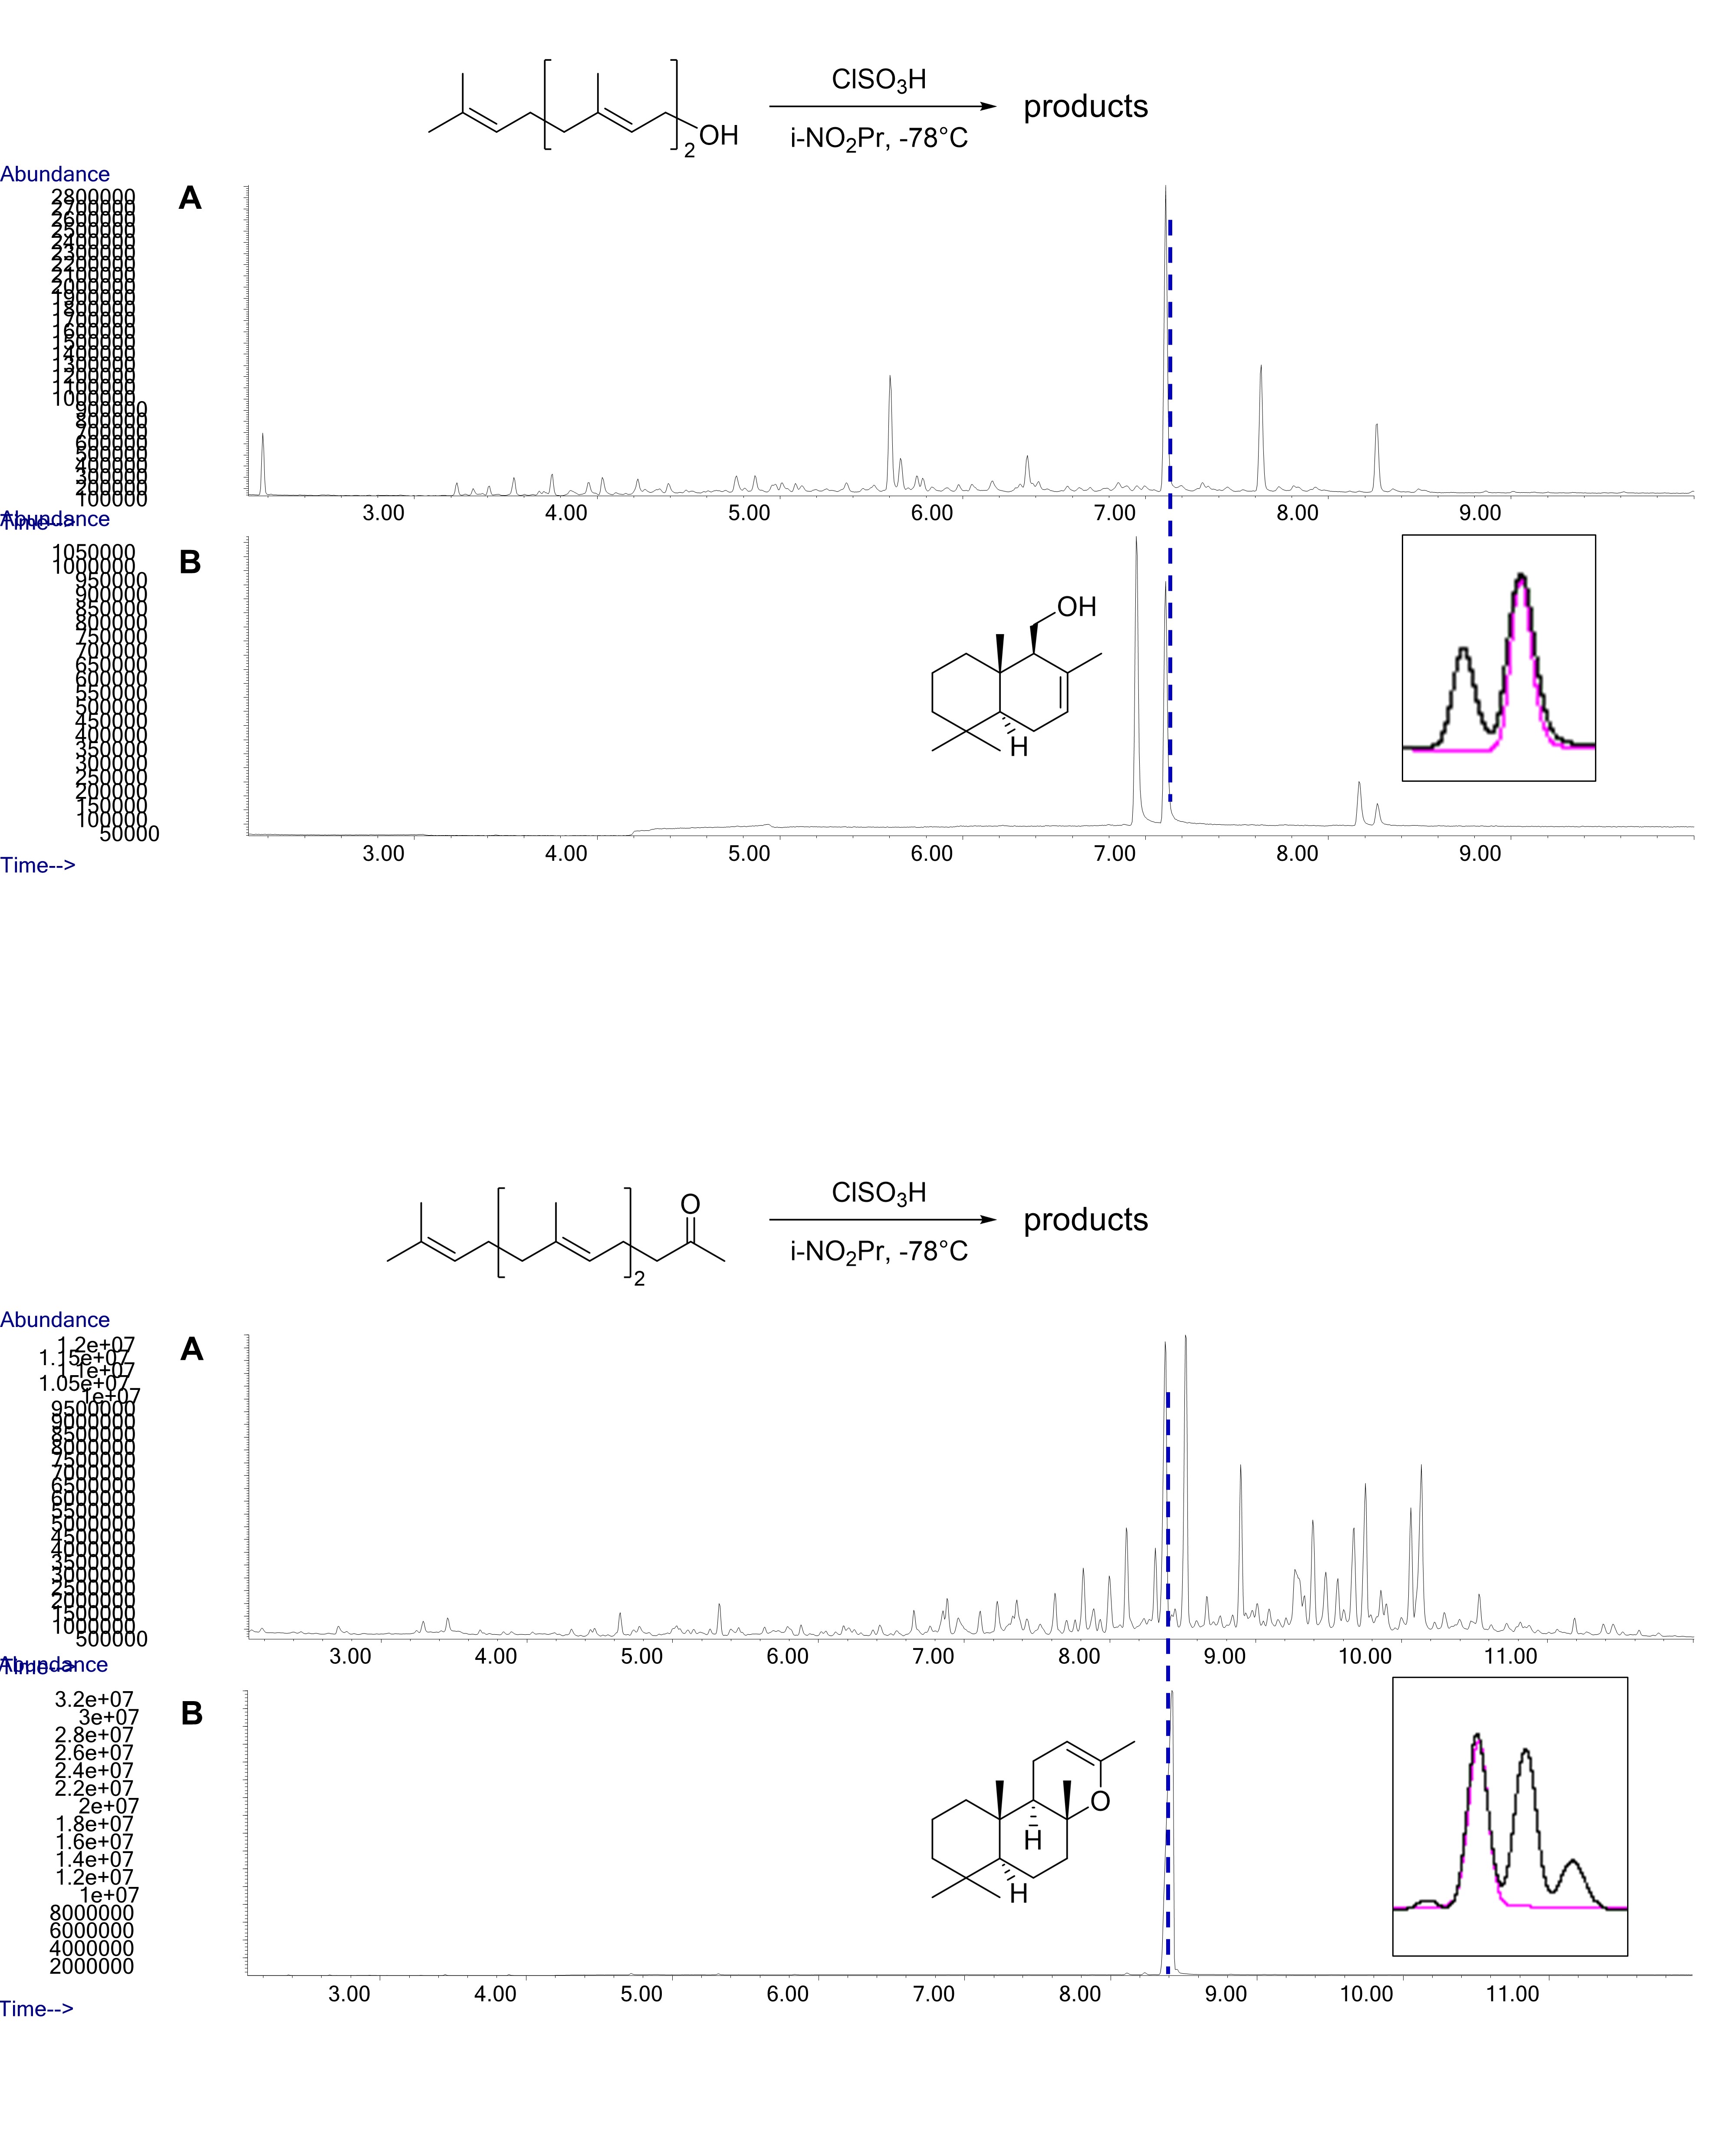


**Chromatogram 3:** Farnesol 8 cyclization using (a) chlorosulfonic acid and (b) AacSHC A306W including the chiral chromatogram.


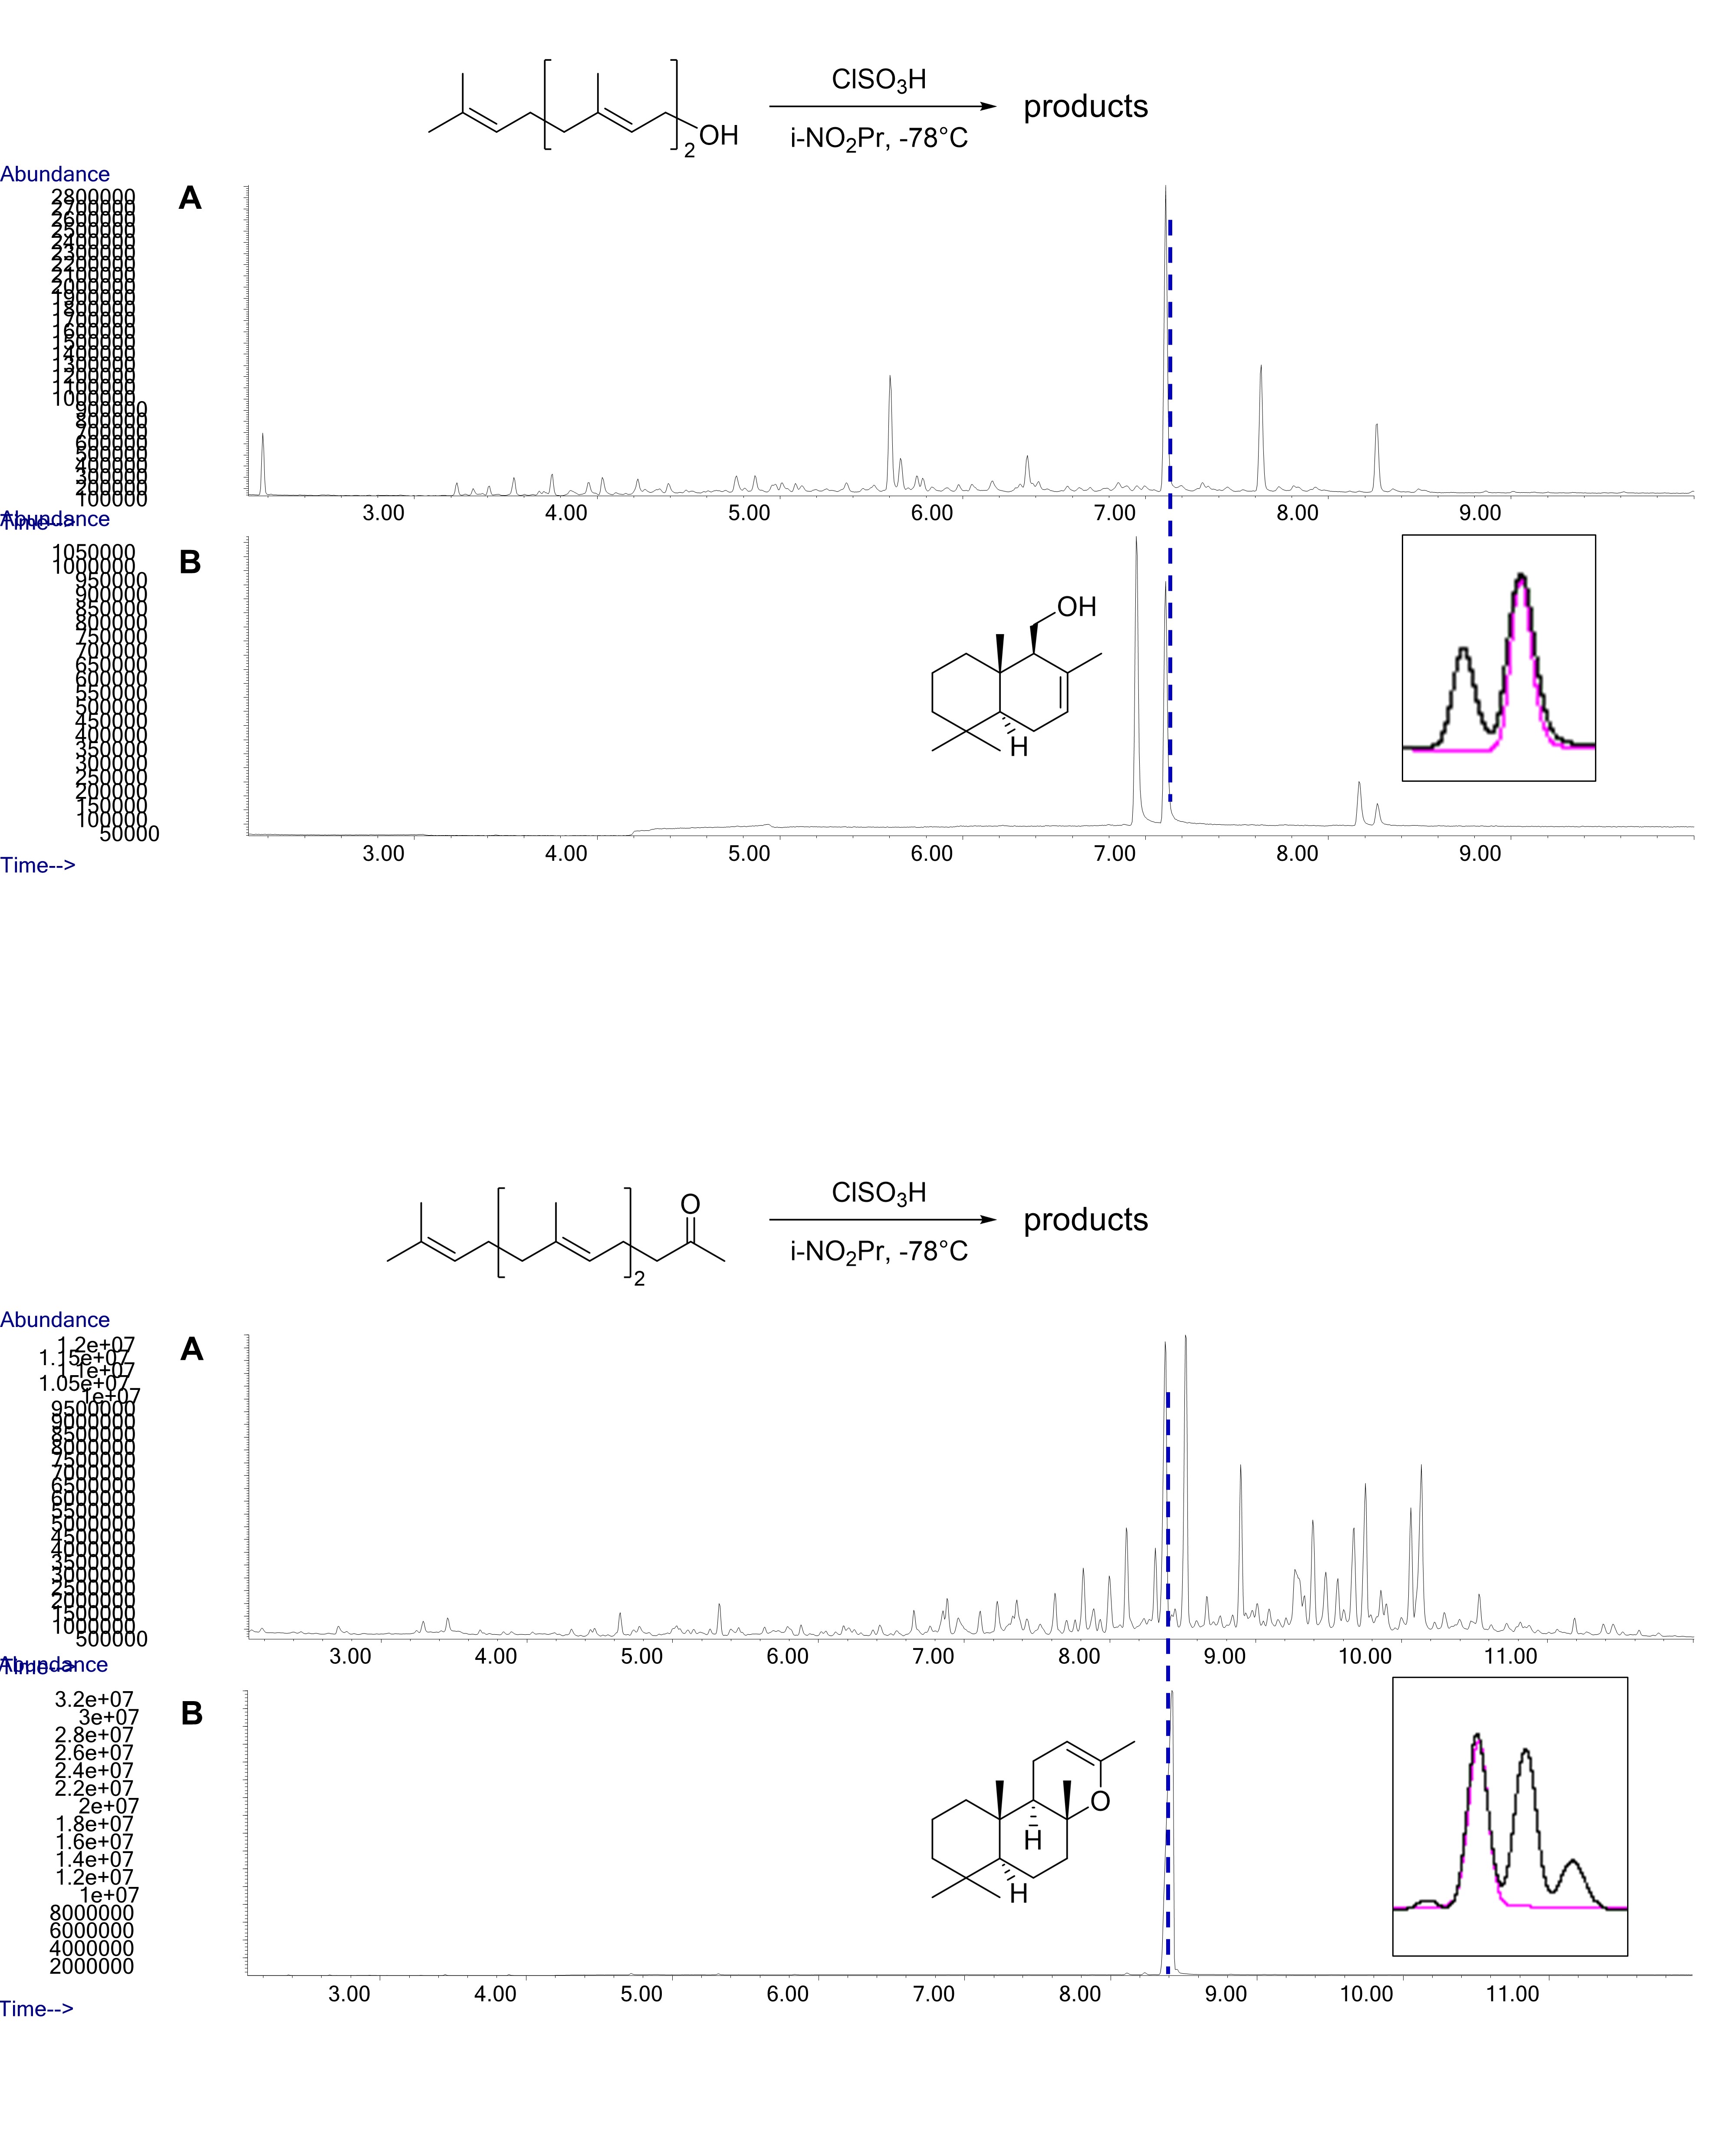


**Chromatogram 4**: Farnesyl acetone 13 cyclization using (a) chlorosulfonic acid and (b) AacSHC F601D F605L including the chiral chromatogram.


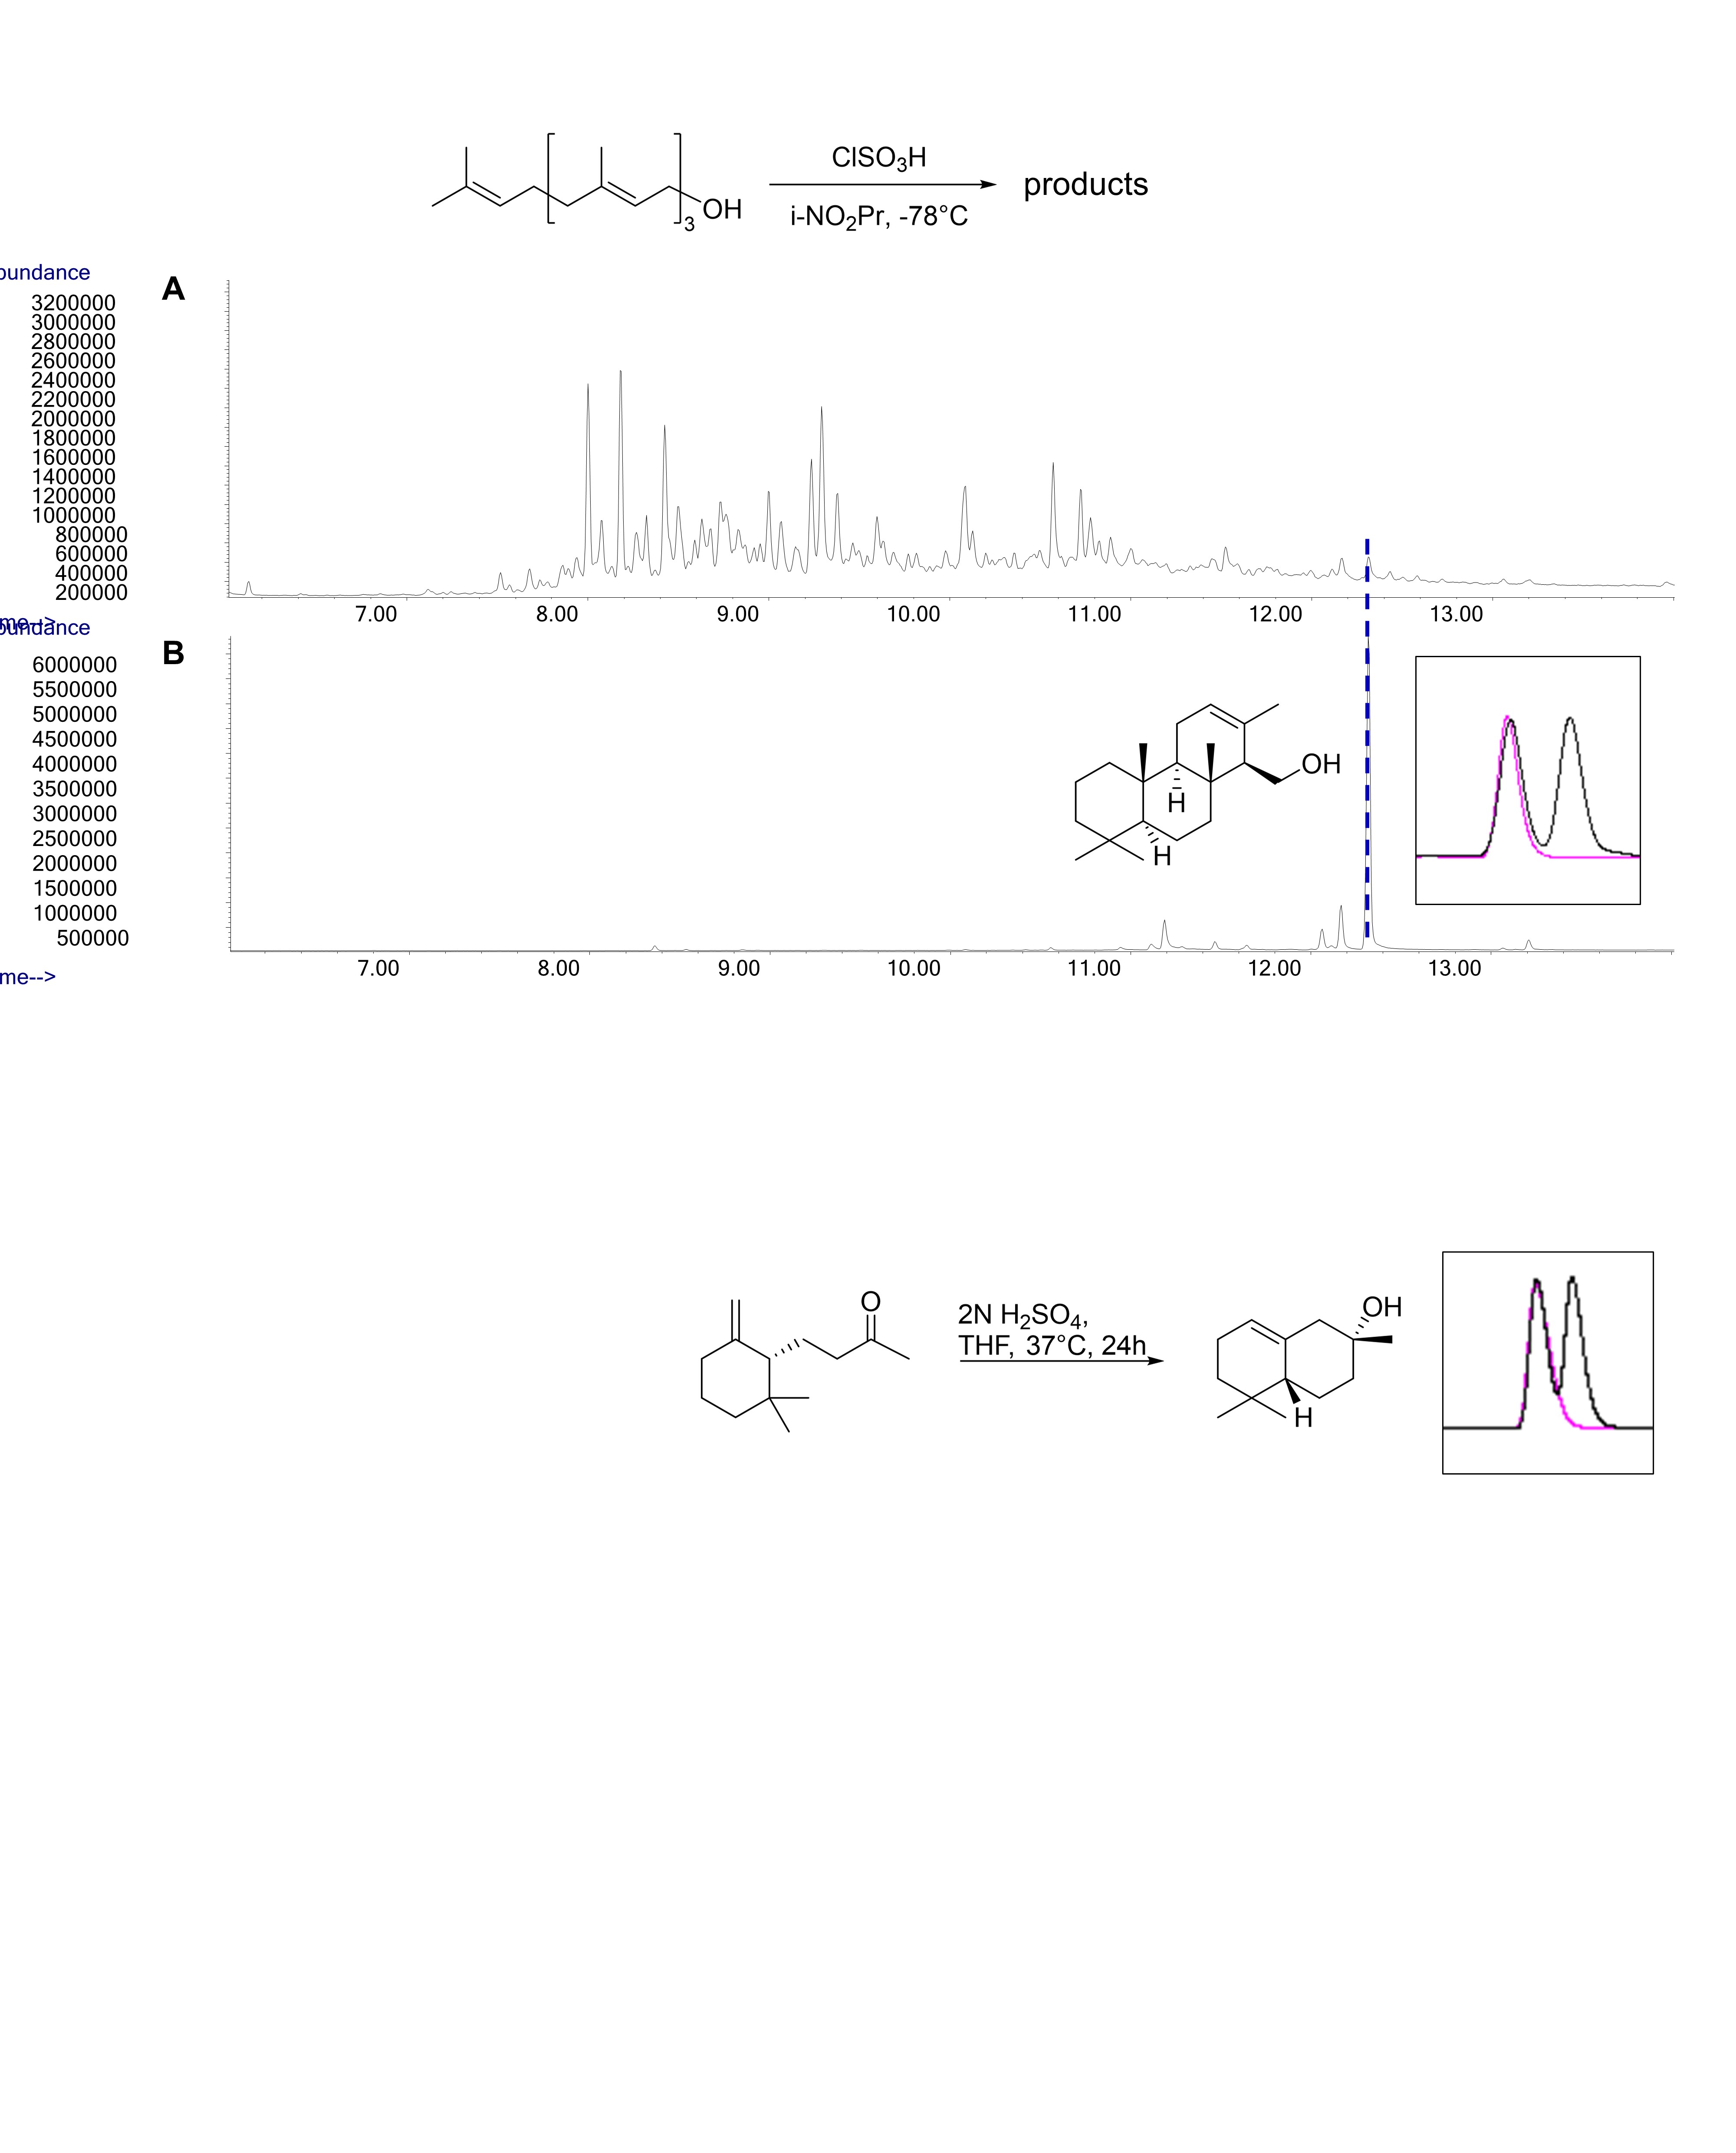


**Chromatogram 5:** Geranyl geraniol 10 cyclization using (a) chlorosulfonic acid and (b) AacSHC F605W including the chiral chromatogram.


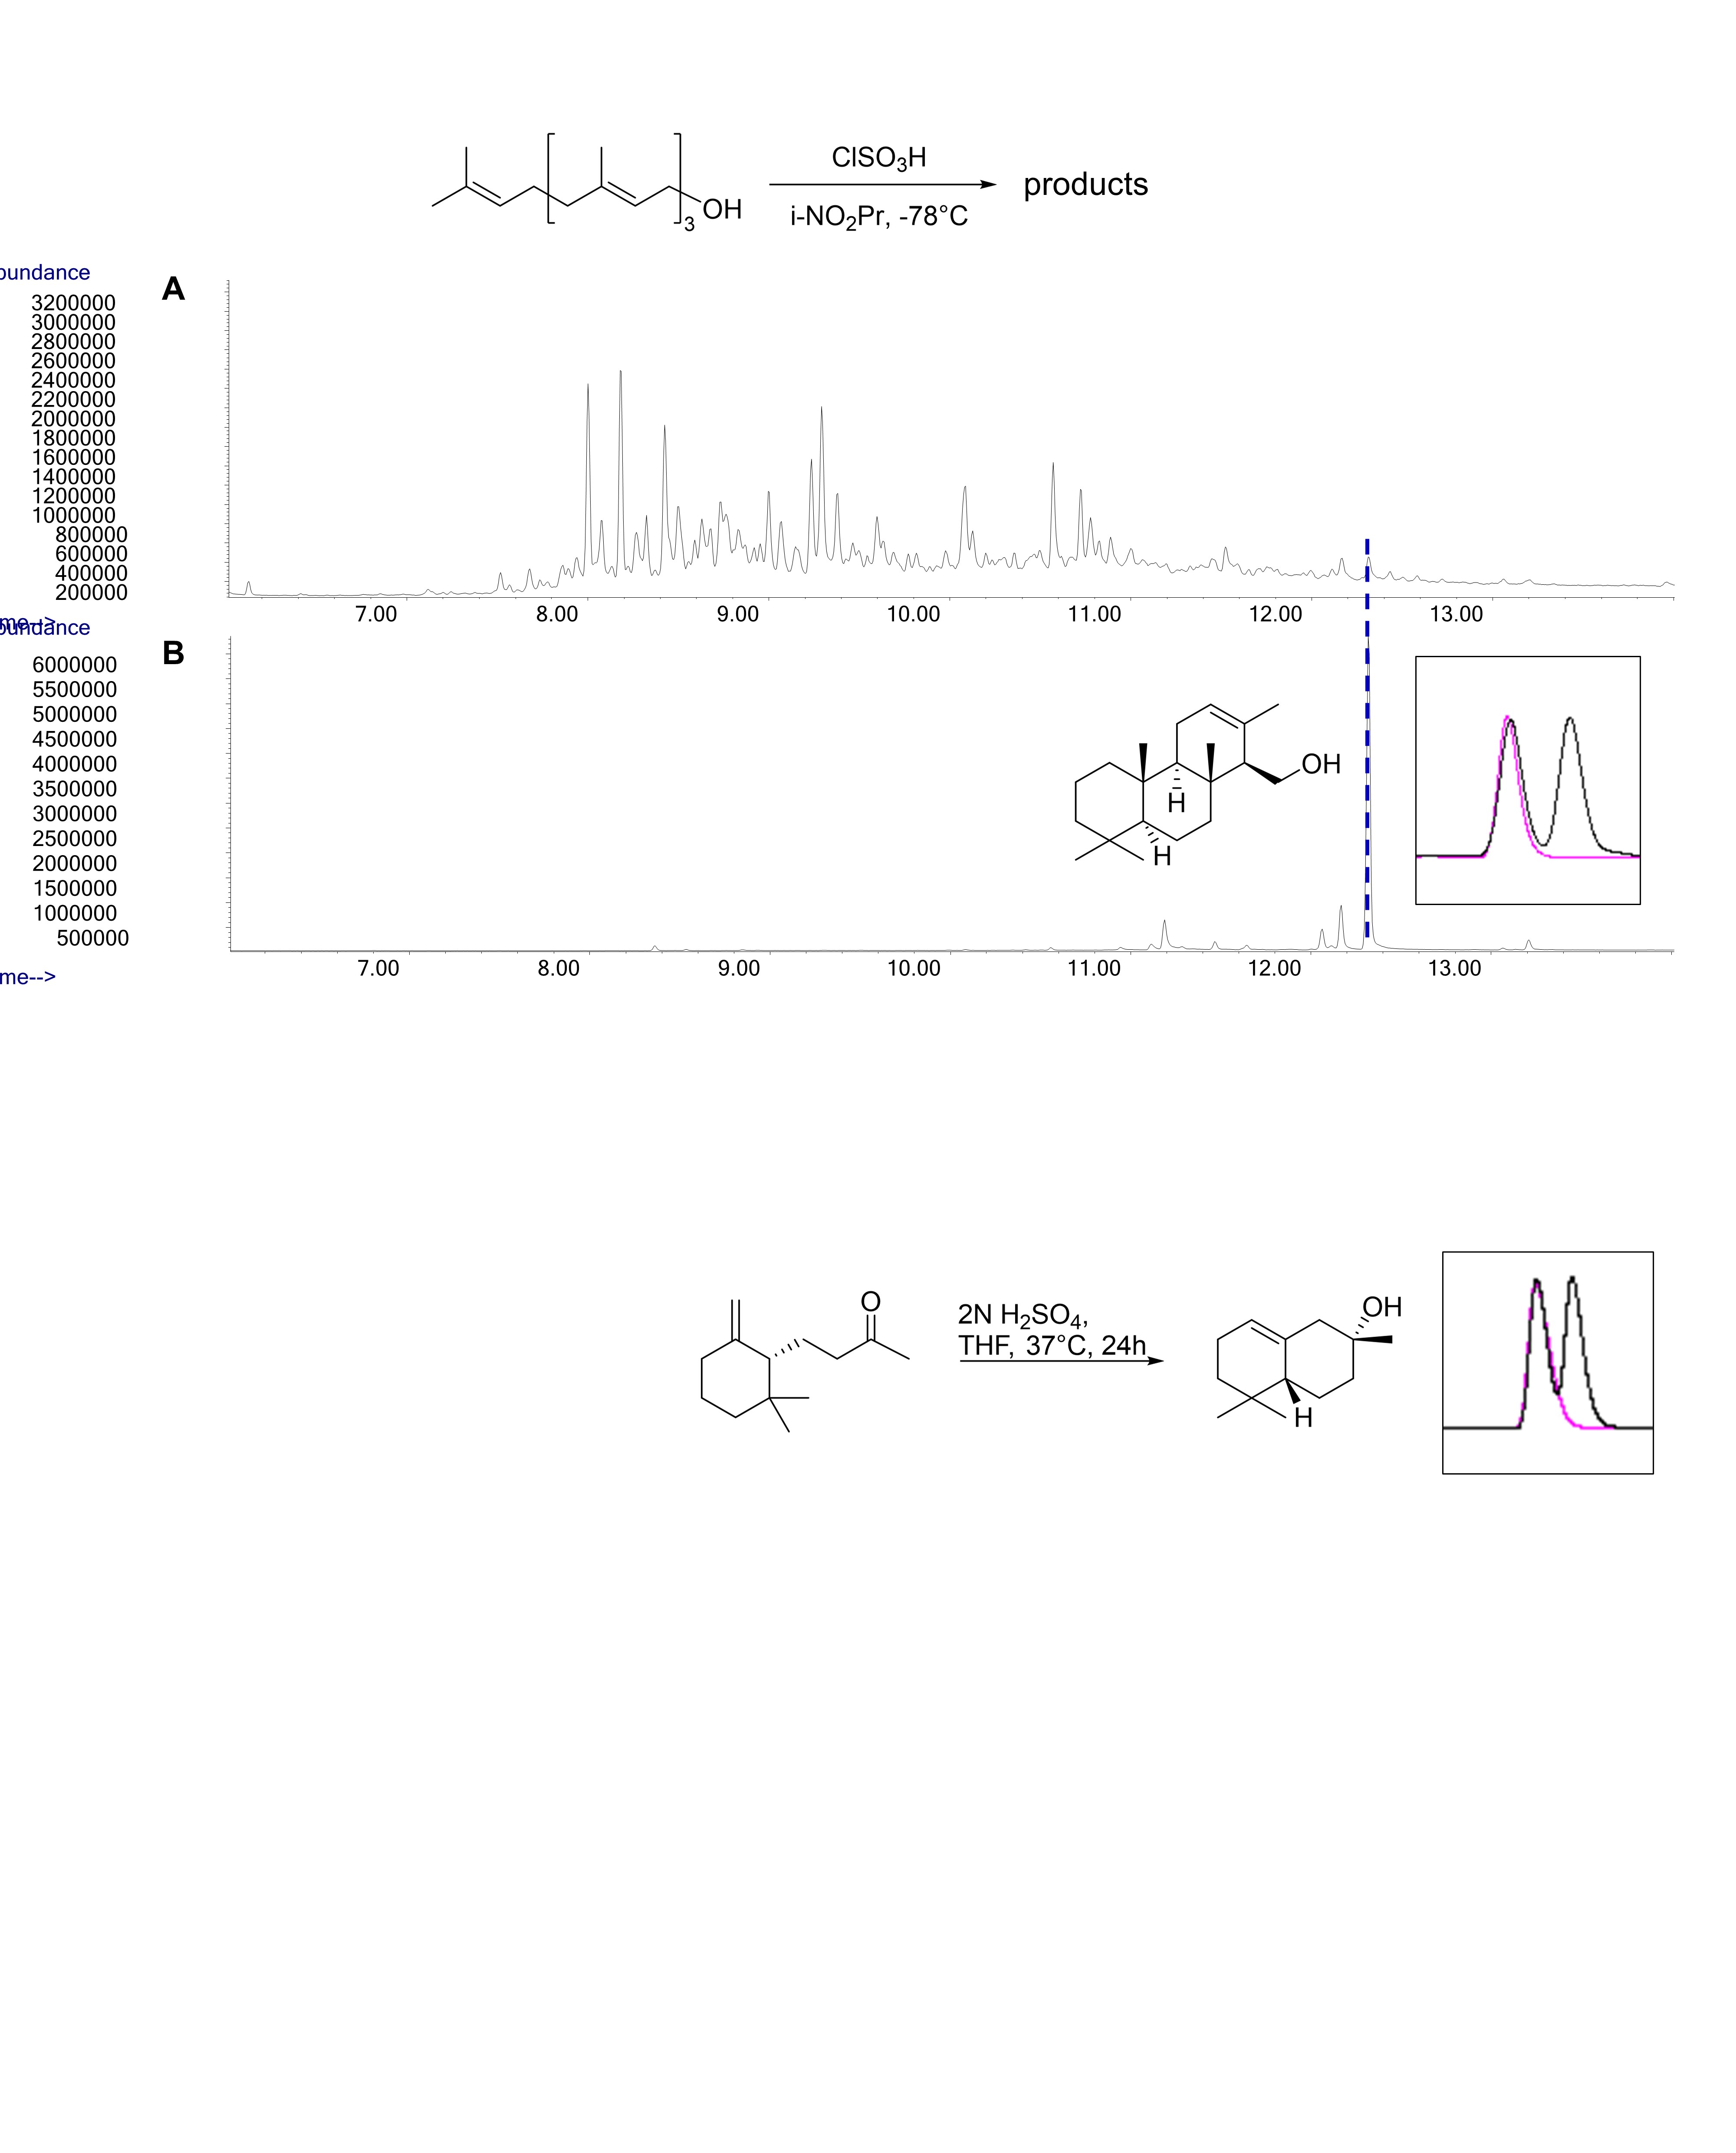


**Chromatogram 6:** (–)-γ-dihydroionone cyclization to (+)-α-ambrinol using sulfuric acid.7

# Supporting mass spectra


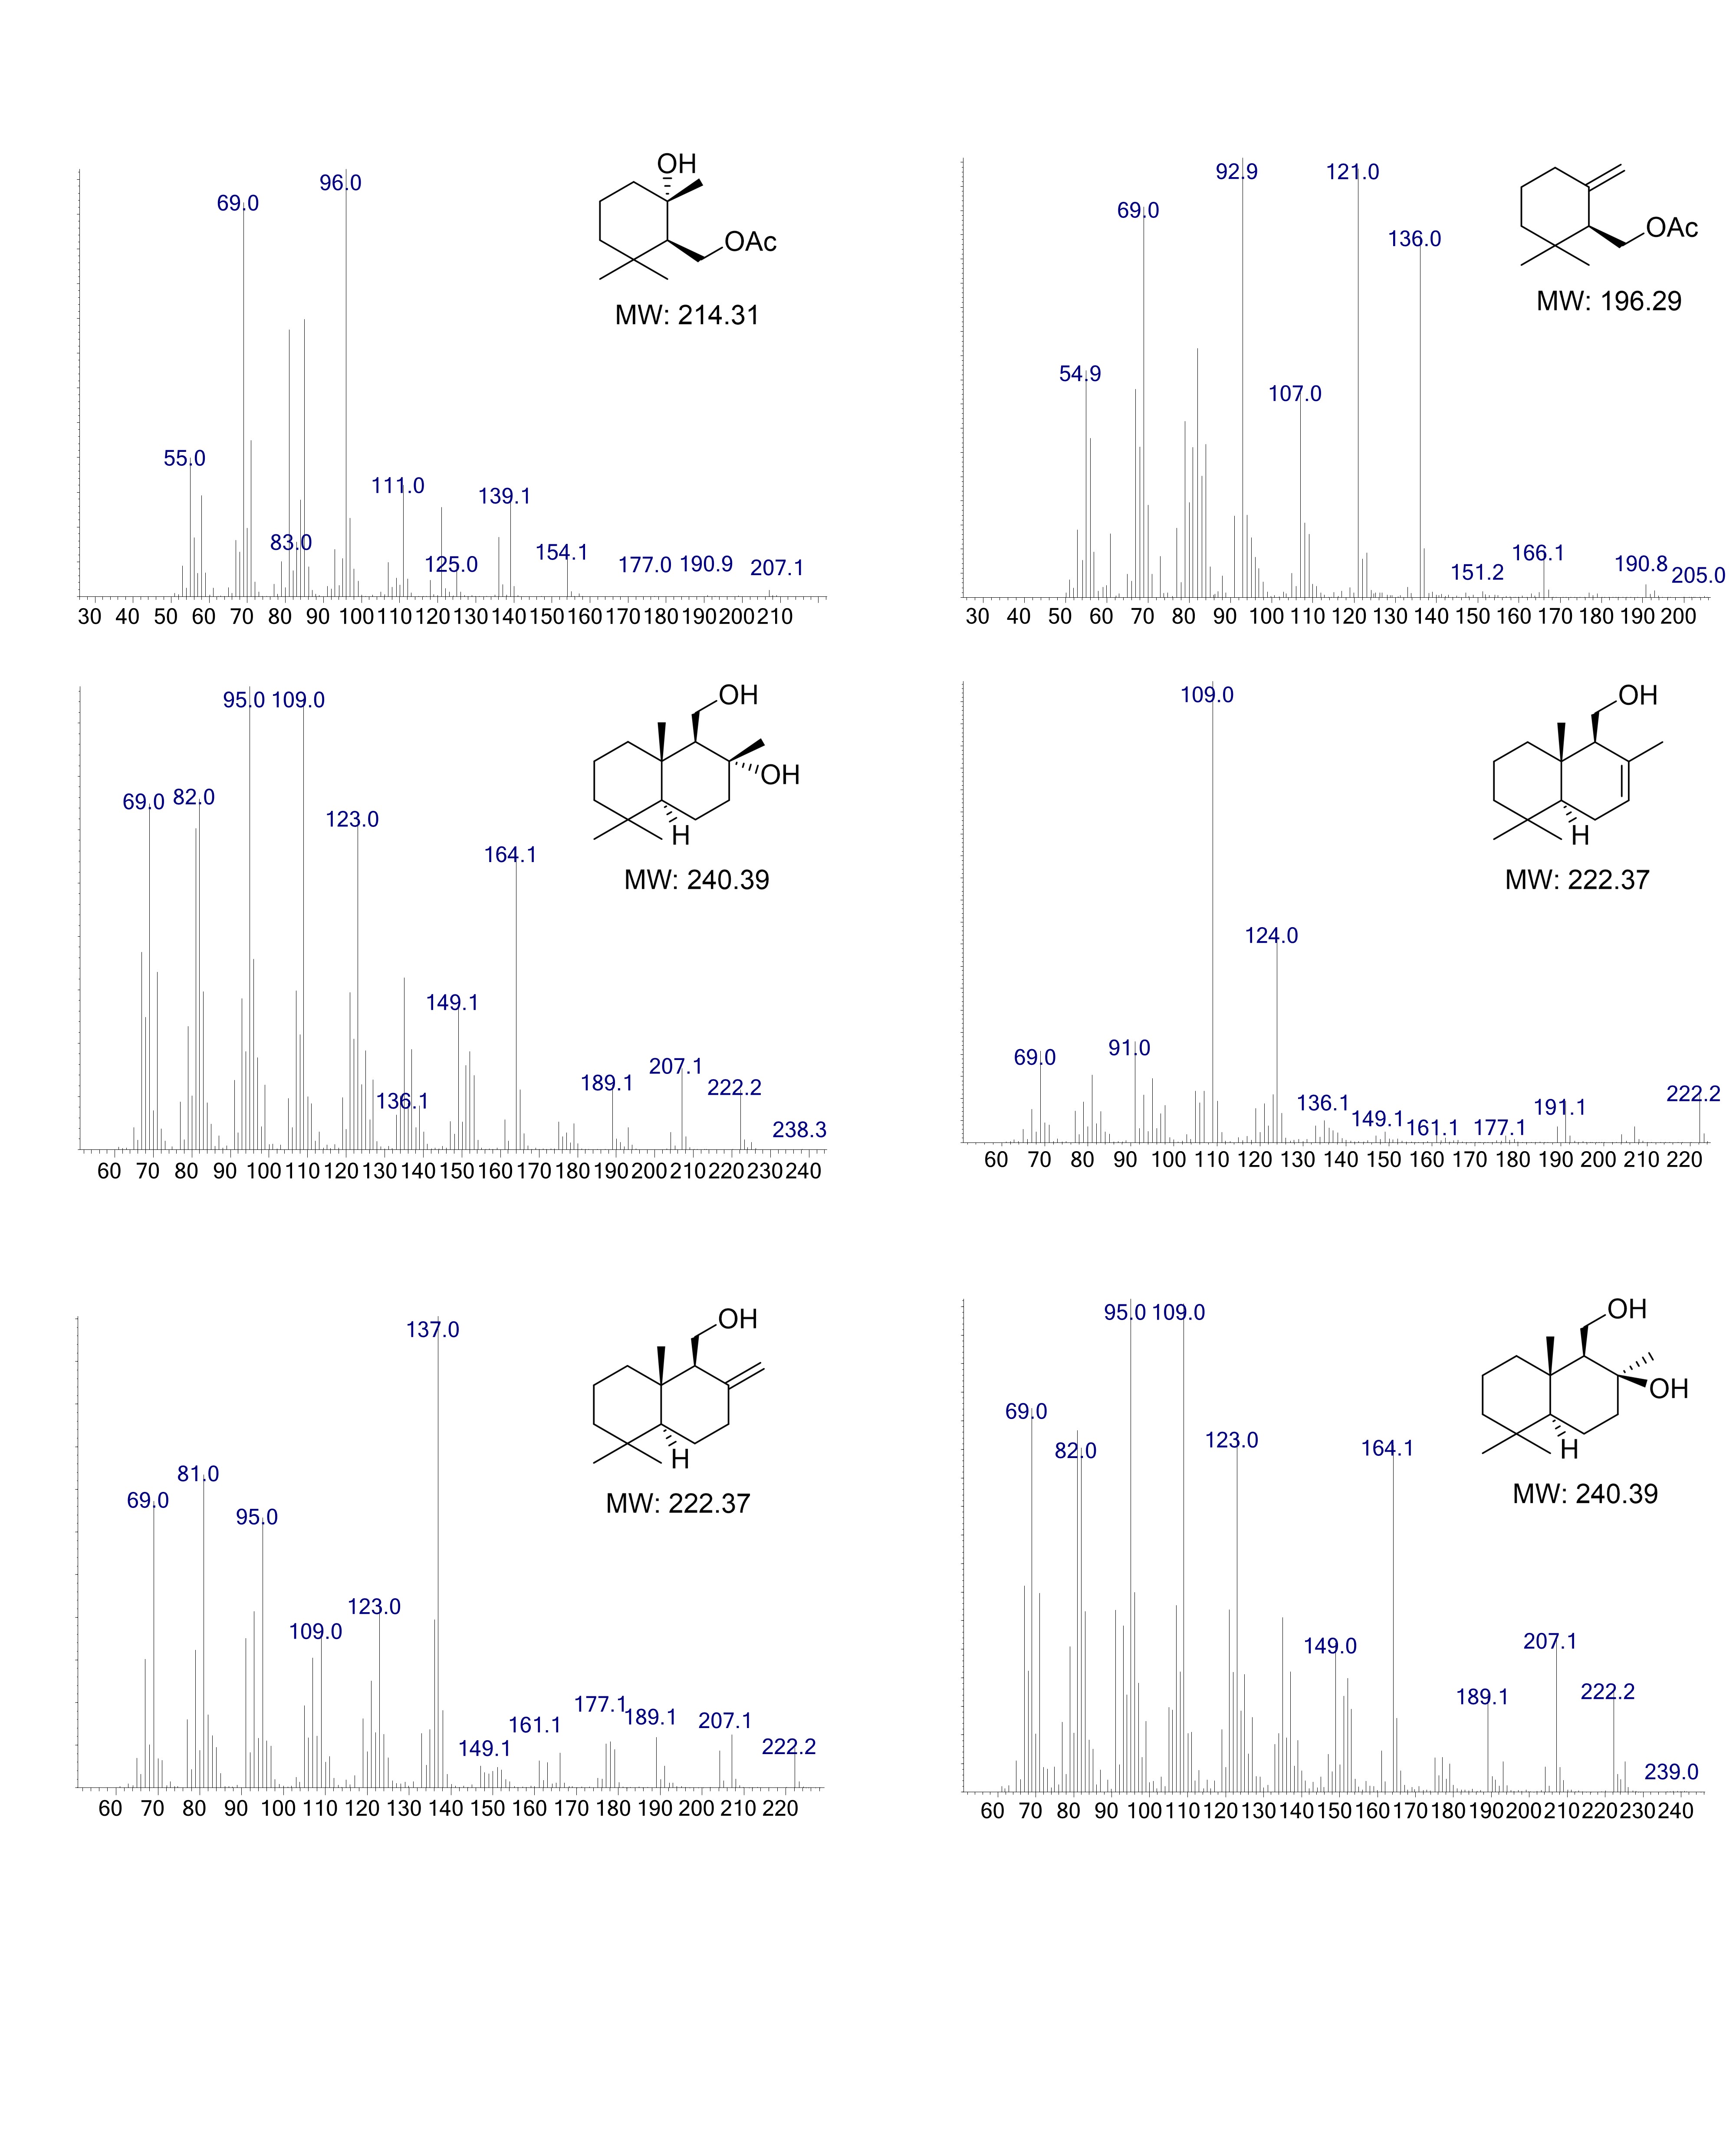


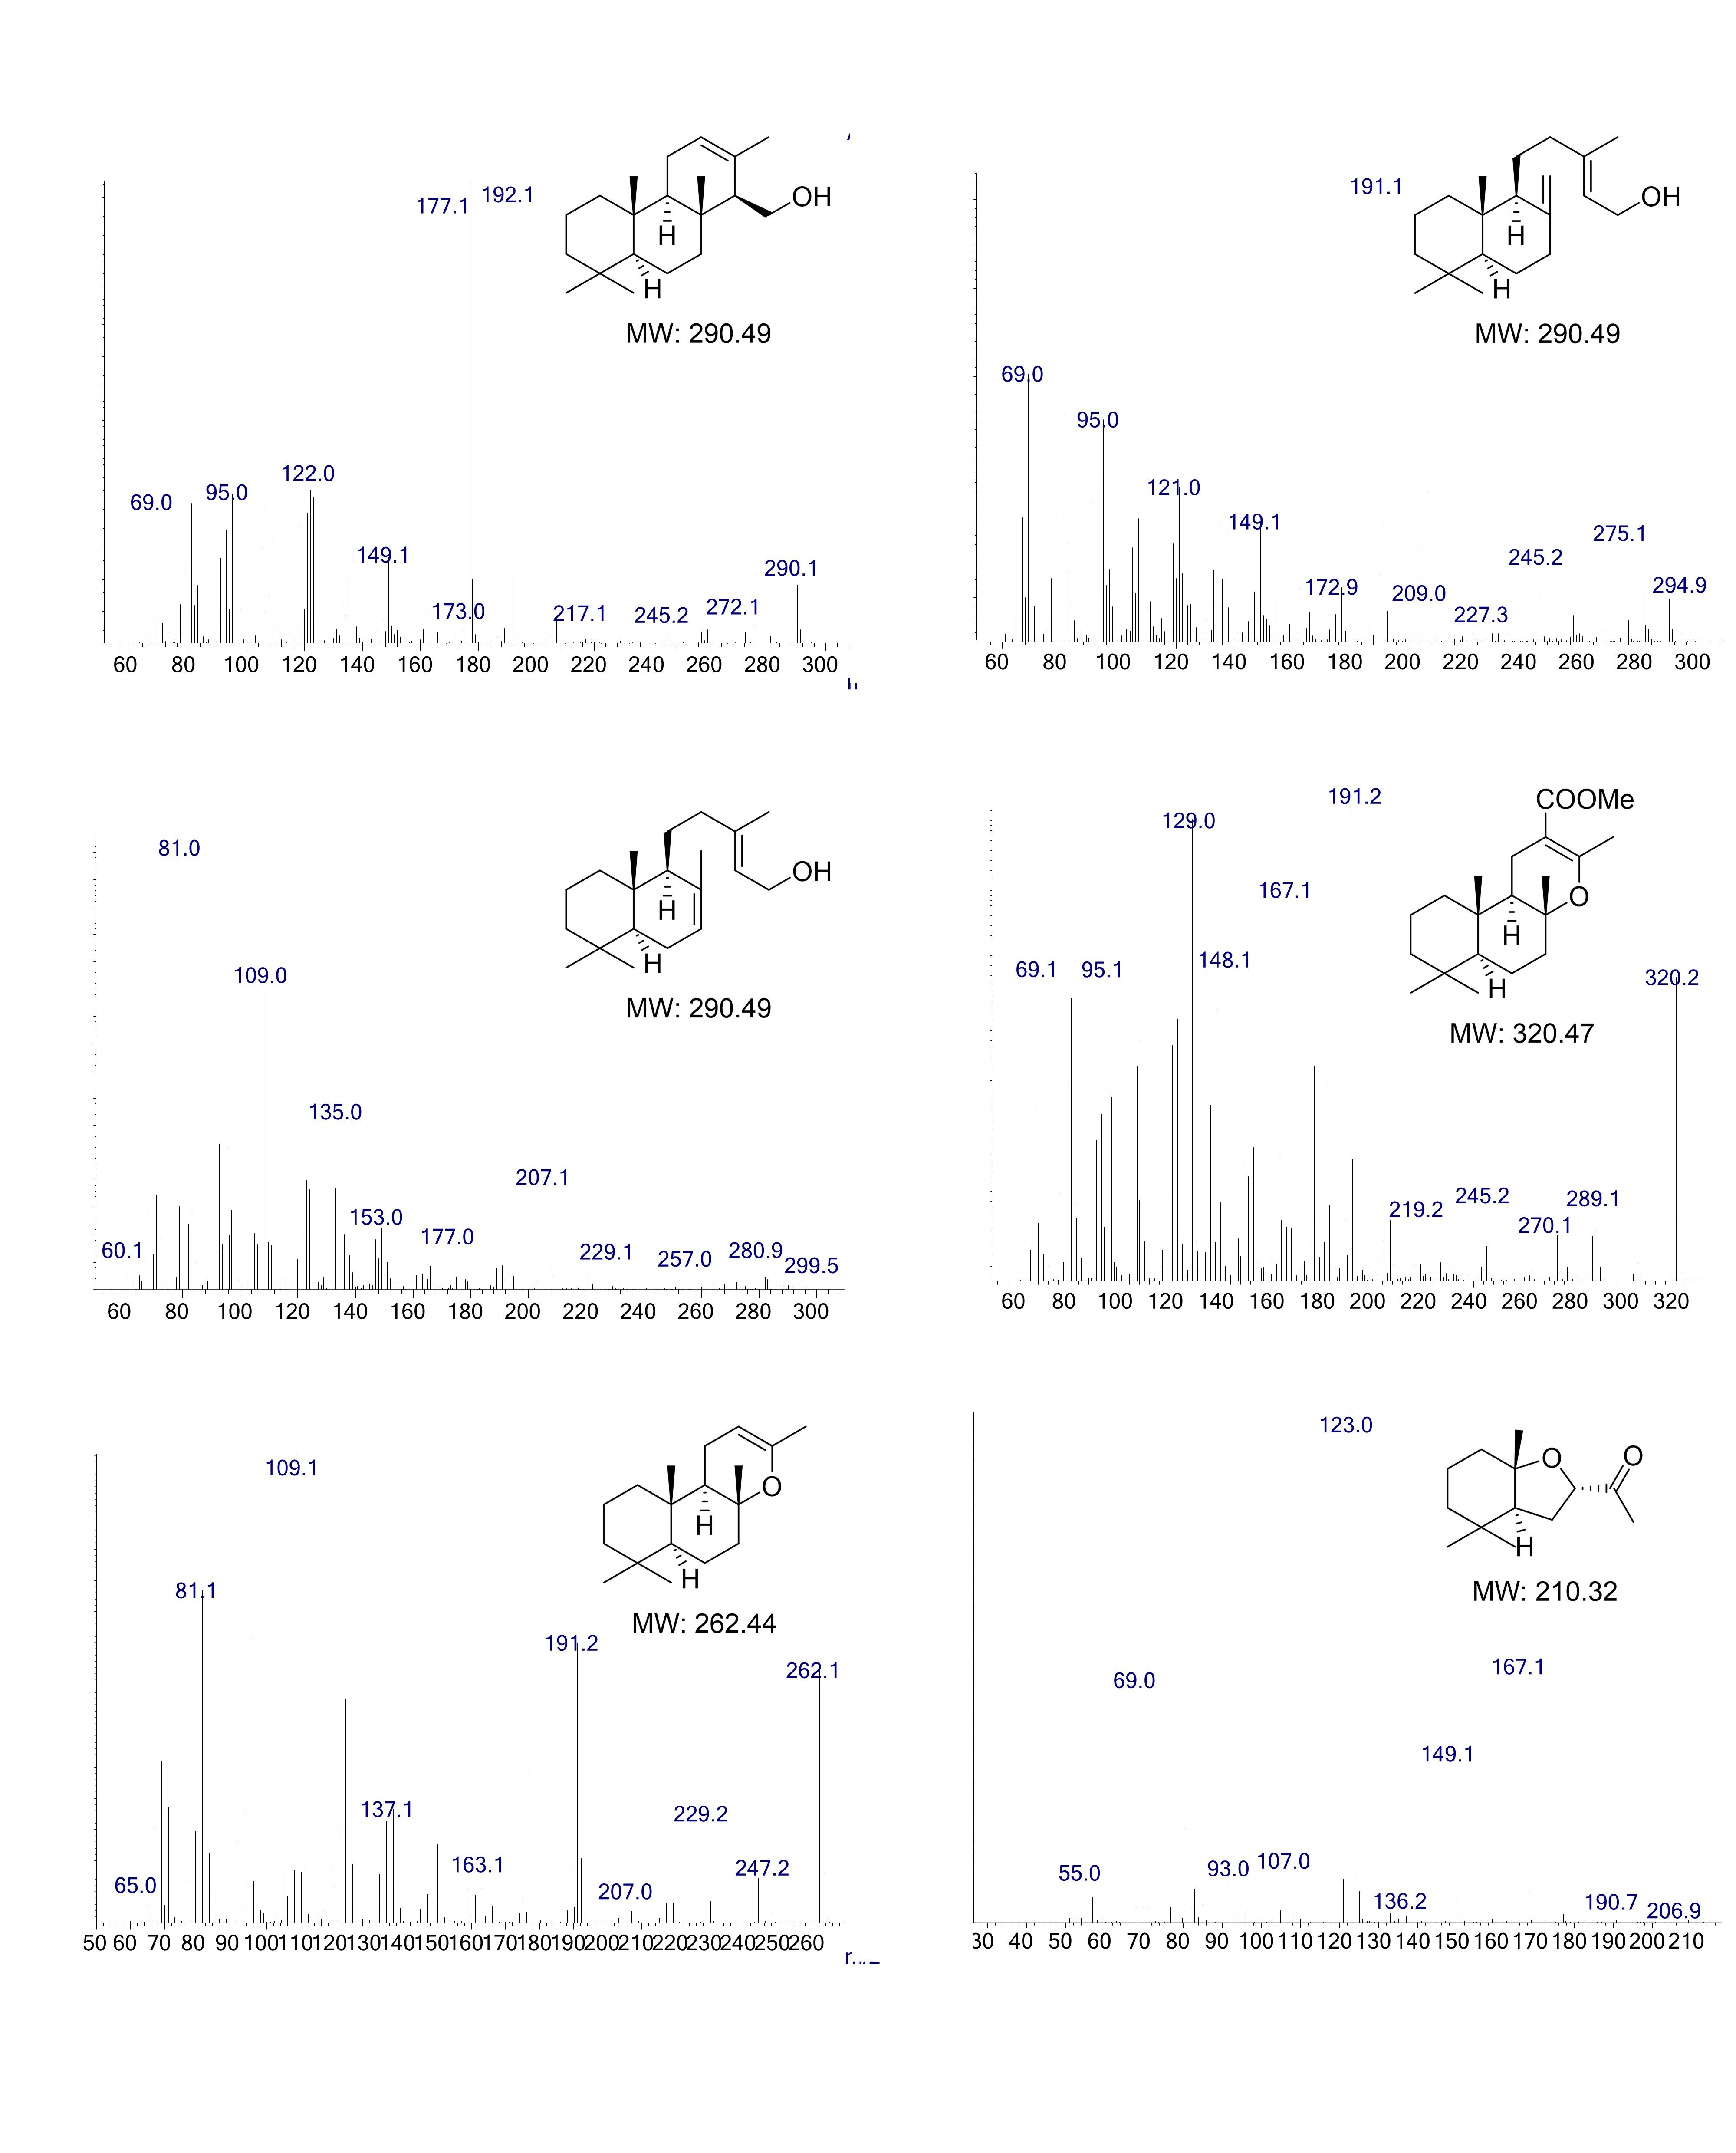


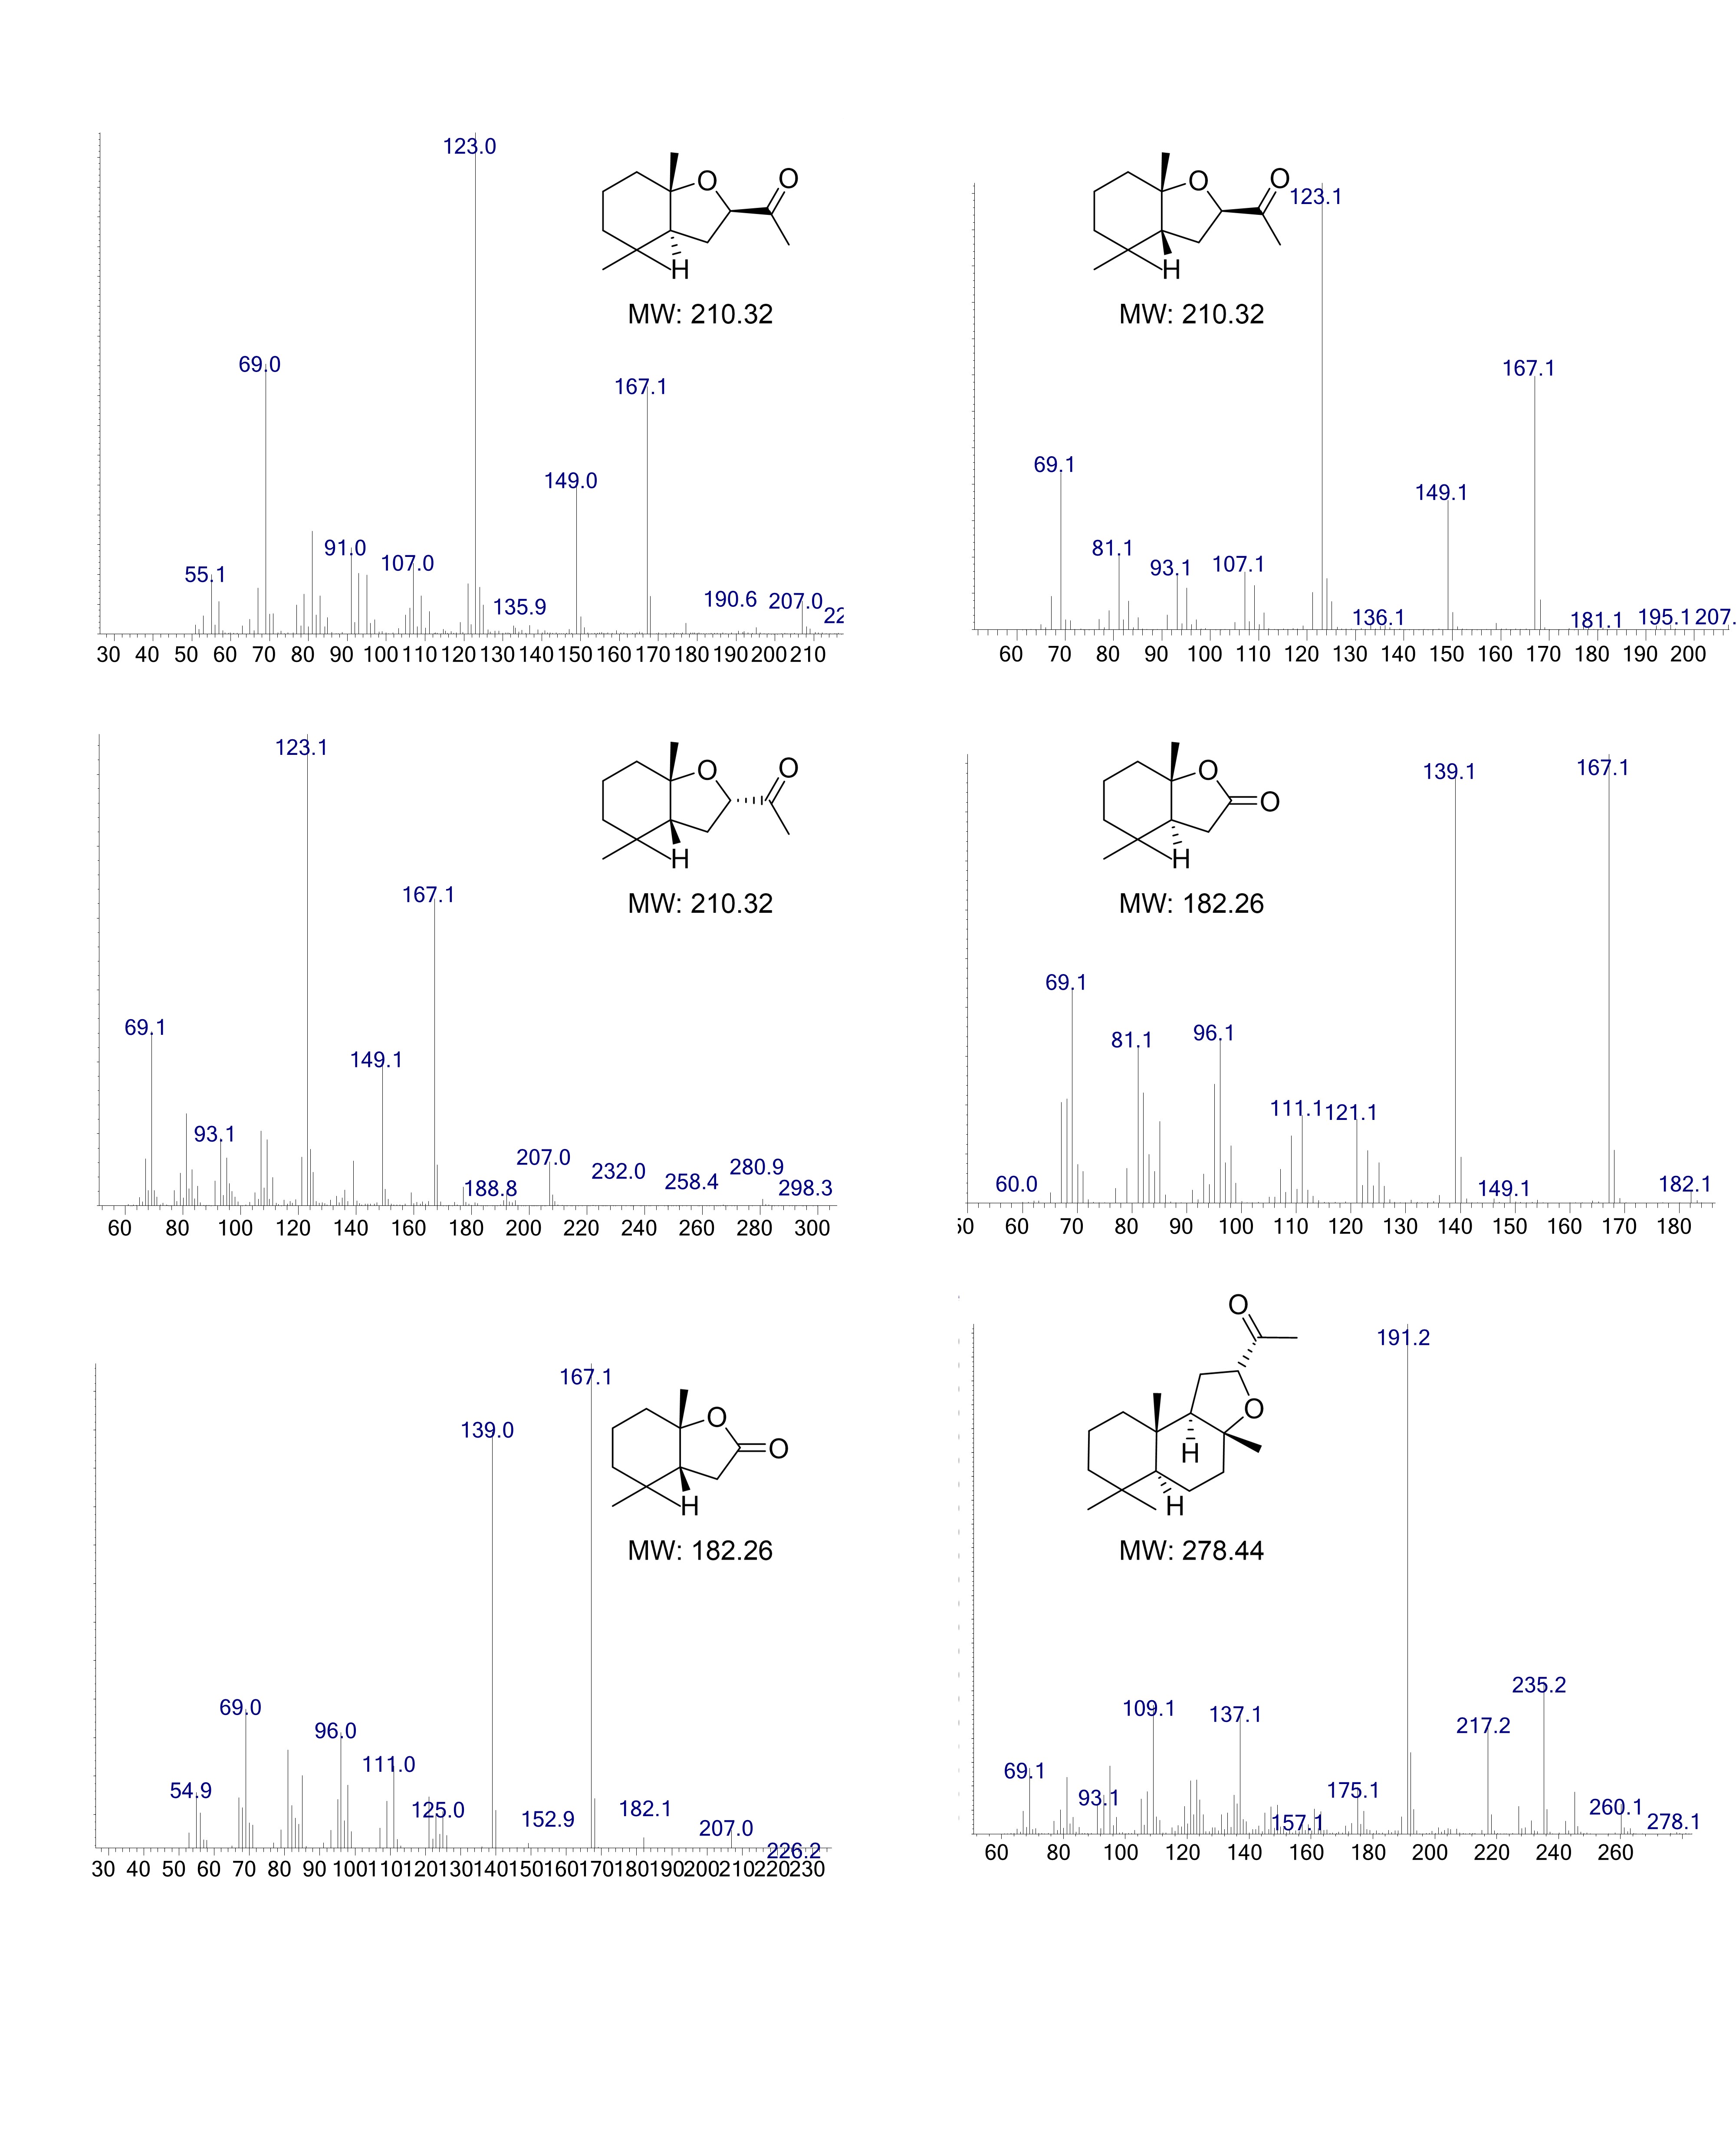


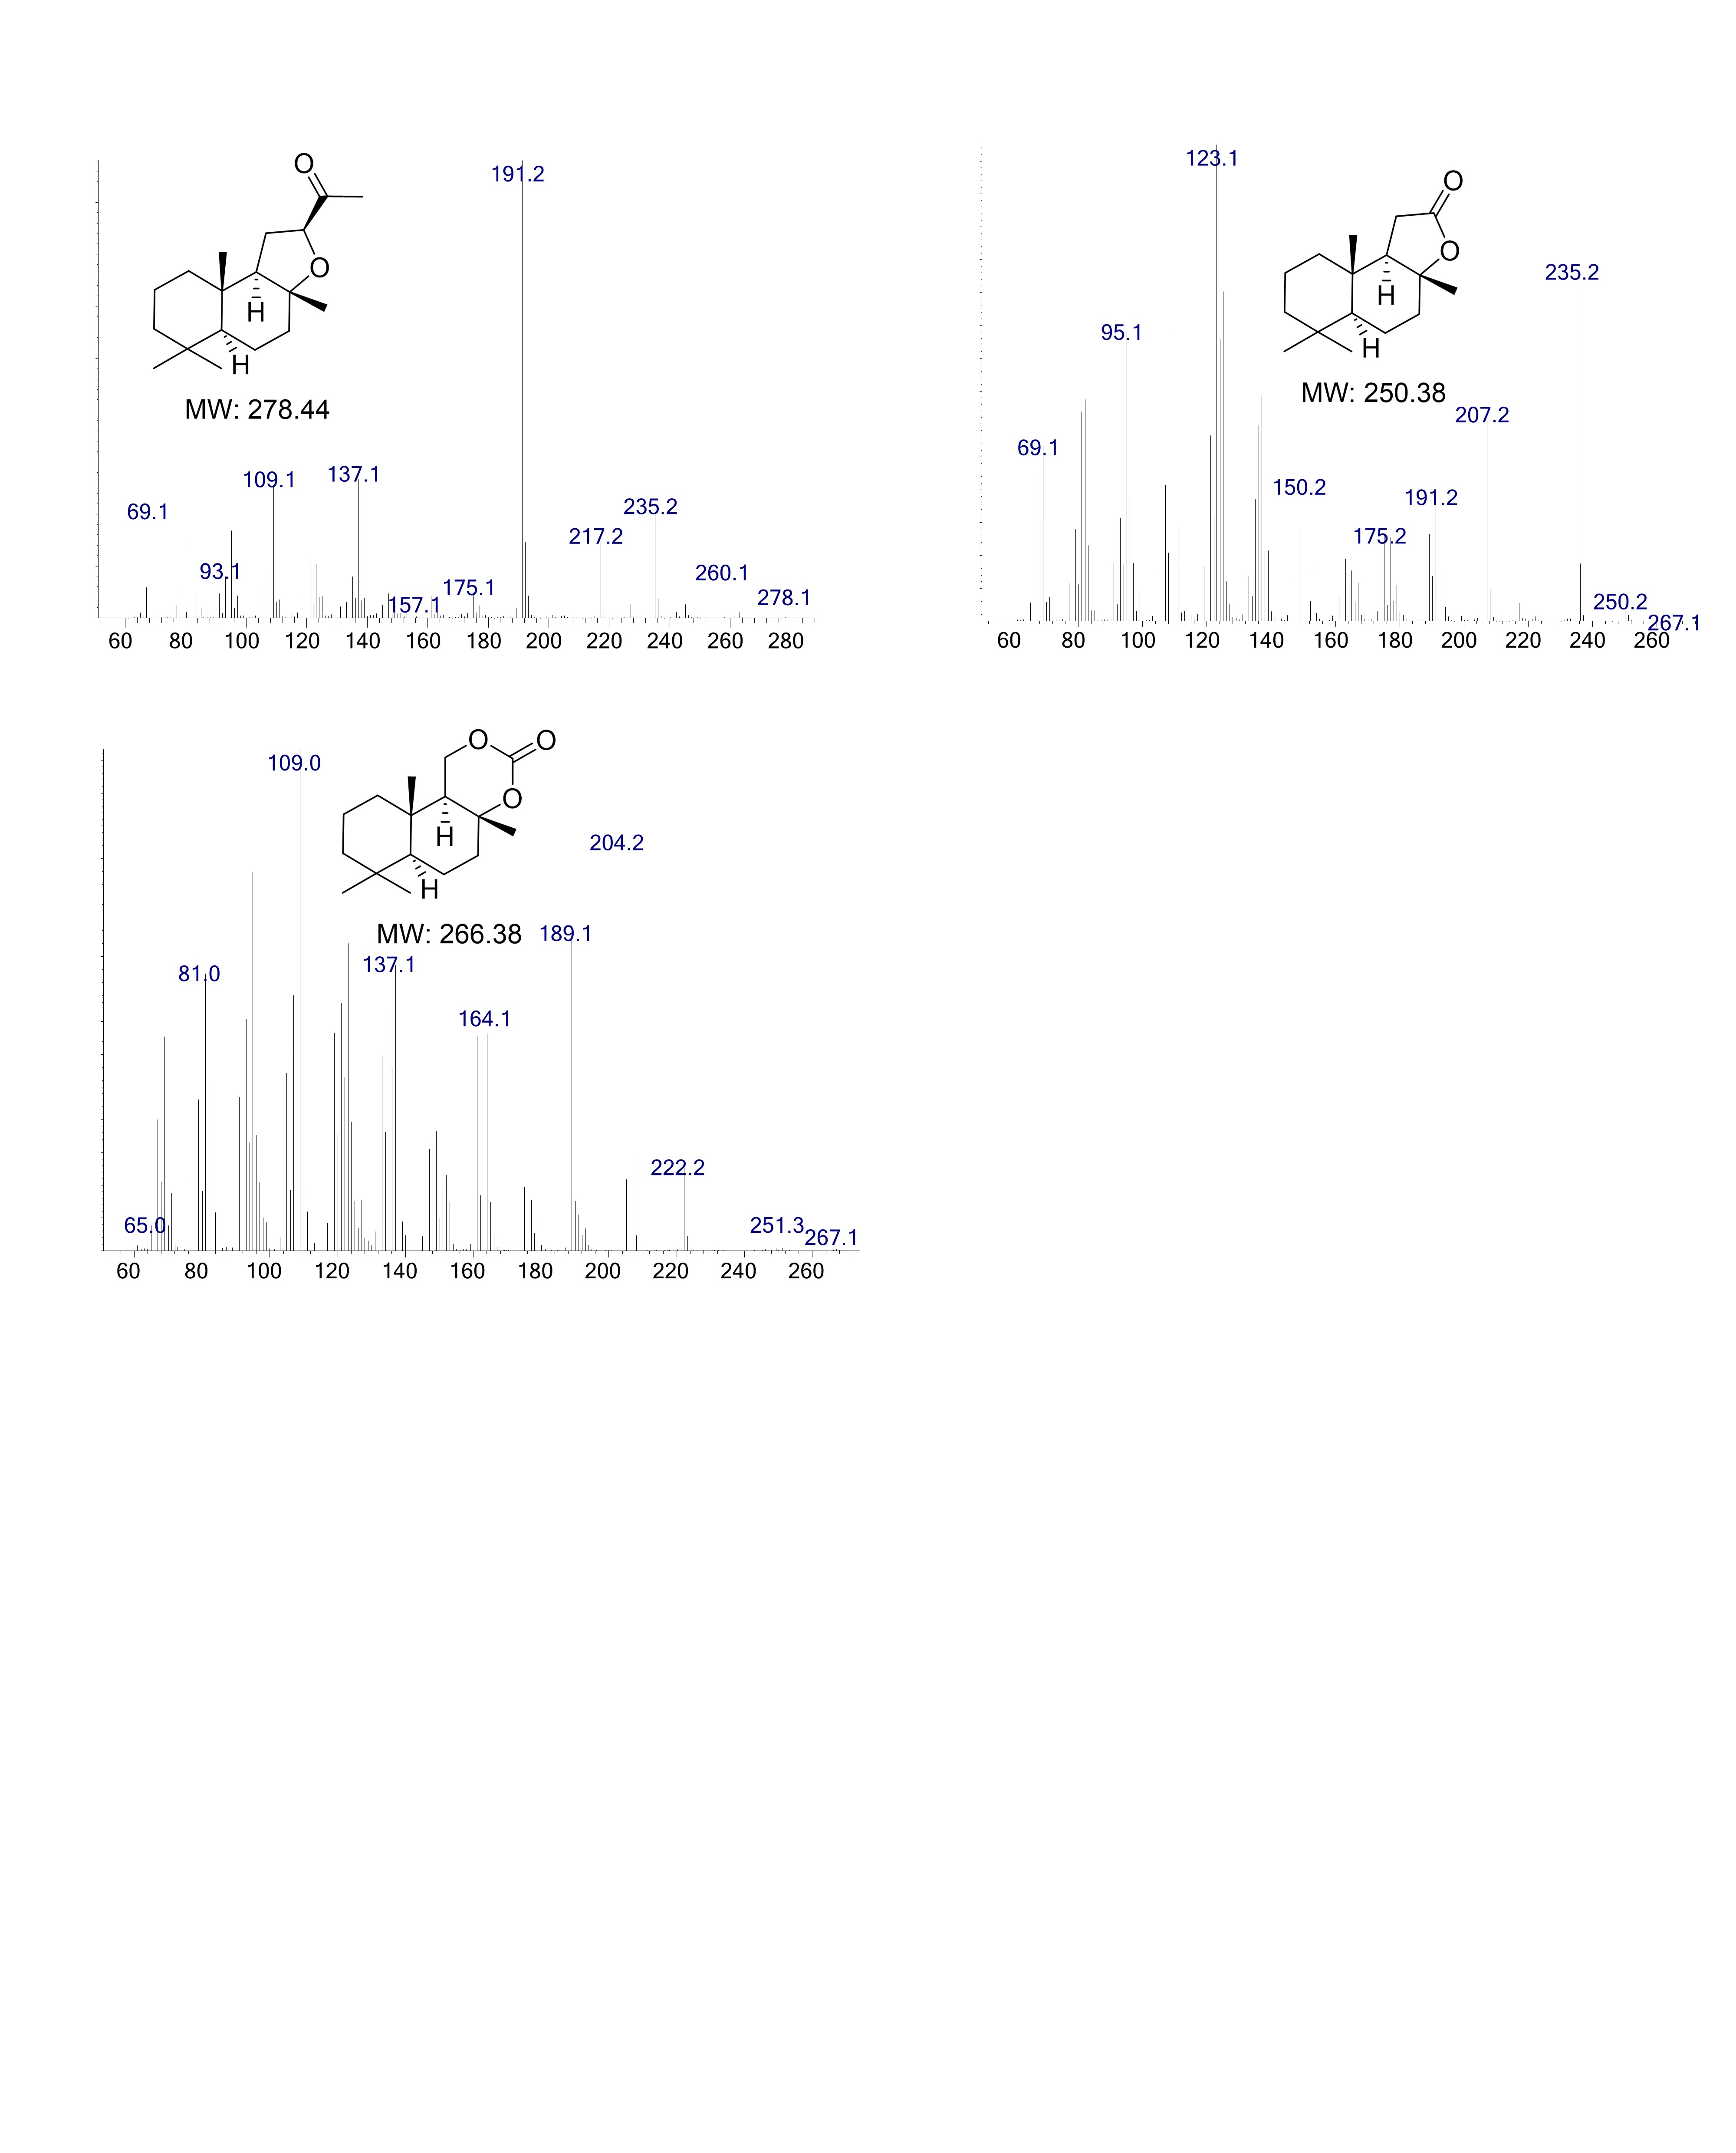


# NMR spectra

**1H of cyclogeranyl acetate hydrate (8), ethyl acetate impurity**


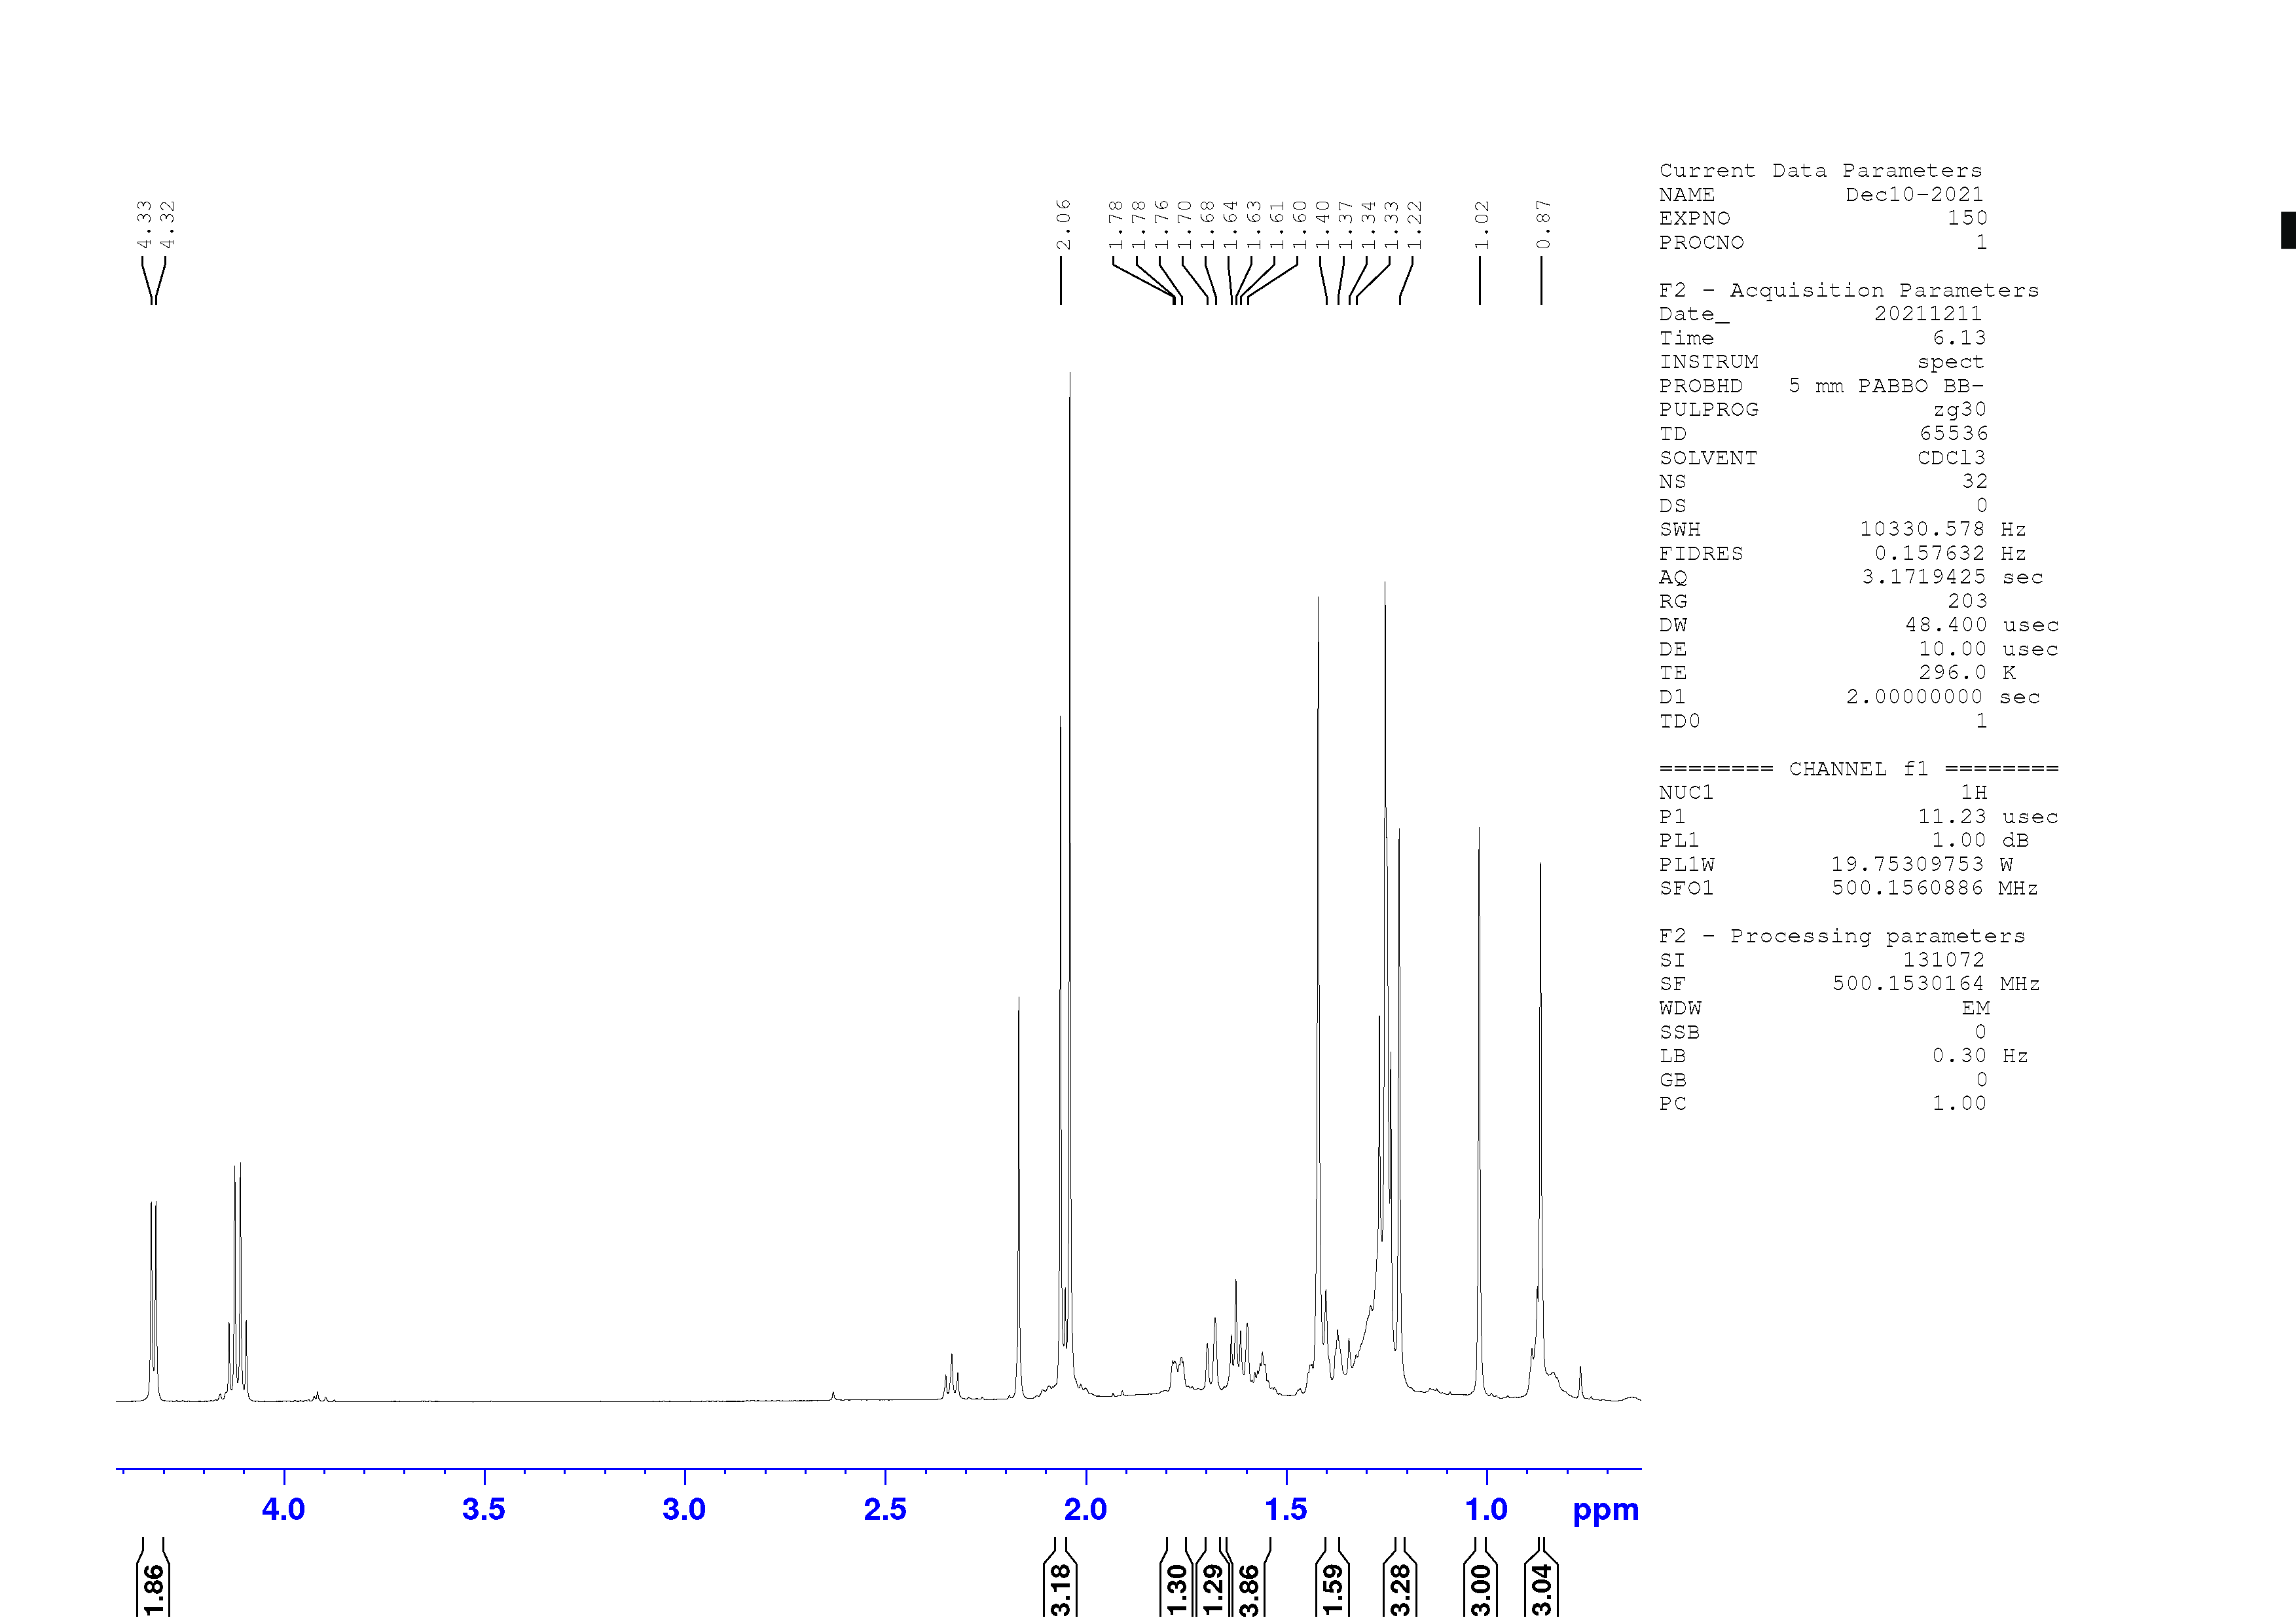


**13C of cyclogeranyl acetate hydrate (8), ethyl acetate impurity**


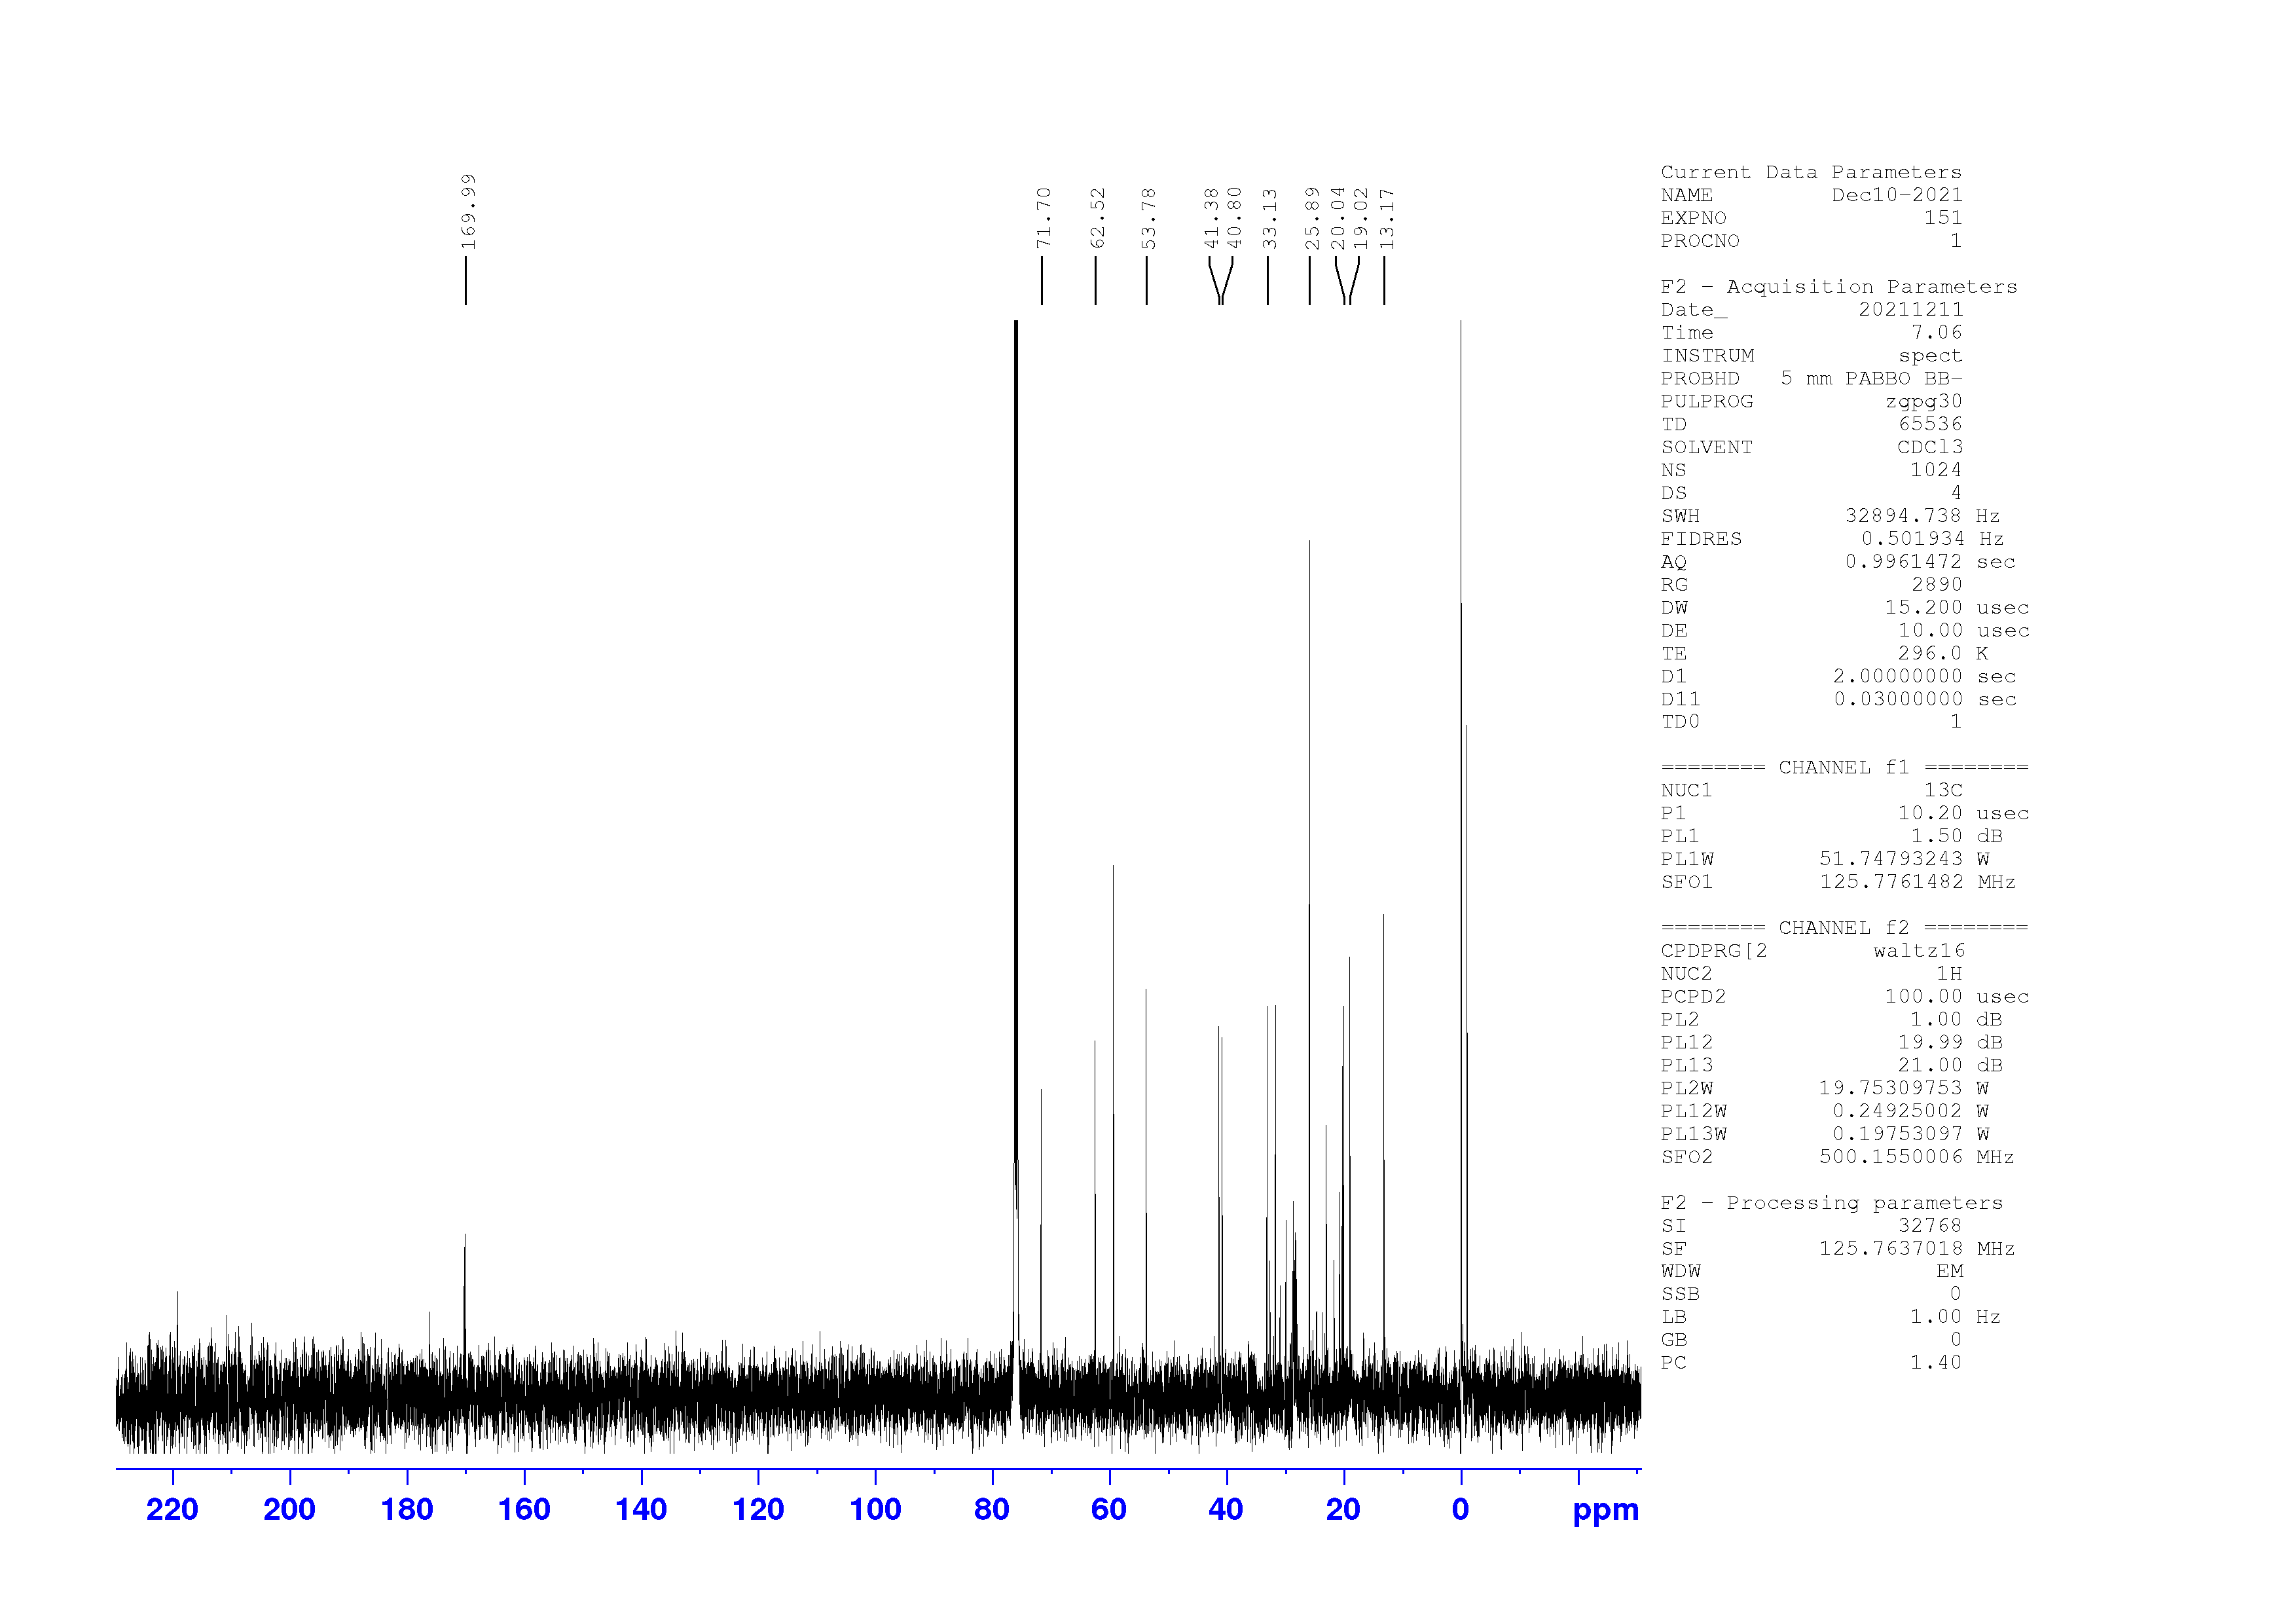


**1H of trans-hexahydrochromene (18)**


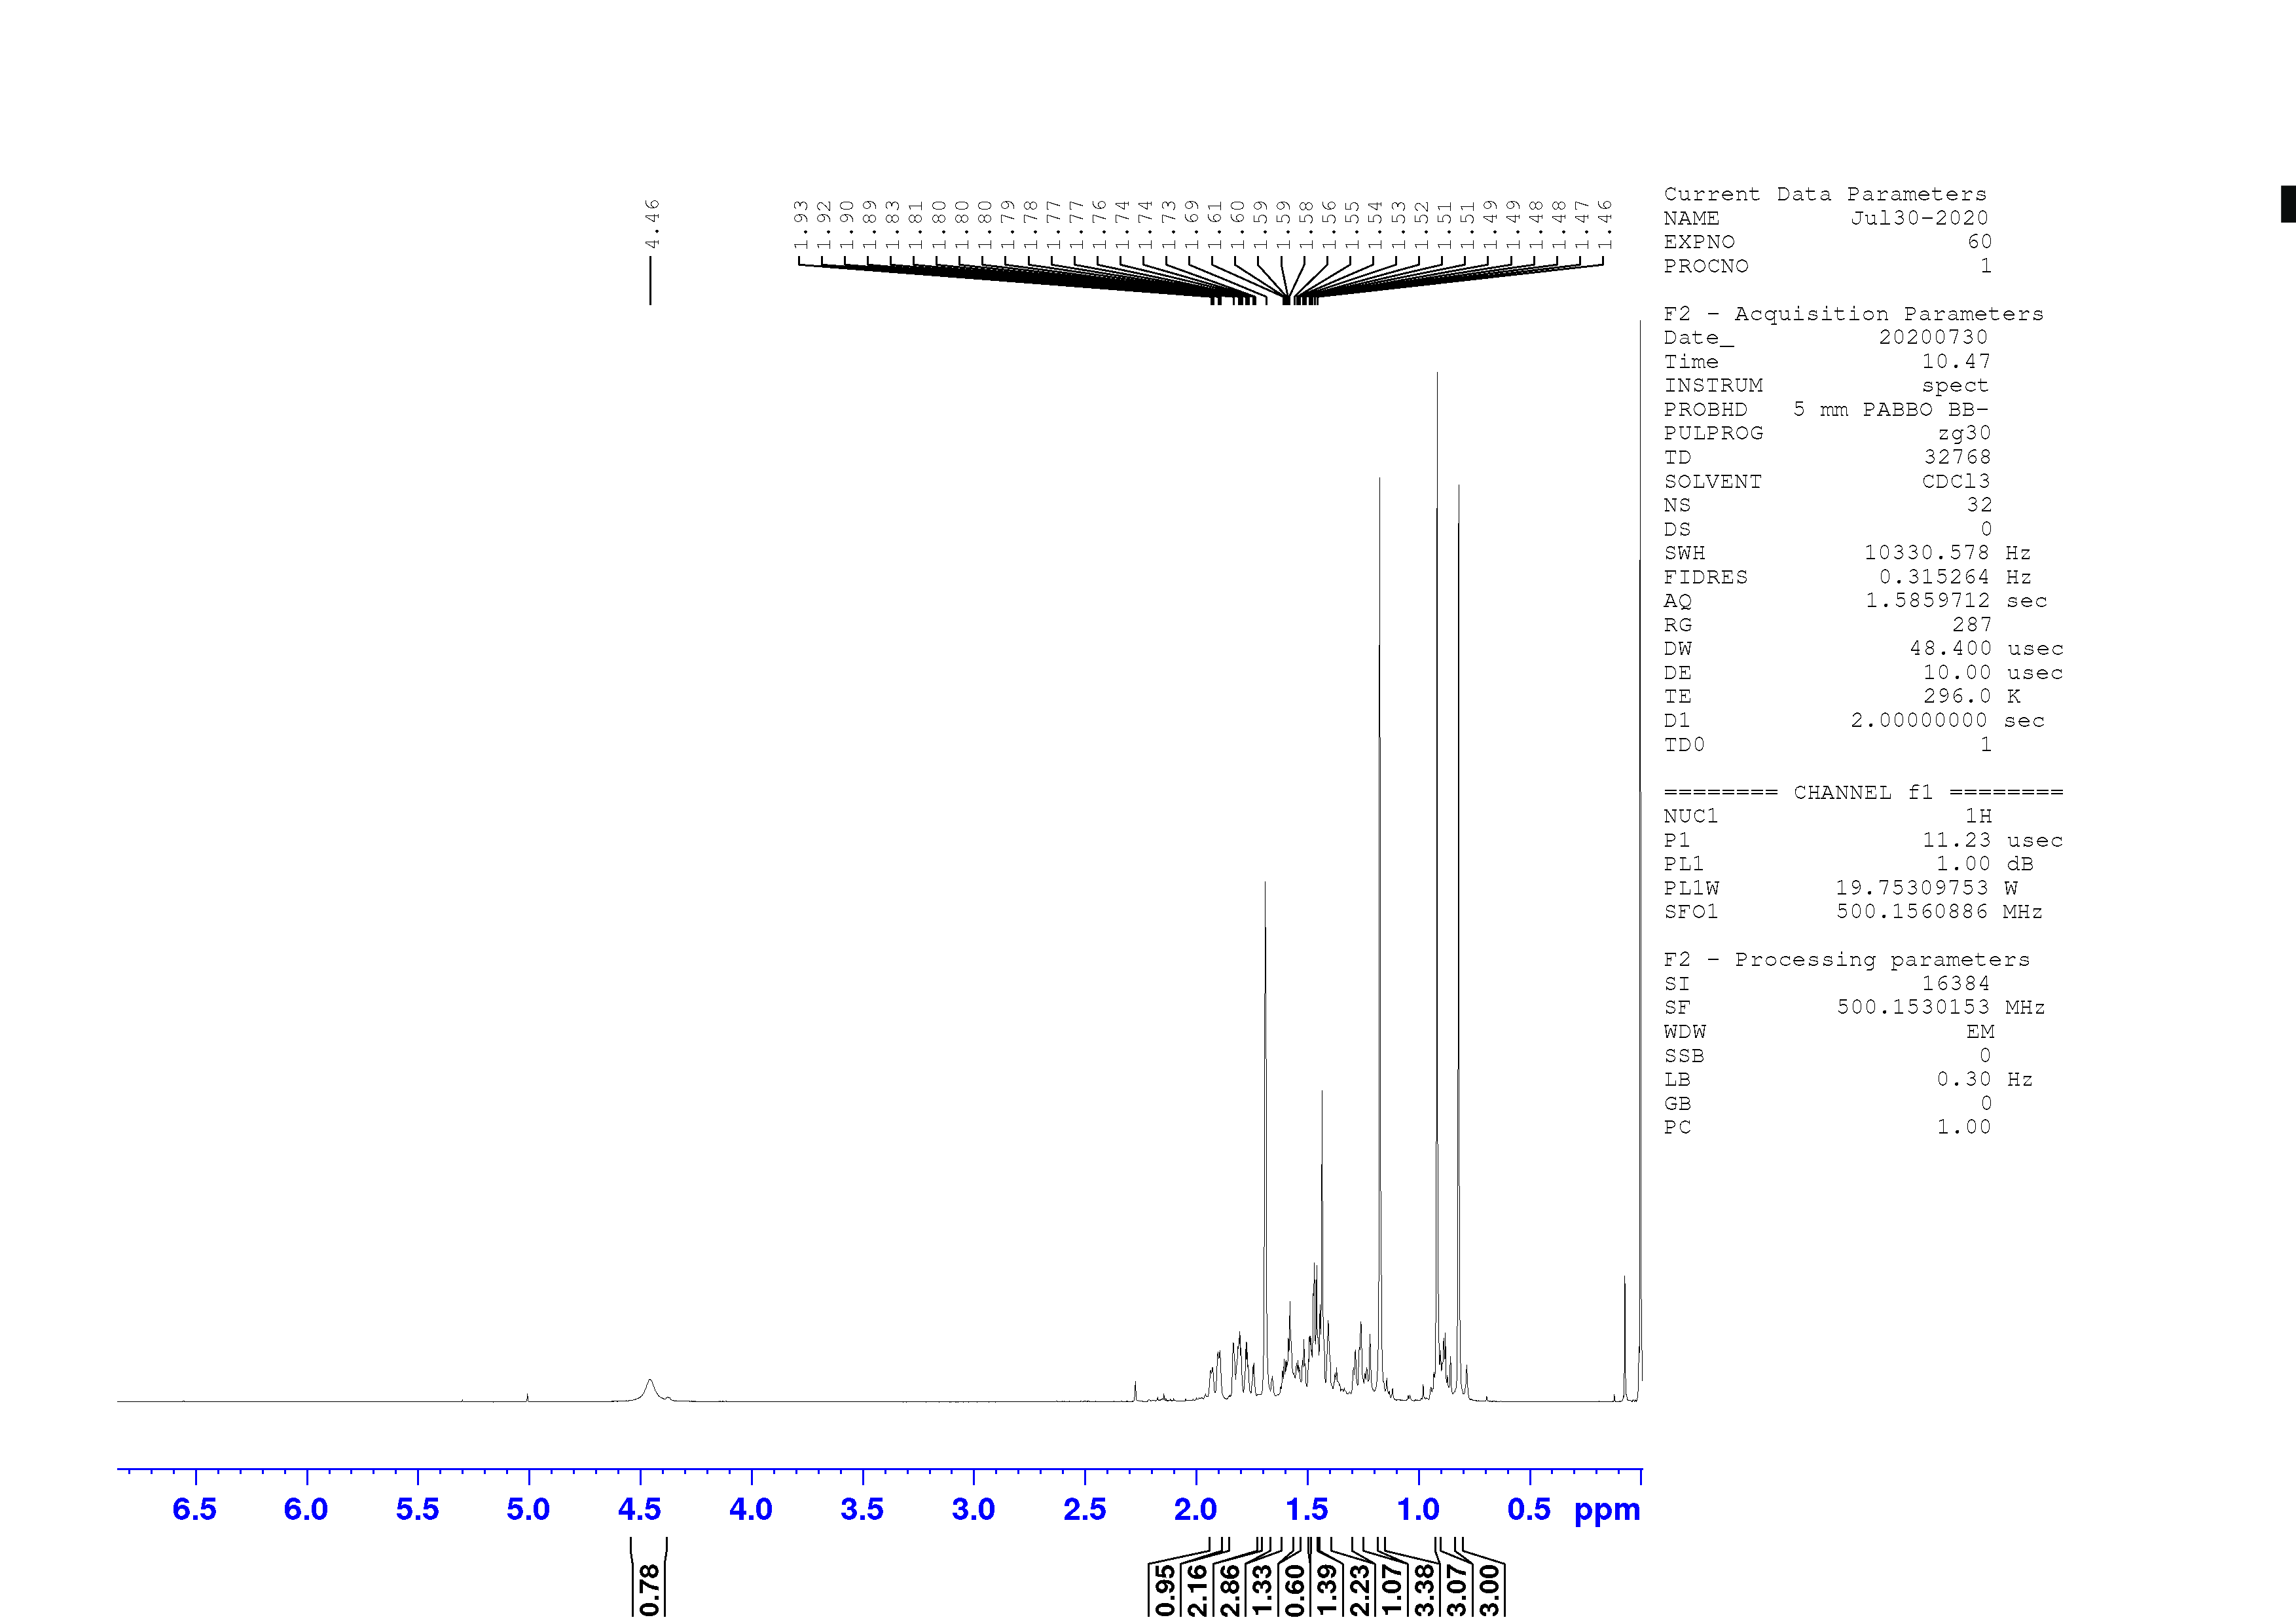


**13C of trans-hexahydrochromene (18)**


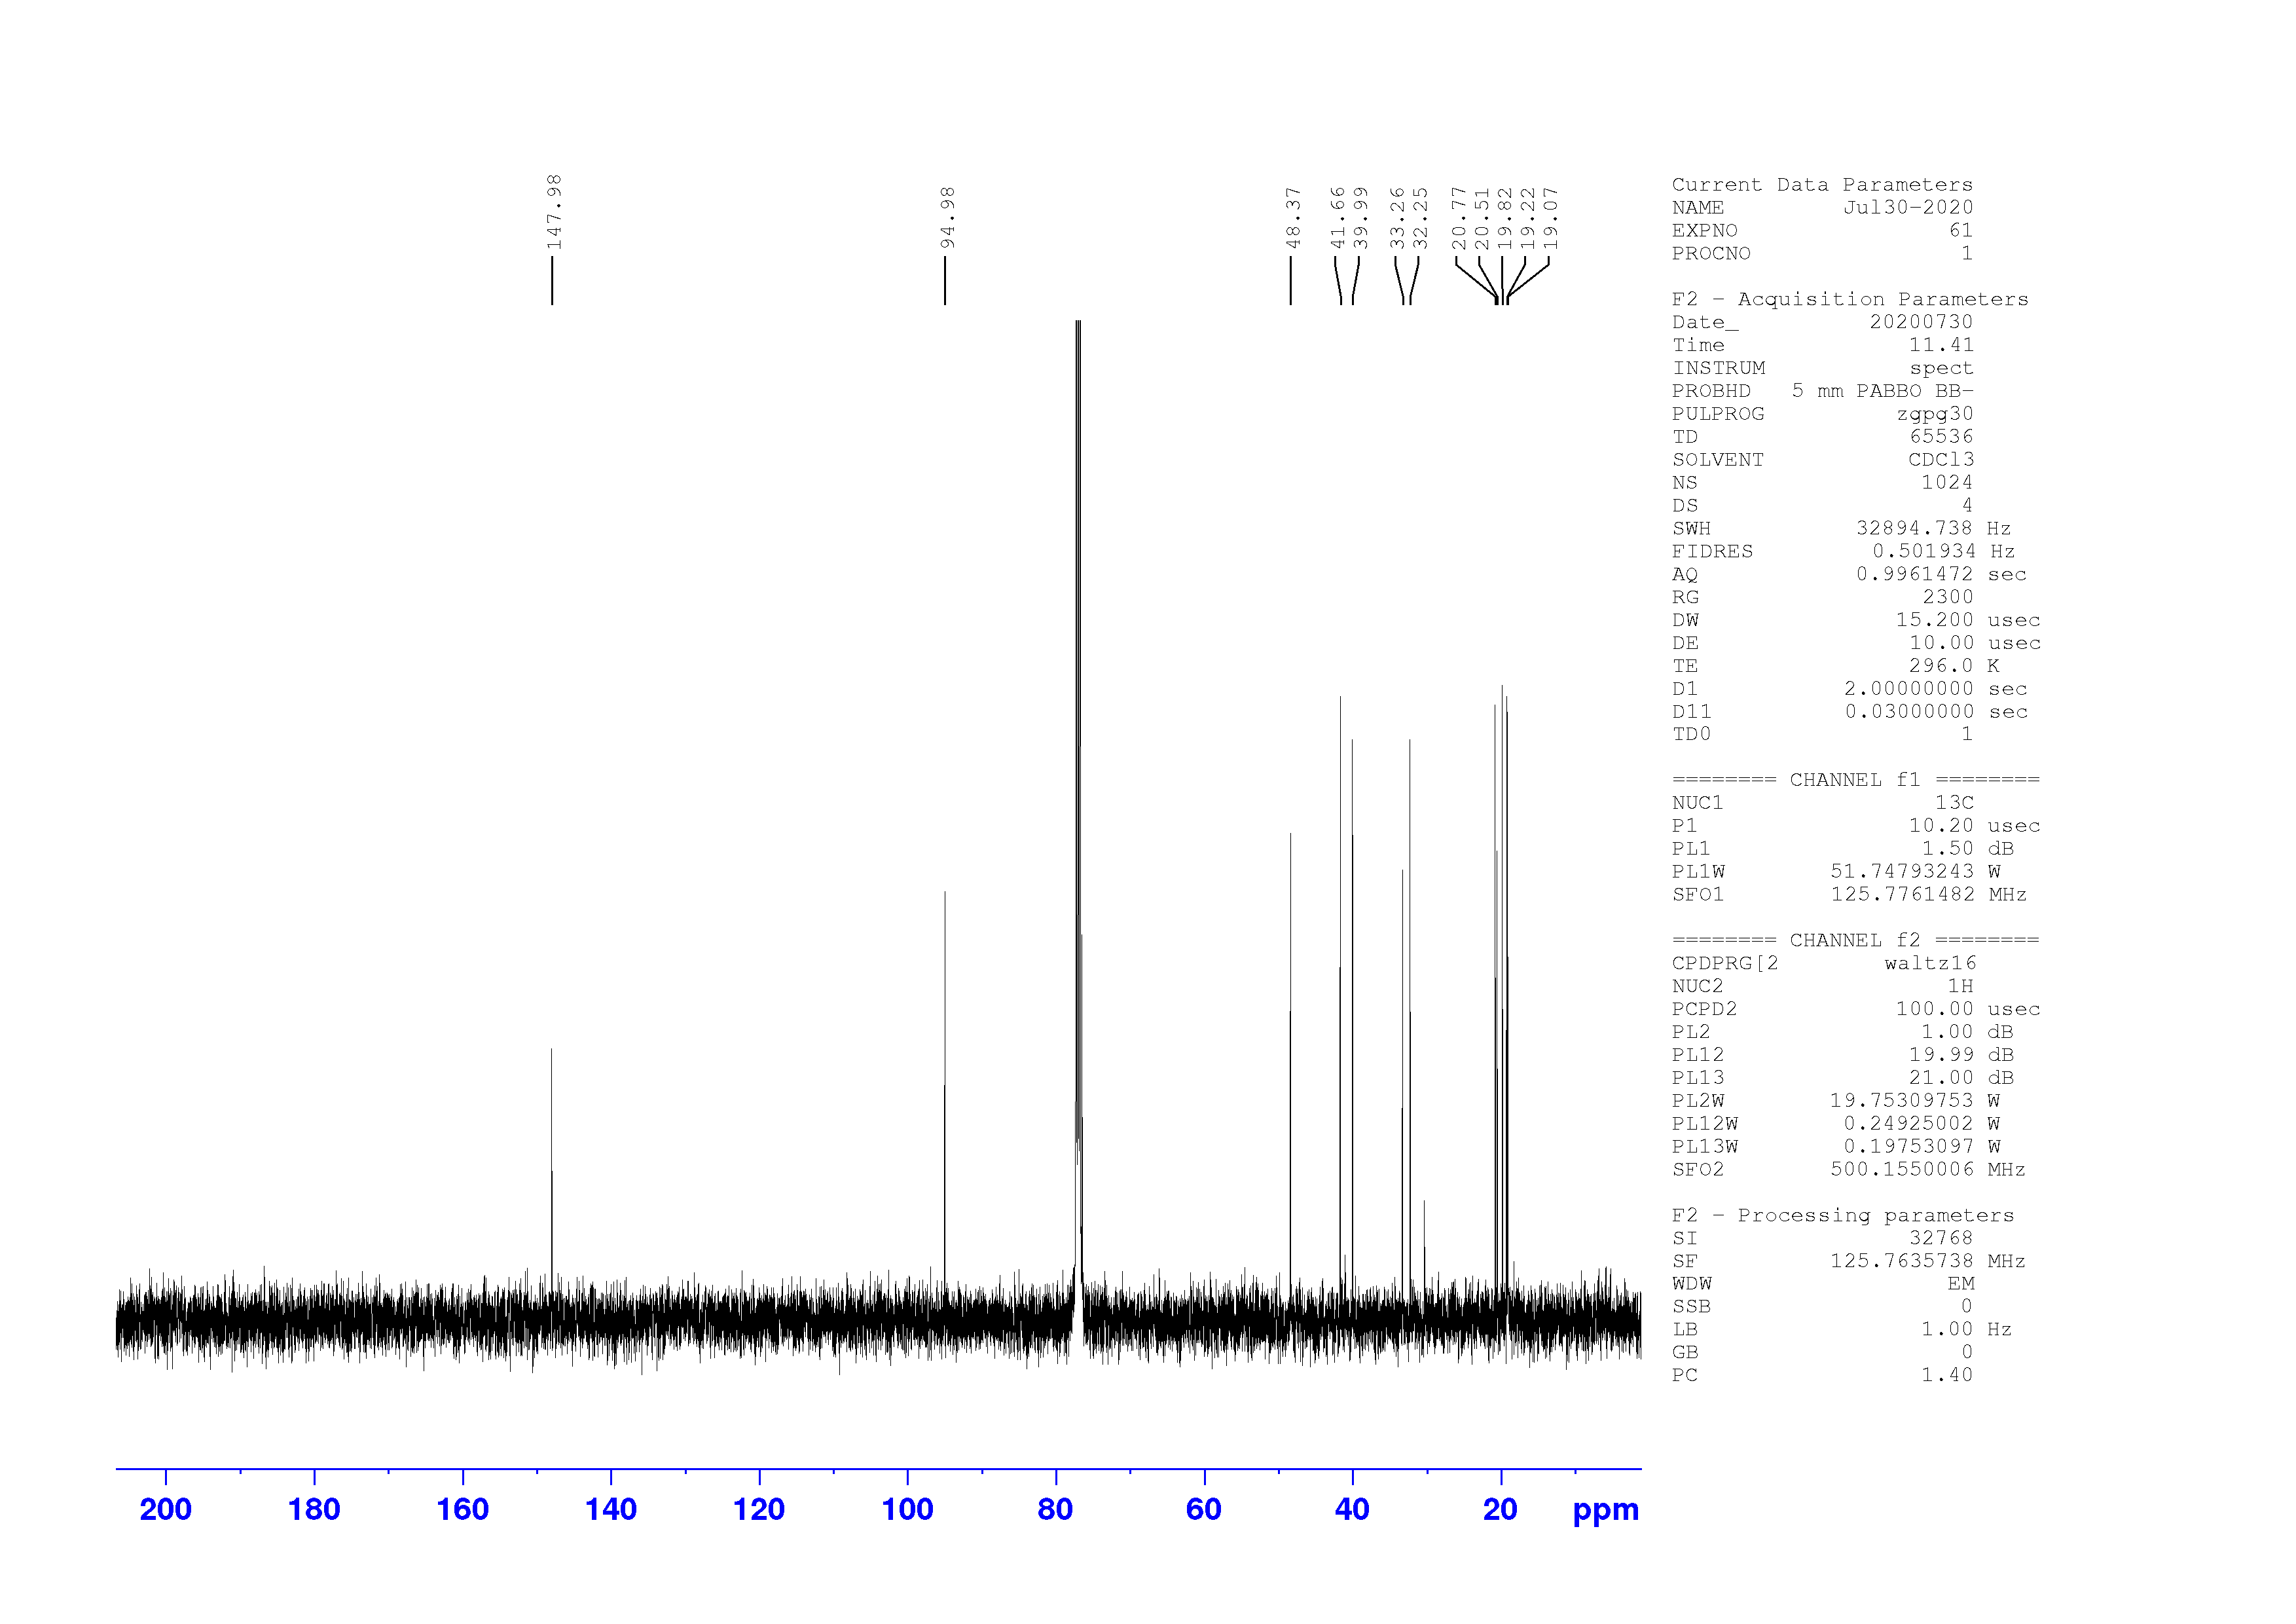


**1H of cis-hexahydrochromene (23), (cyclohexane impurity)**


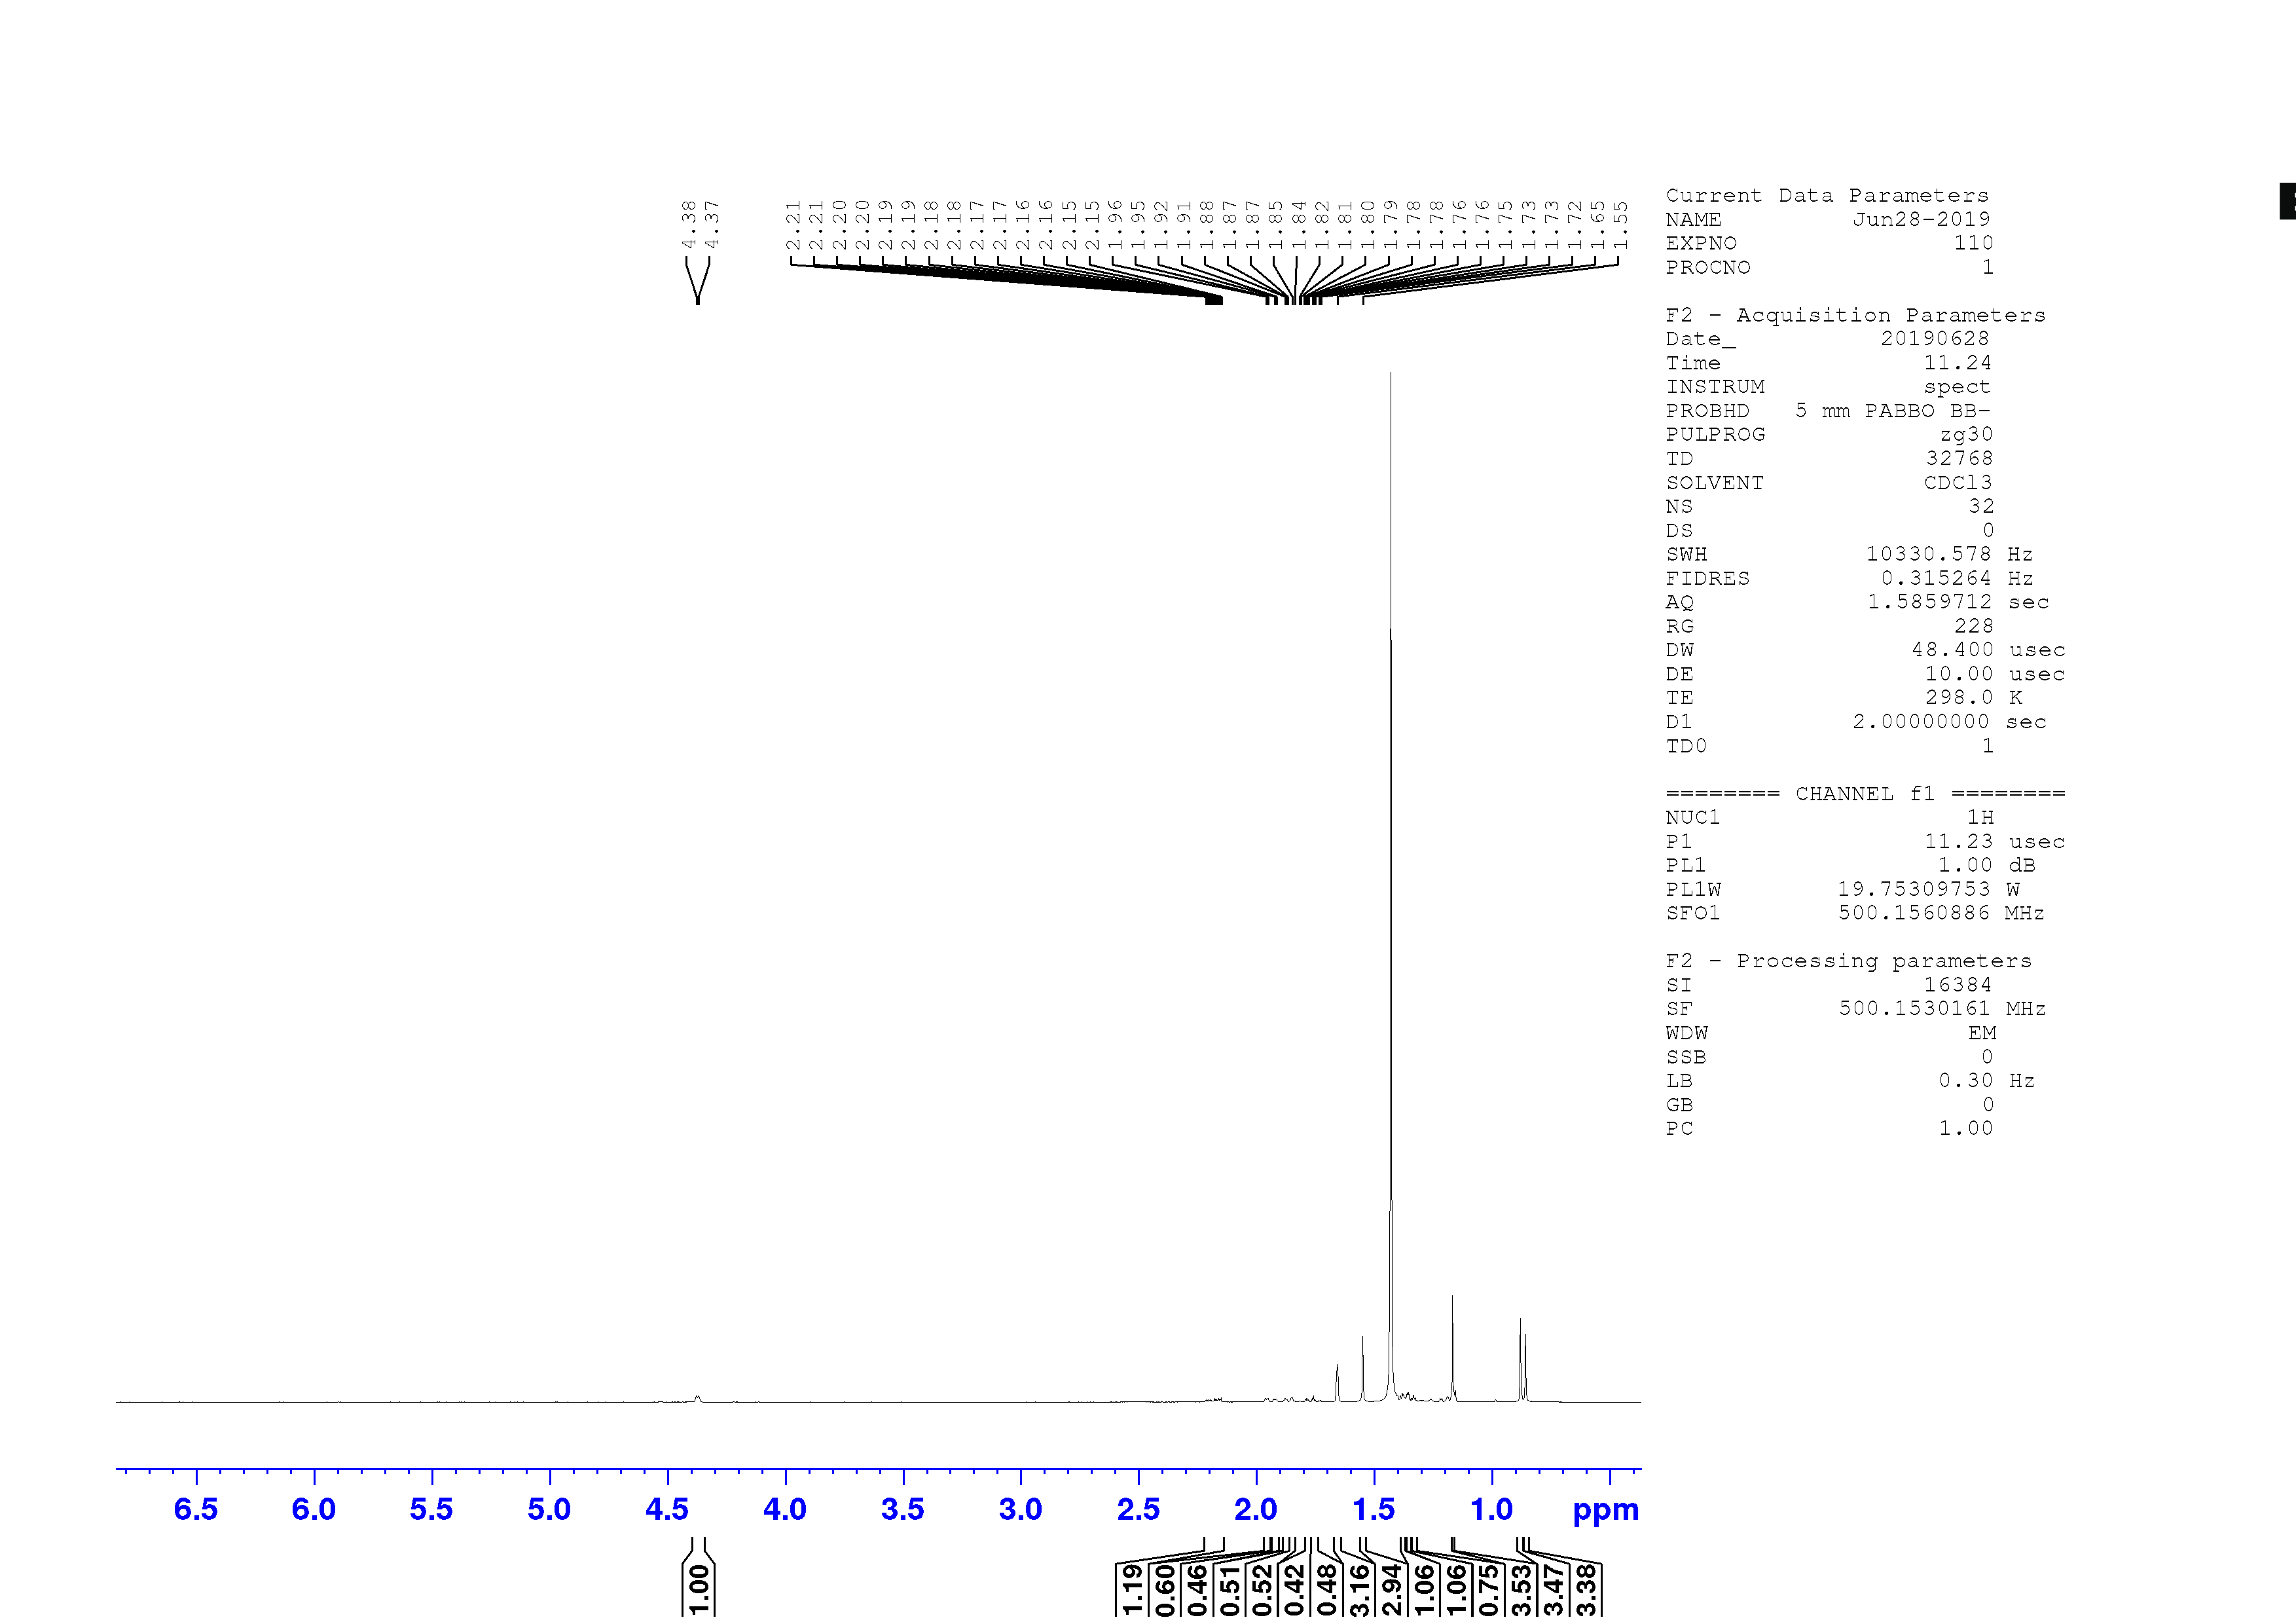


**13C of cis-hexahydrochromene (23), (cyclohexane impurity)**


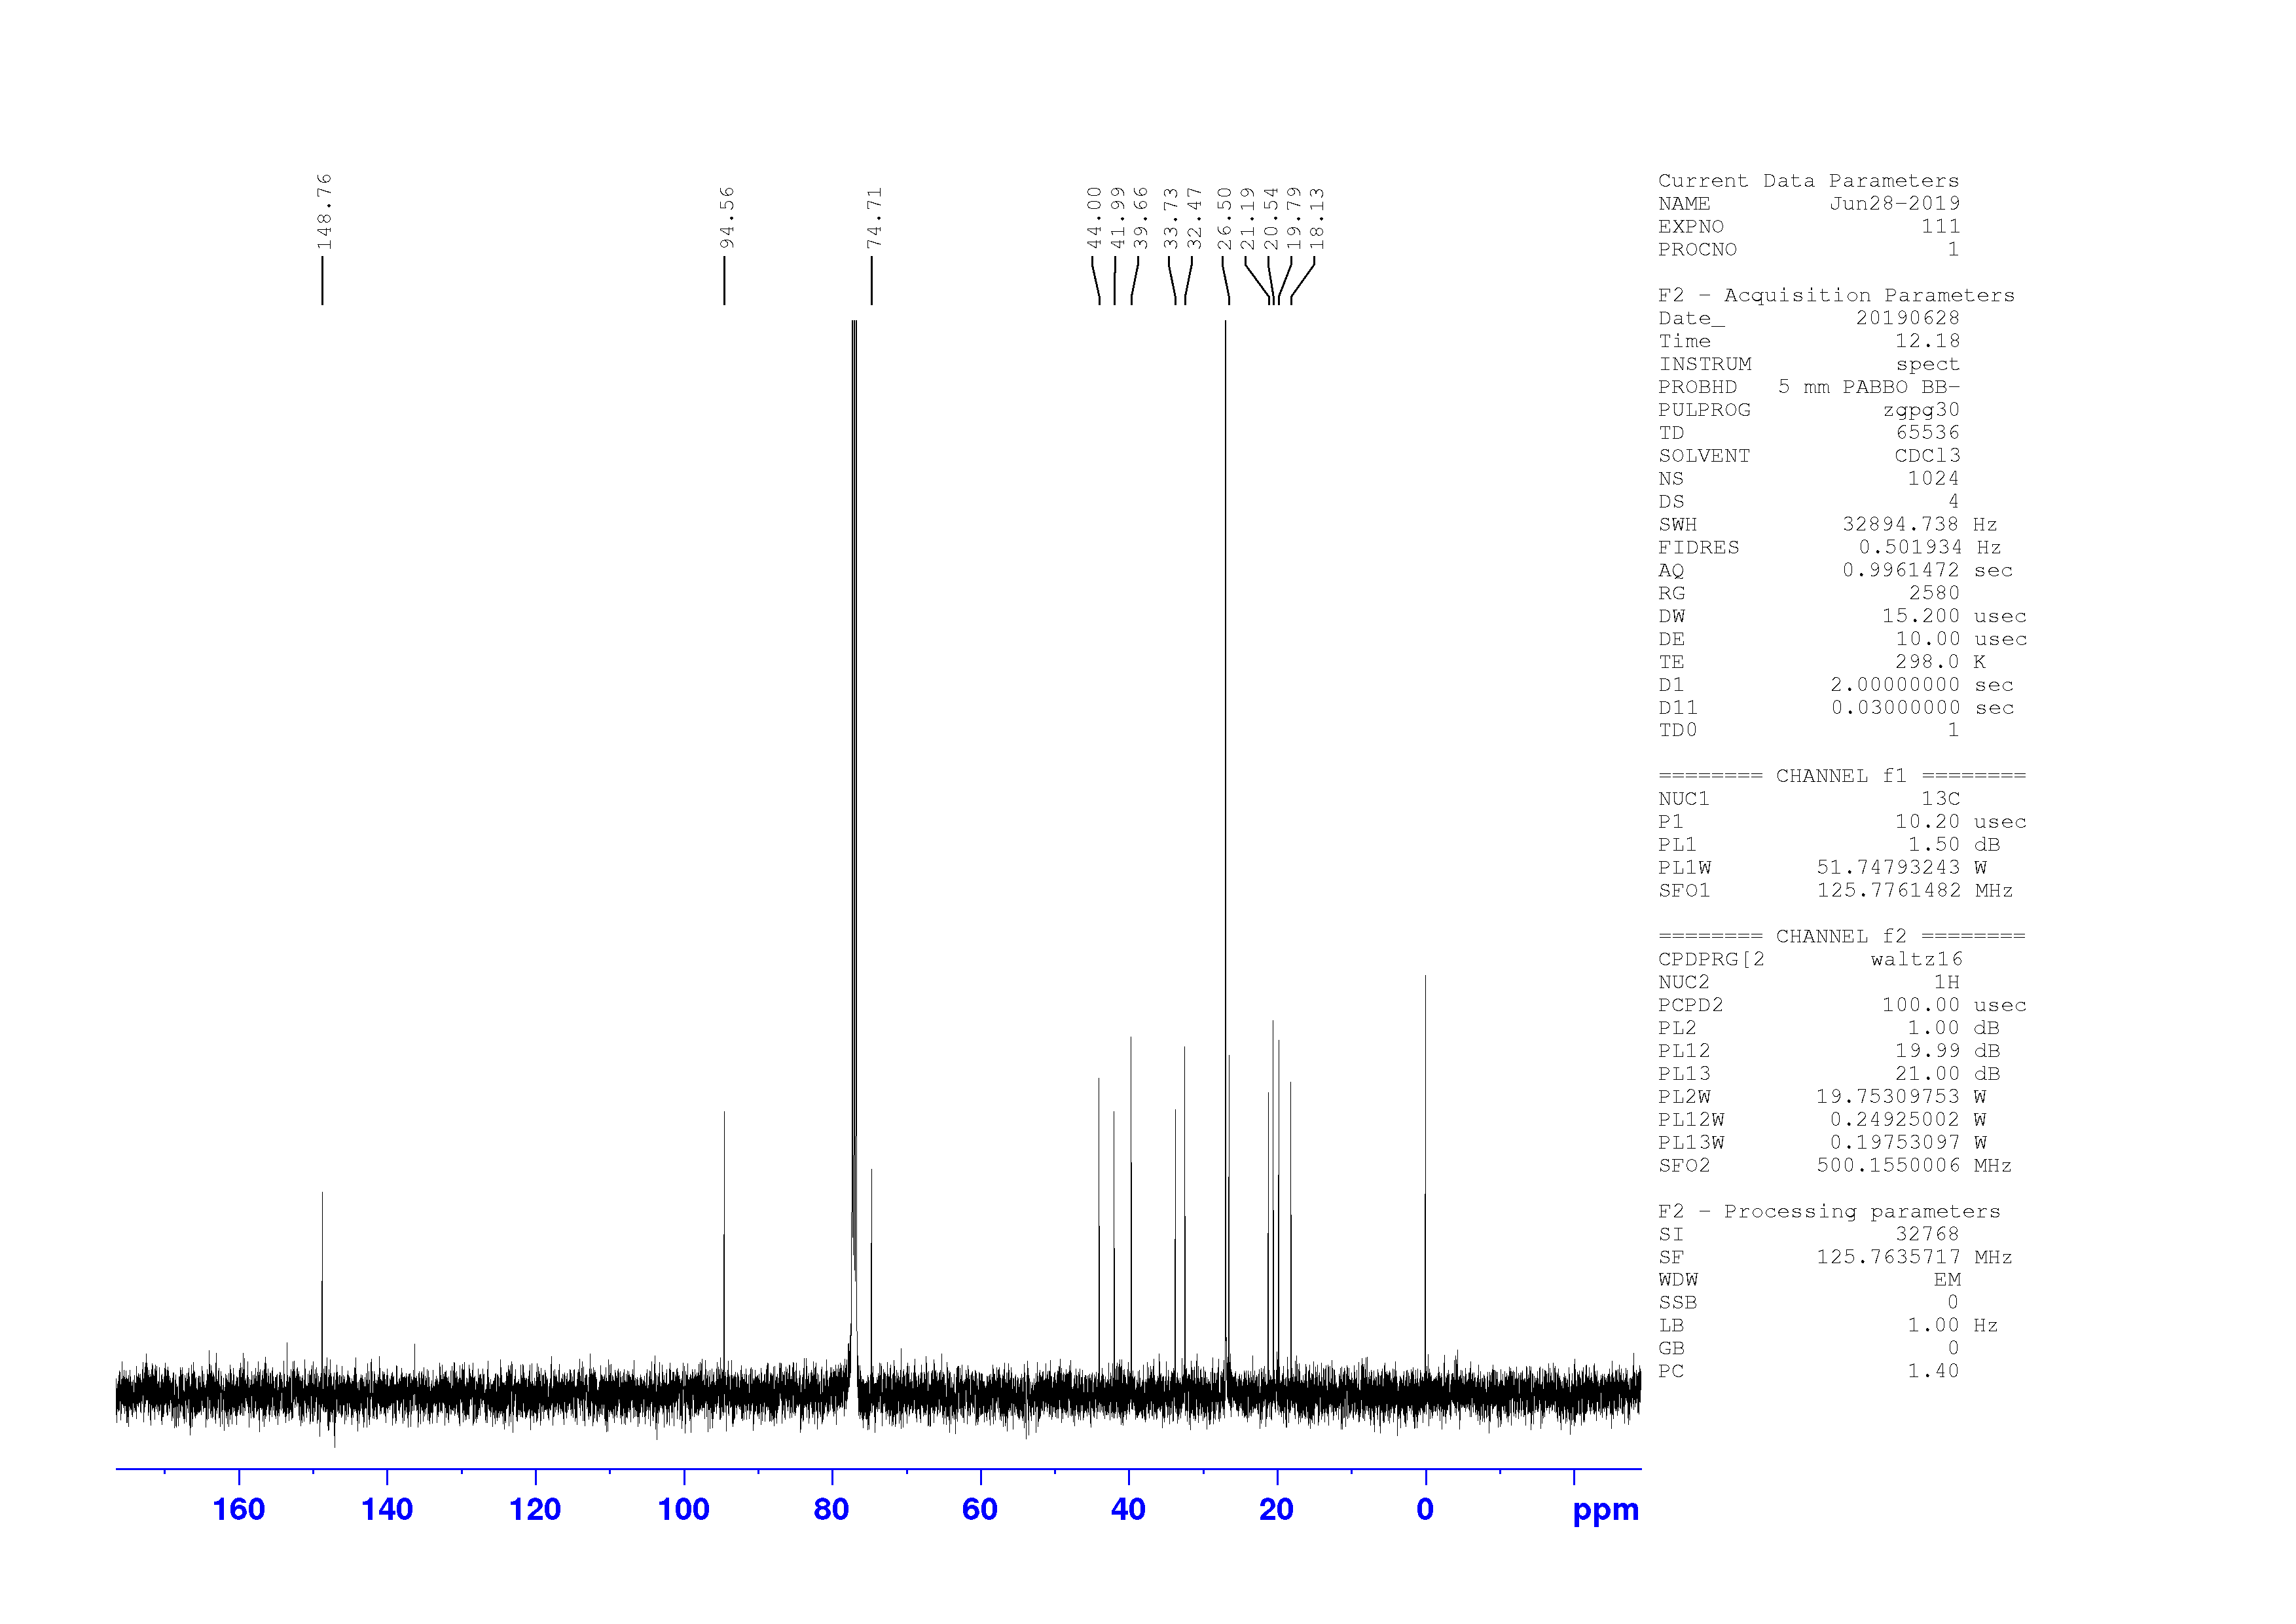


**1H of γ-(–)-dihydroionone (24)**


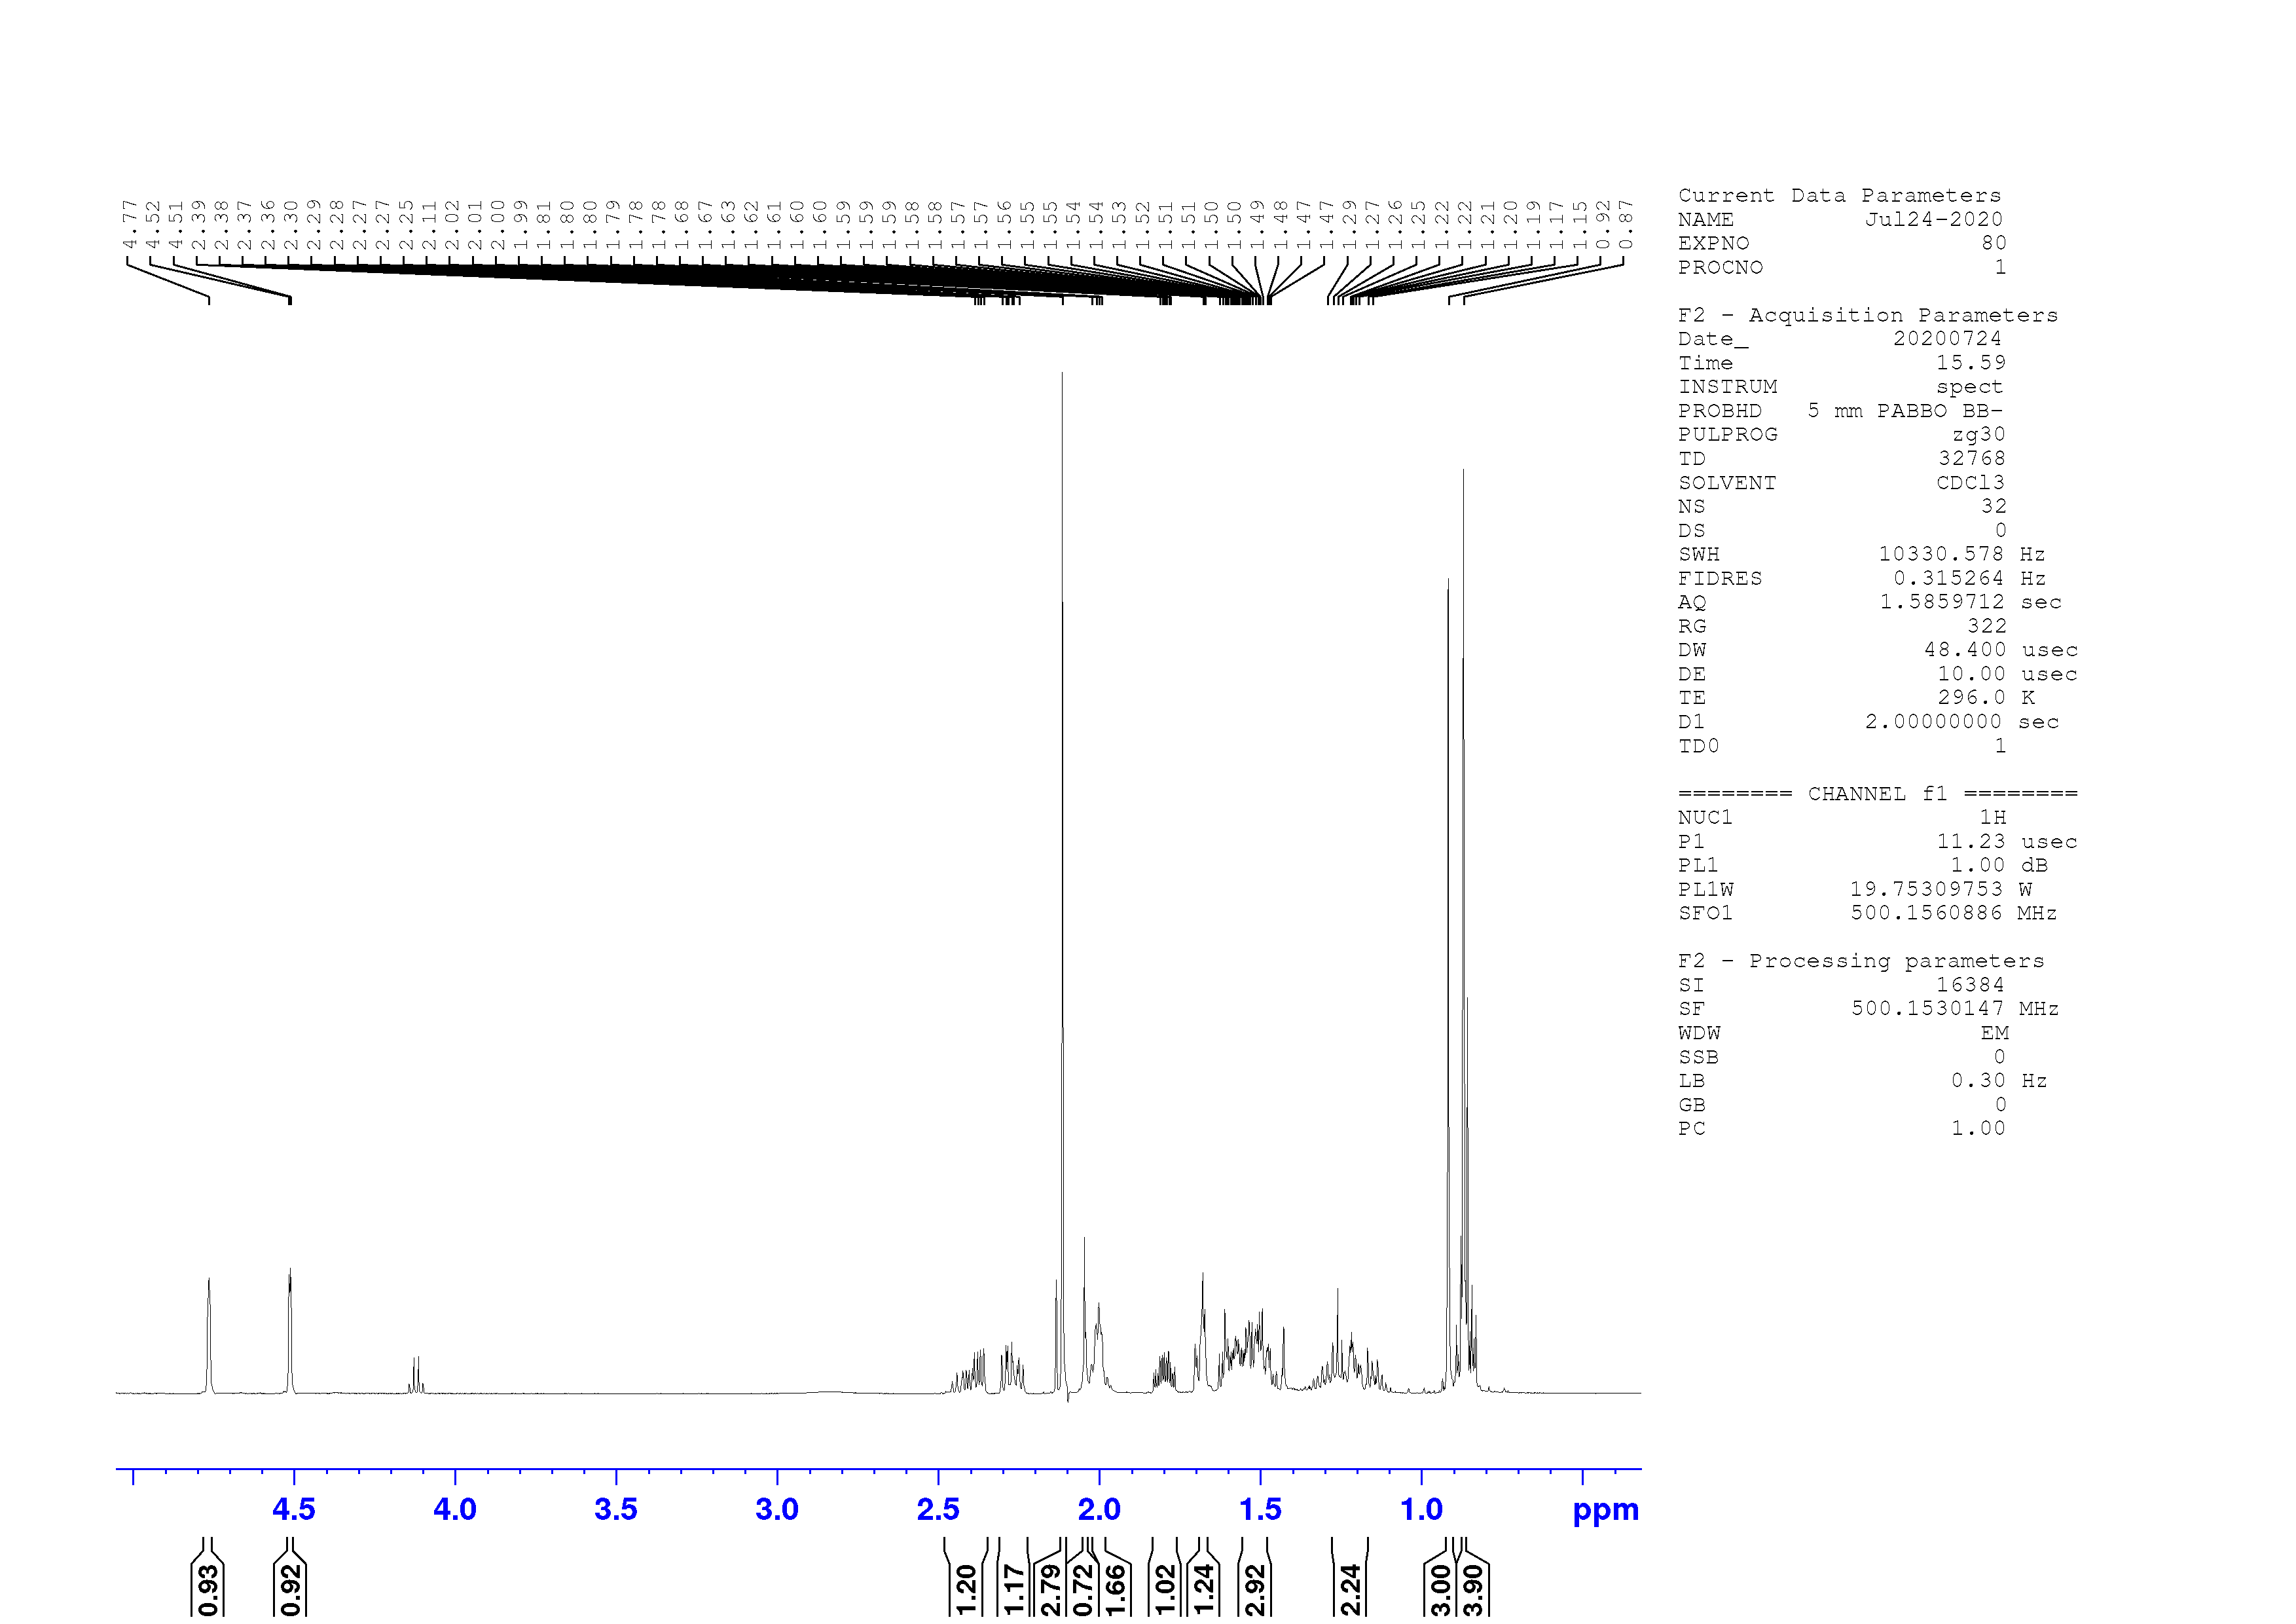


**13C of γ-(–)-dihydroionone (24)**


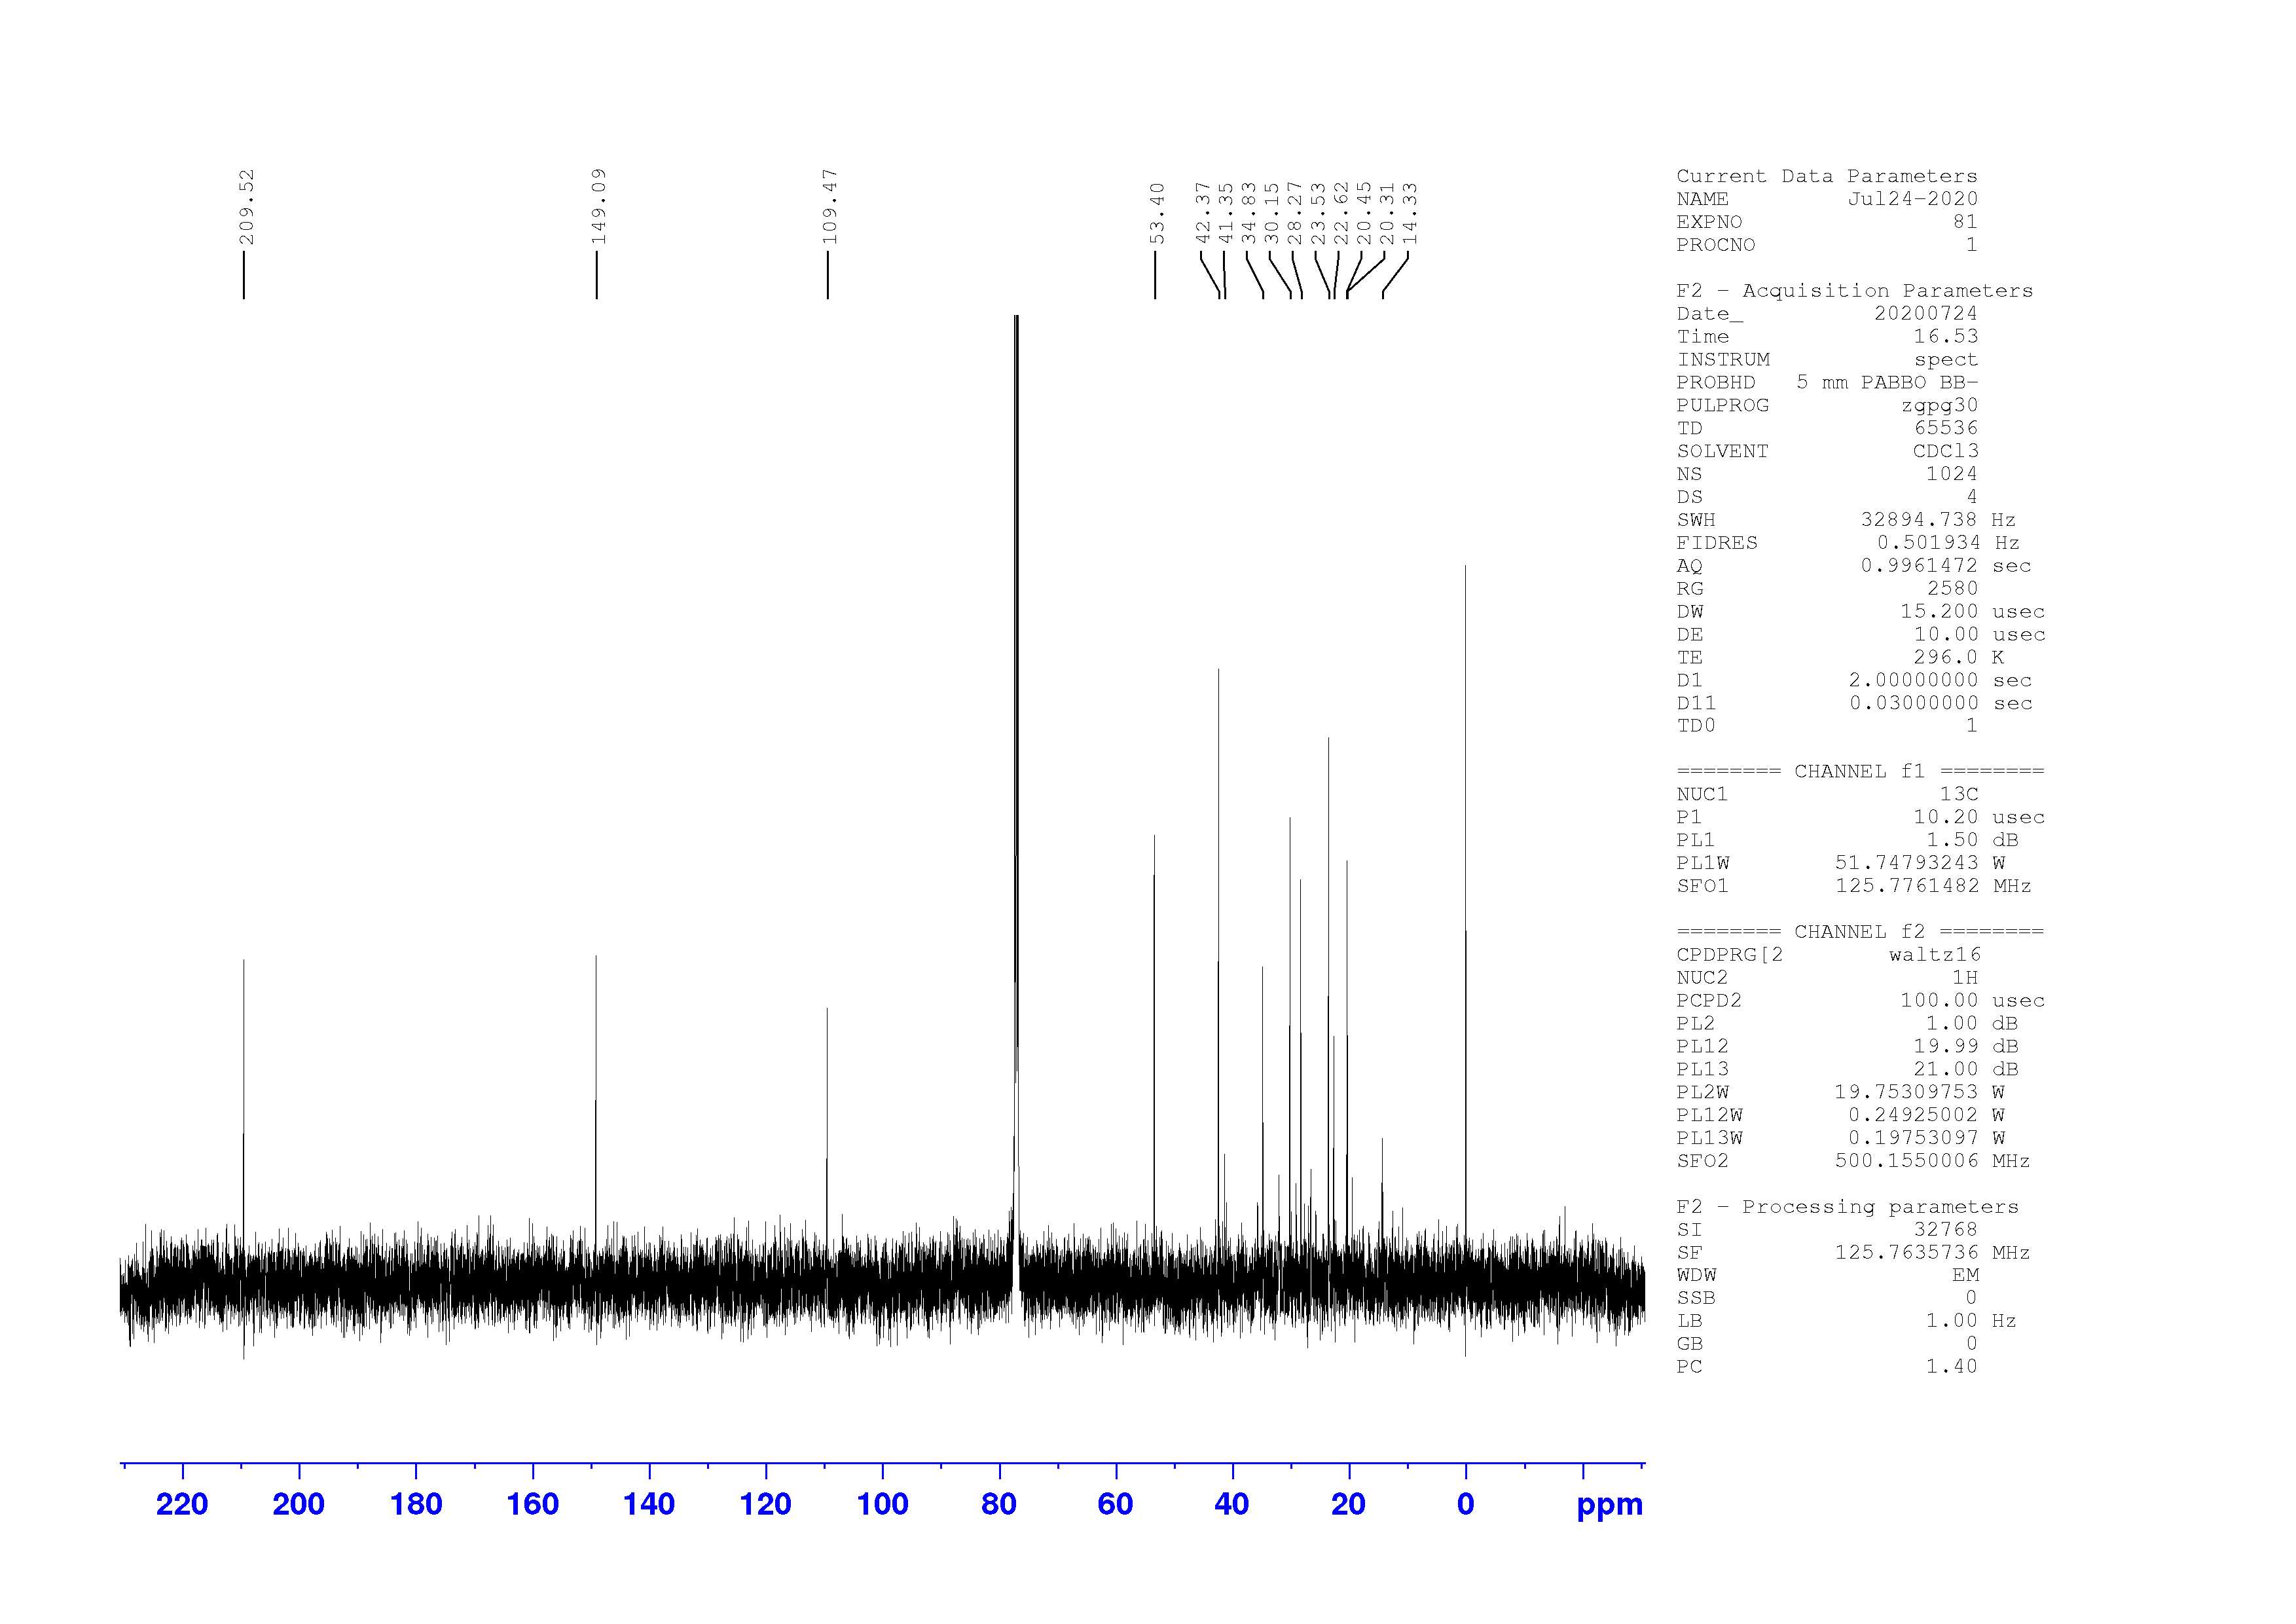


**1H of sclareoloxide (14)**


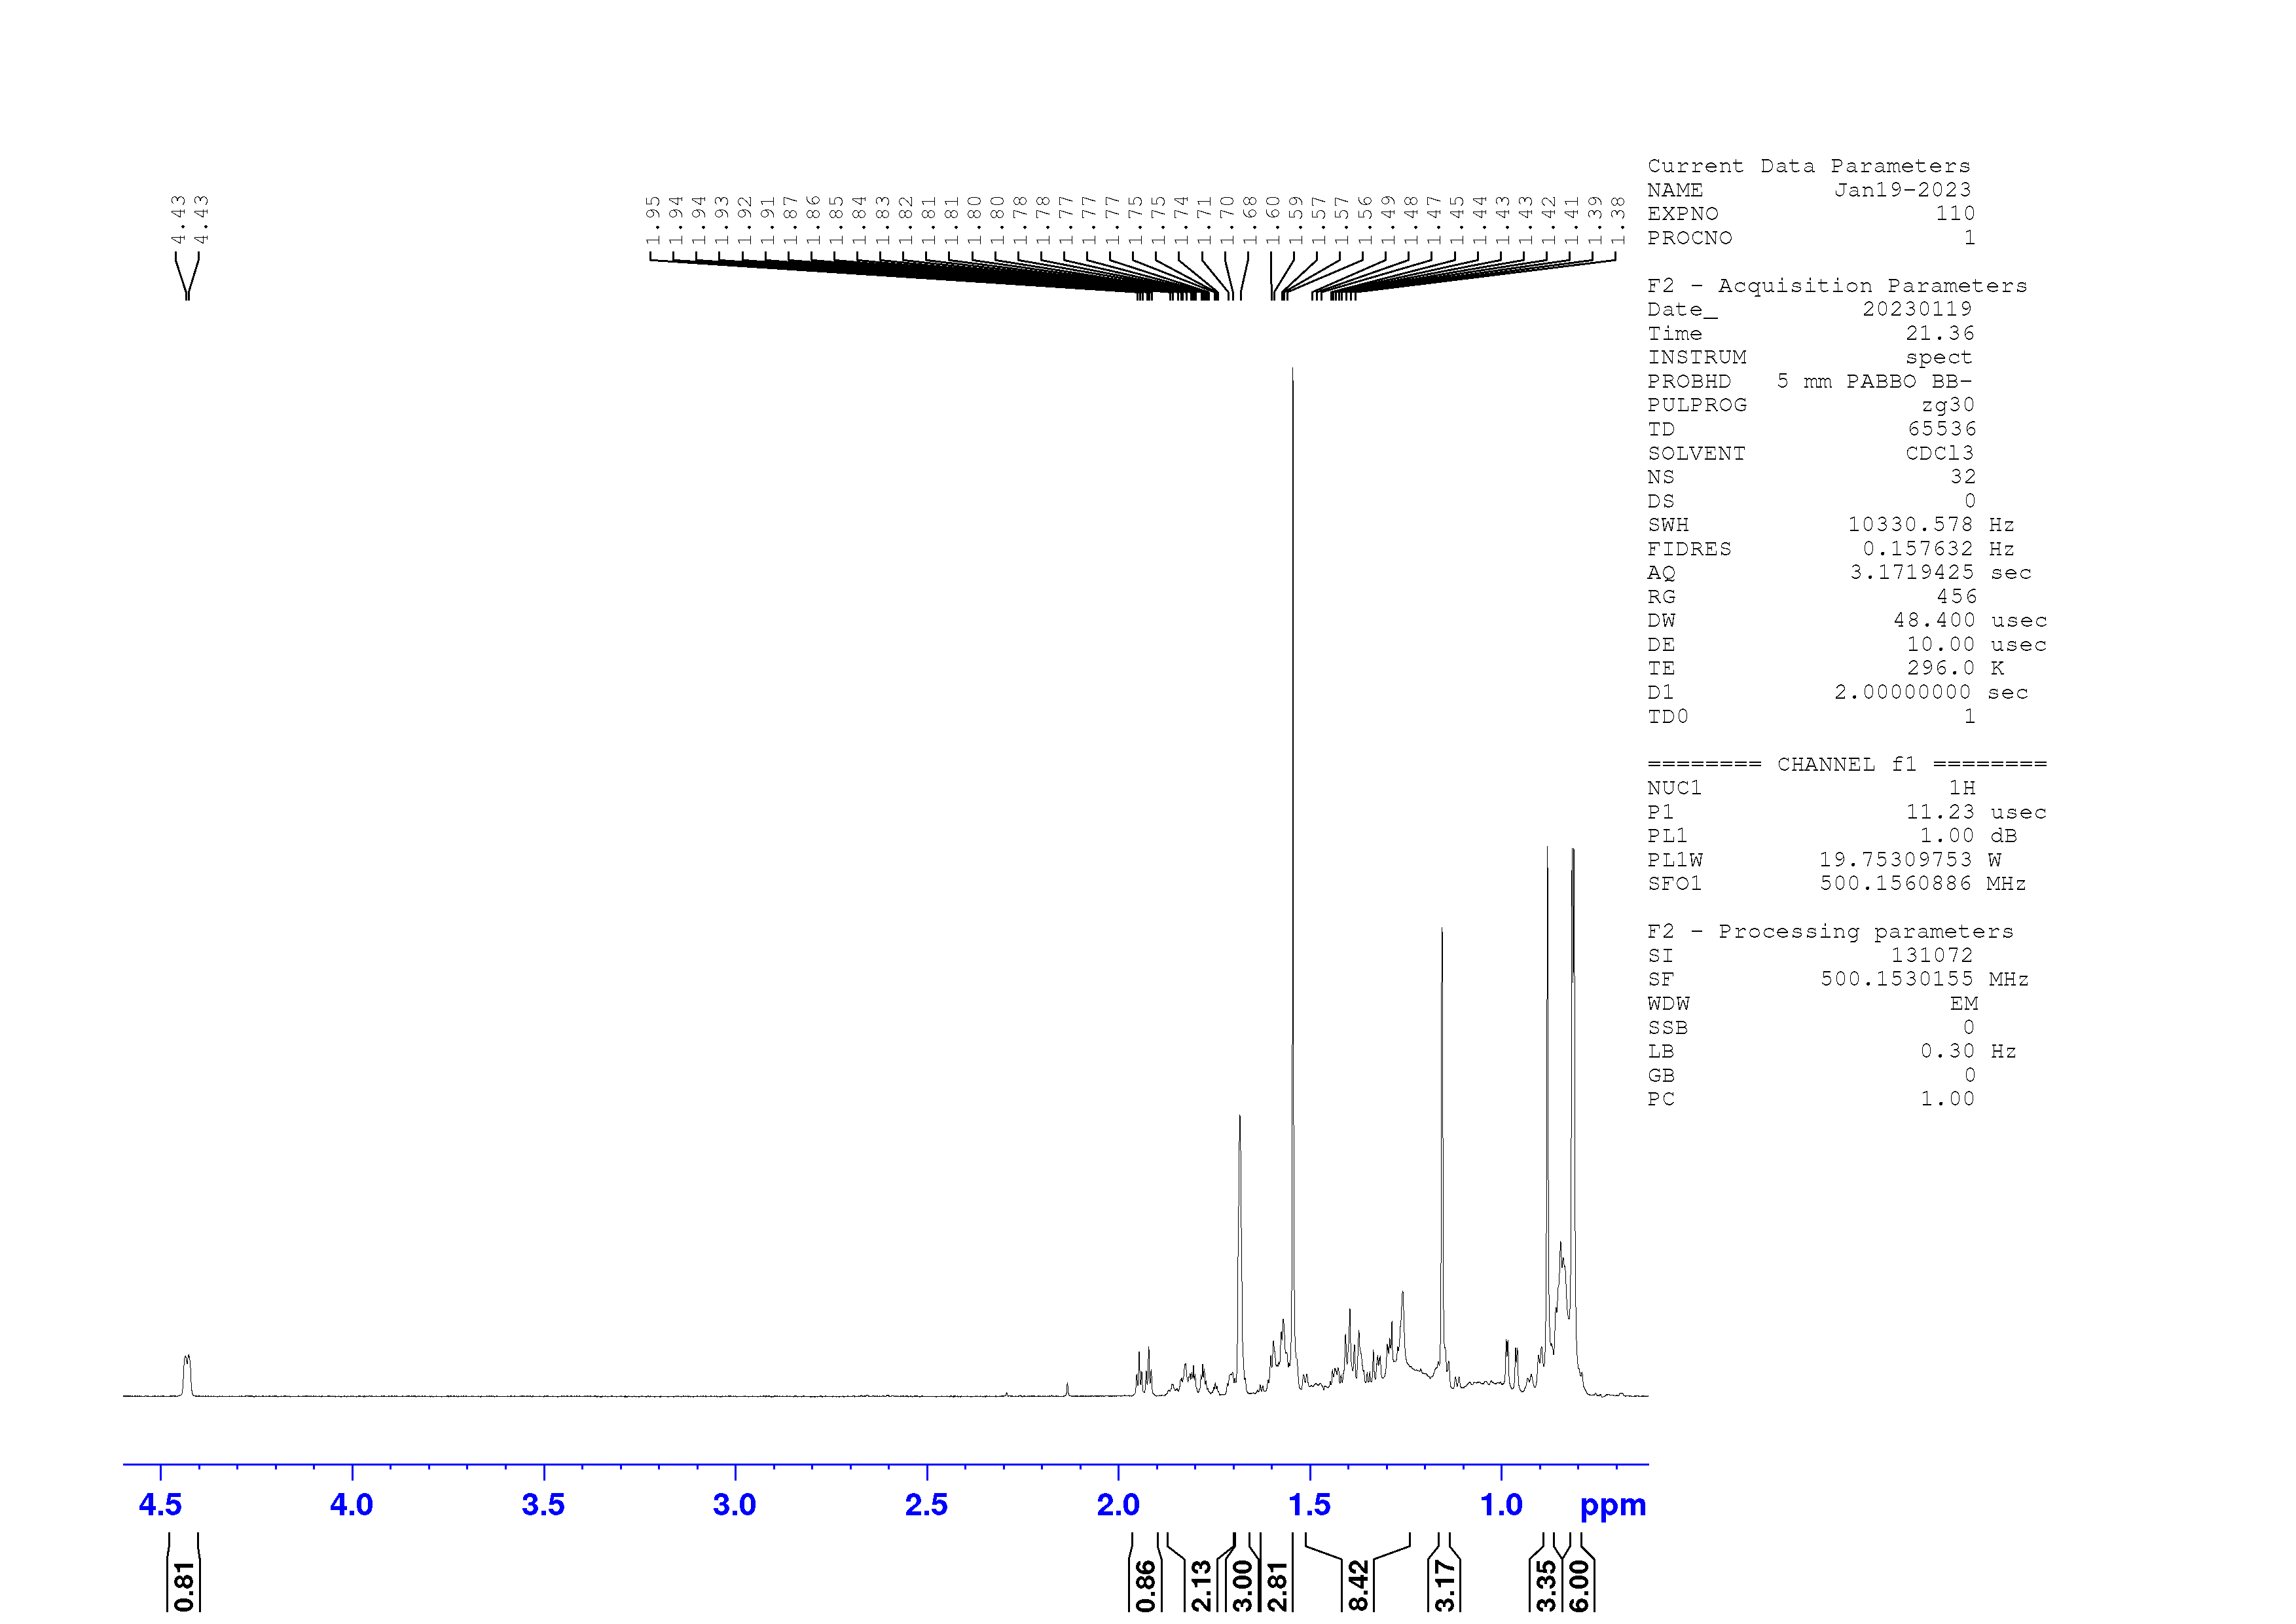


**13C of sclareoloxide (14)**


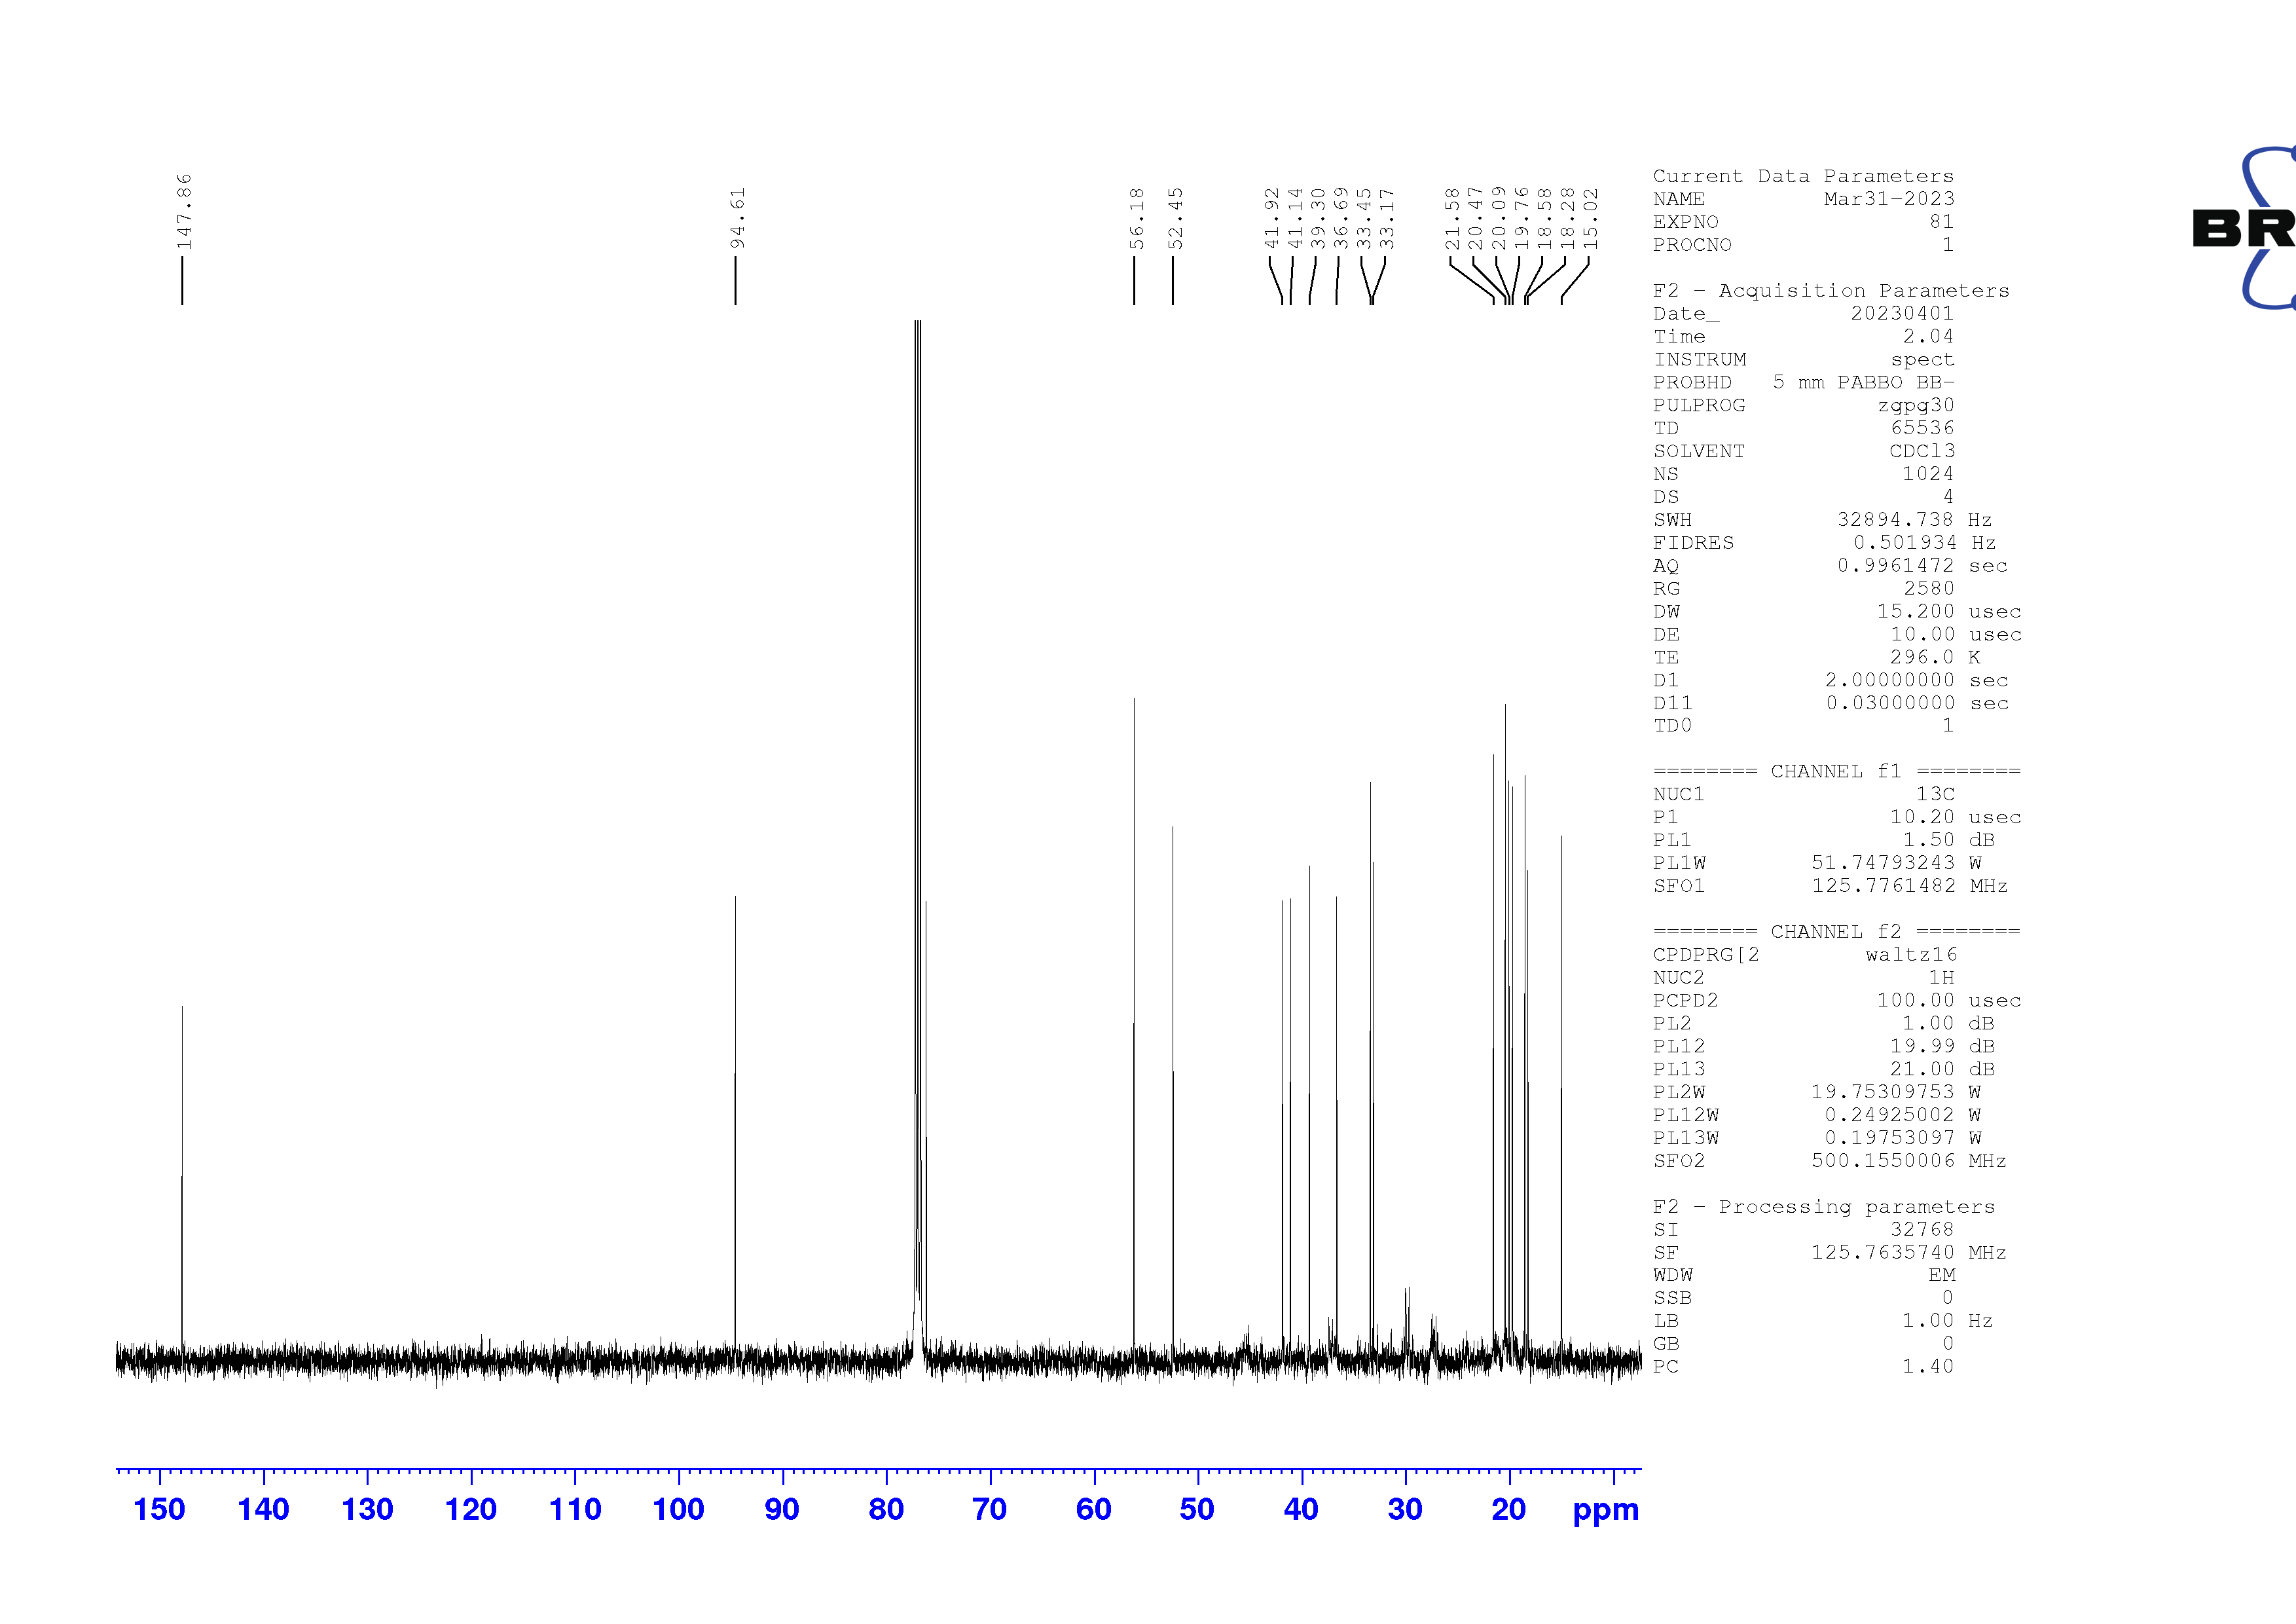


**1H of *S,R,S,S*-drimendiol (9)**


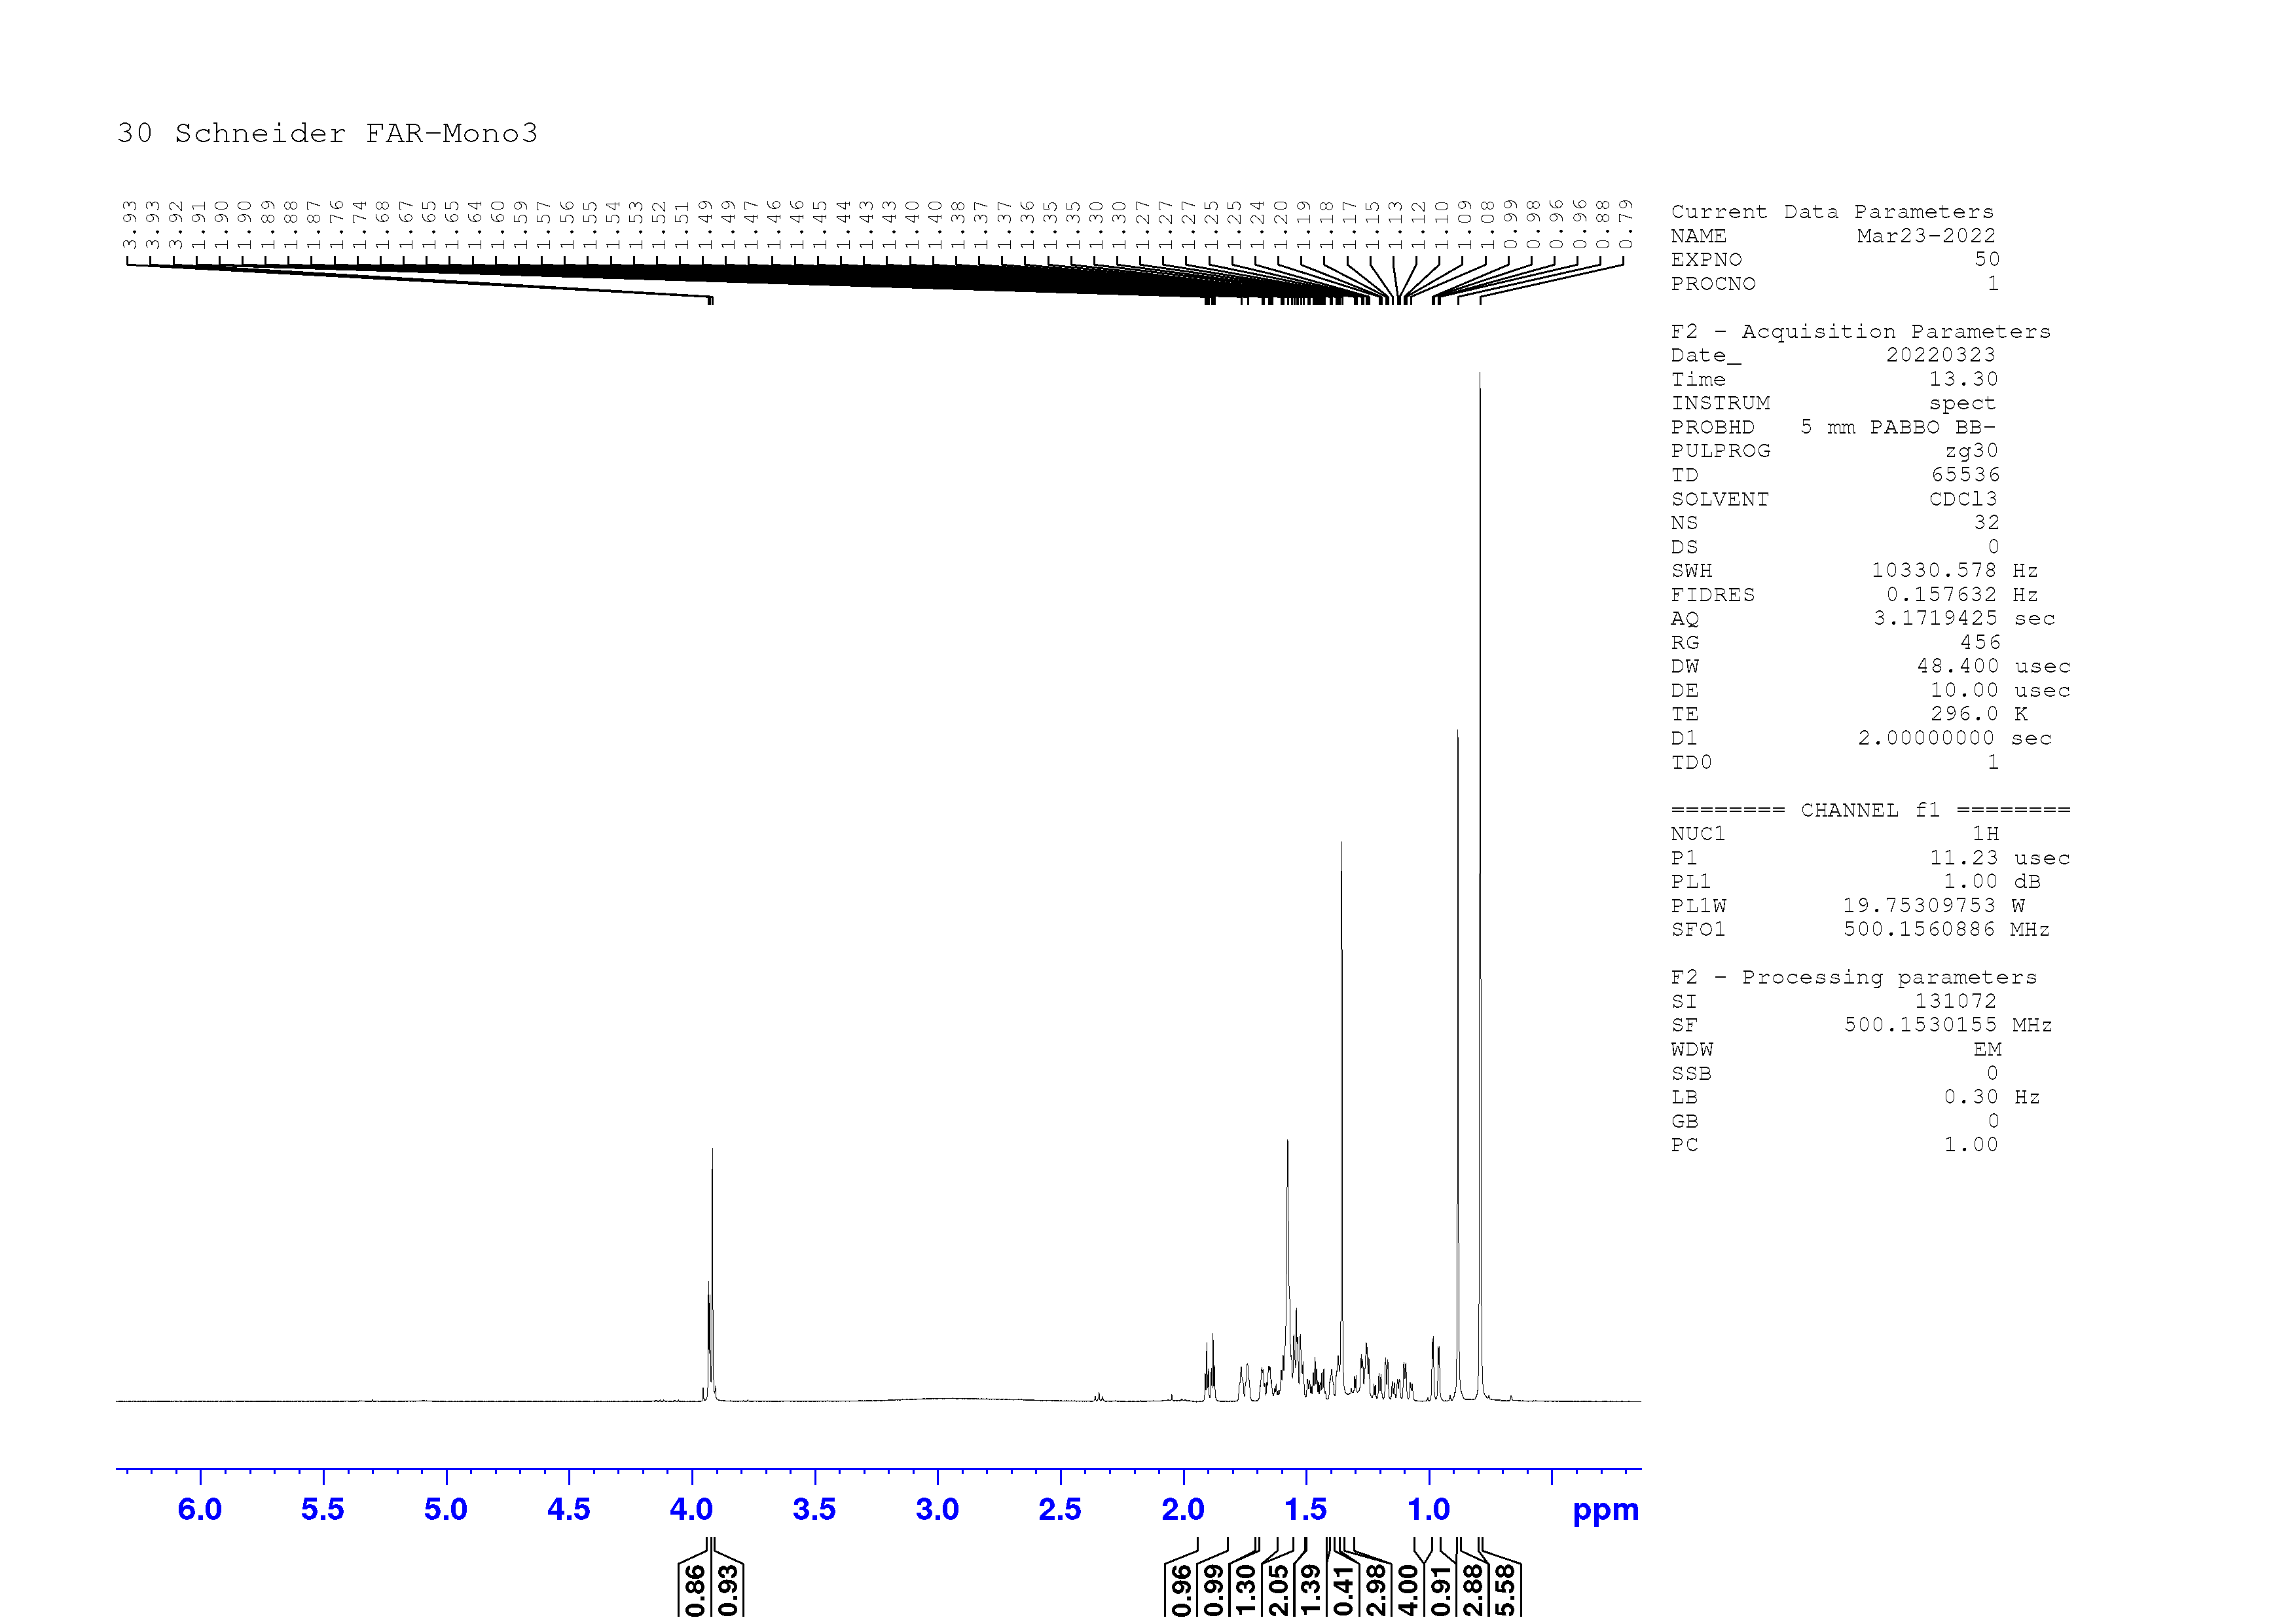


**13C of *S,R,S,S*-drimendiol (9)**


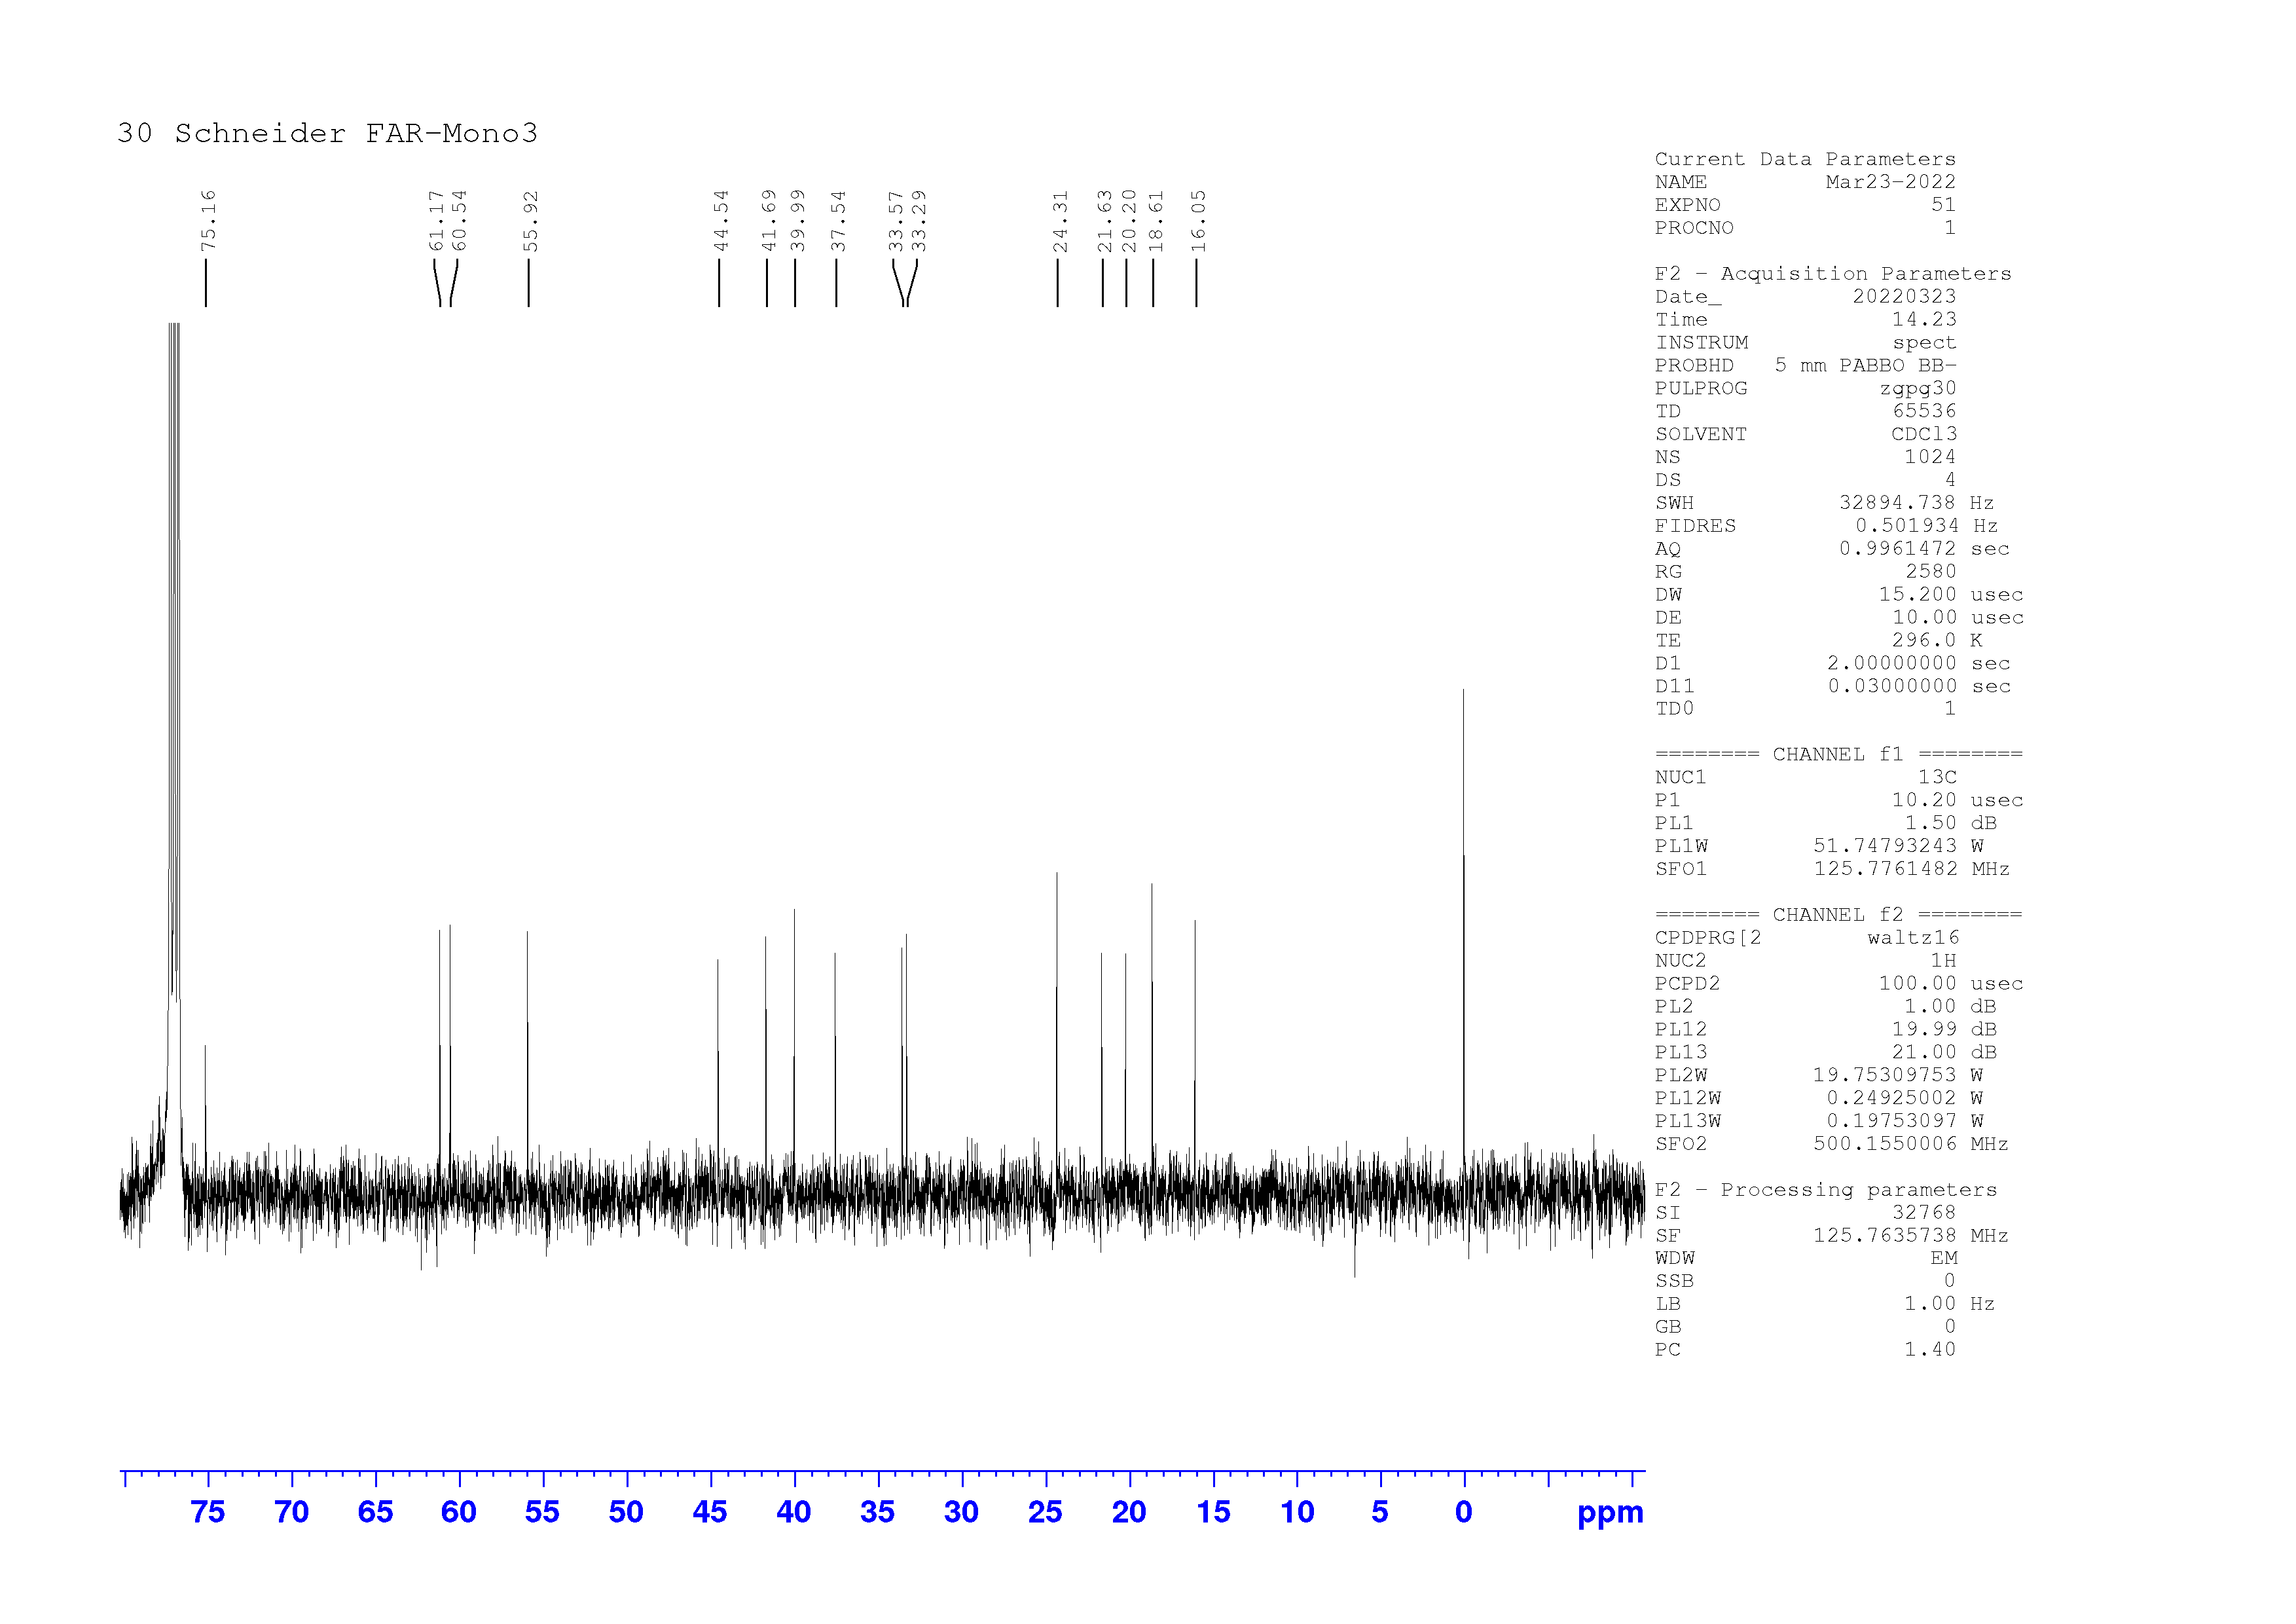


**1H of *S,S,S,S*-drimendiol (S1-9), grease impurity**


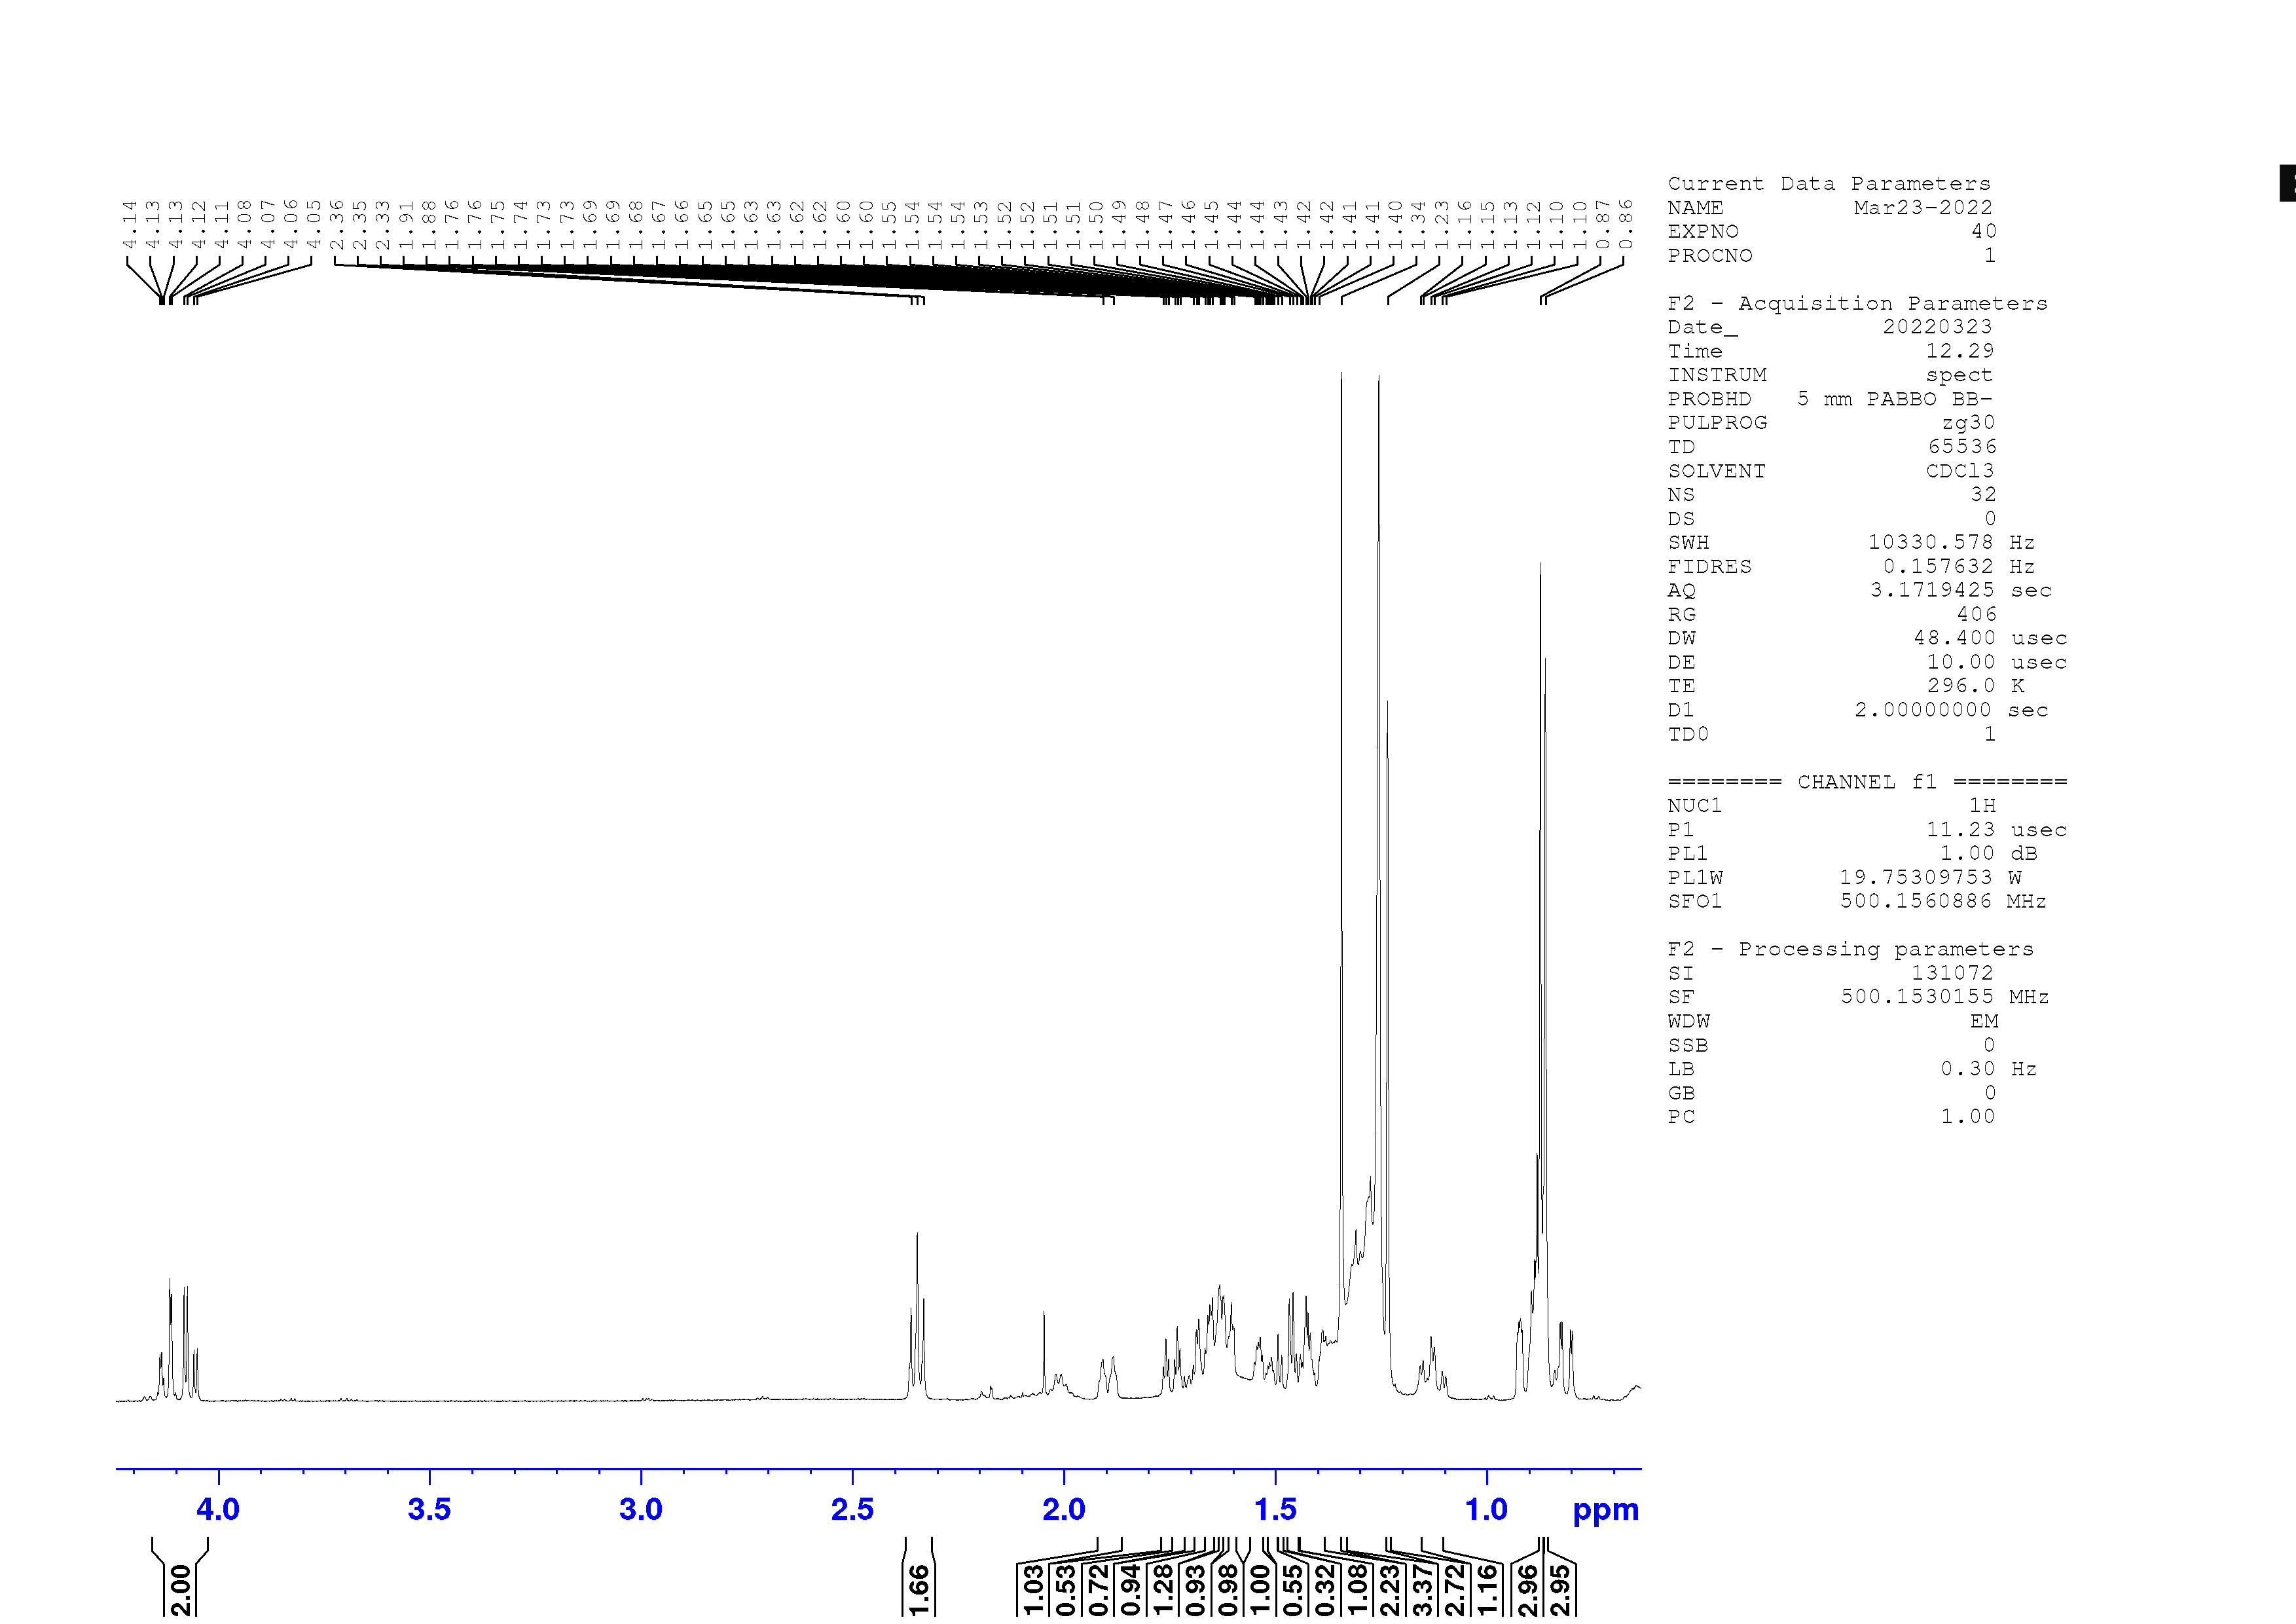


**13C of *S,S,S,S*-drimendiol (S1-9), grease impurity**


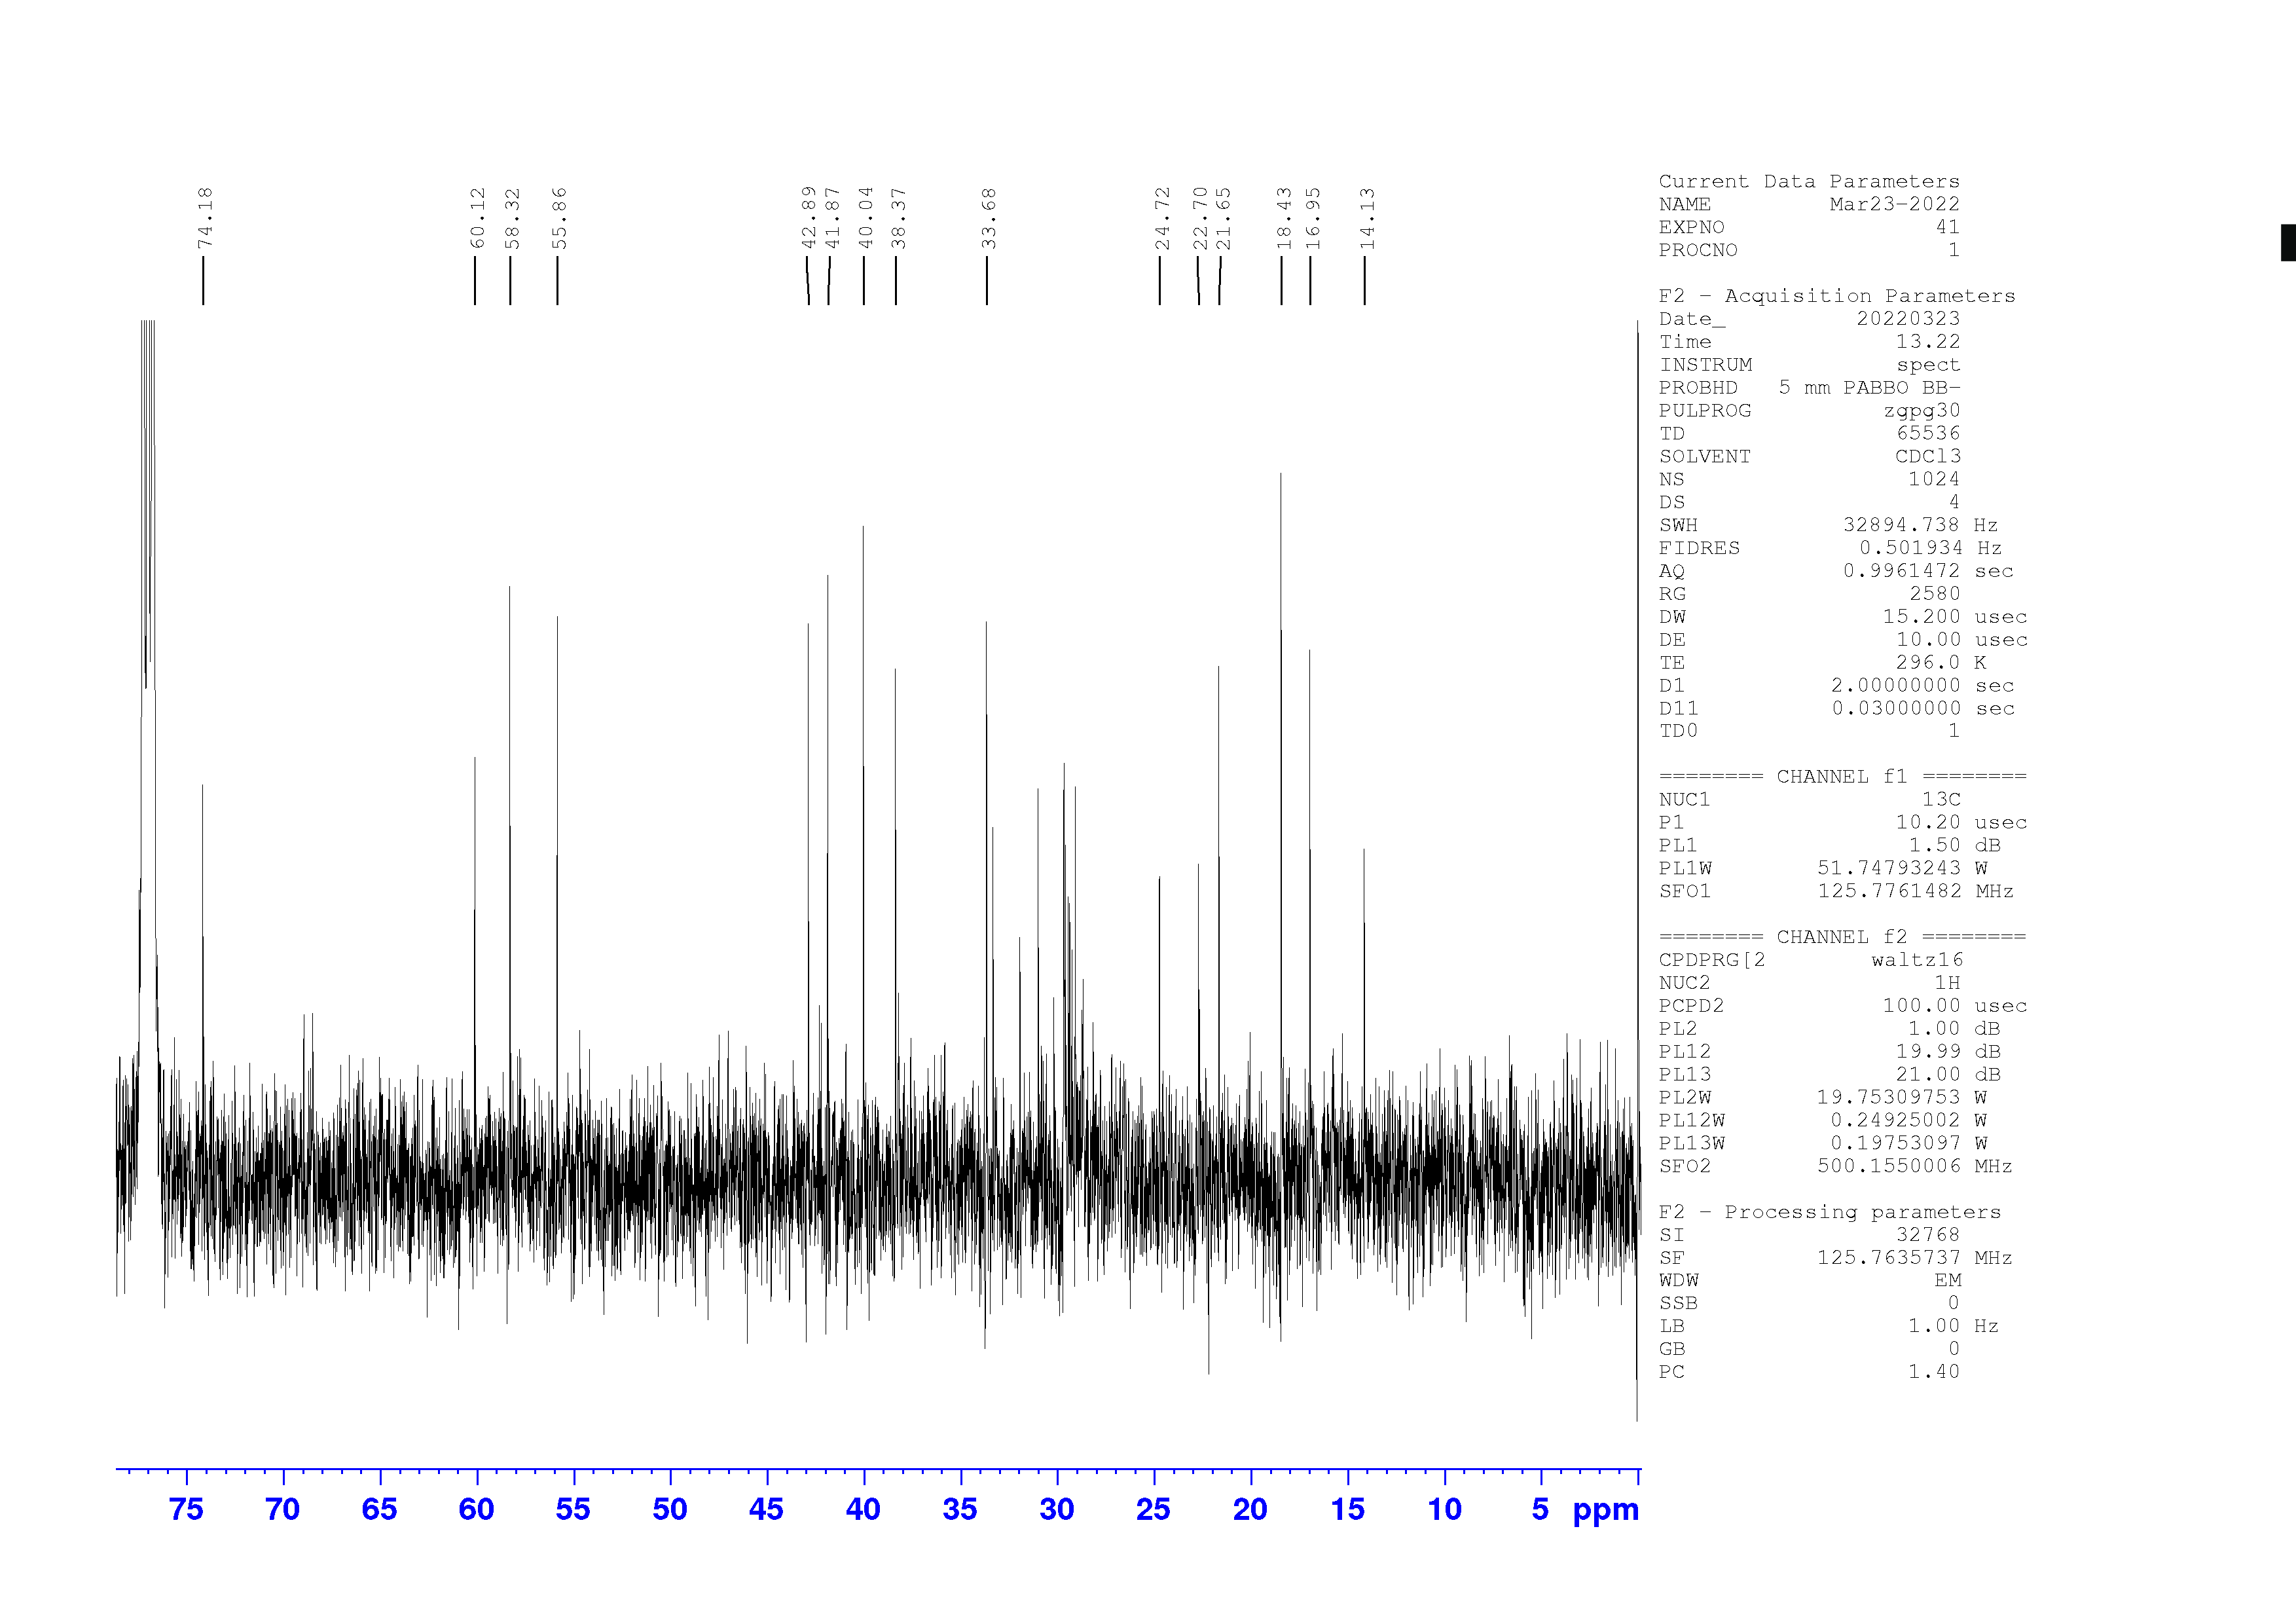


**1H of labdane (12)**


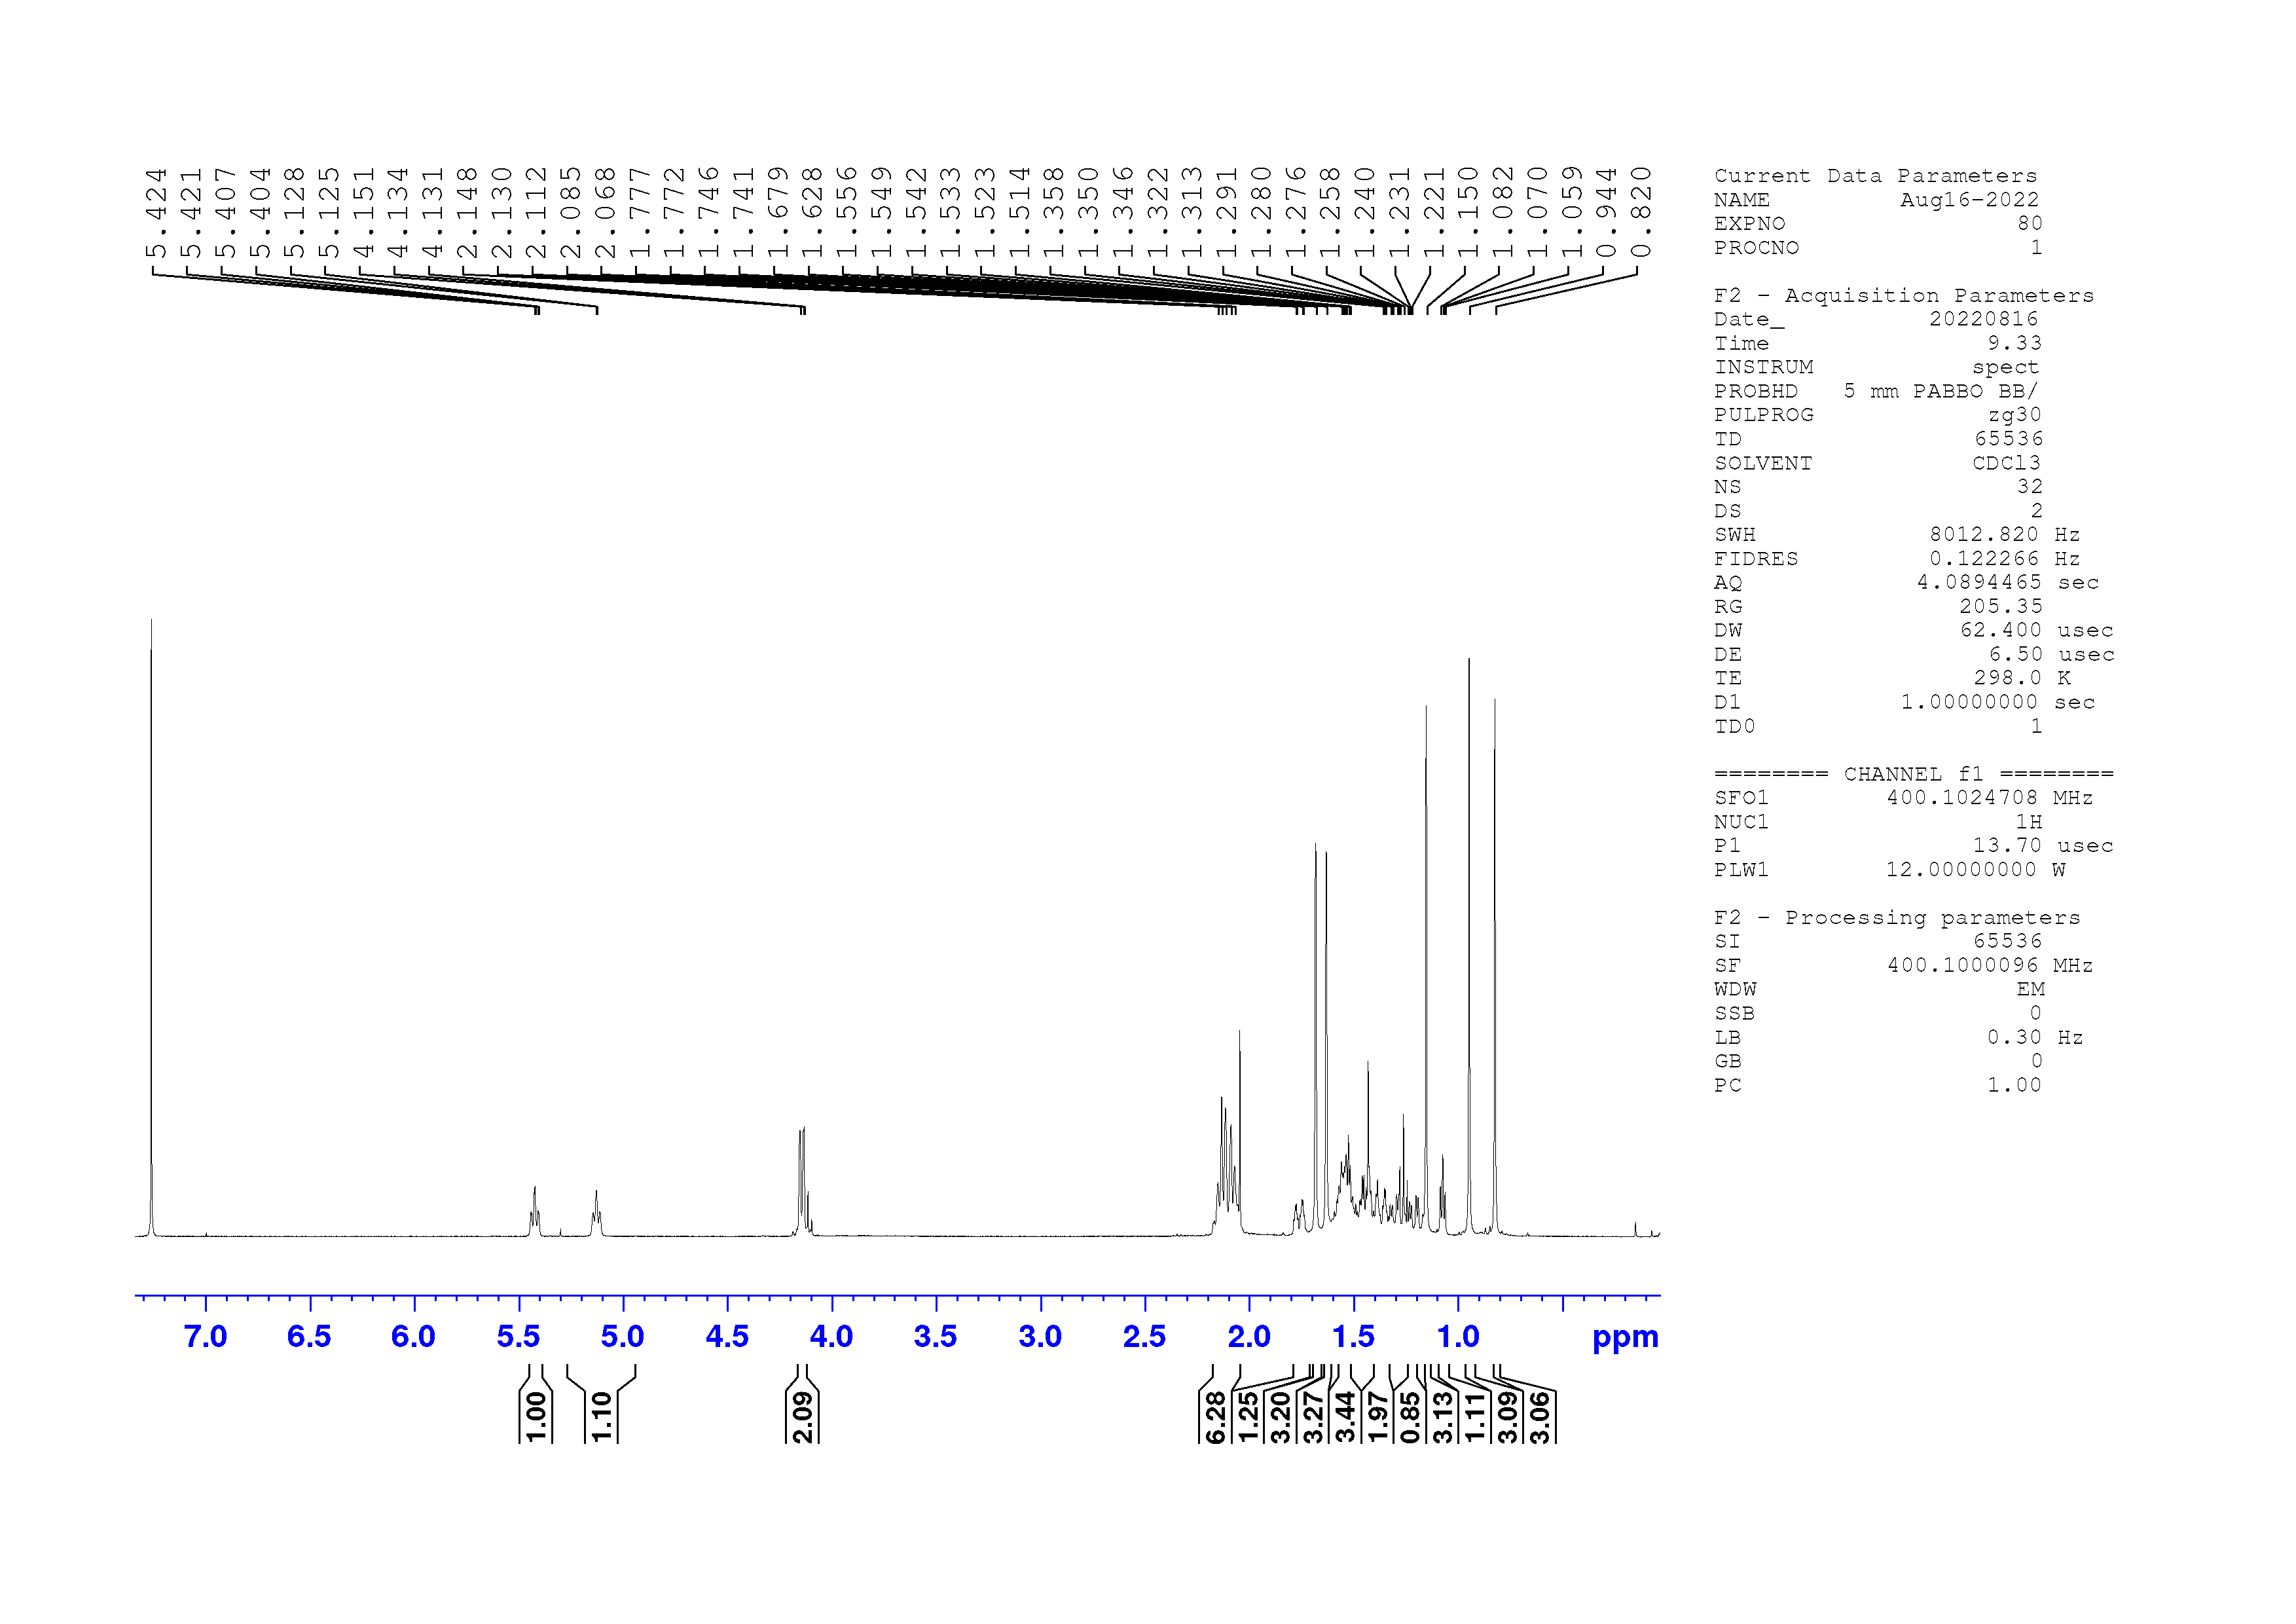


**13C of labdane (12)**


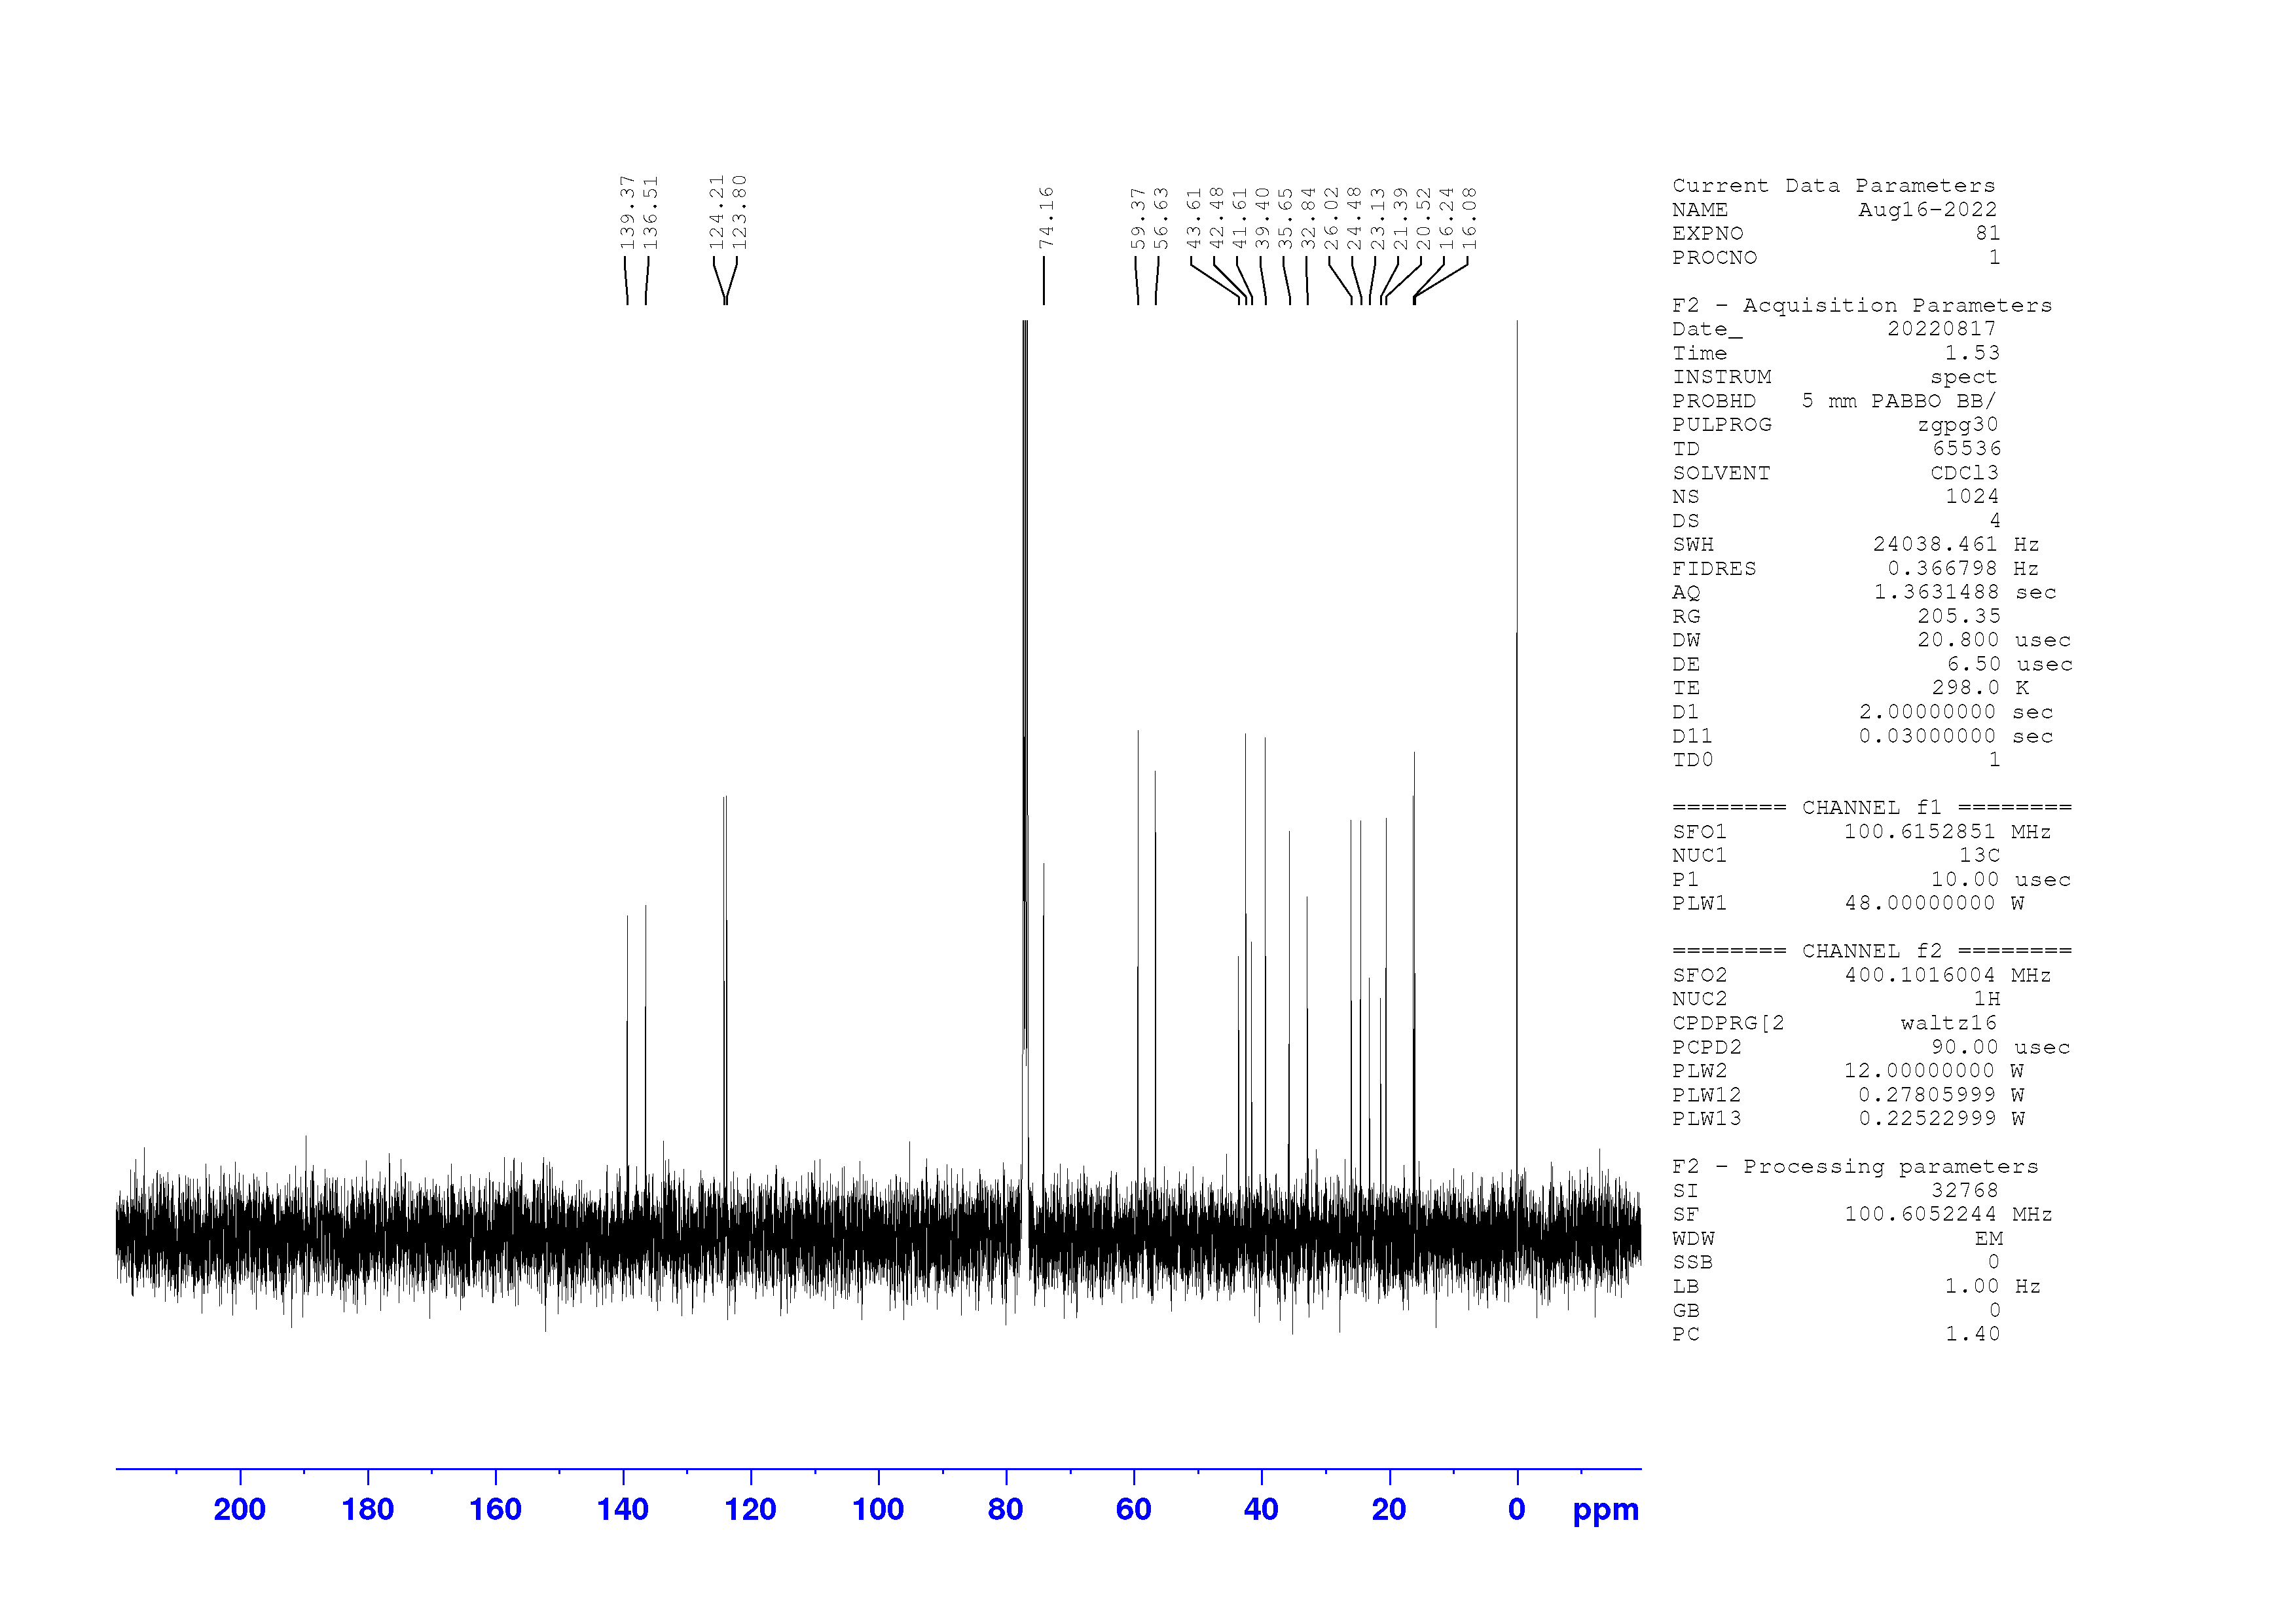


**1H of *ent*-isocopolol (11)**


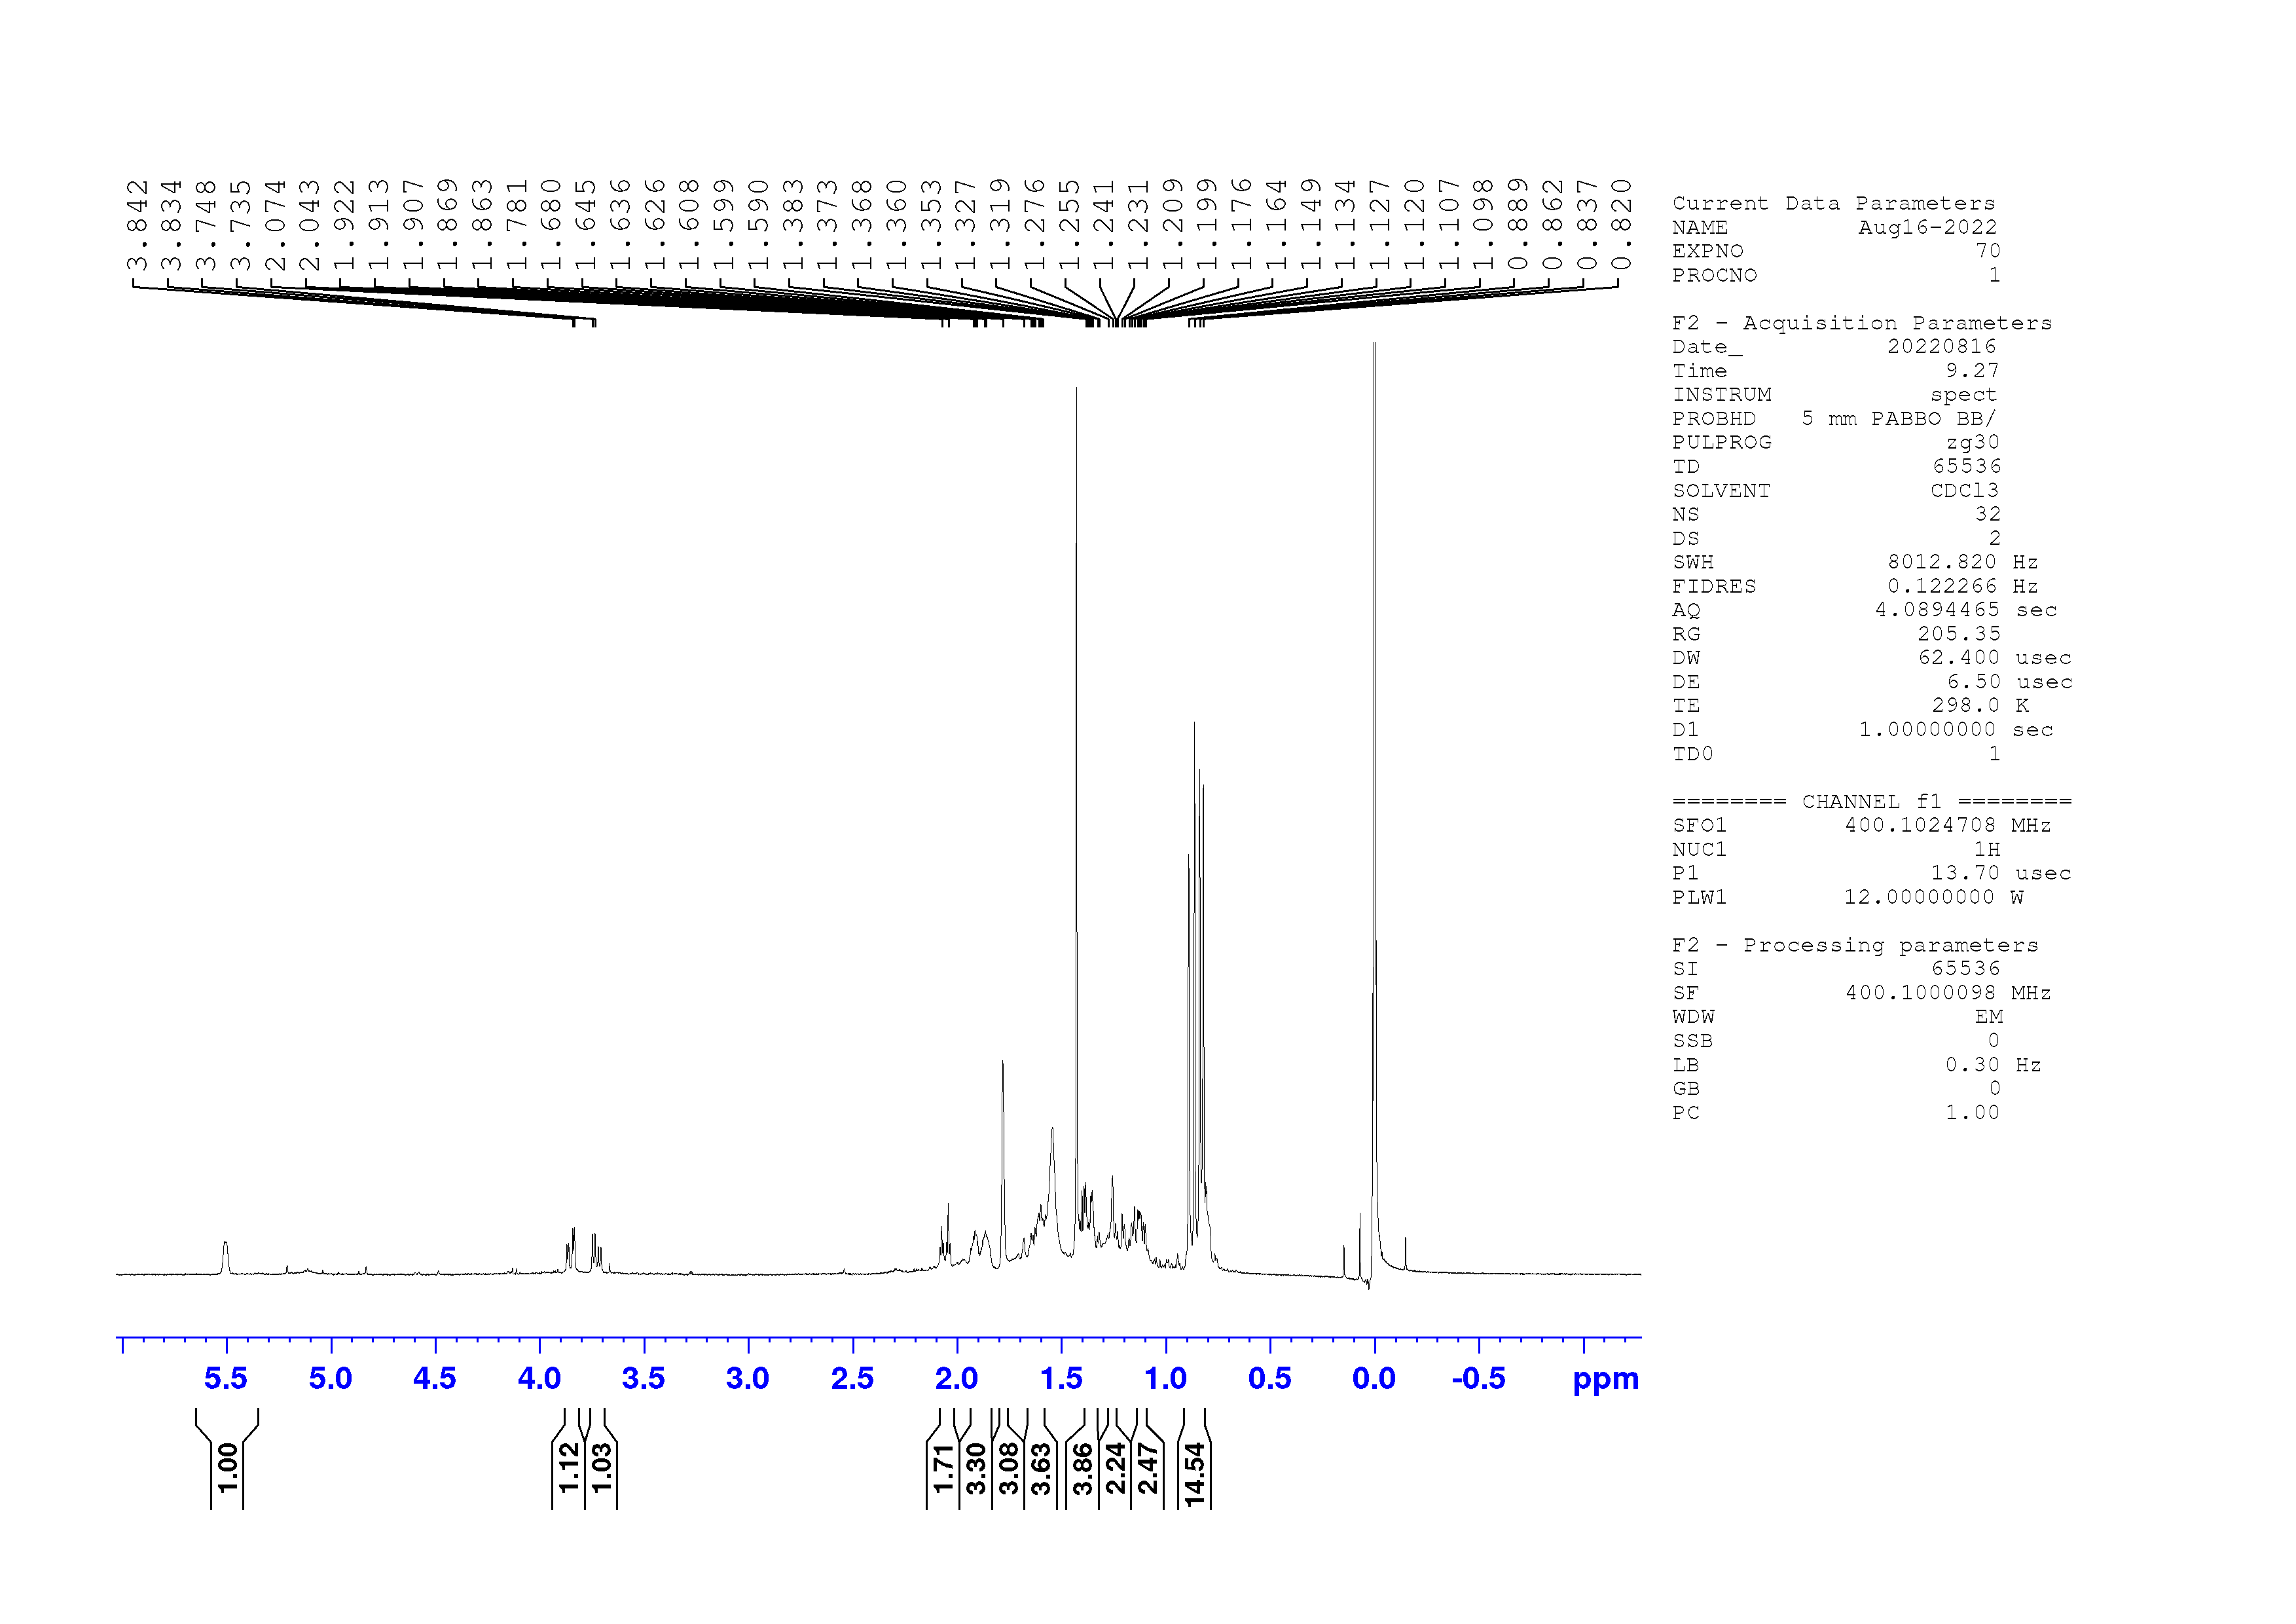


**13C of *ent*-isocopolol (11)**


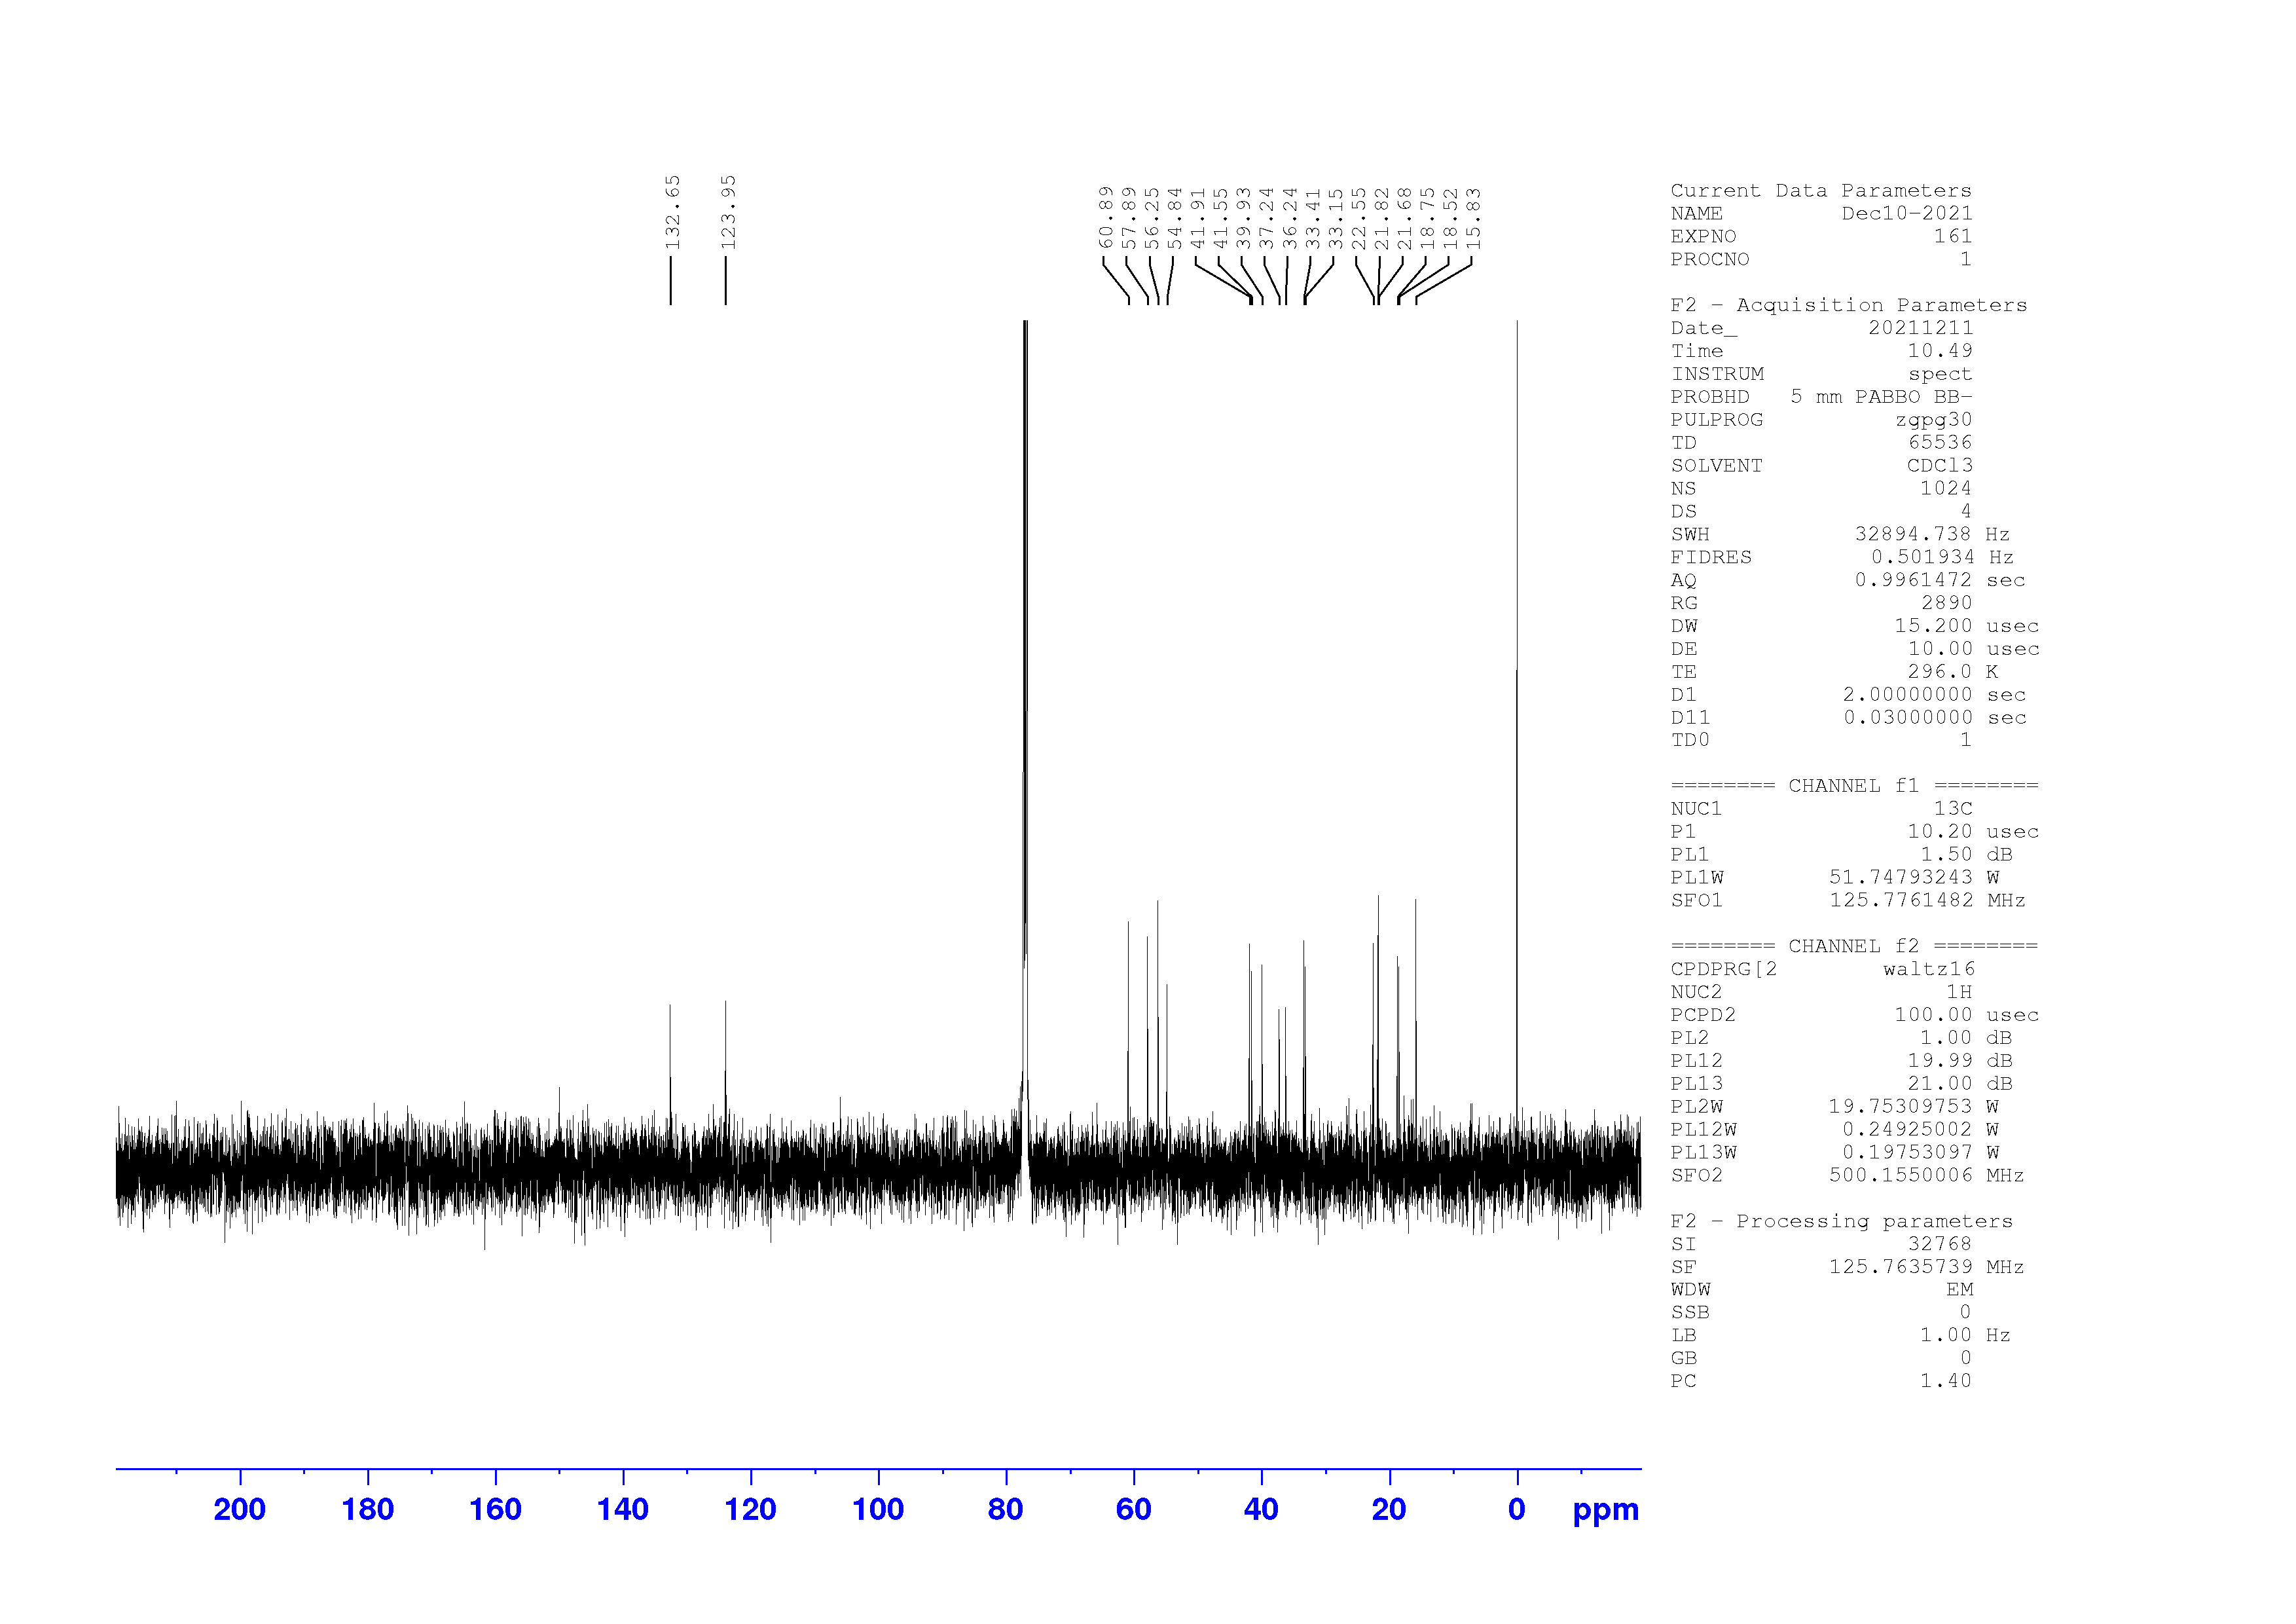


**1H of *ent*-isocopolol mix fraction for side product identification**. Duplett at 4.15-4.16 = 2H next to the hydroxy group of α- and γ-labdane. Singletts at 4.62 and 4.92 = exocyclic double-bond of γ-labdane. Triplett at 5.1 = prenyl-double-bond-H. Triplett at 5.42 endocyclic double-bond-H of α-labdane product.


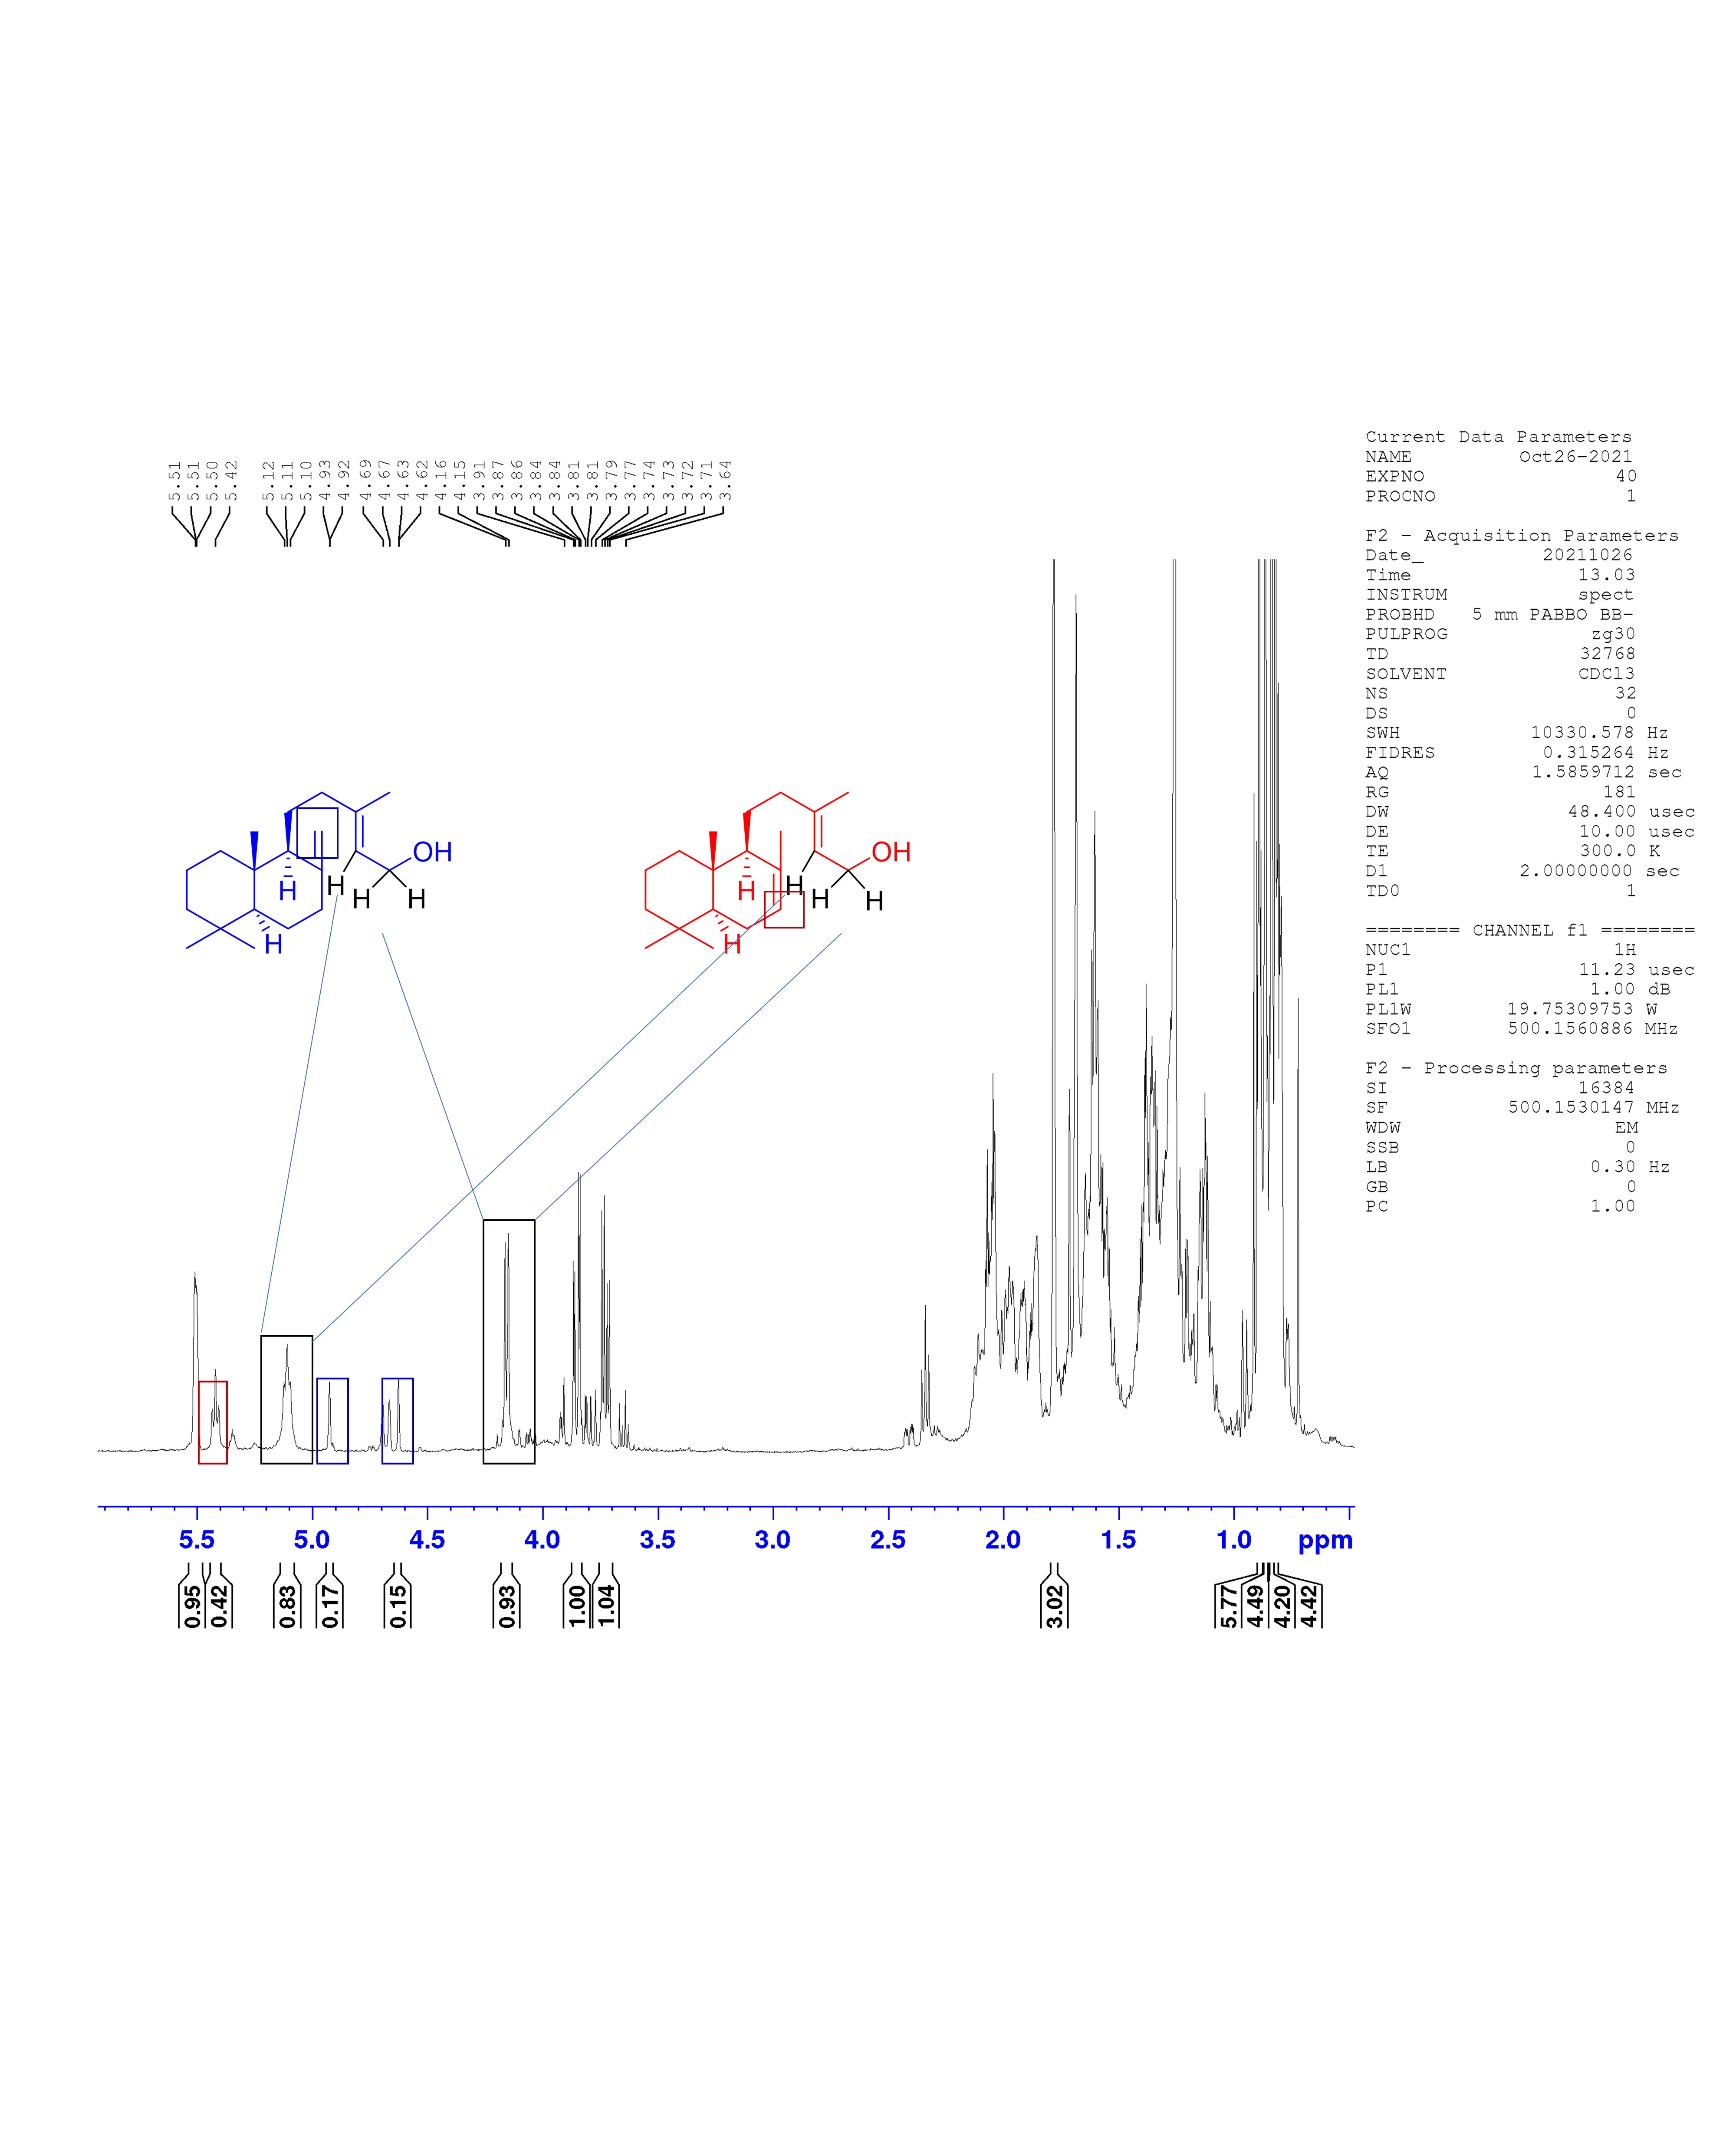


**1H of cyclic β-keto ester (16), cyclohexane impurity**


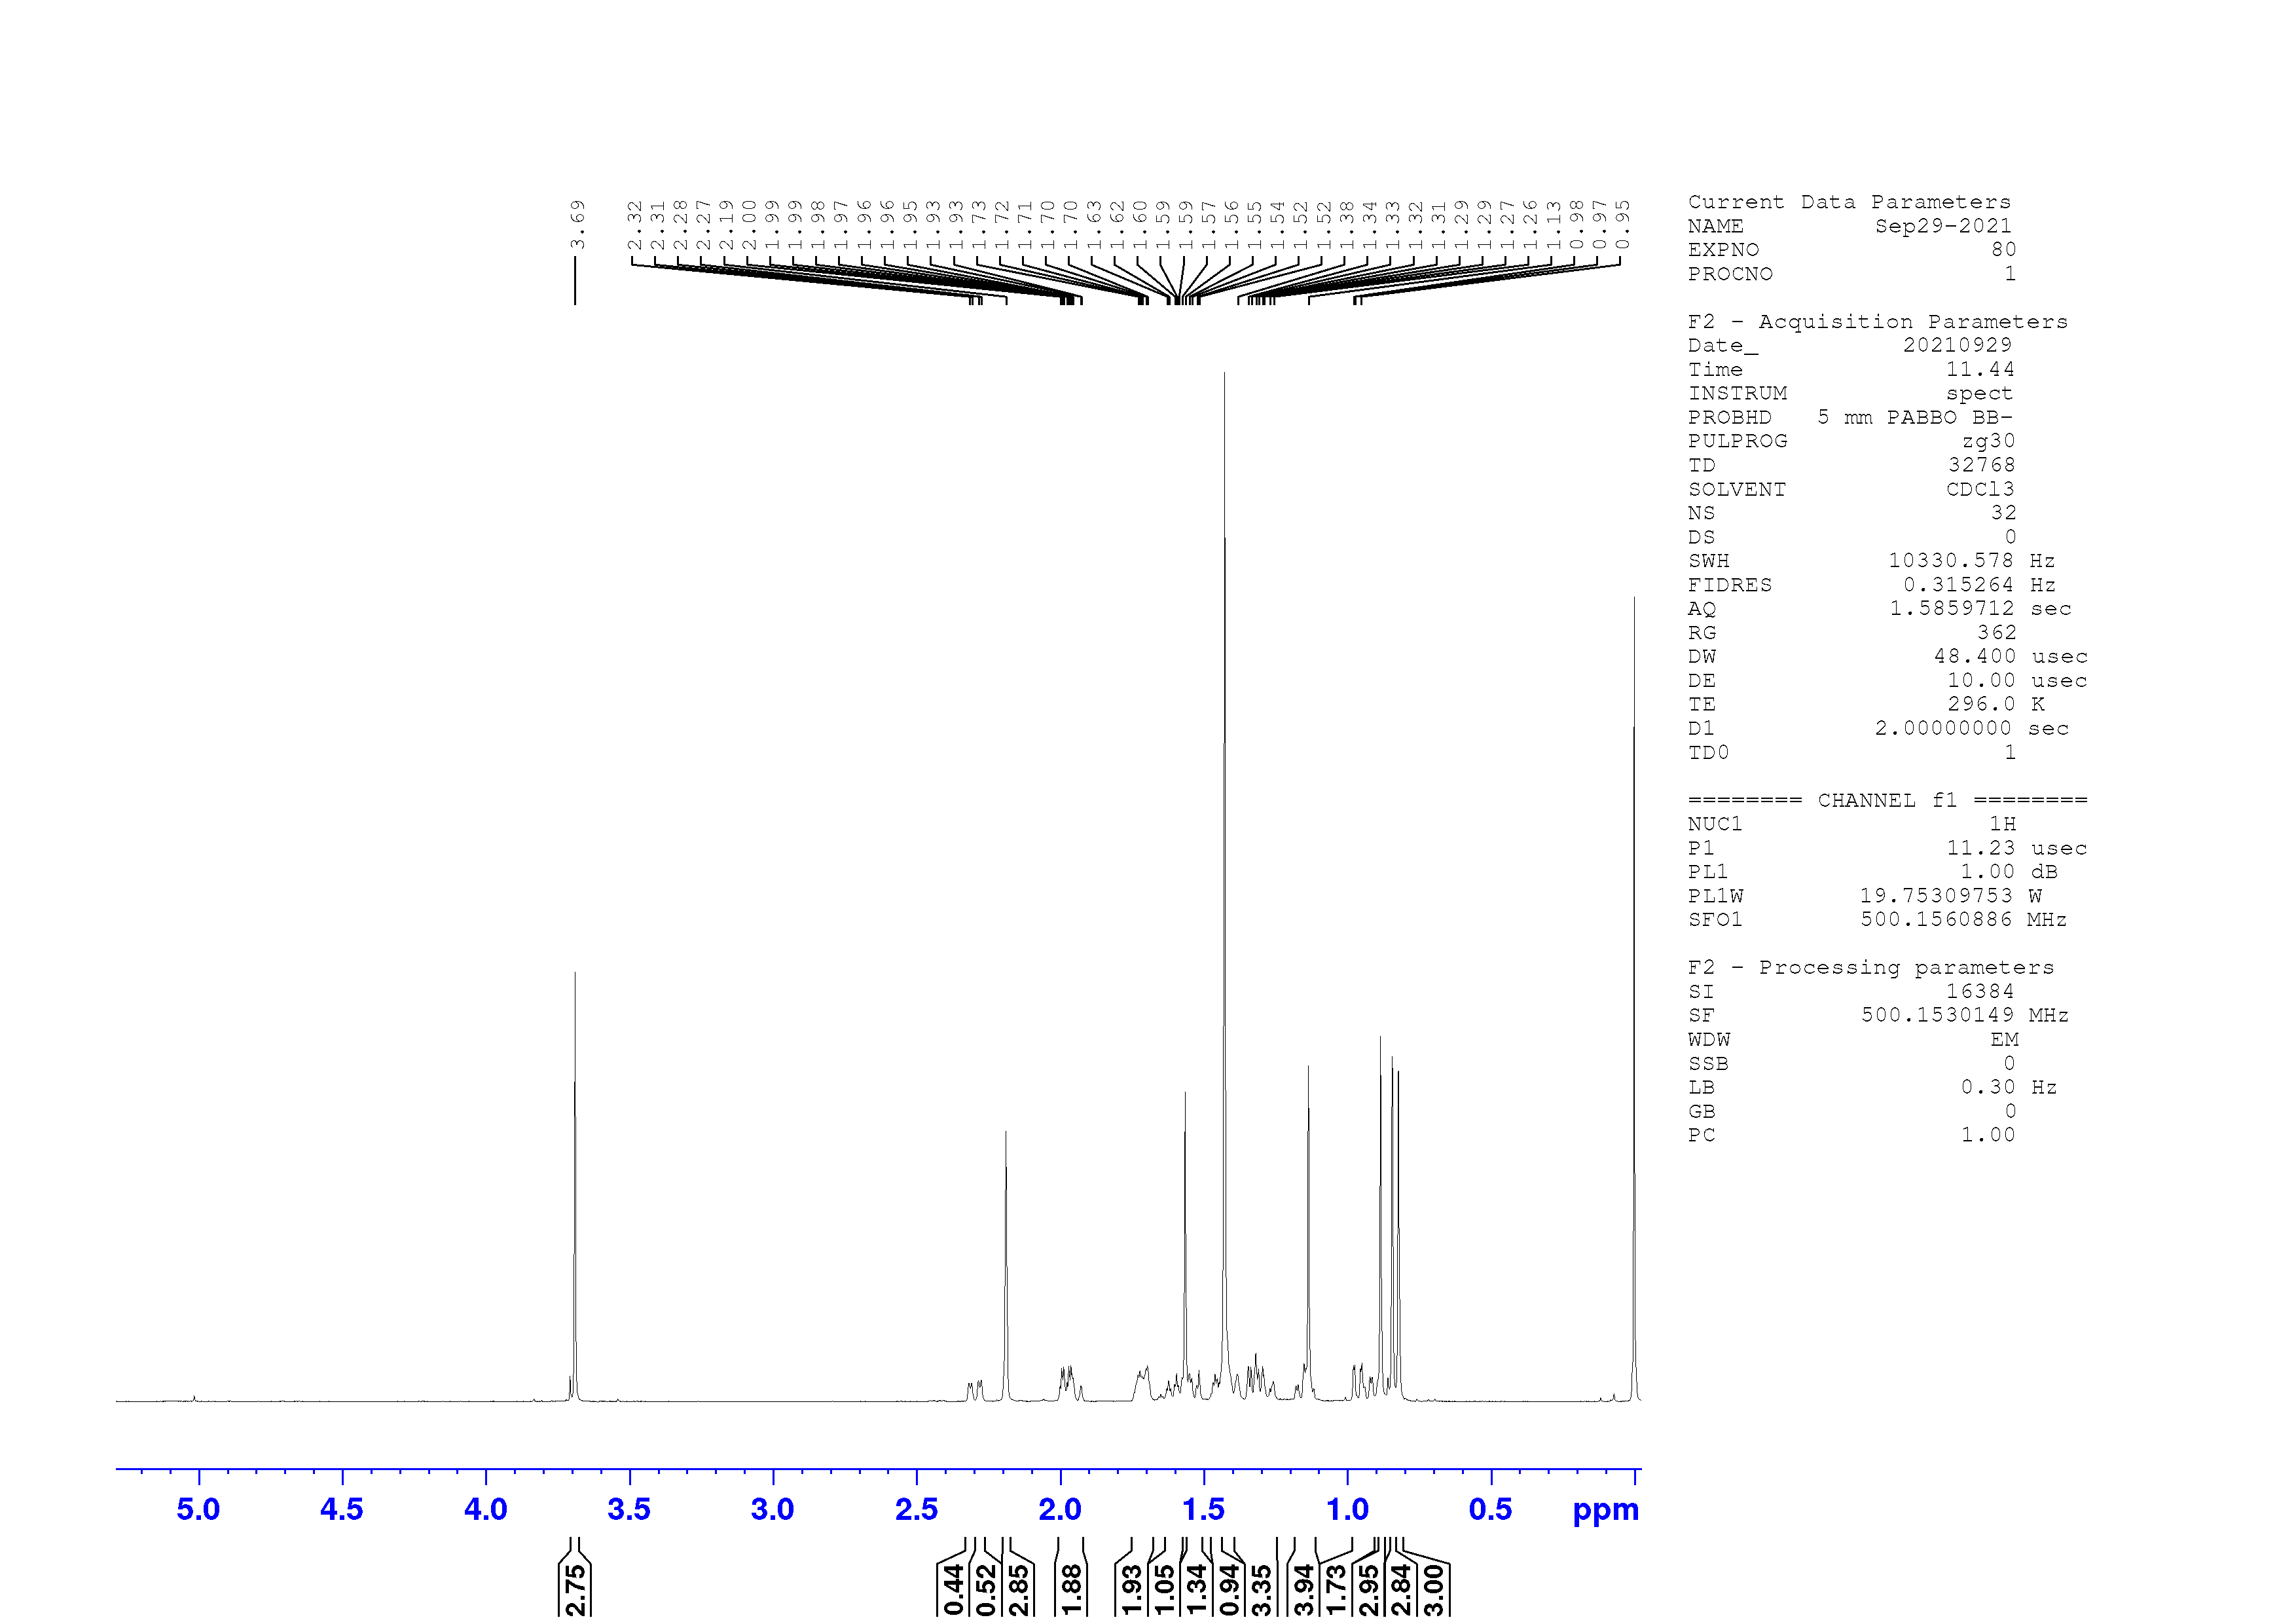


**13X of cyclic β-keto ester (16), cyclohexane impurity**


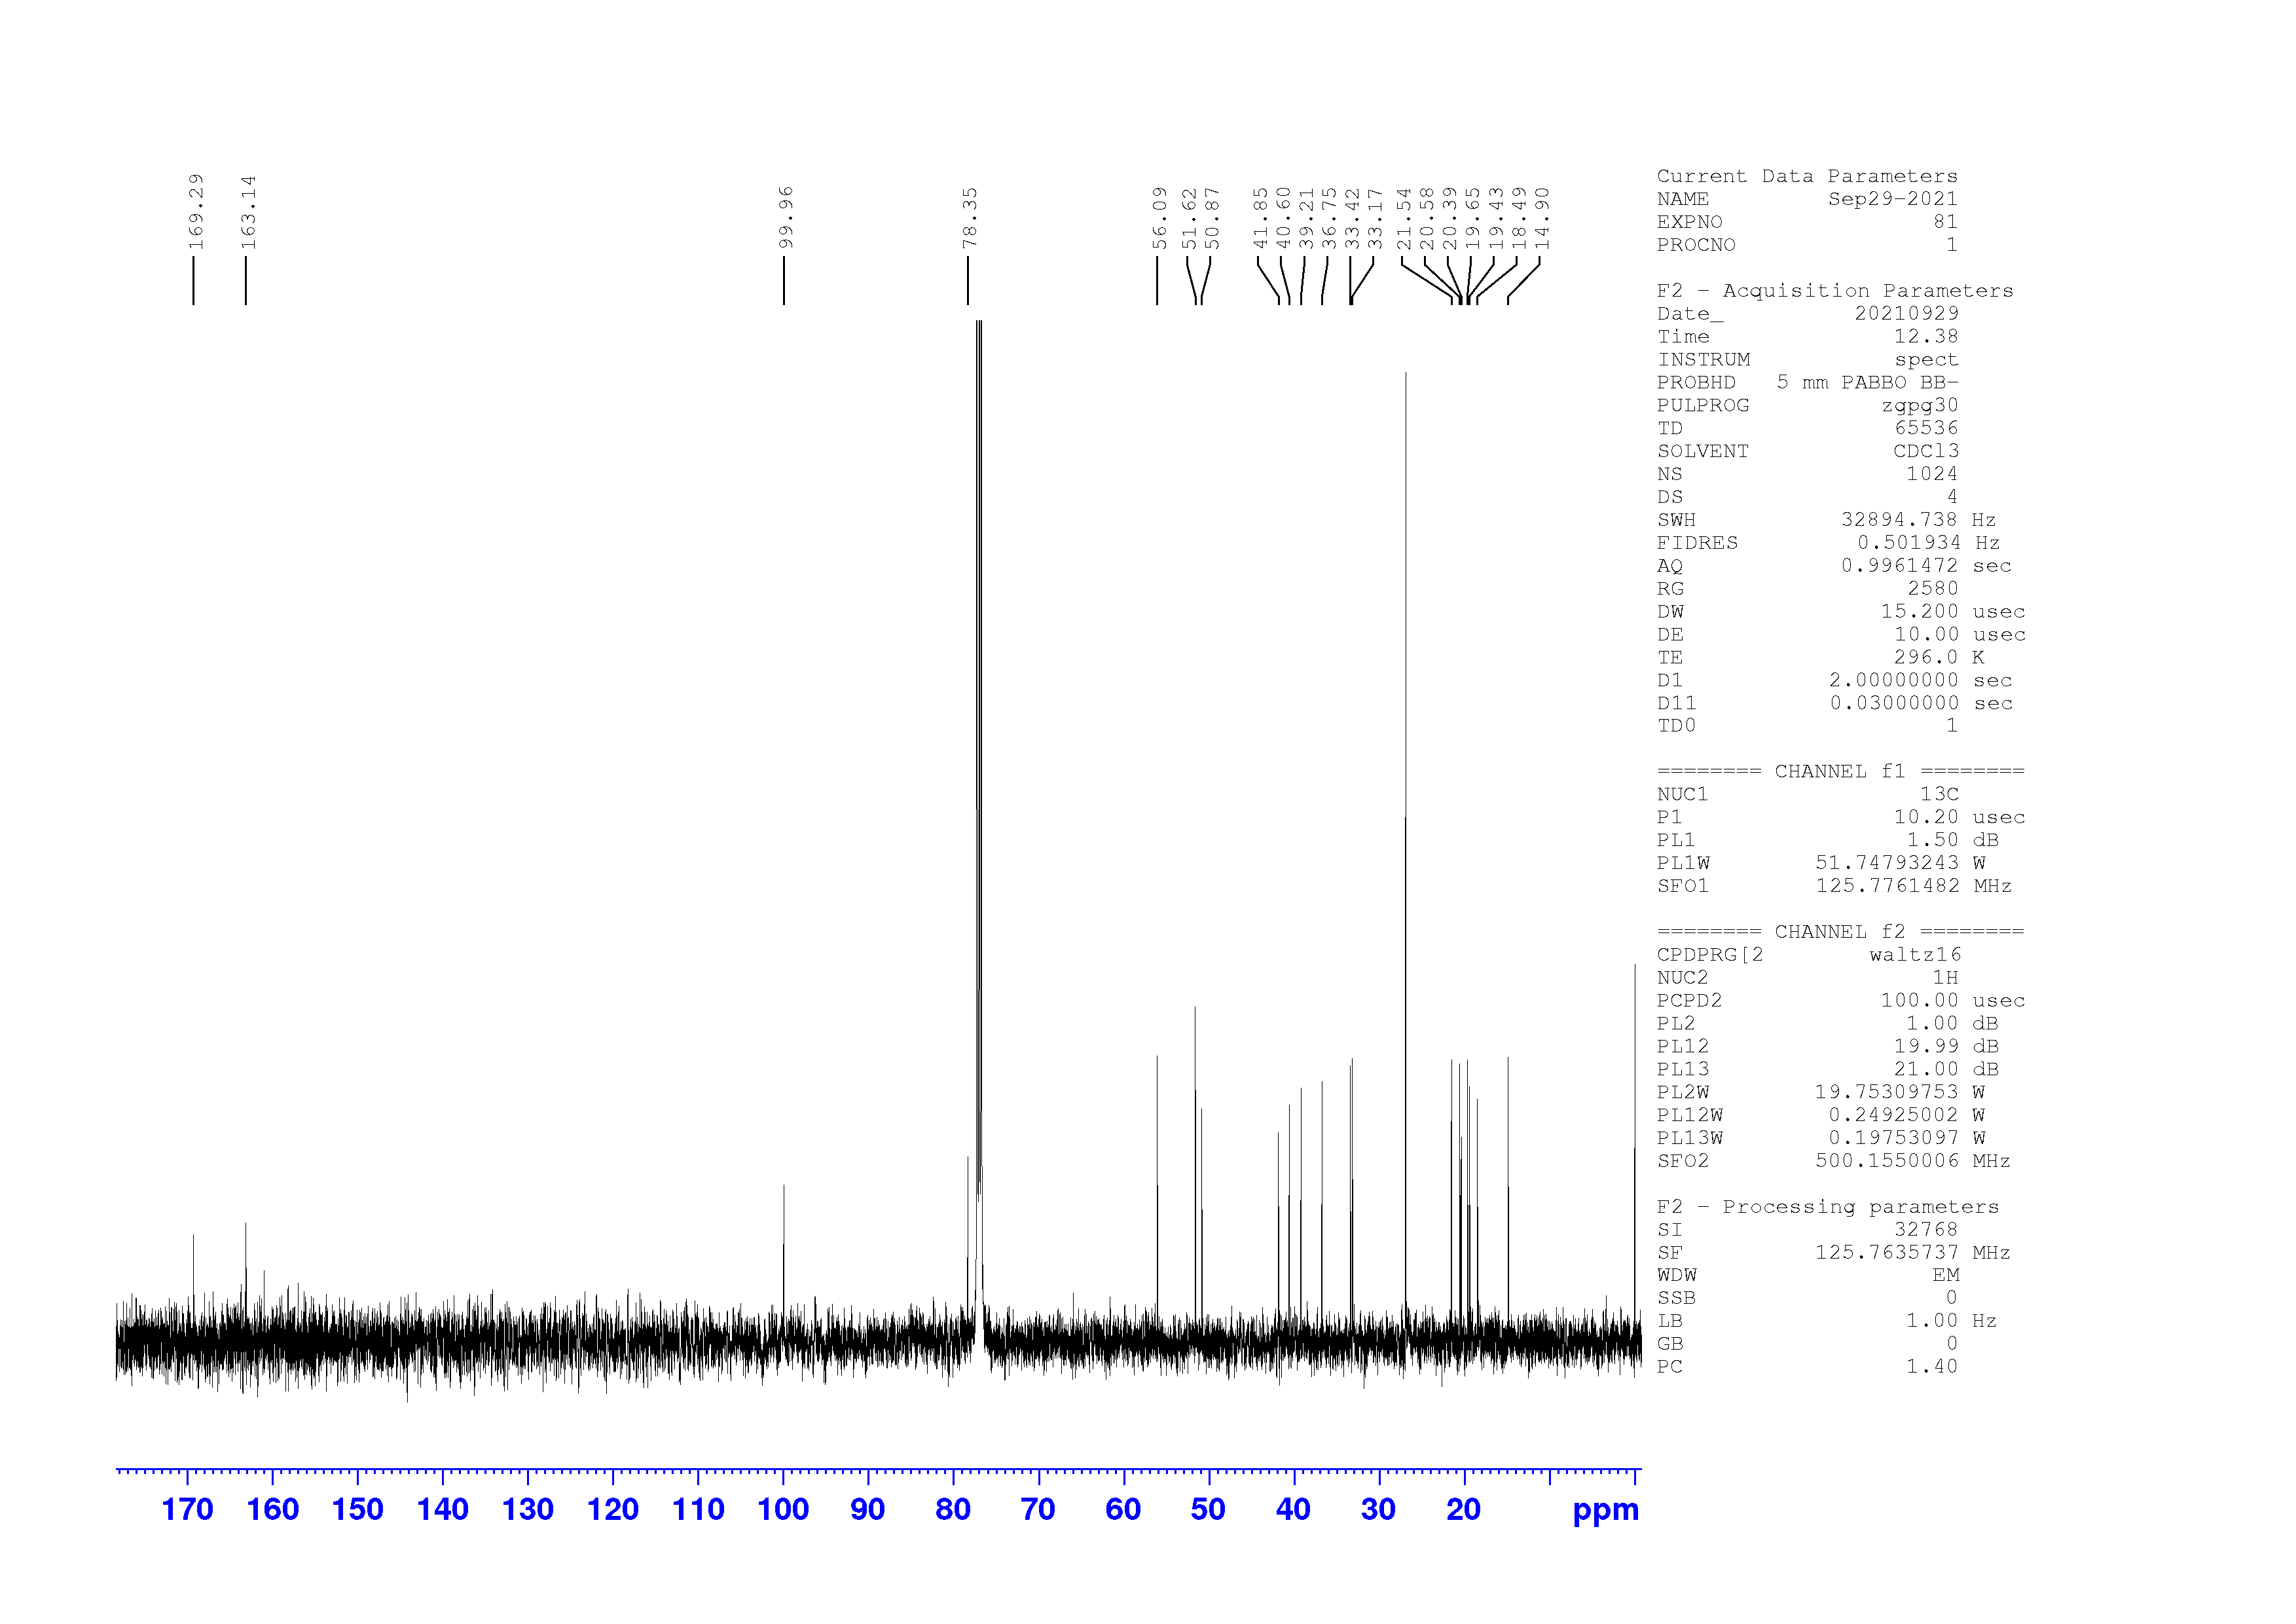


**1H of β-keto ester (15)**


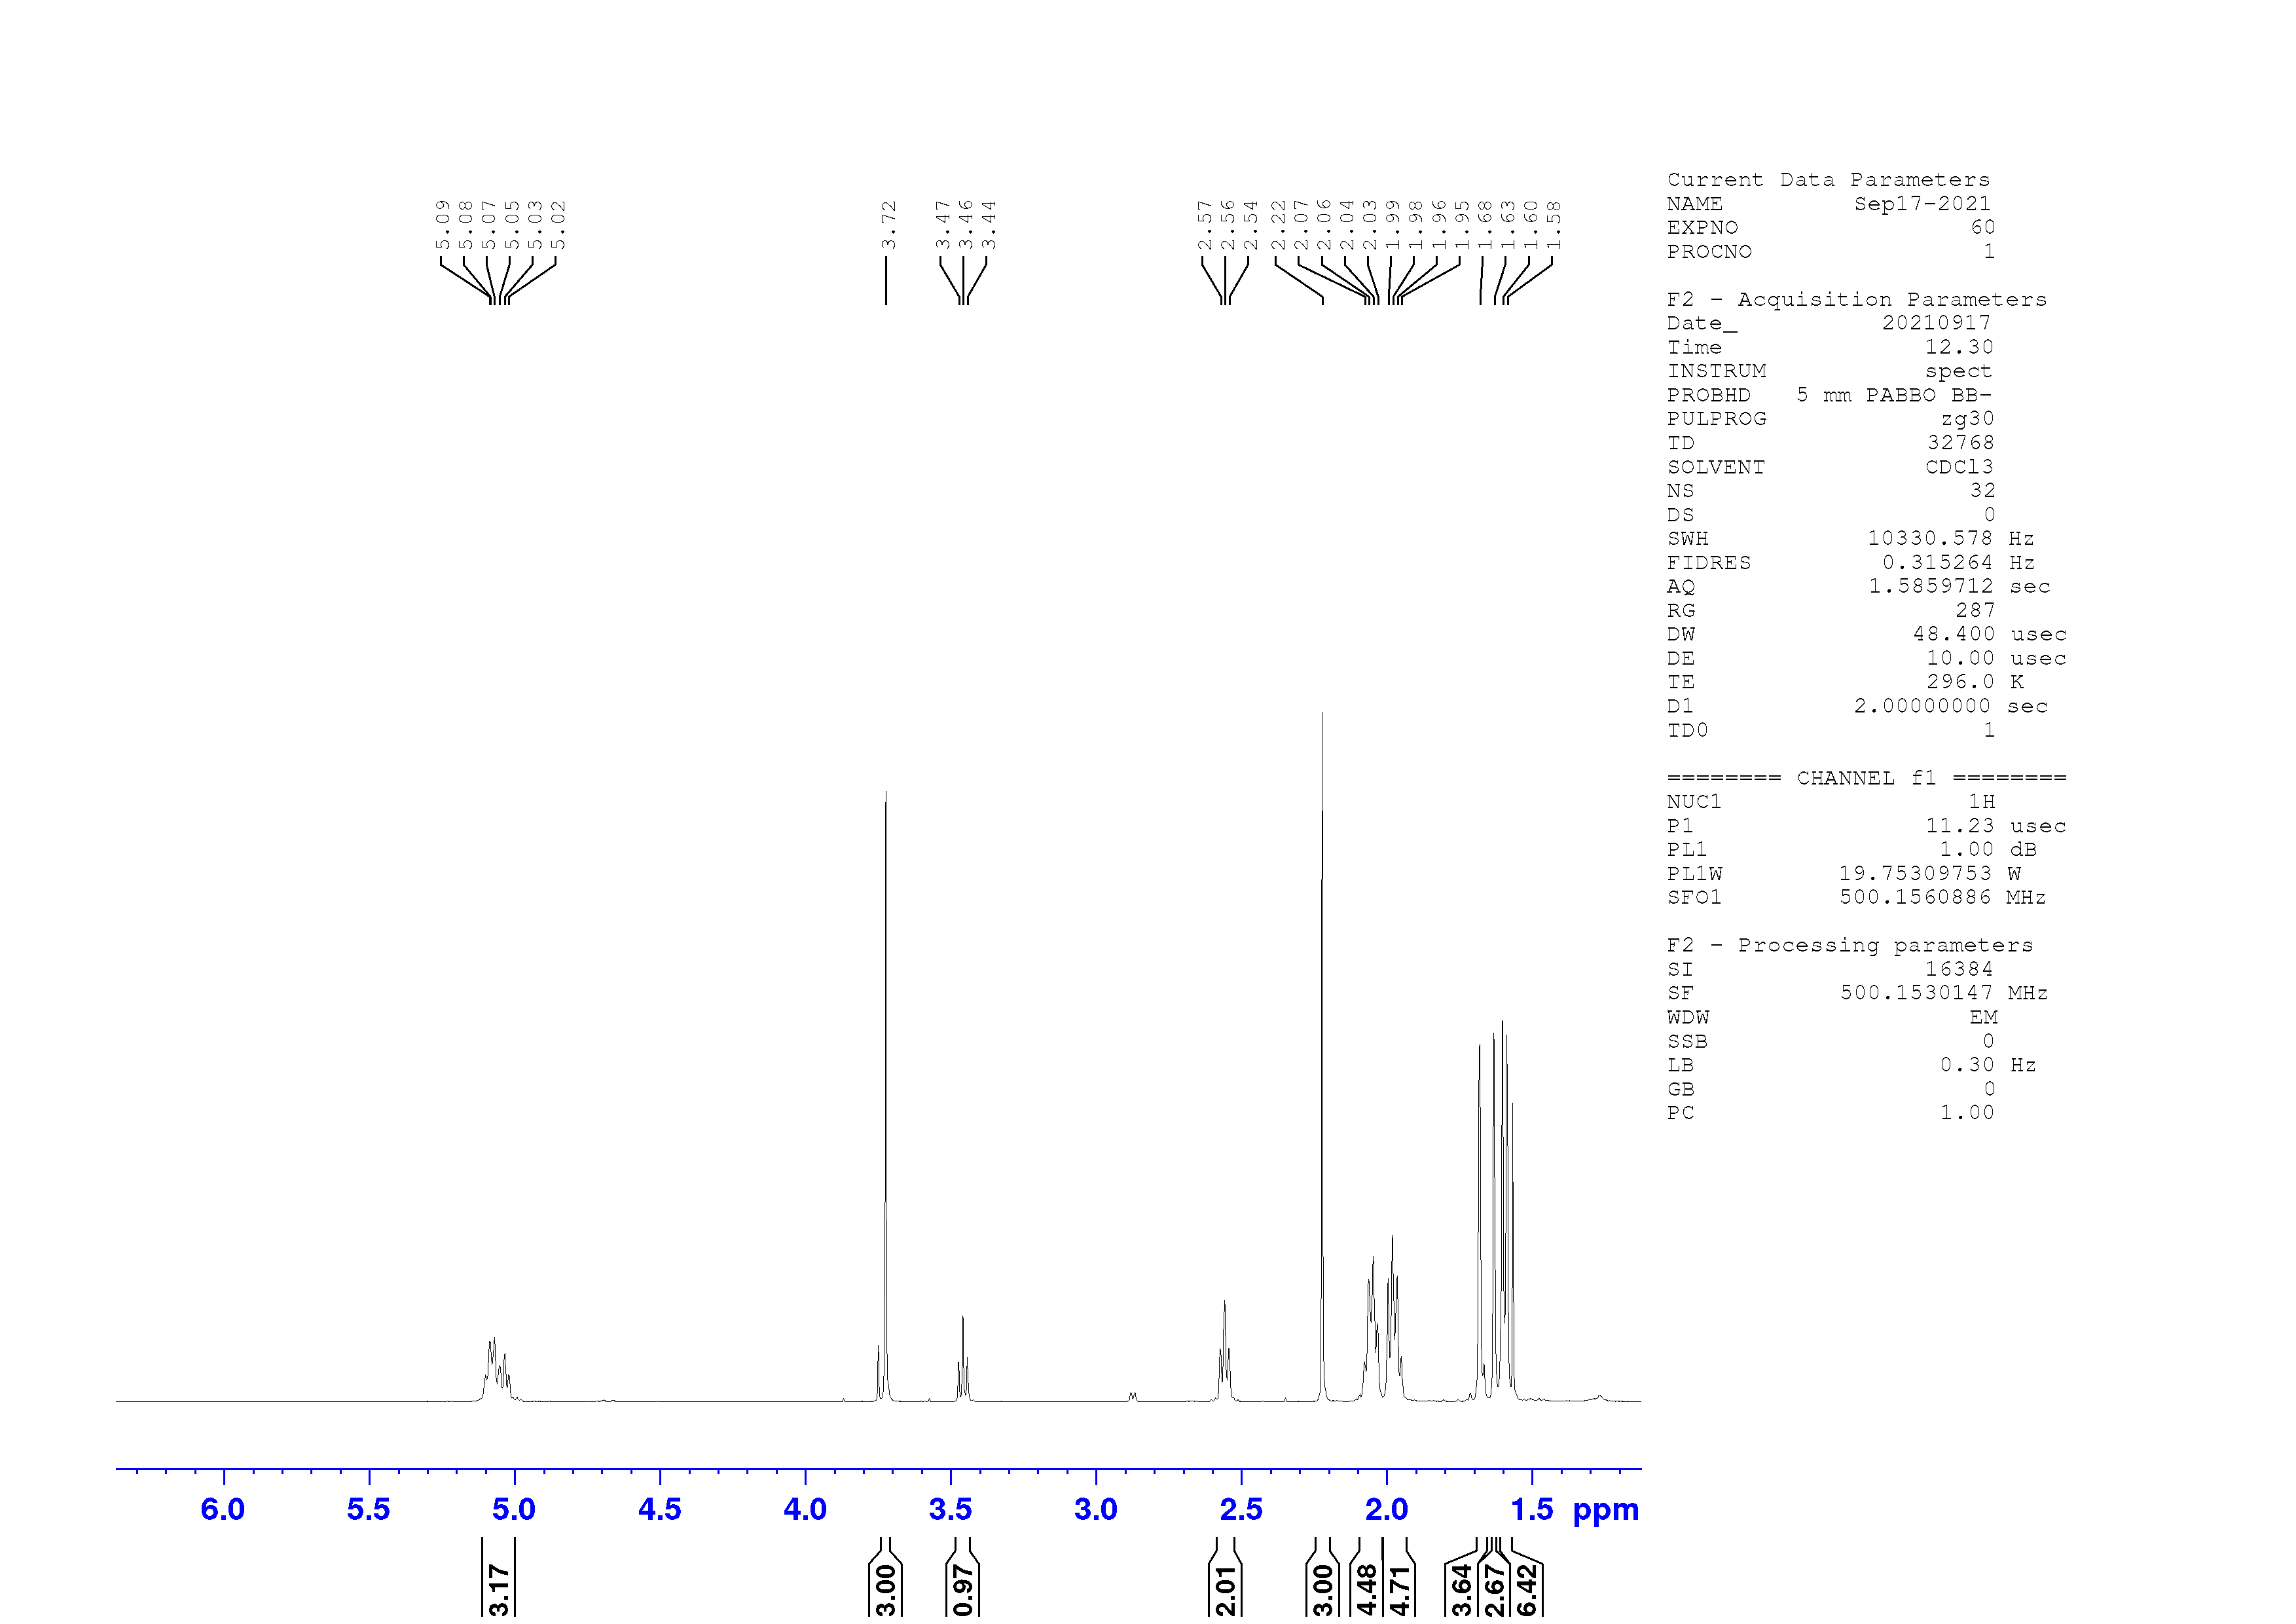


**13C of β-keto ester (15)**


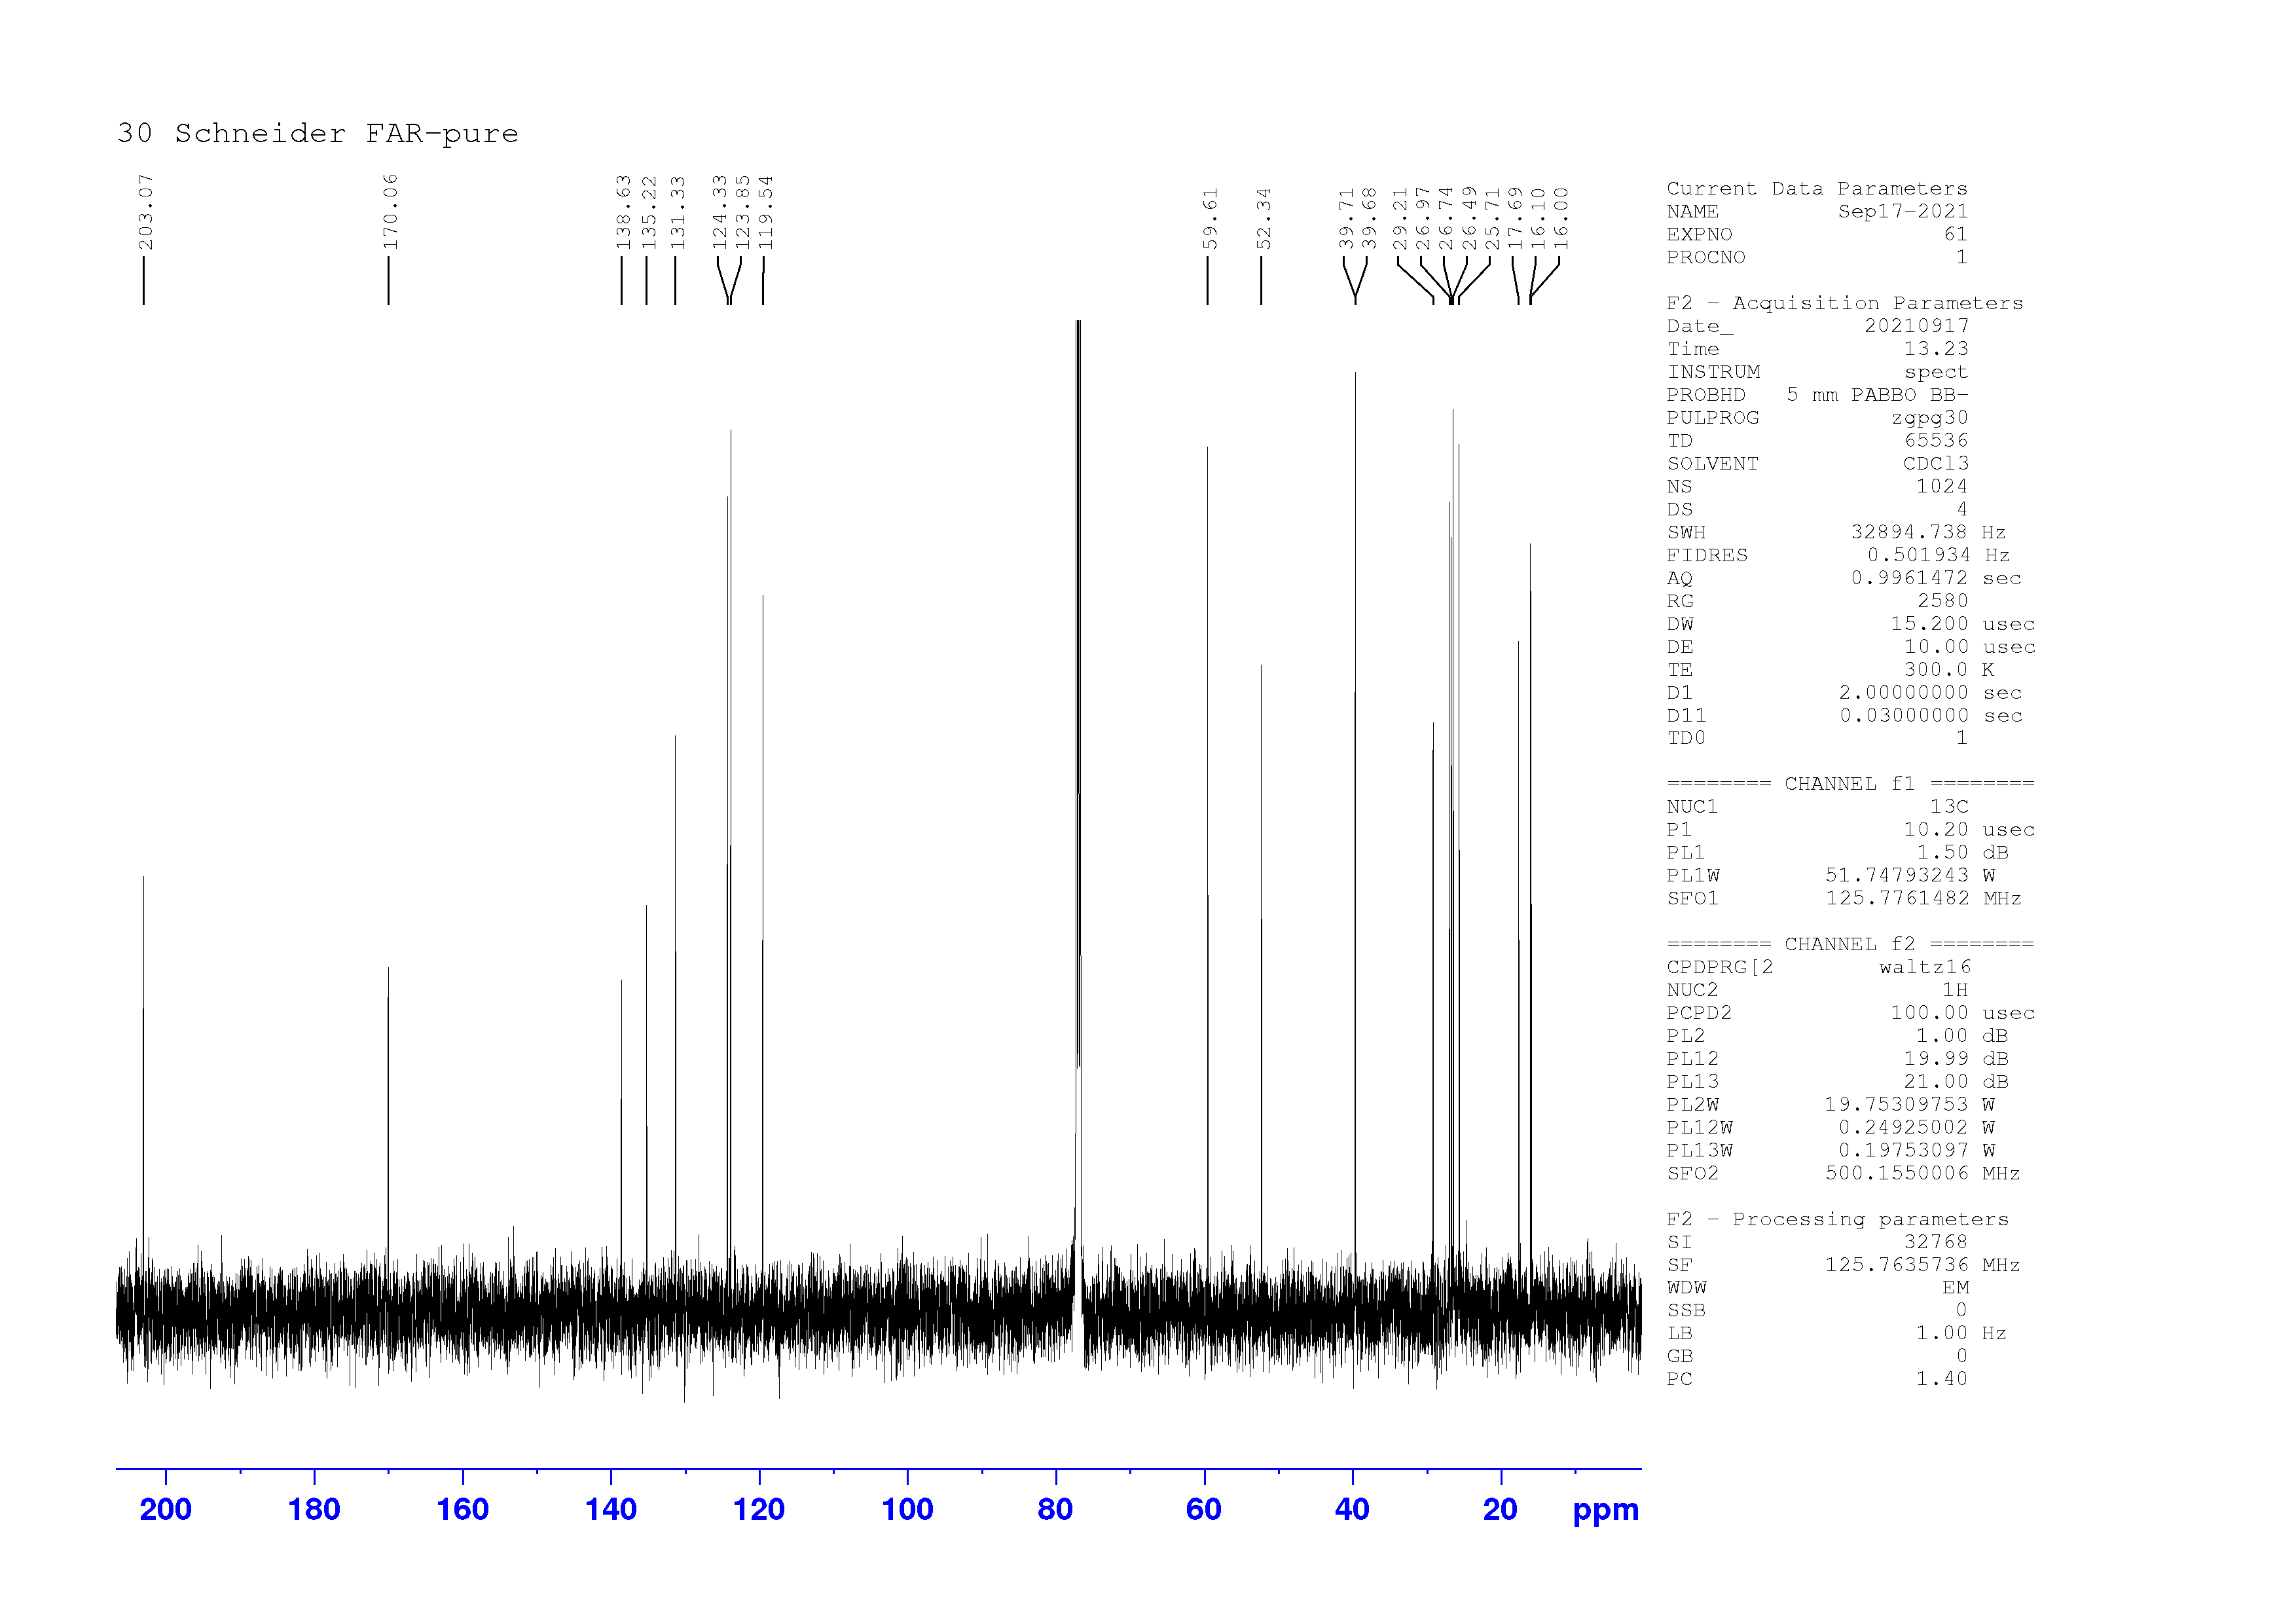


**1H of ketone intermediate (P-1)**


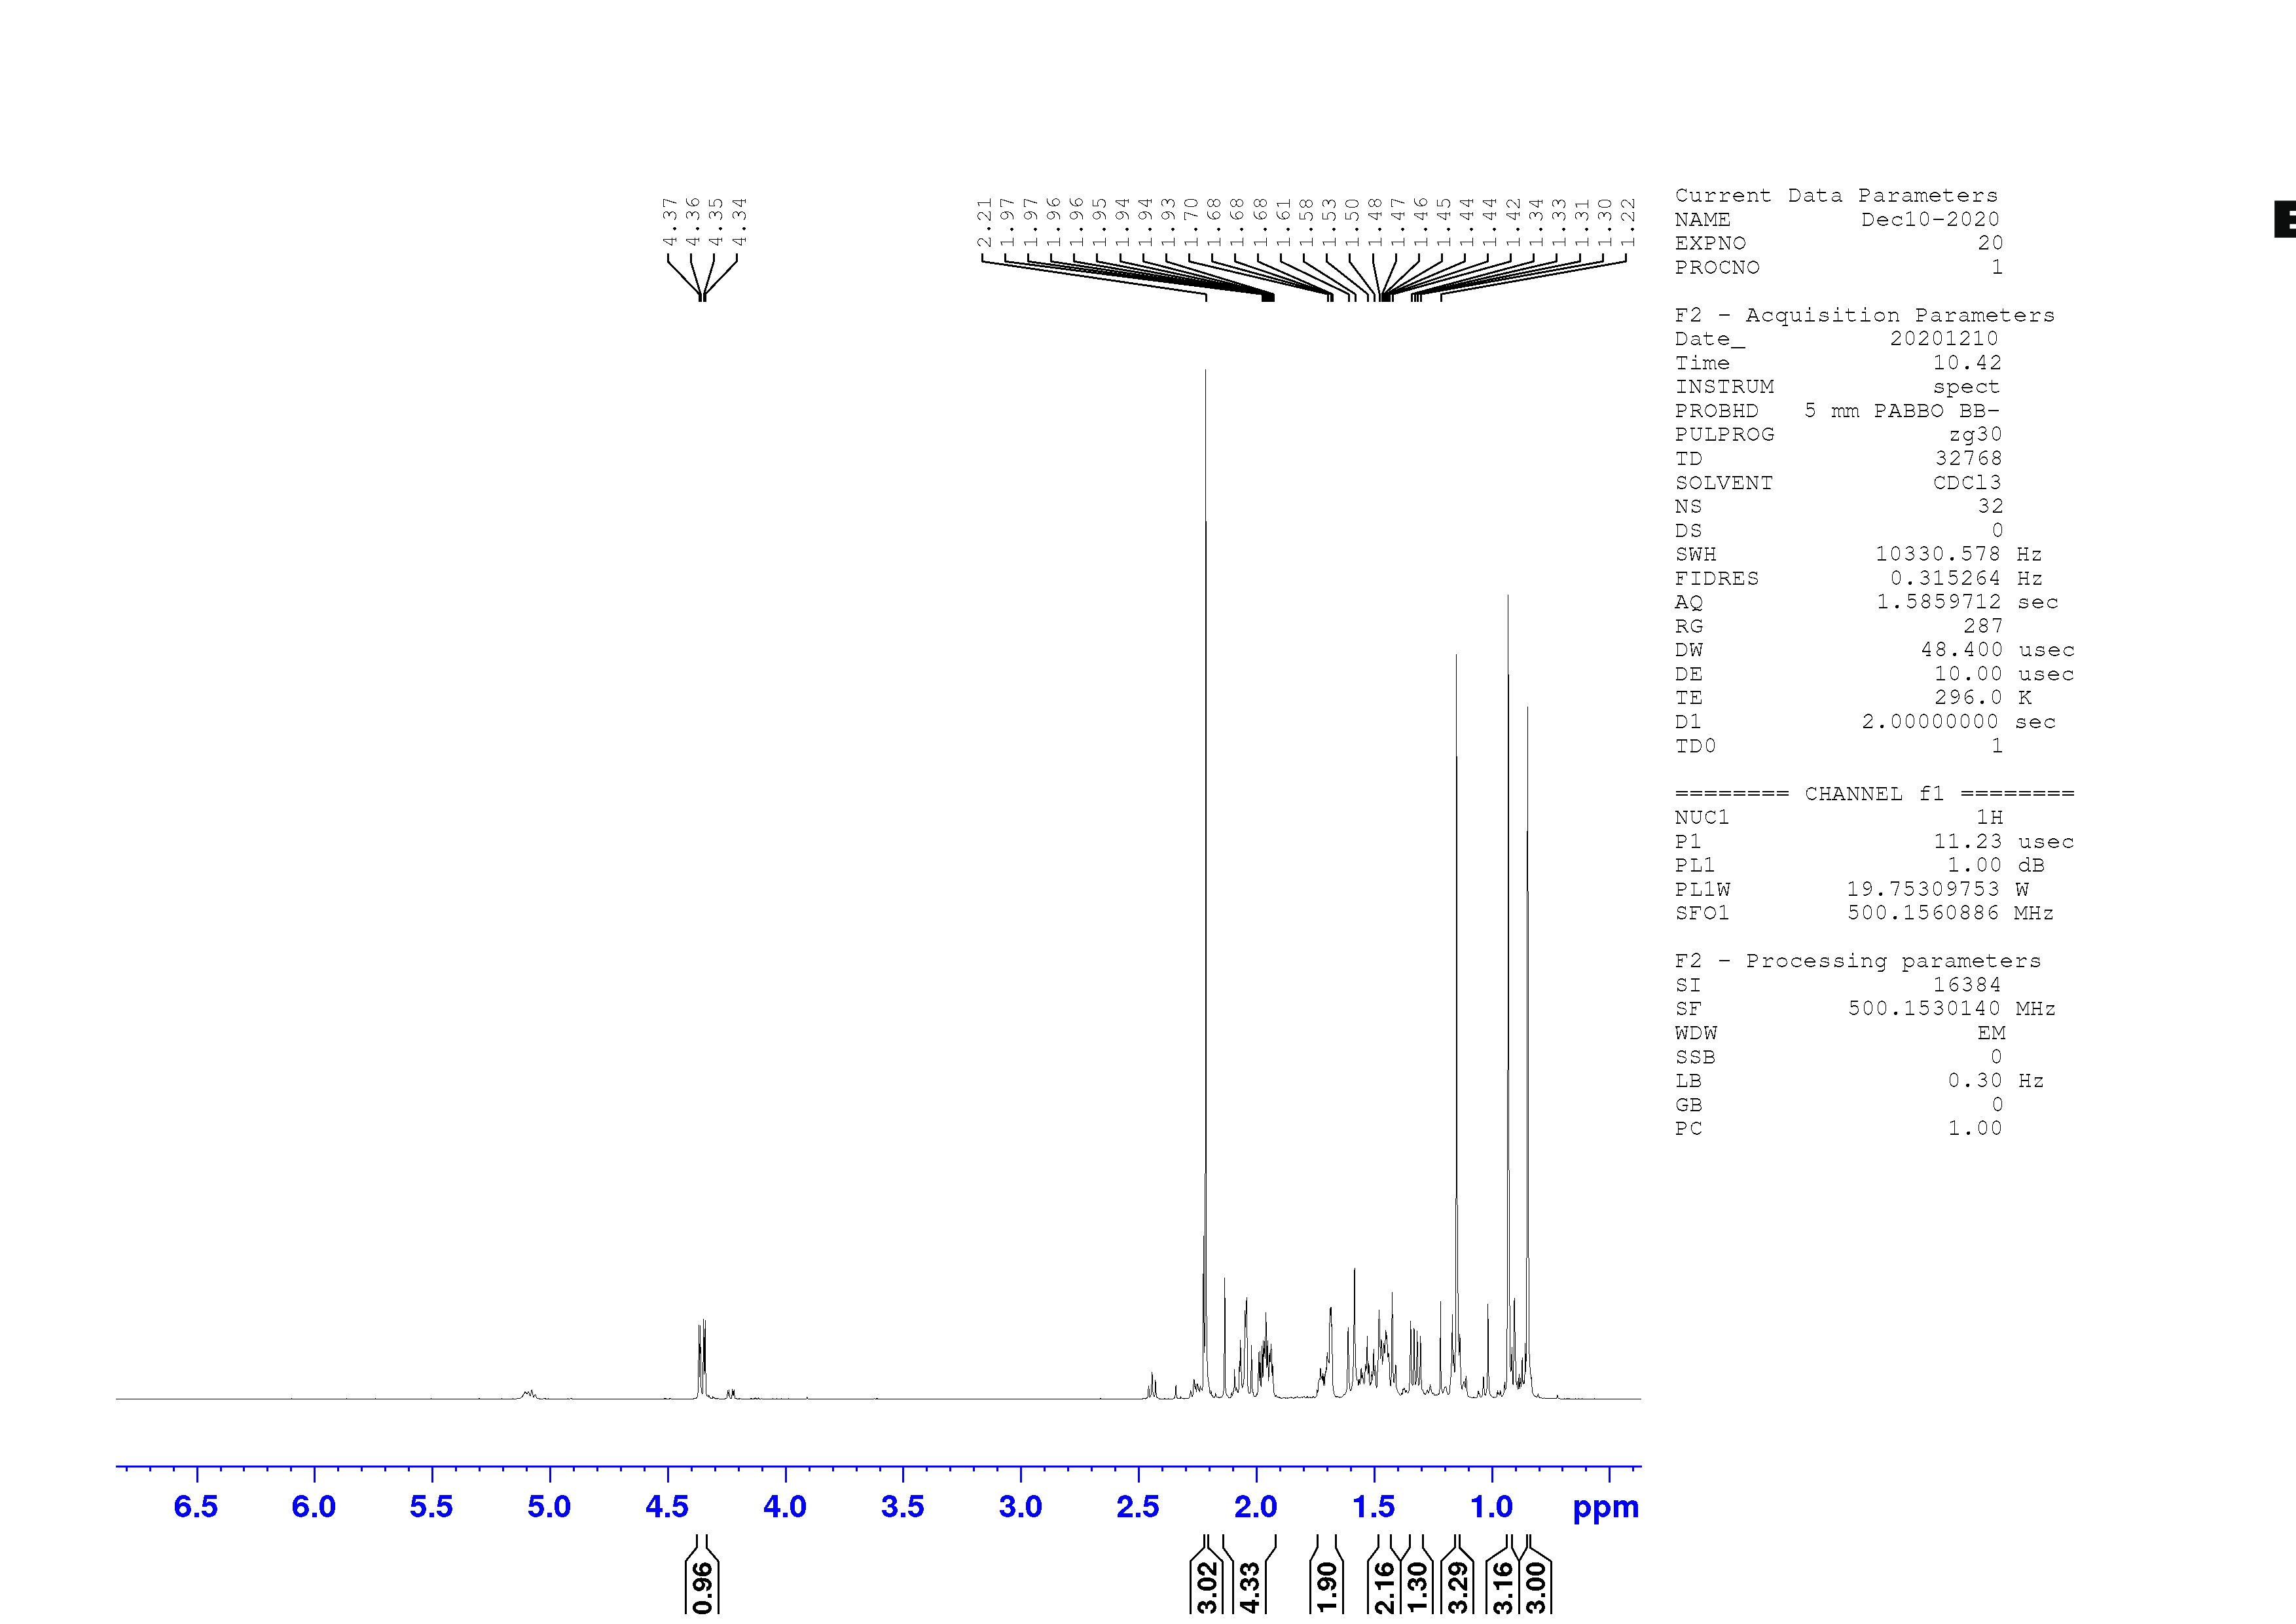


**13C of ketone intermediate (P-1)**


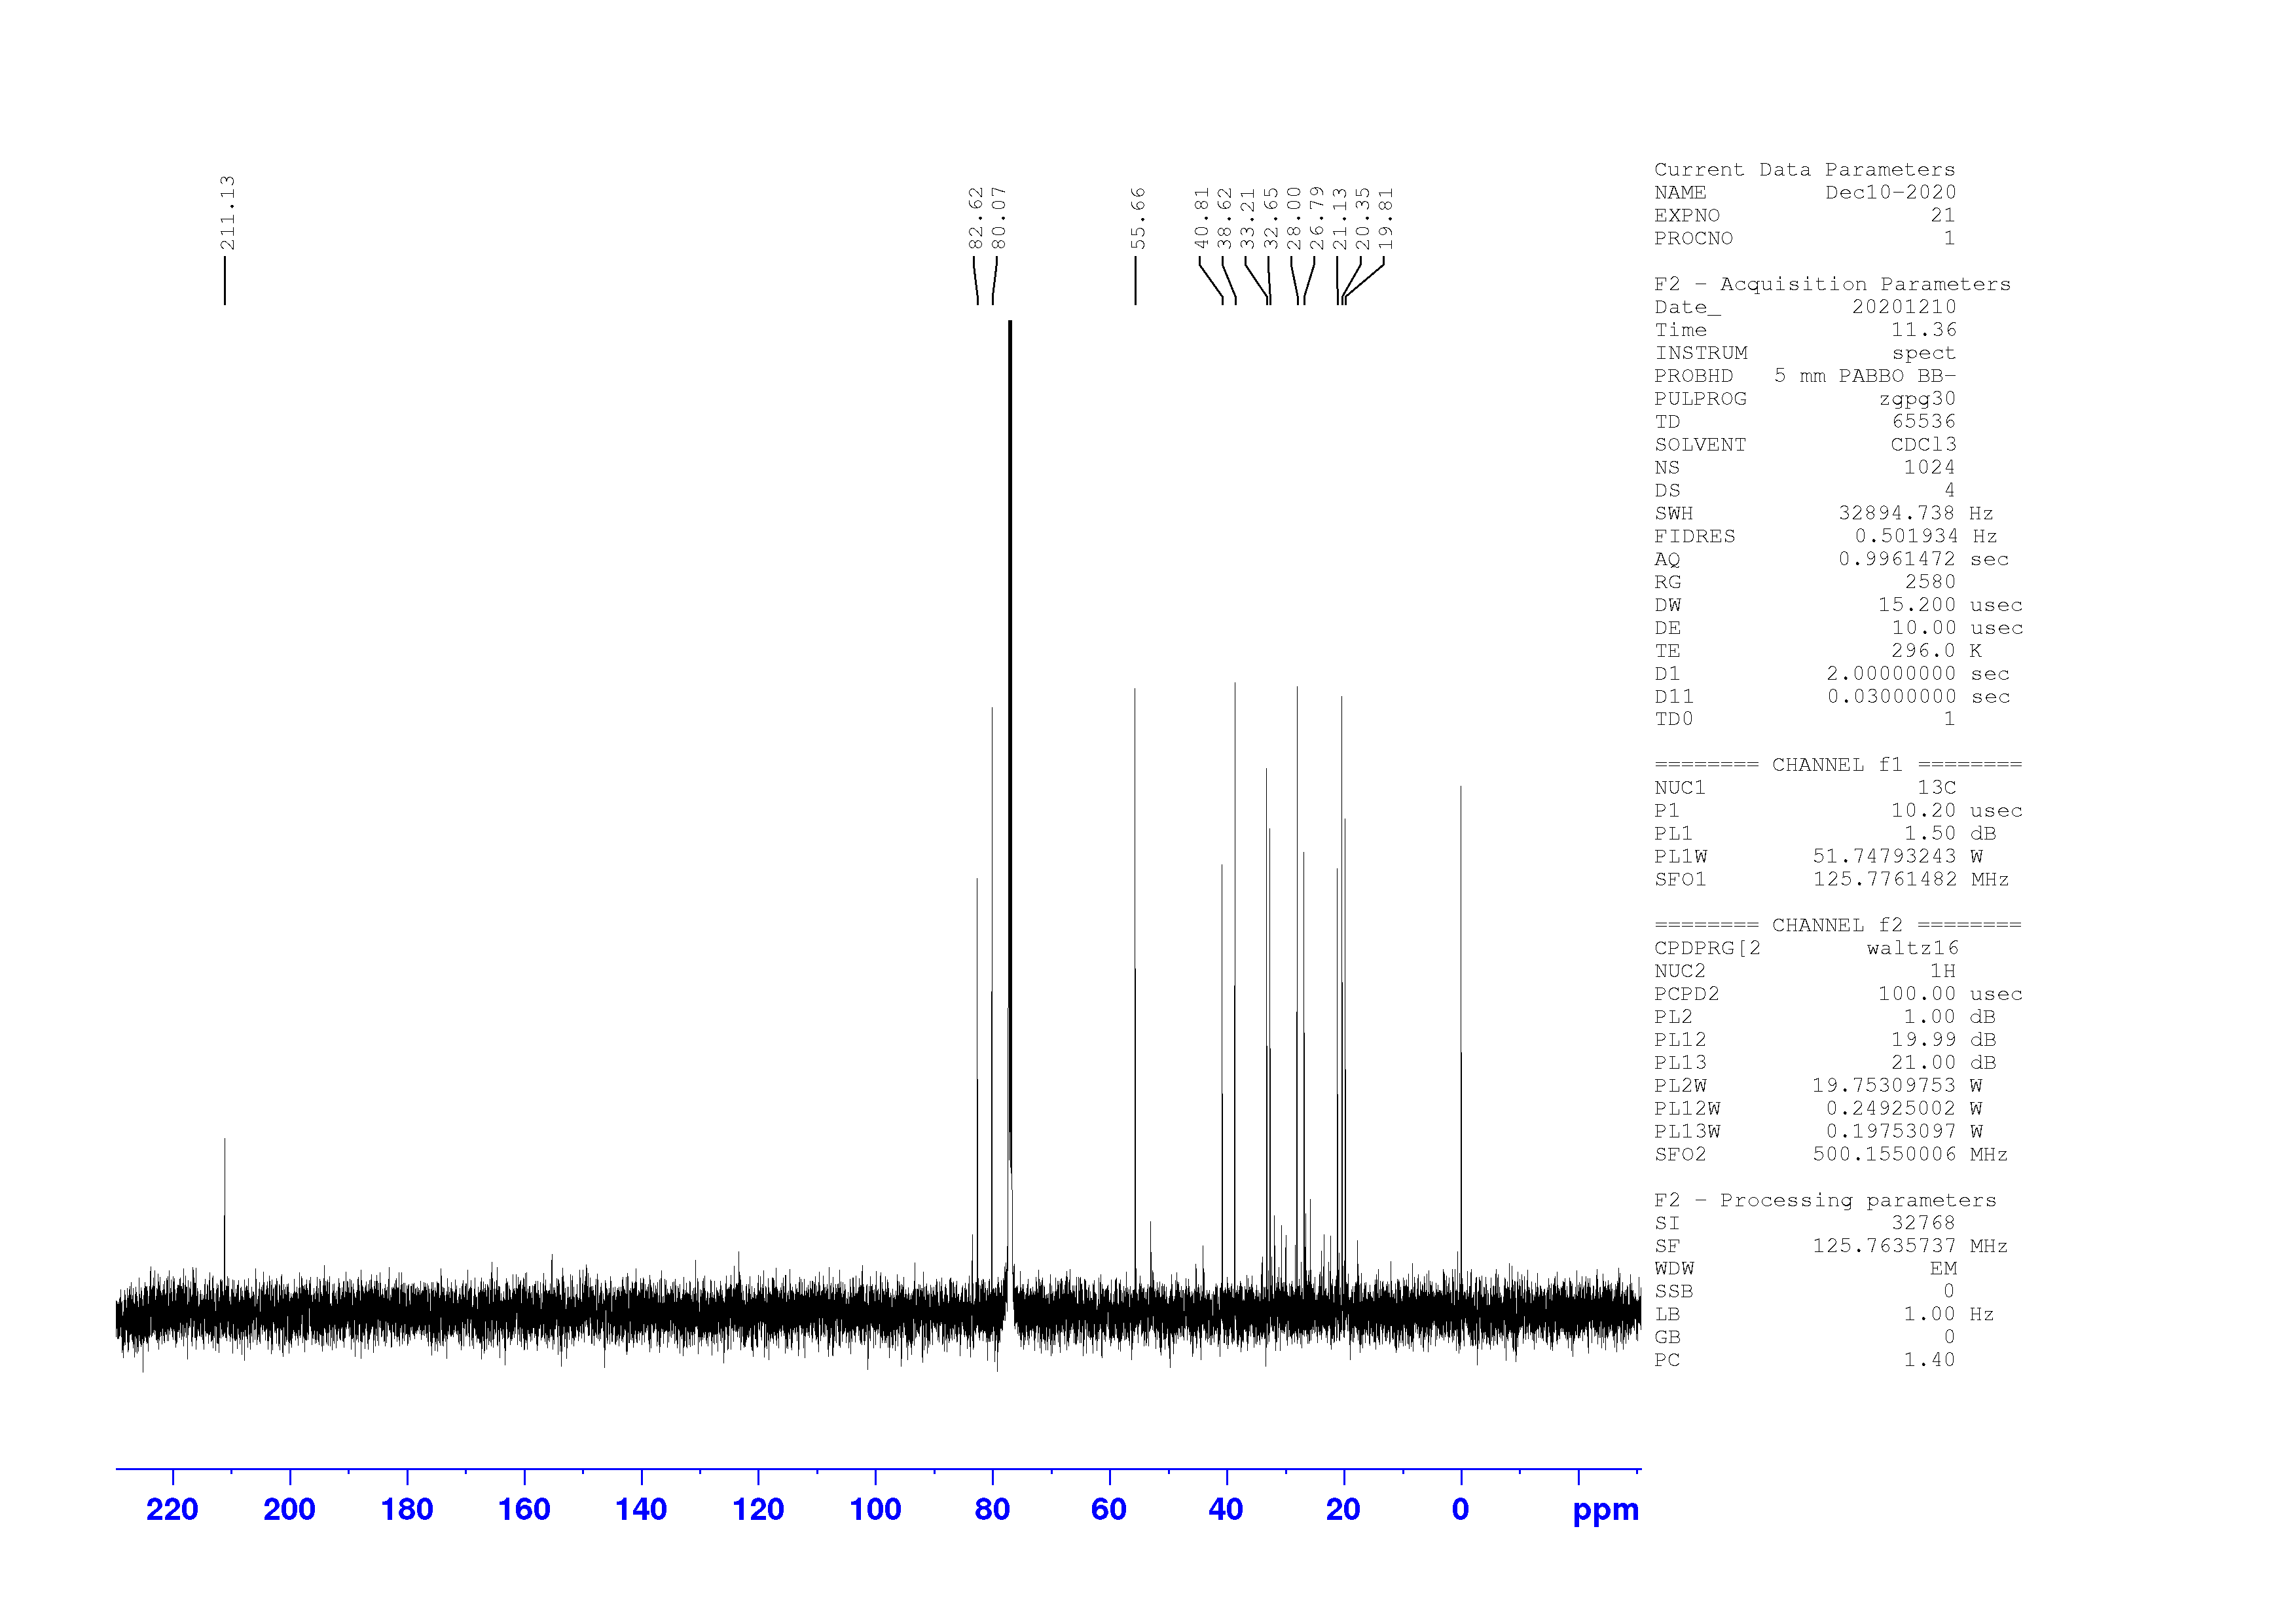


**1H of ketone intermediate (P-2)**


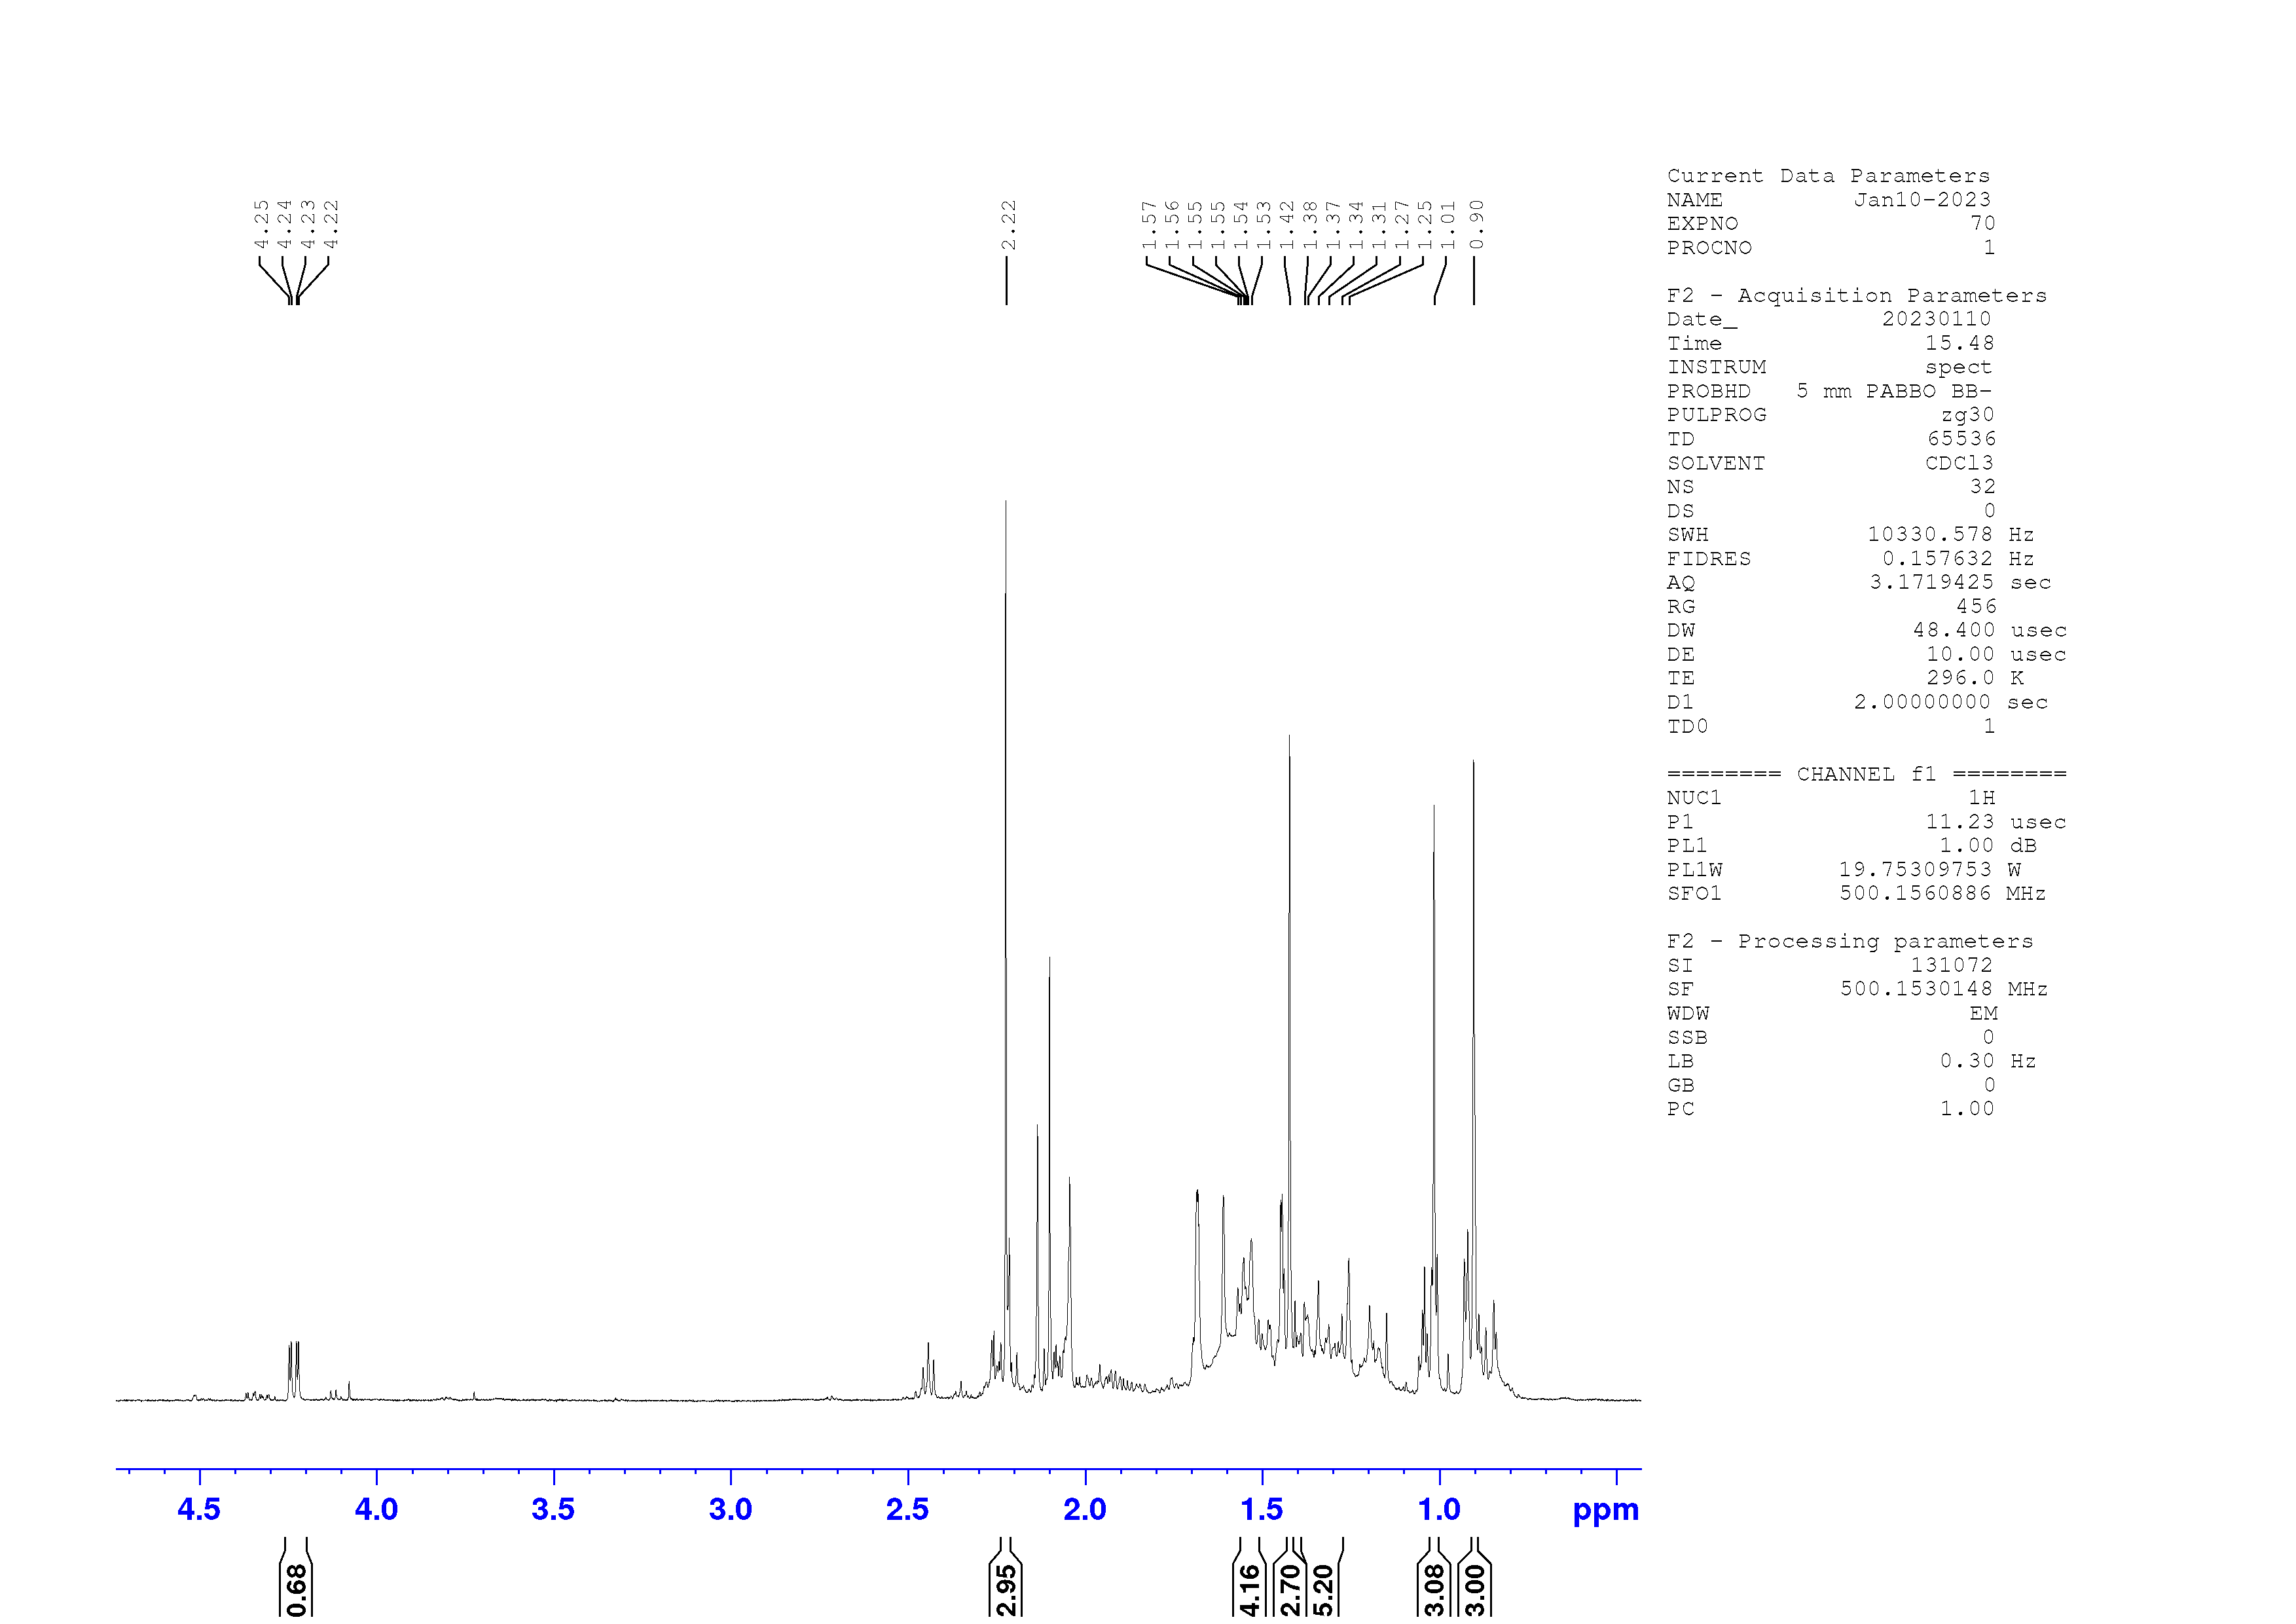


**13C of ketone intermediate (P-2)**


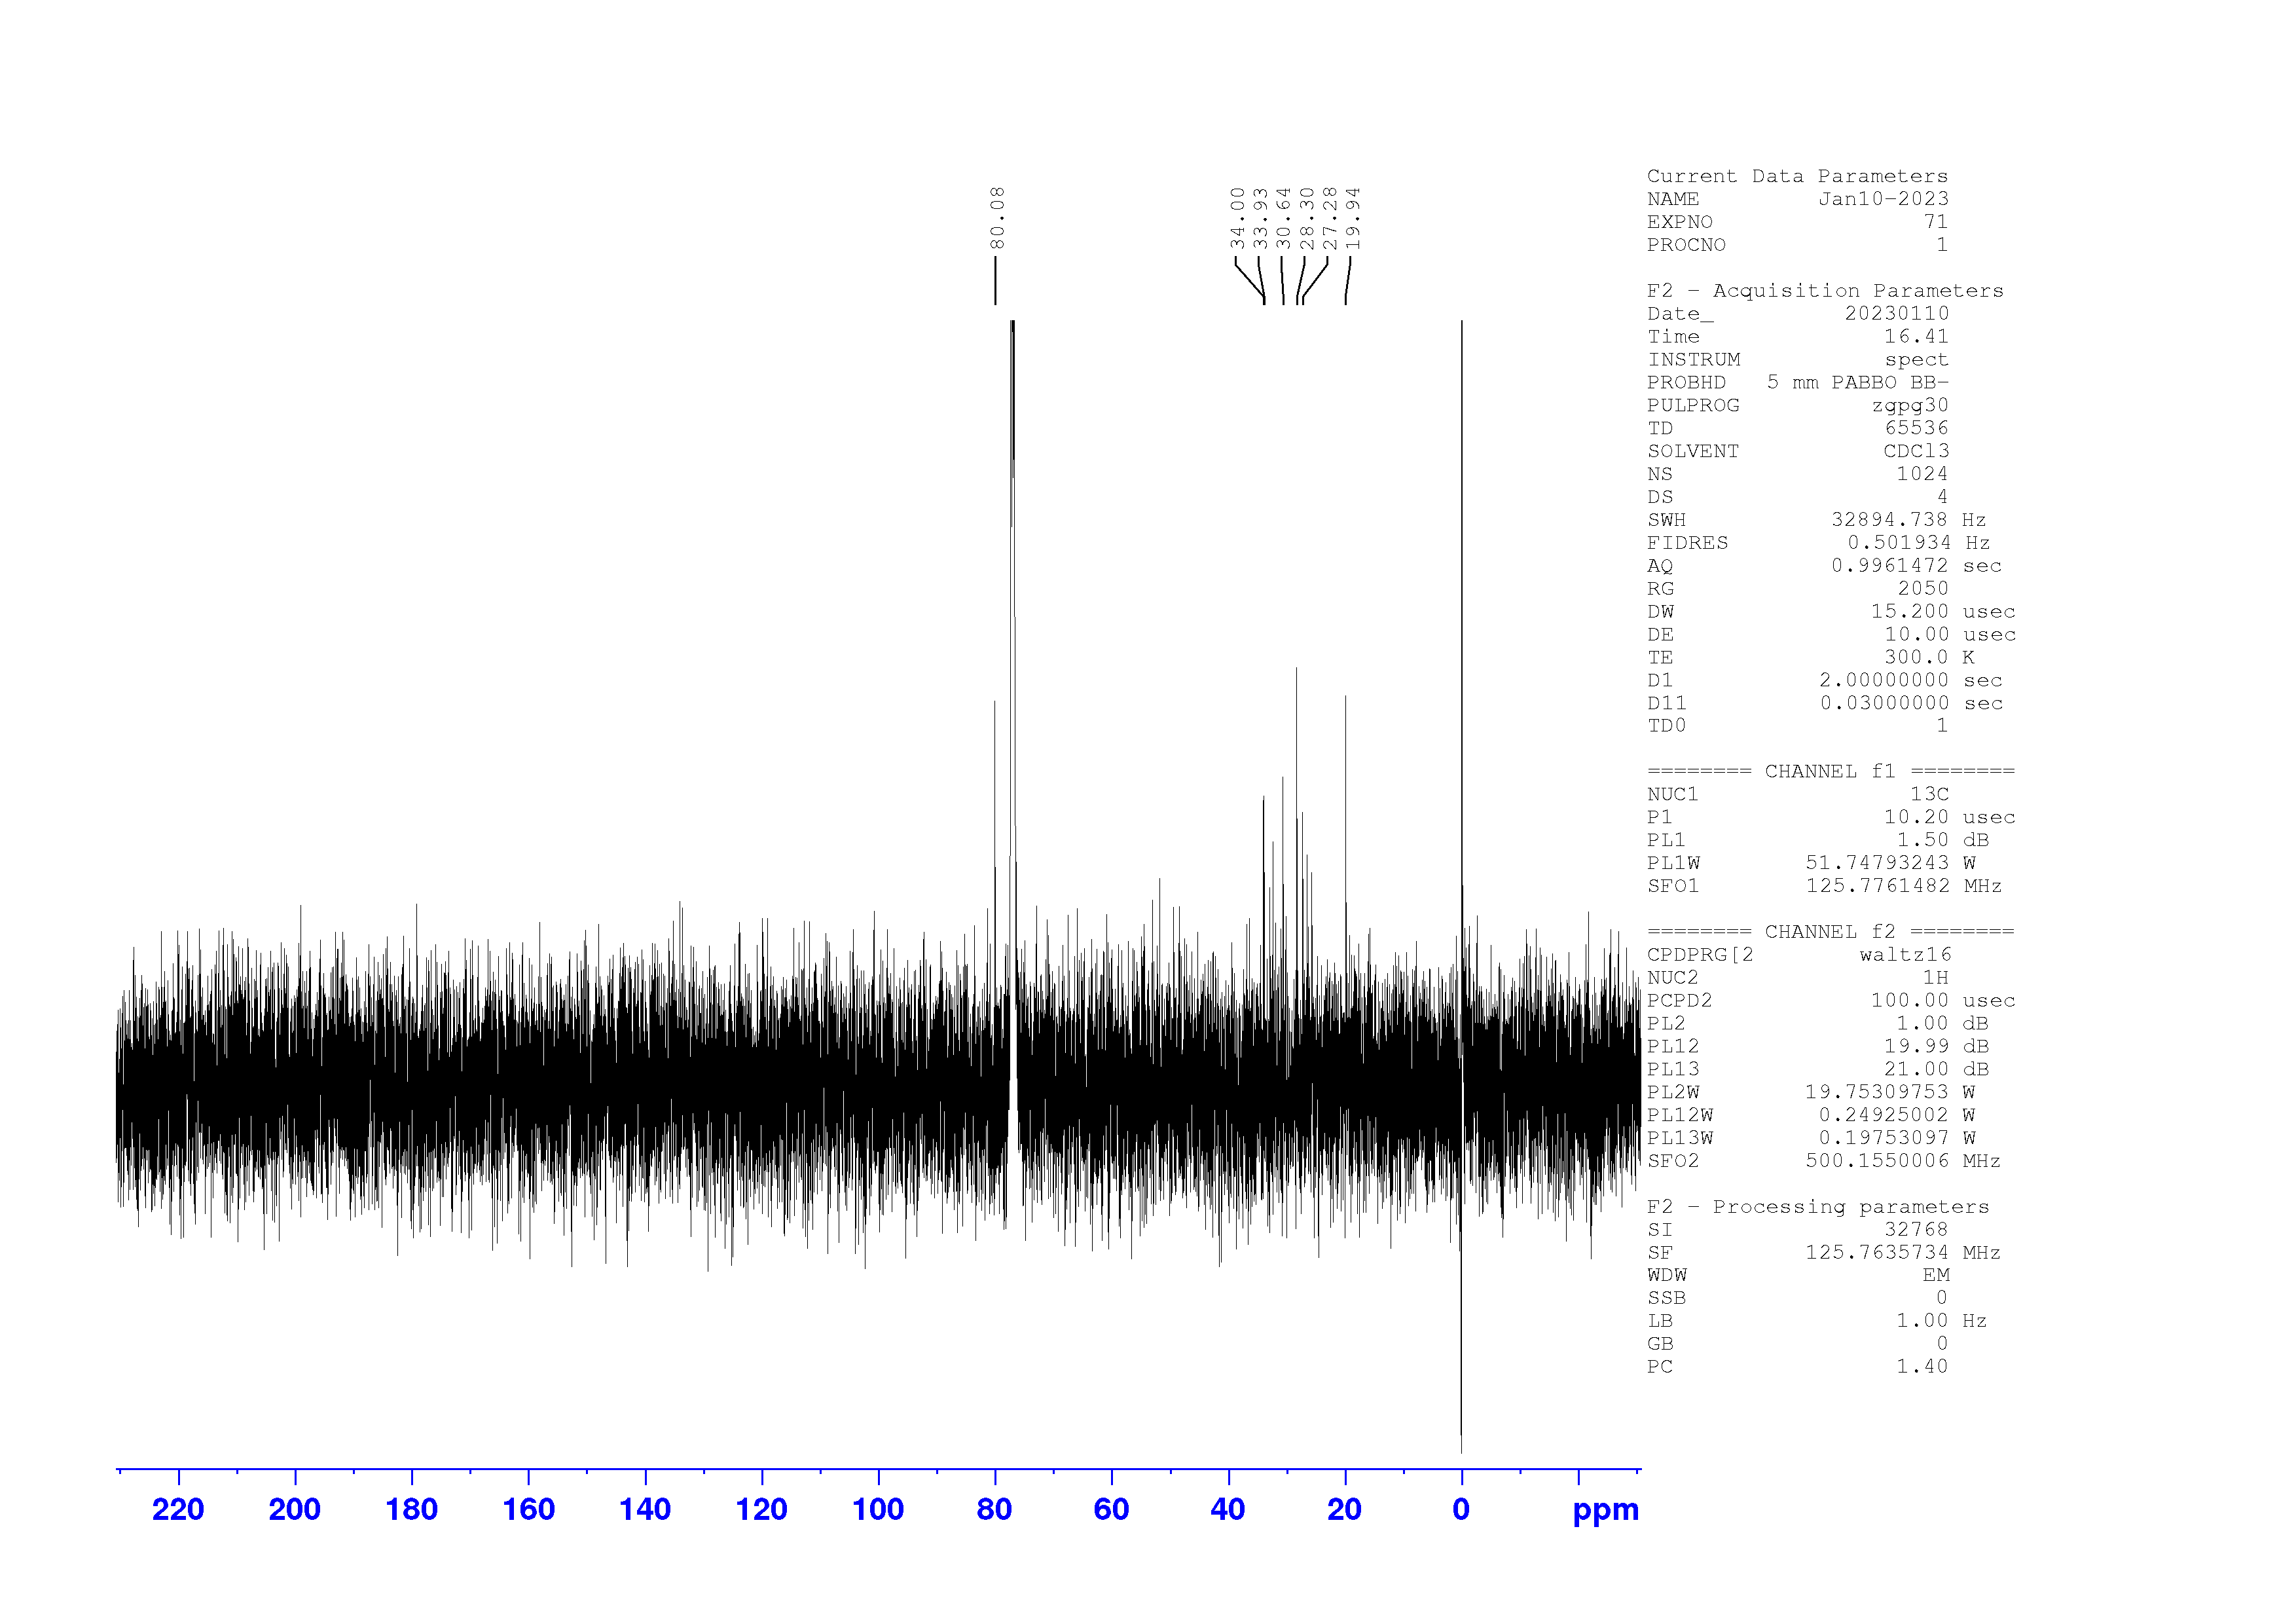


**1H of ketone intermediate (P-3)**


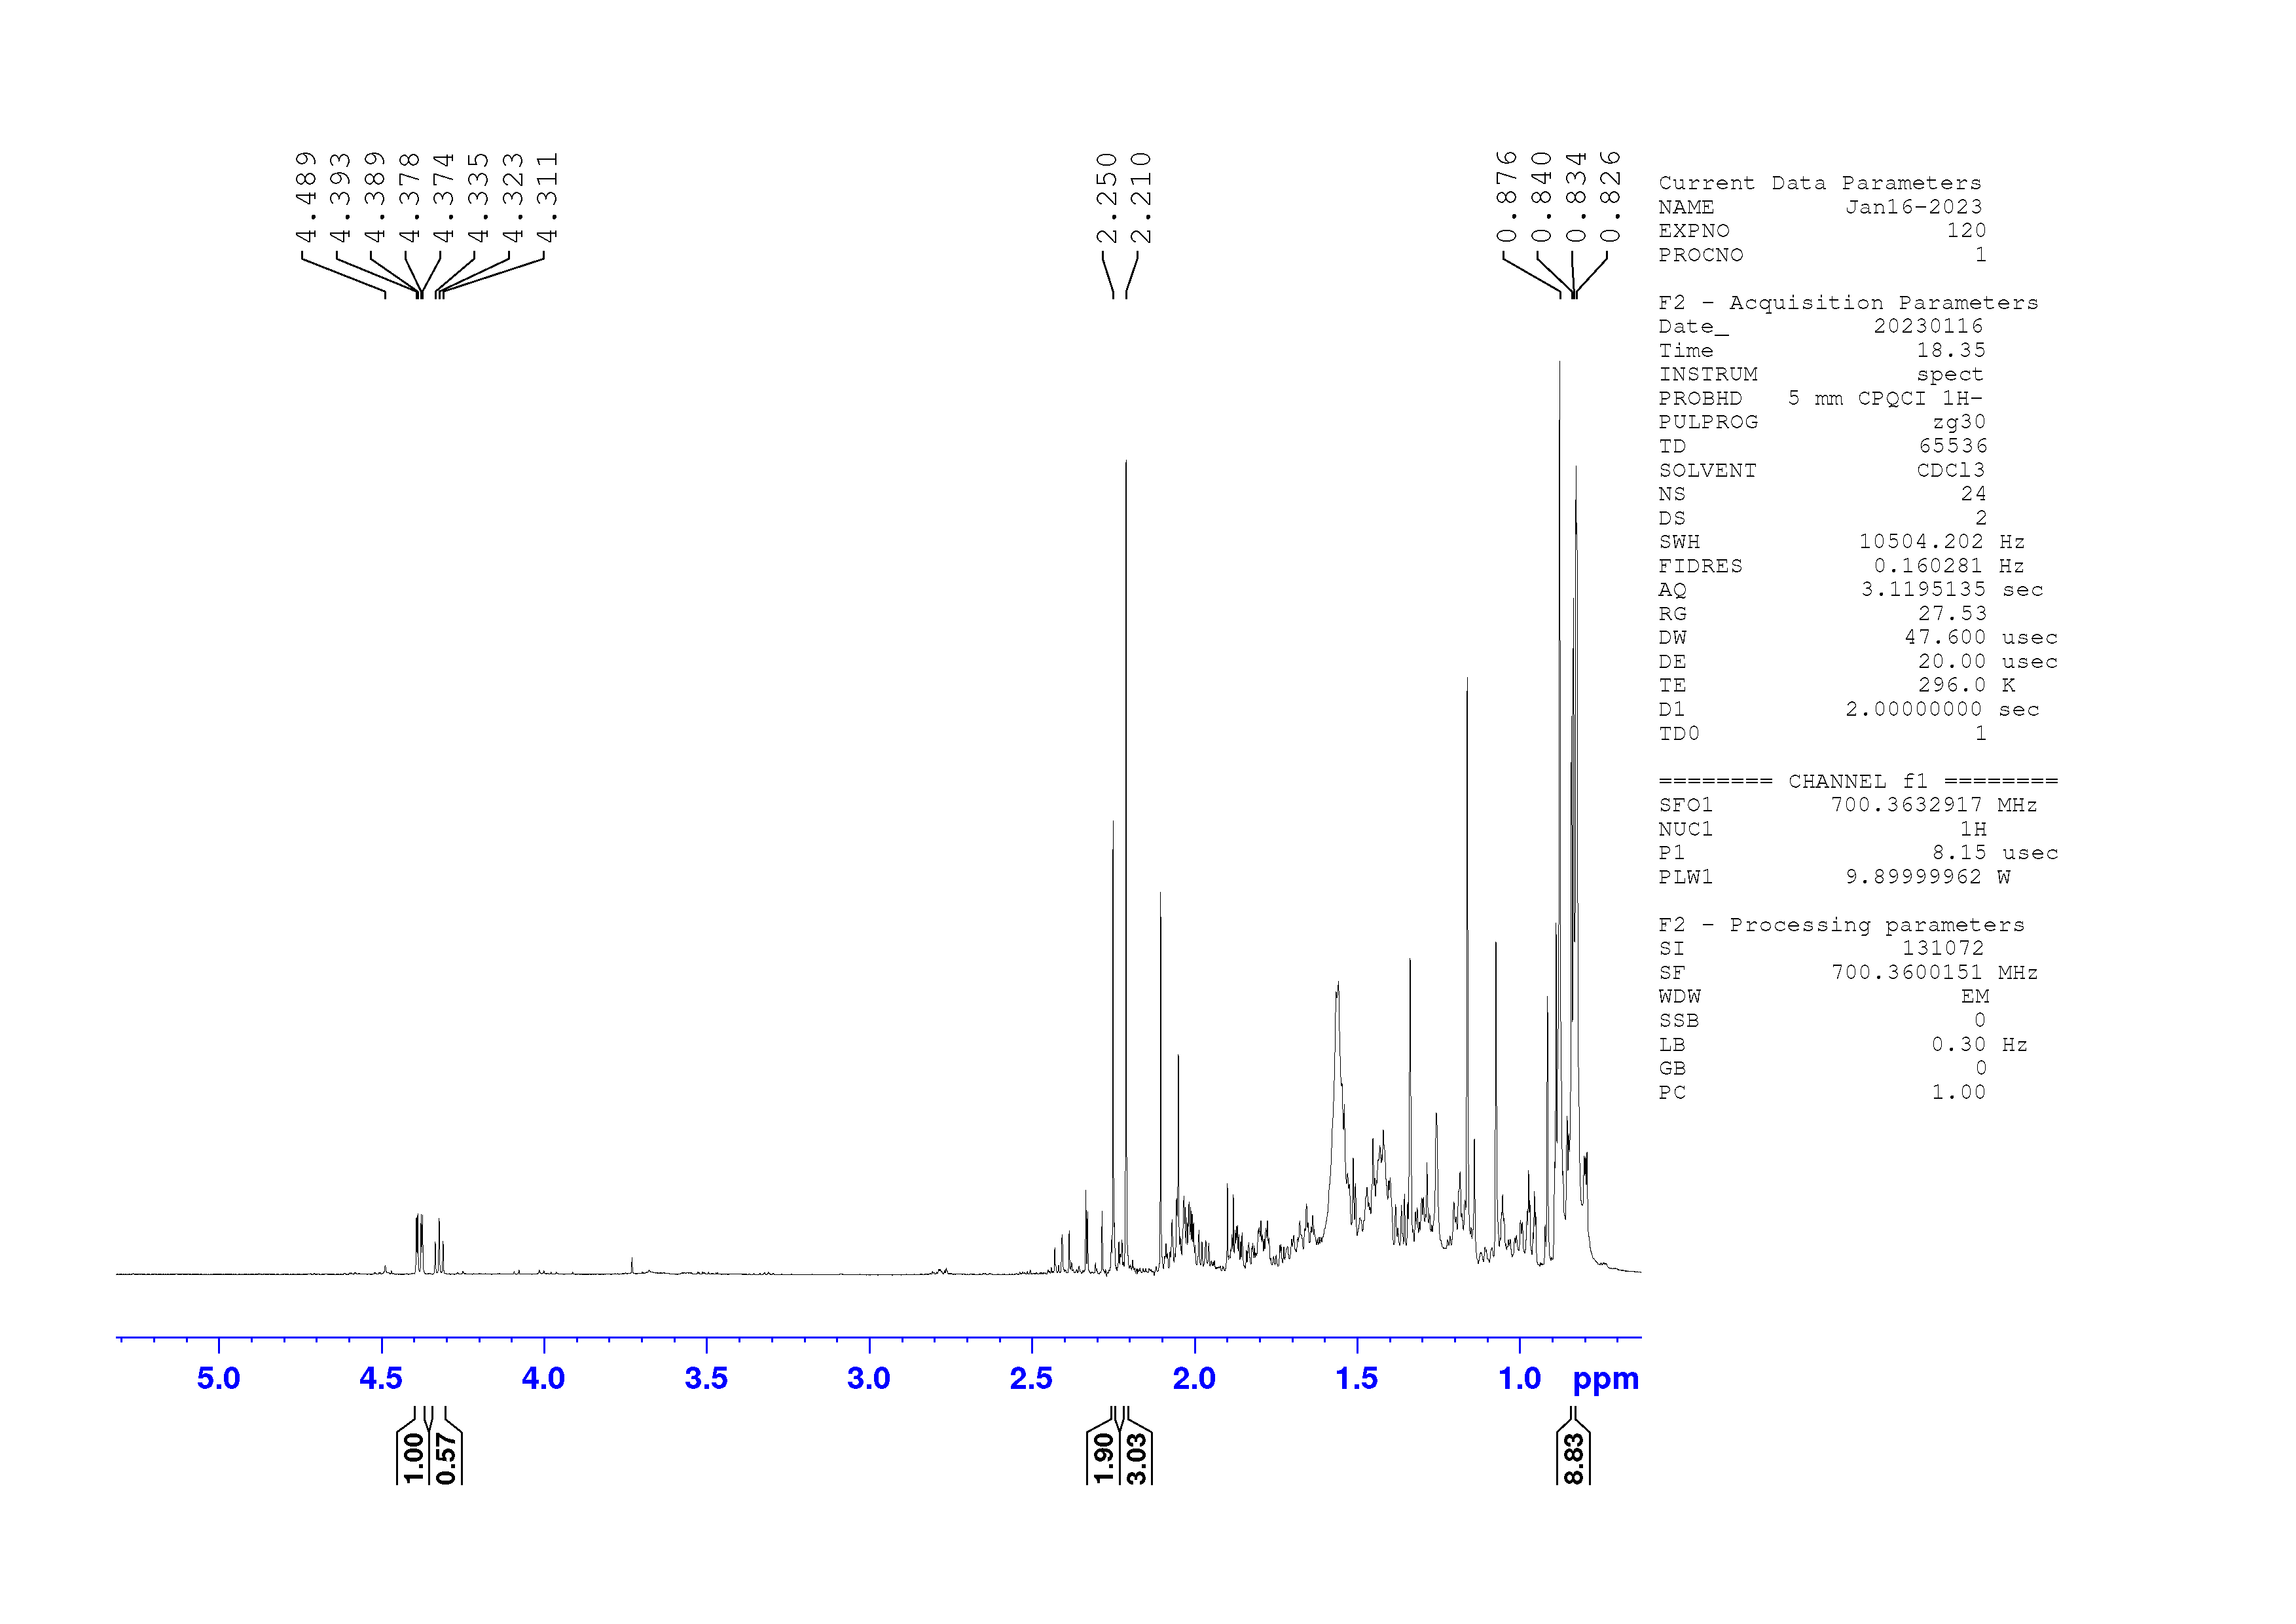


**13C of ketone intermediate (P-3)**


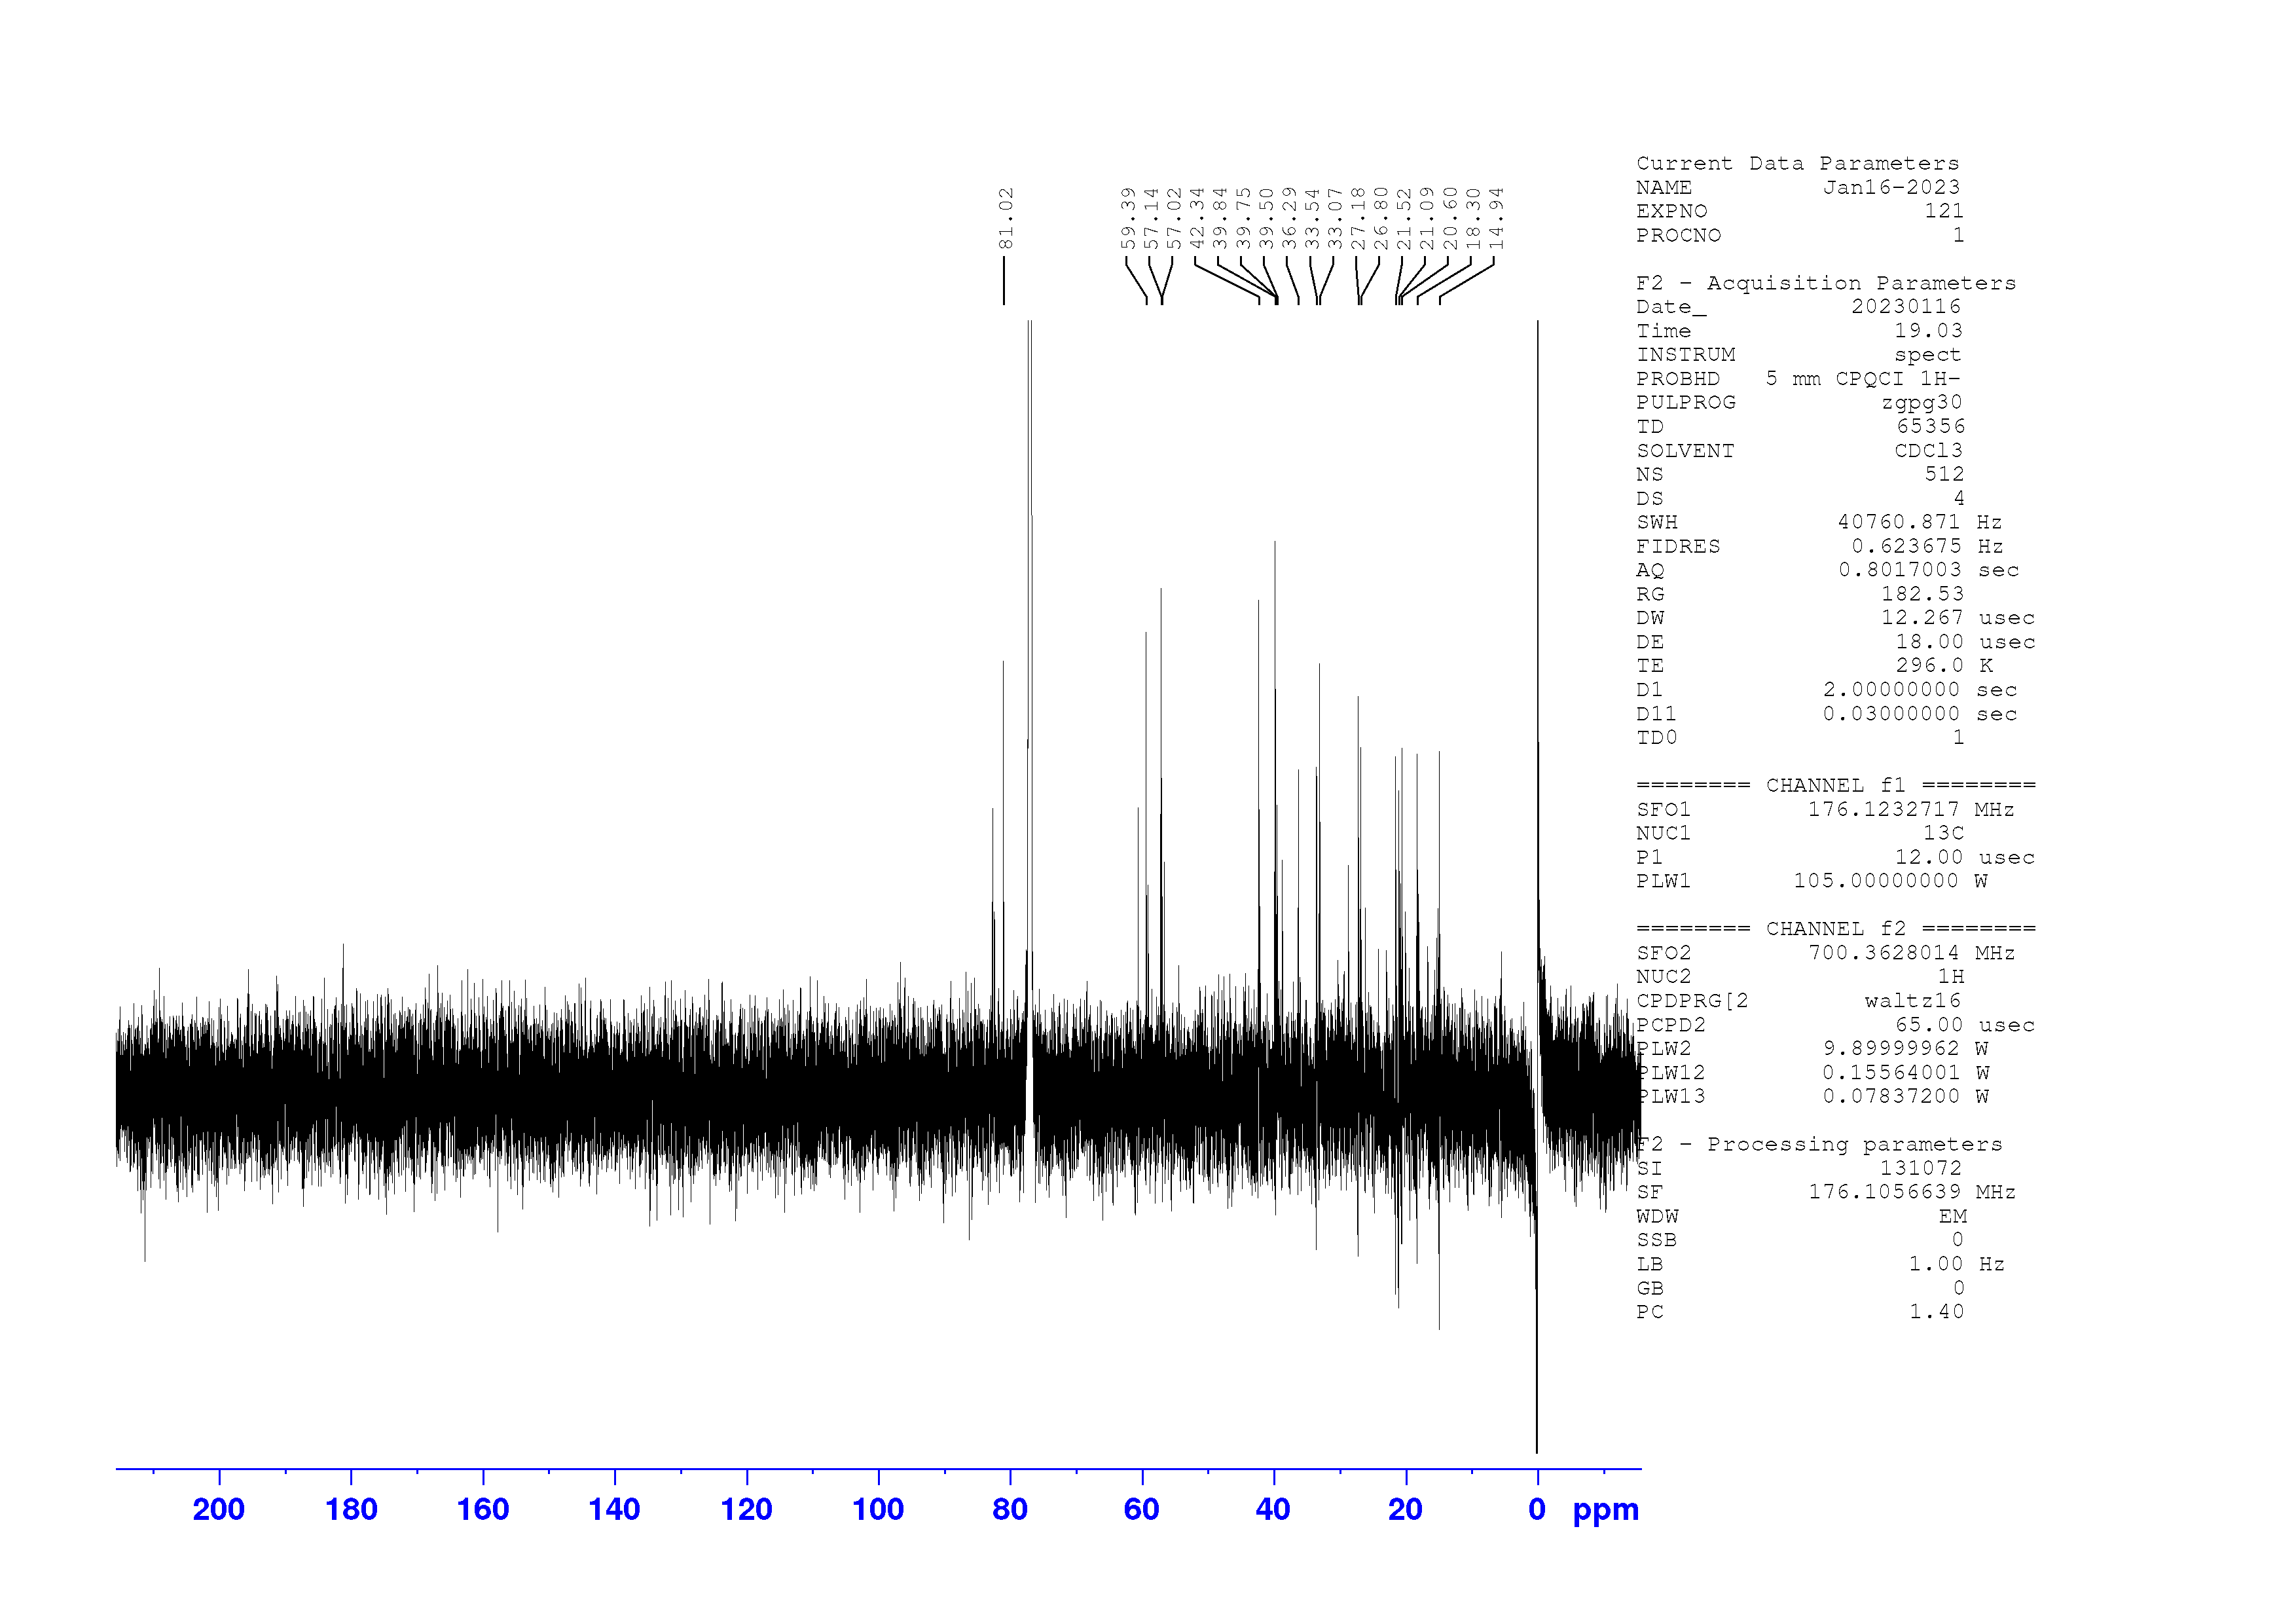


**1H of trans-tetrahydroactinidiolide (1), grease impurity**


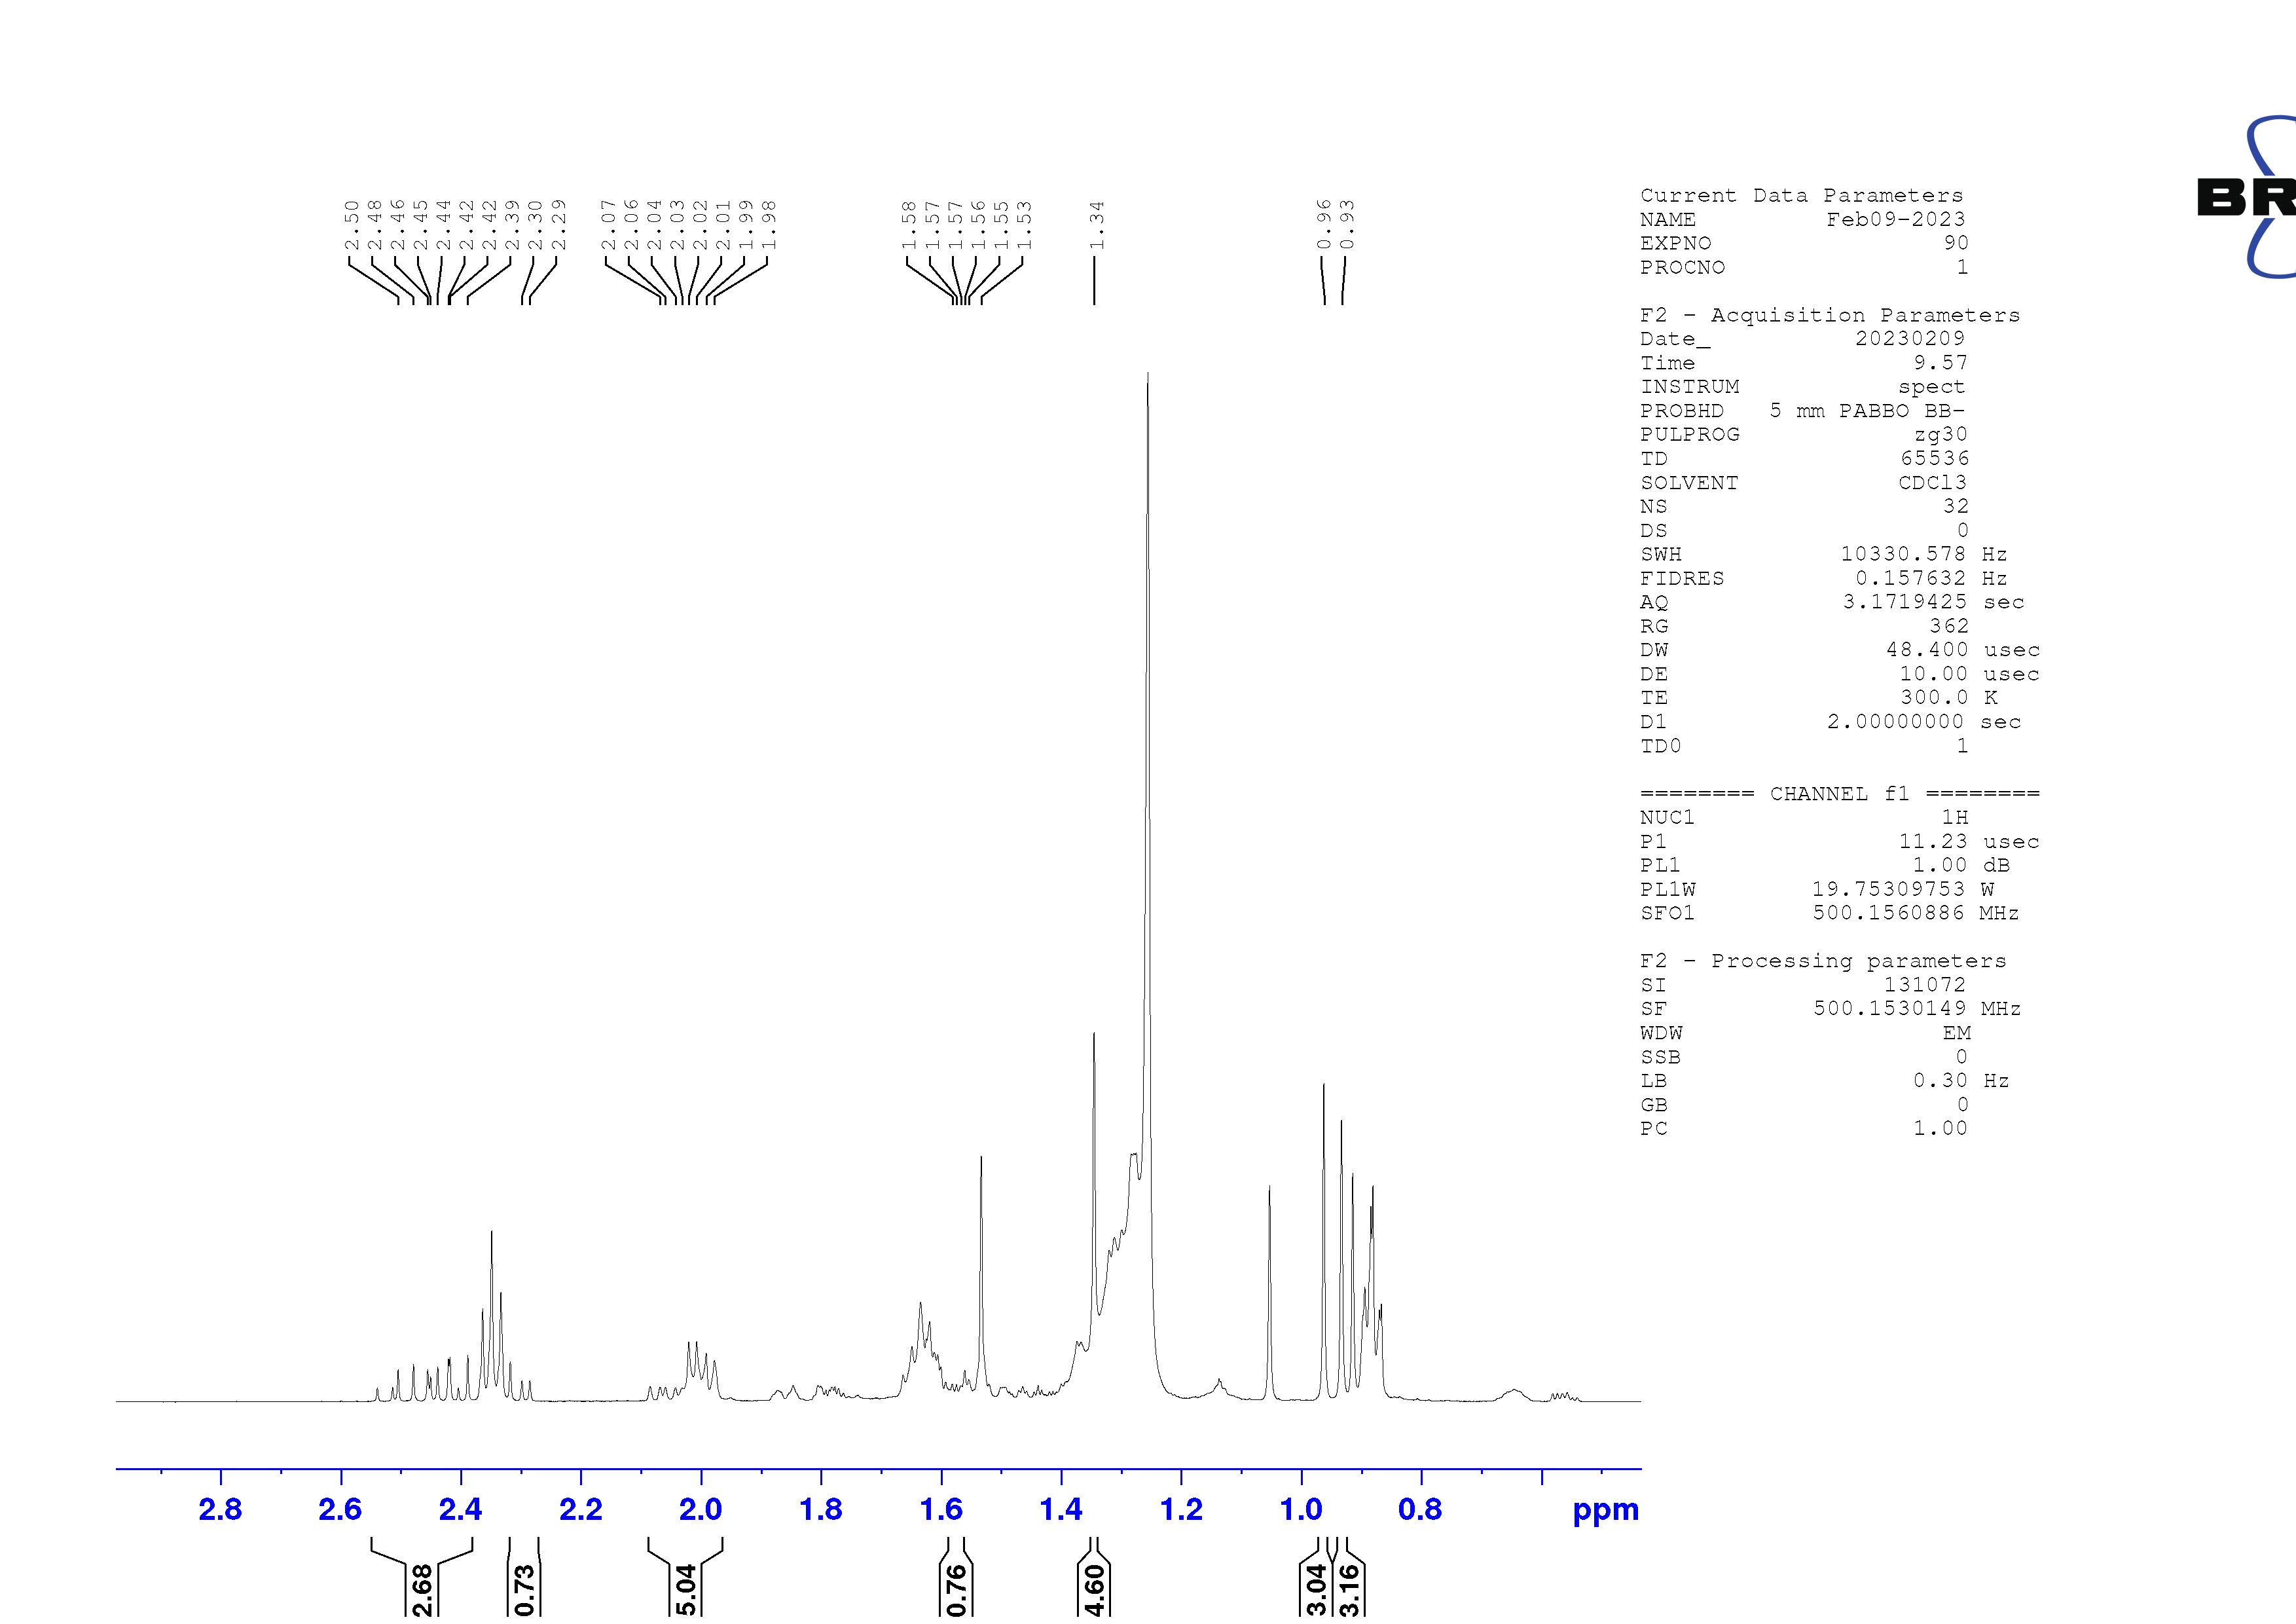


**13C of trans-tetrahydroactinidiolide (1), grease impurity**


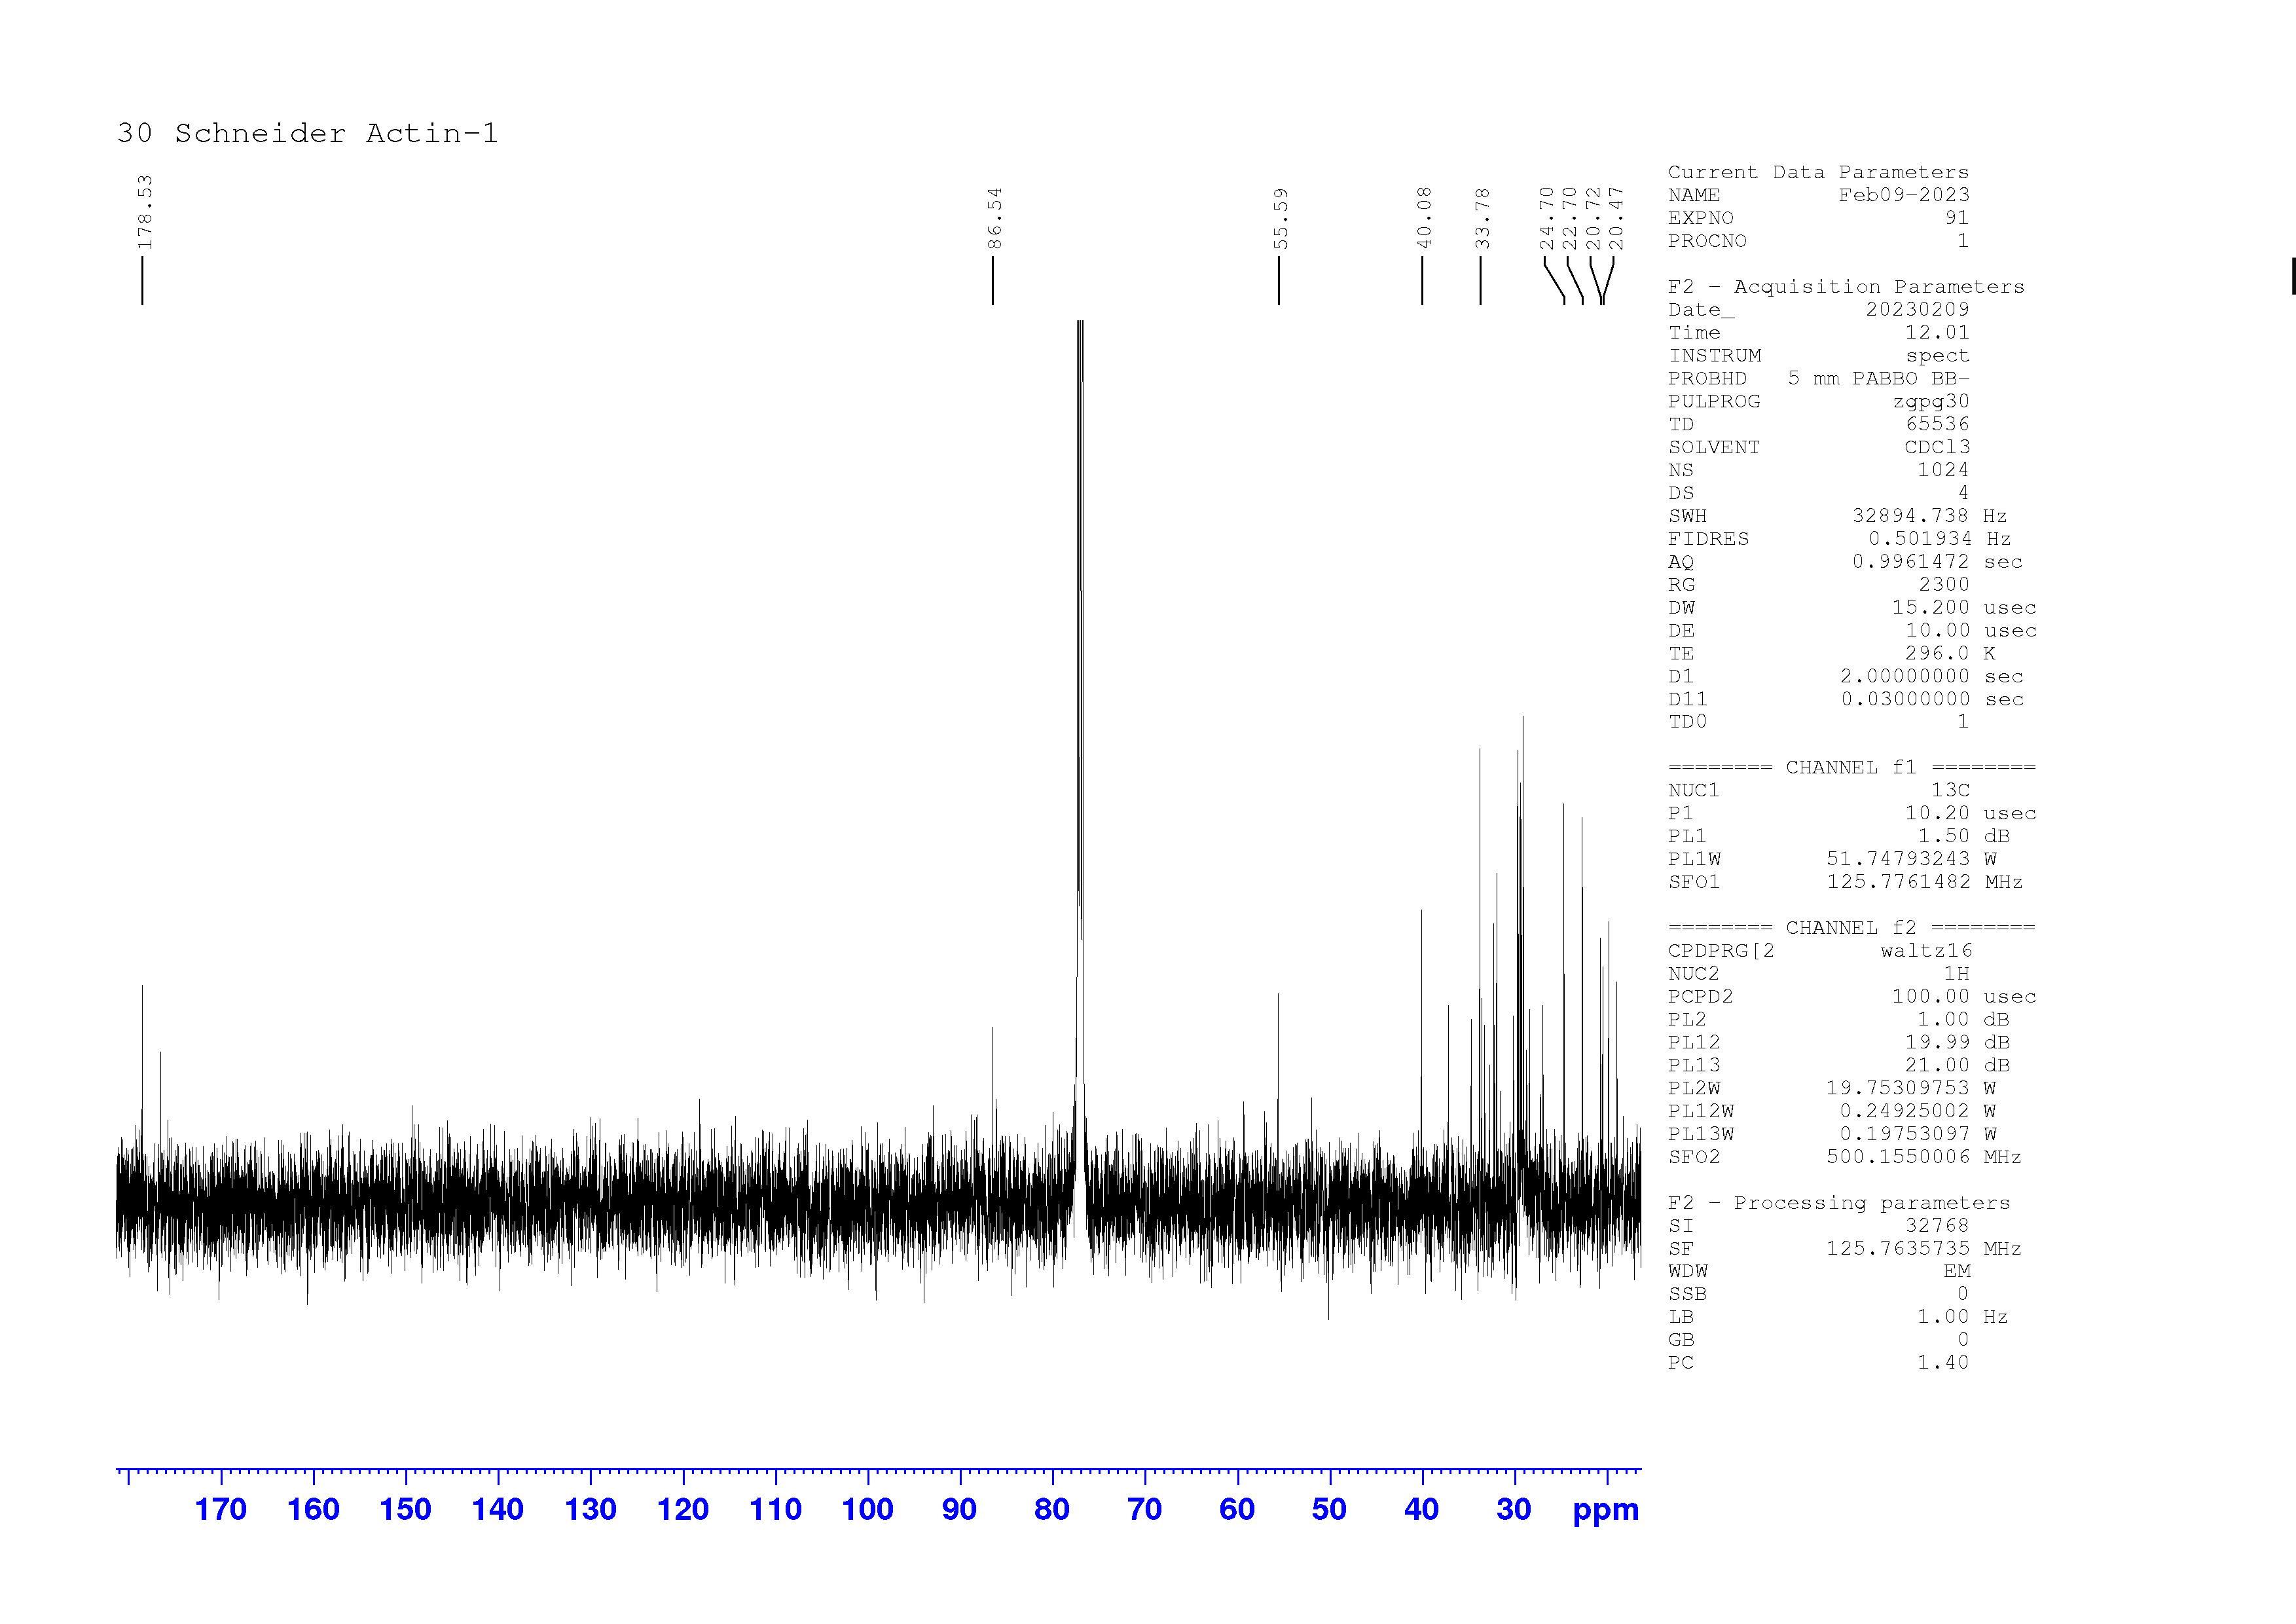


**1H of cis-tetrahydroactinidiolide (25) with equimolar mesitylene standard**


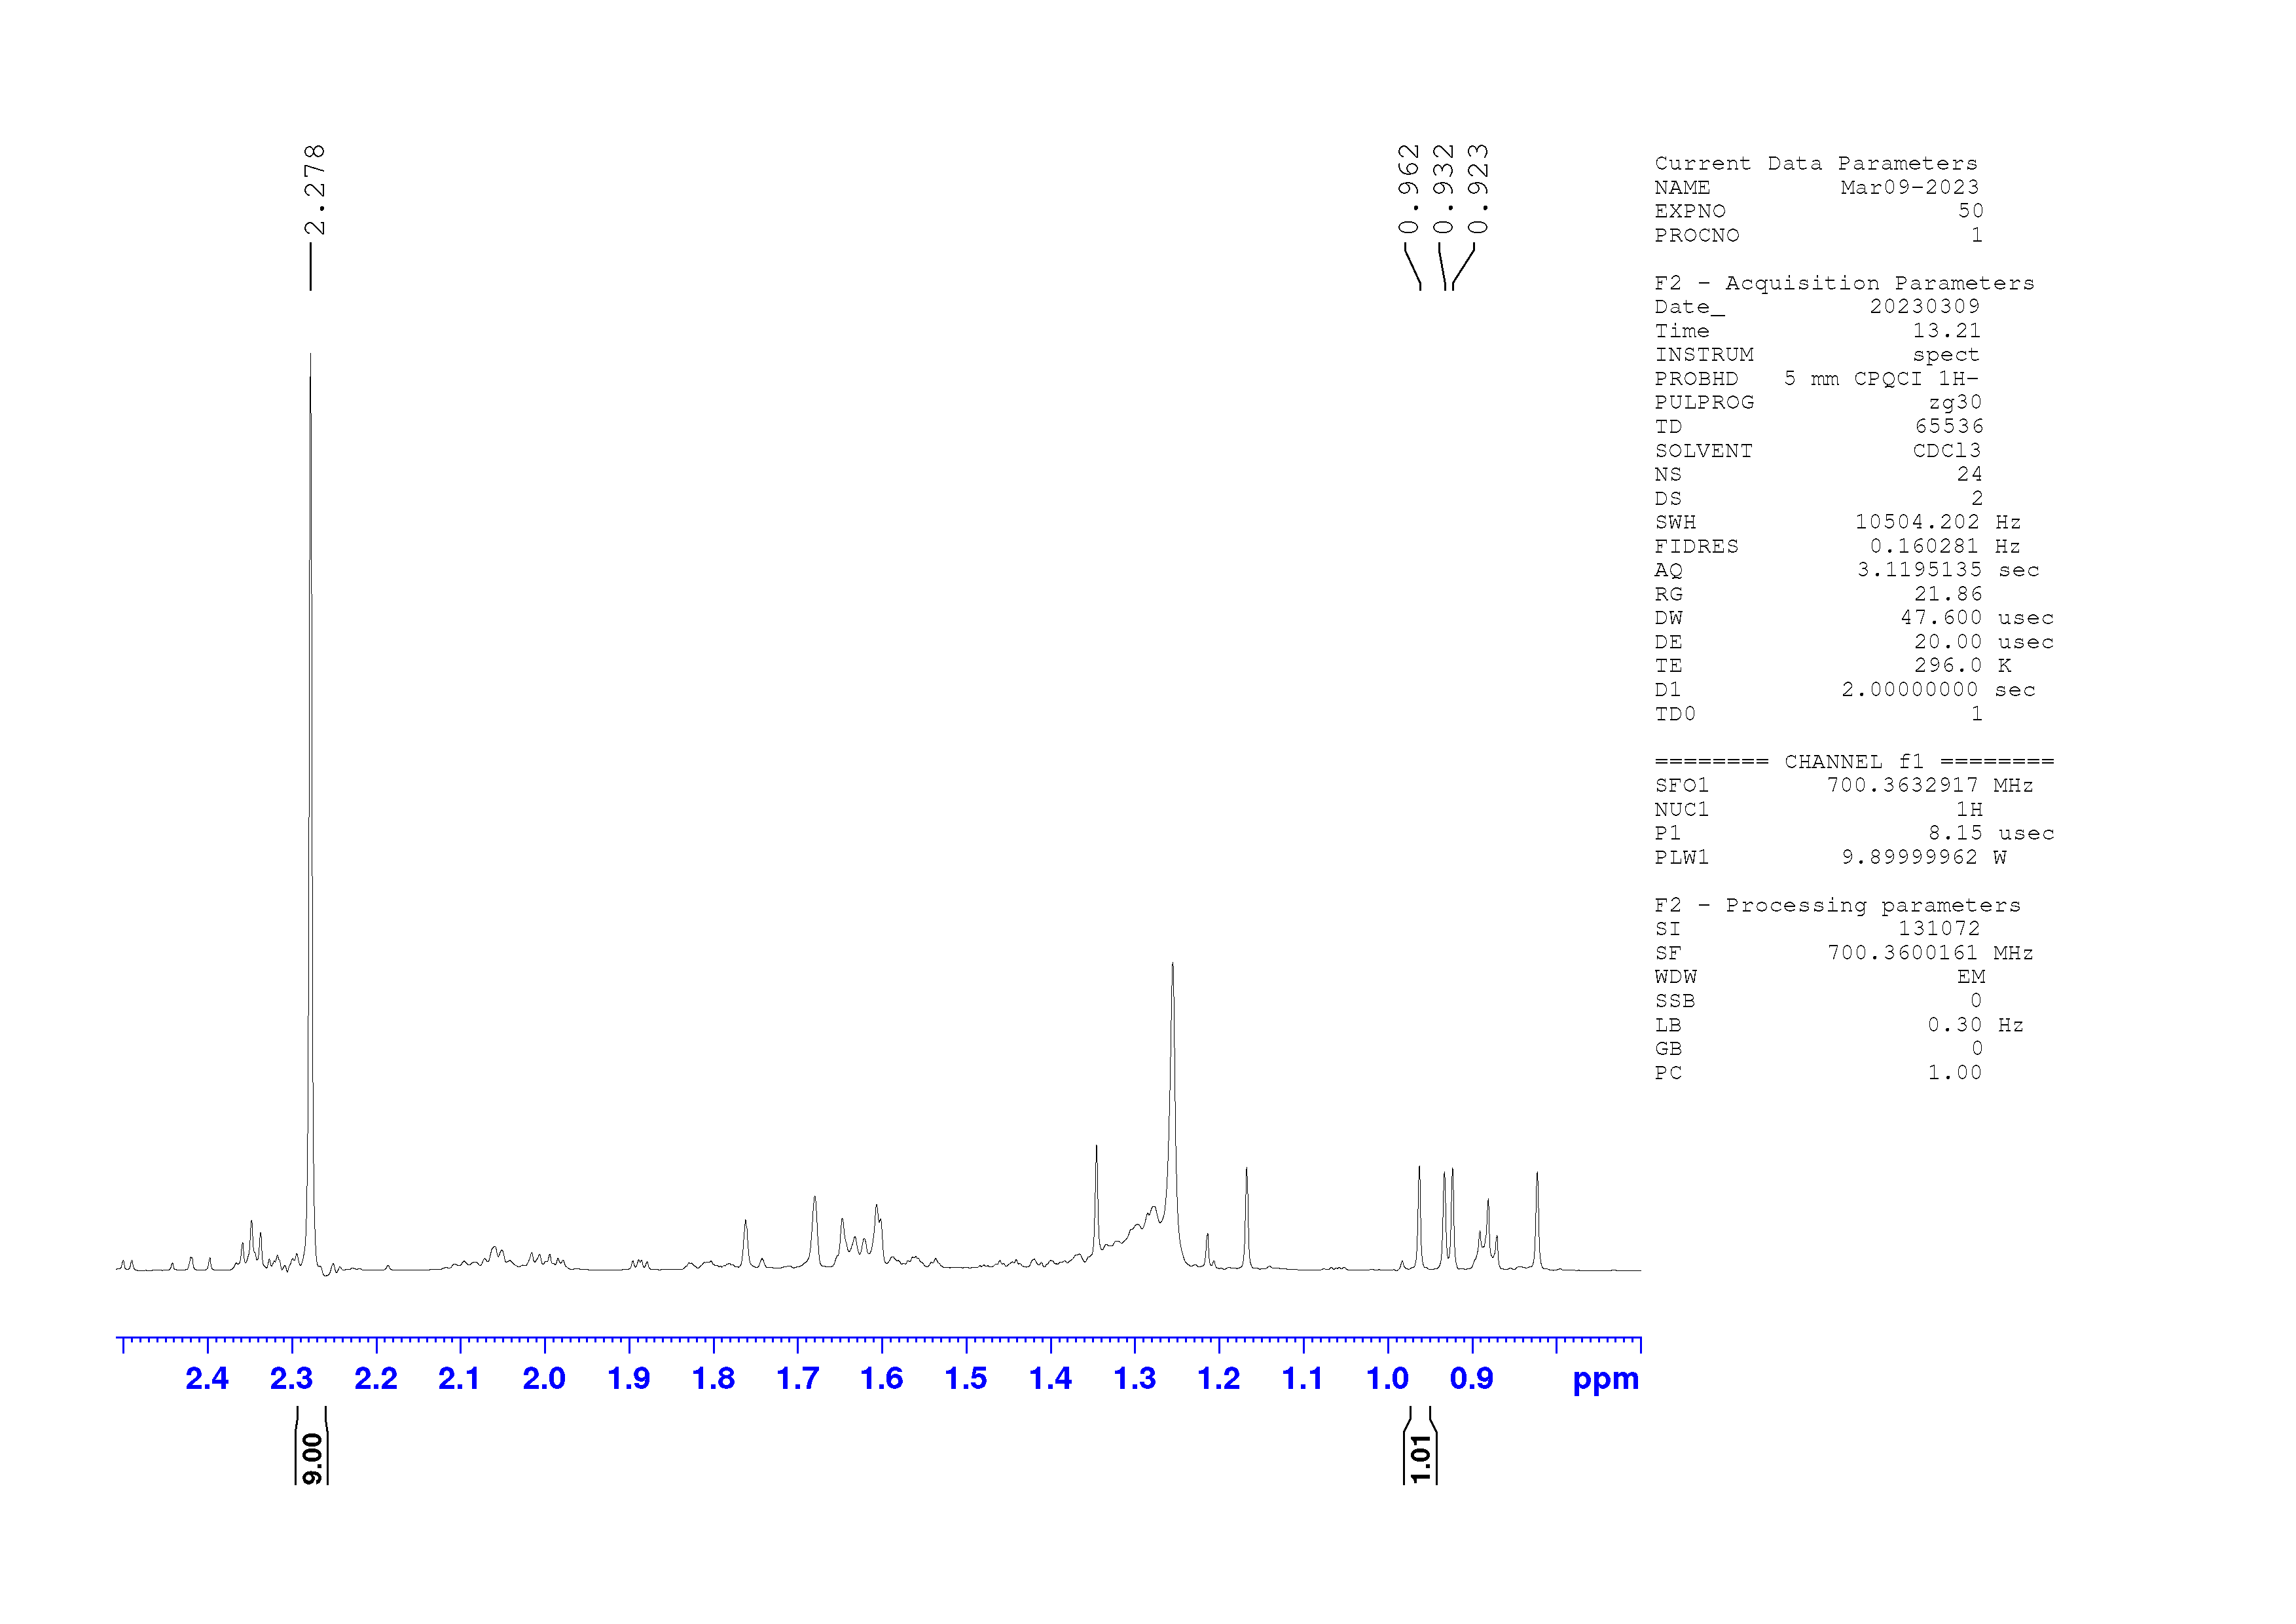


**13C of cis-tetrahydroactinidiolide (25)**


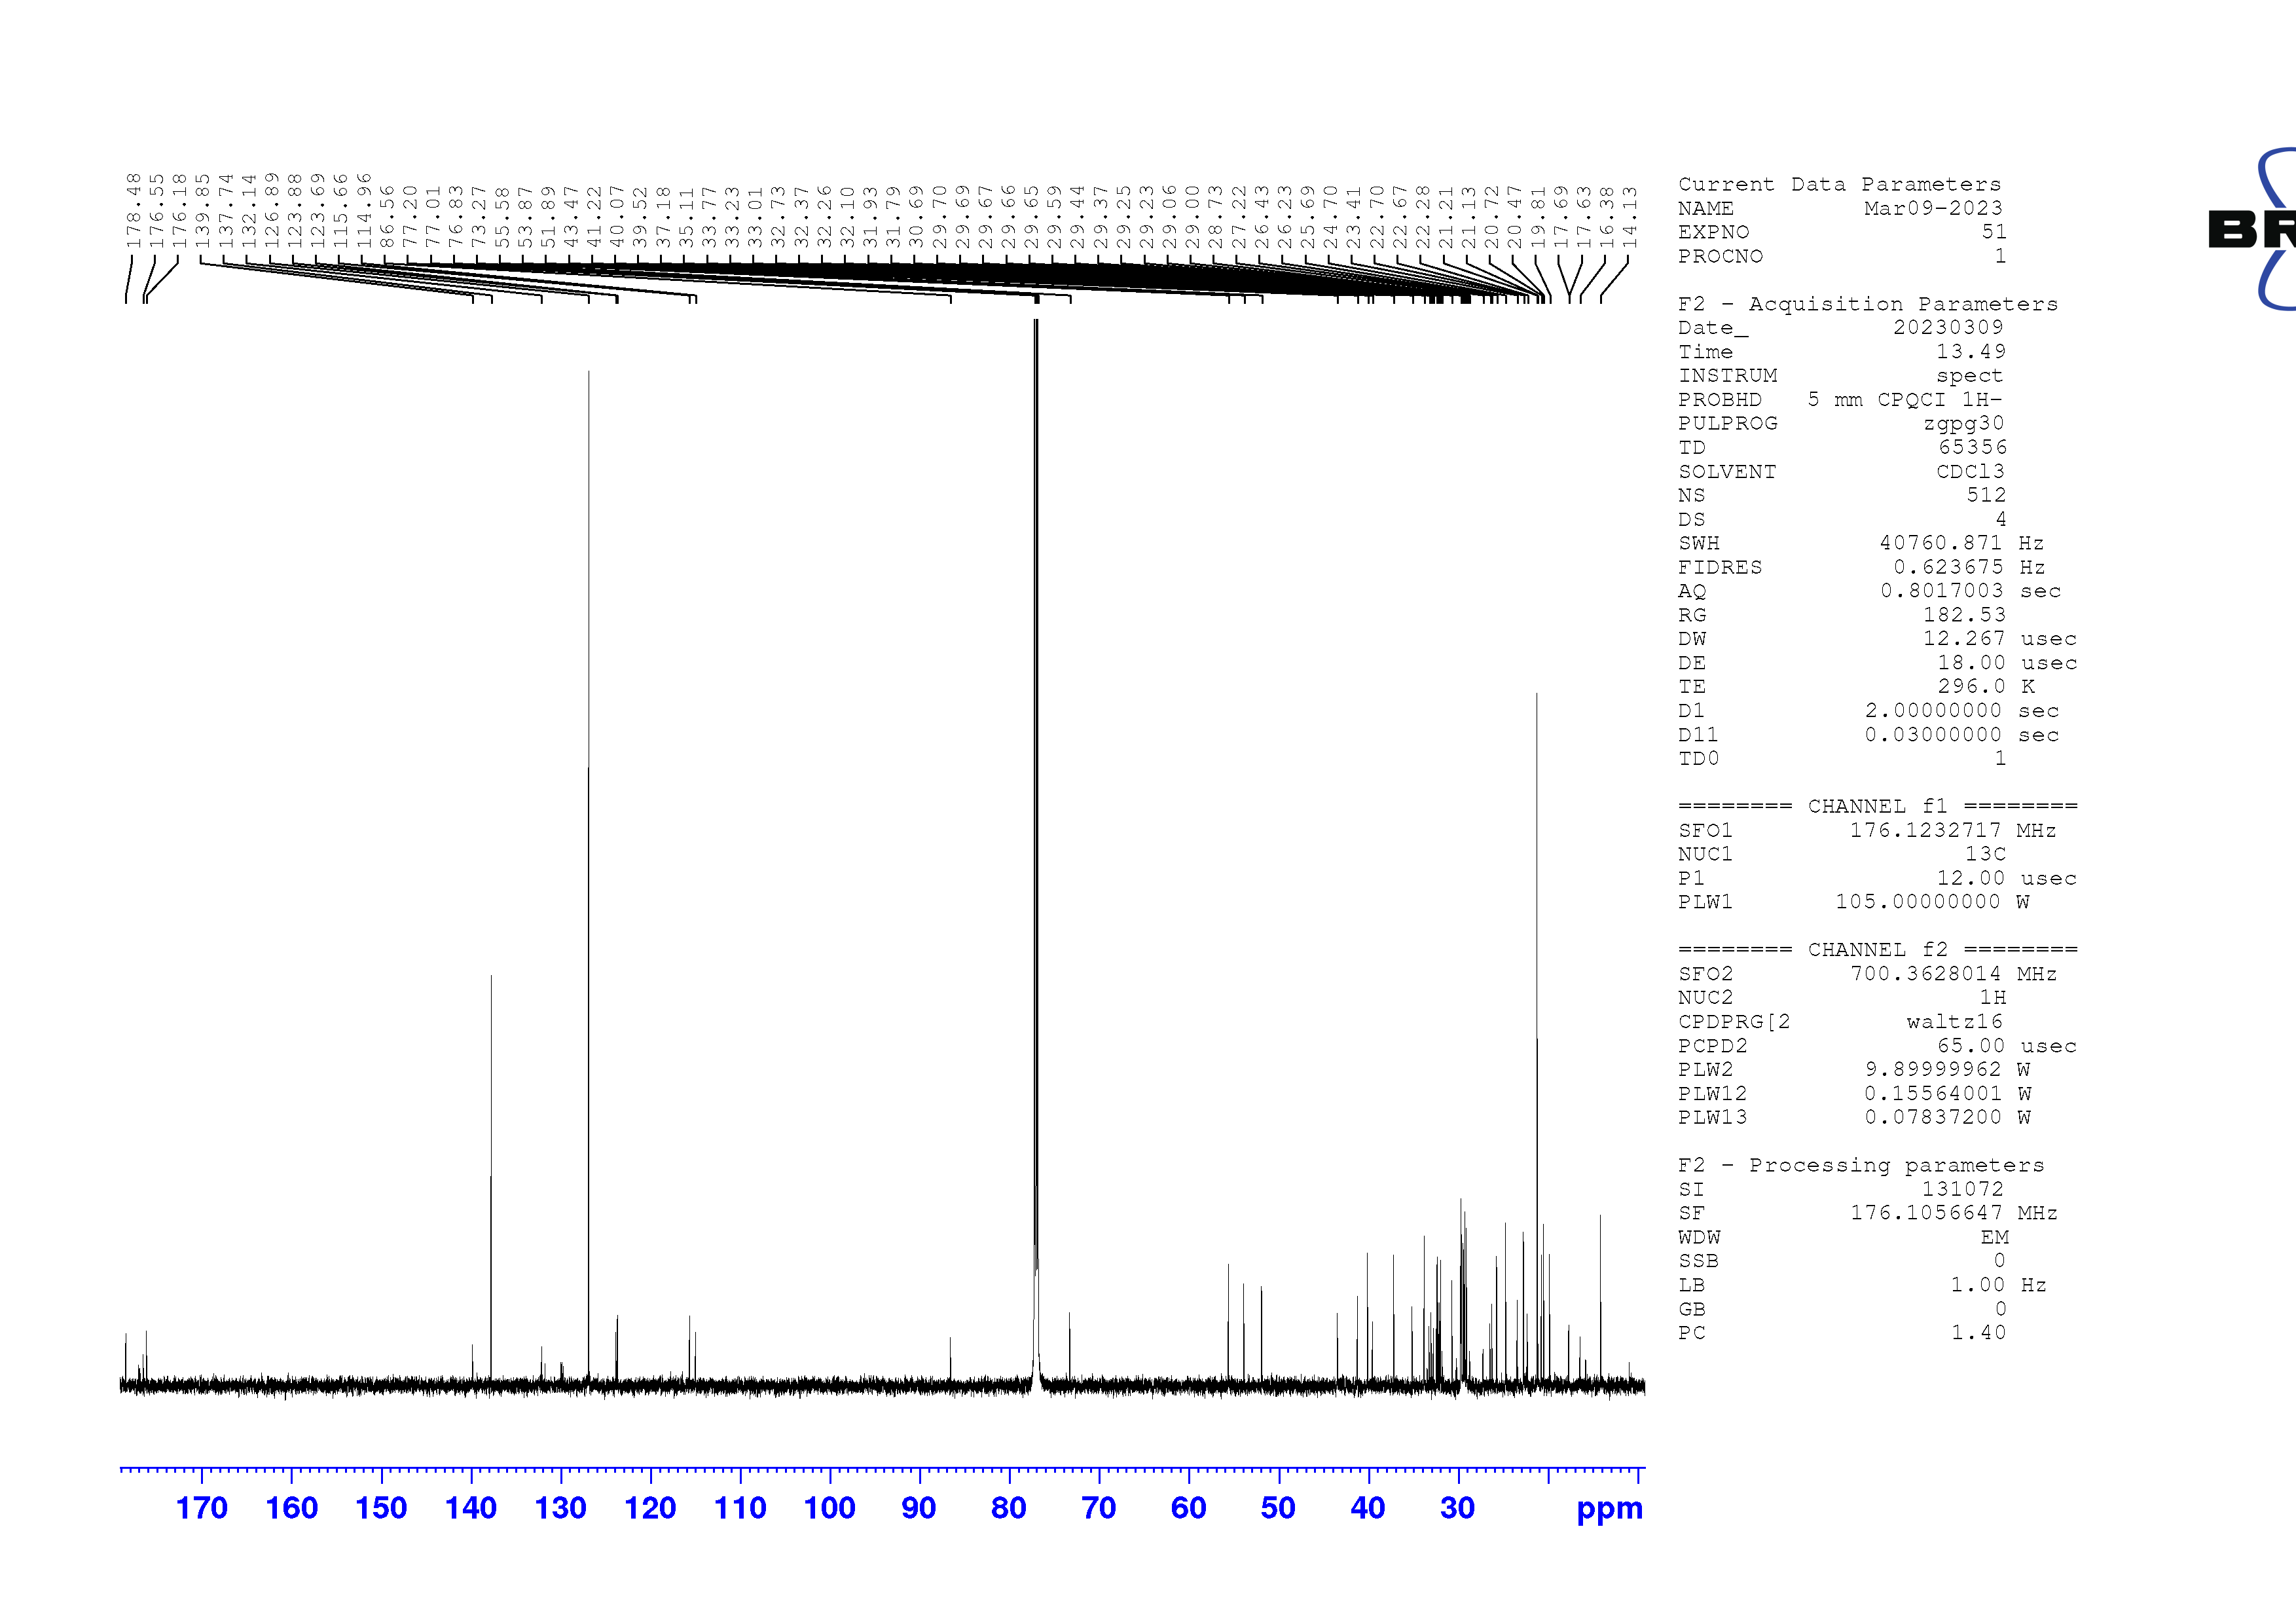


**1H of sclareolide (26), grease impurity**


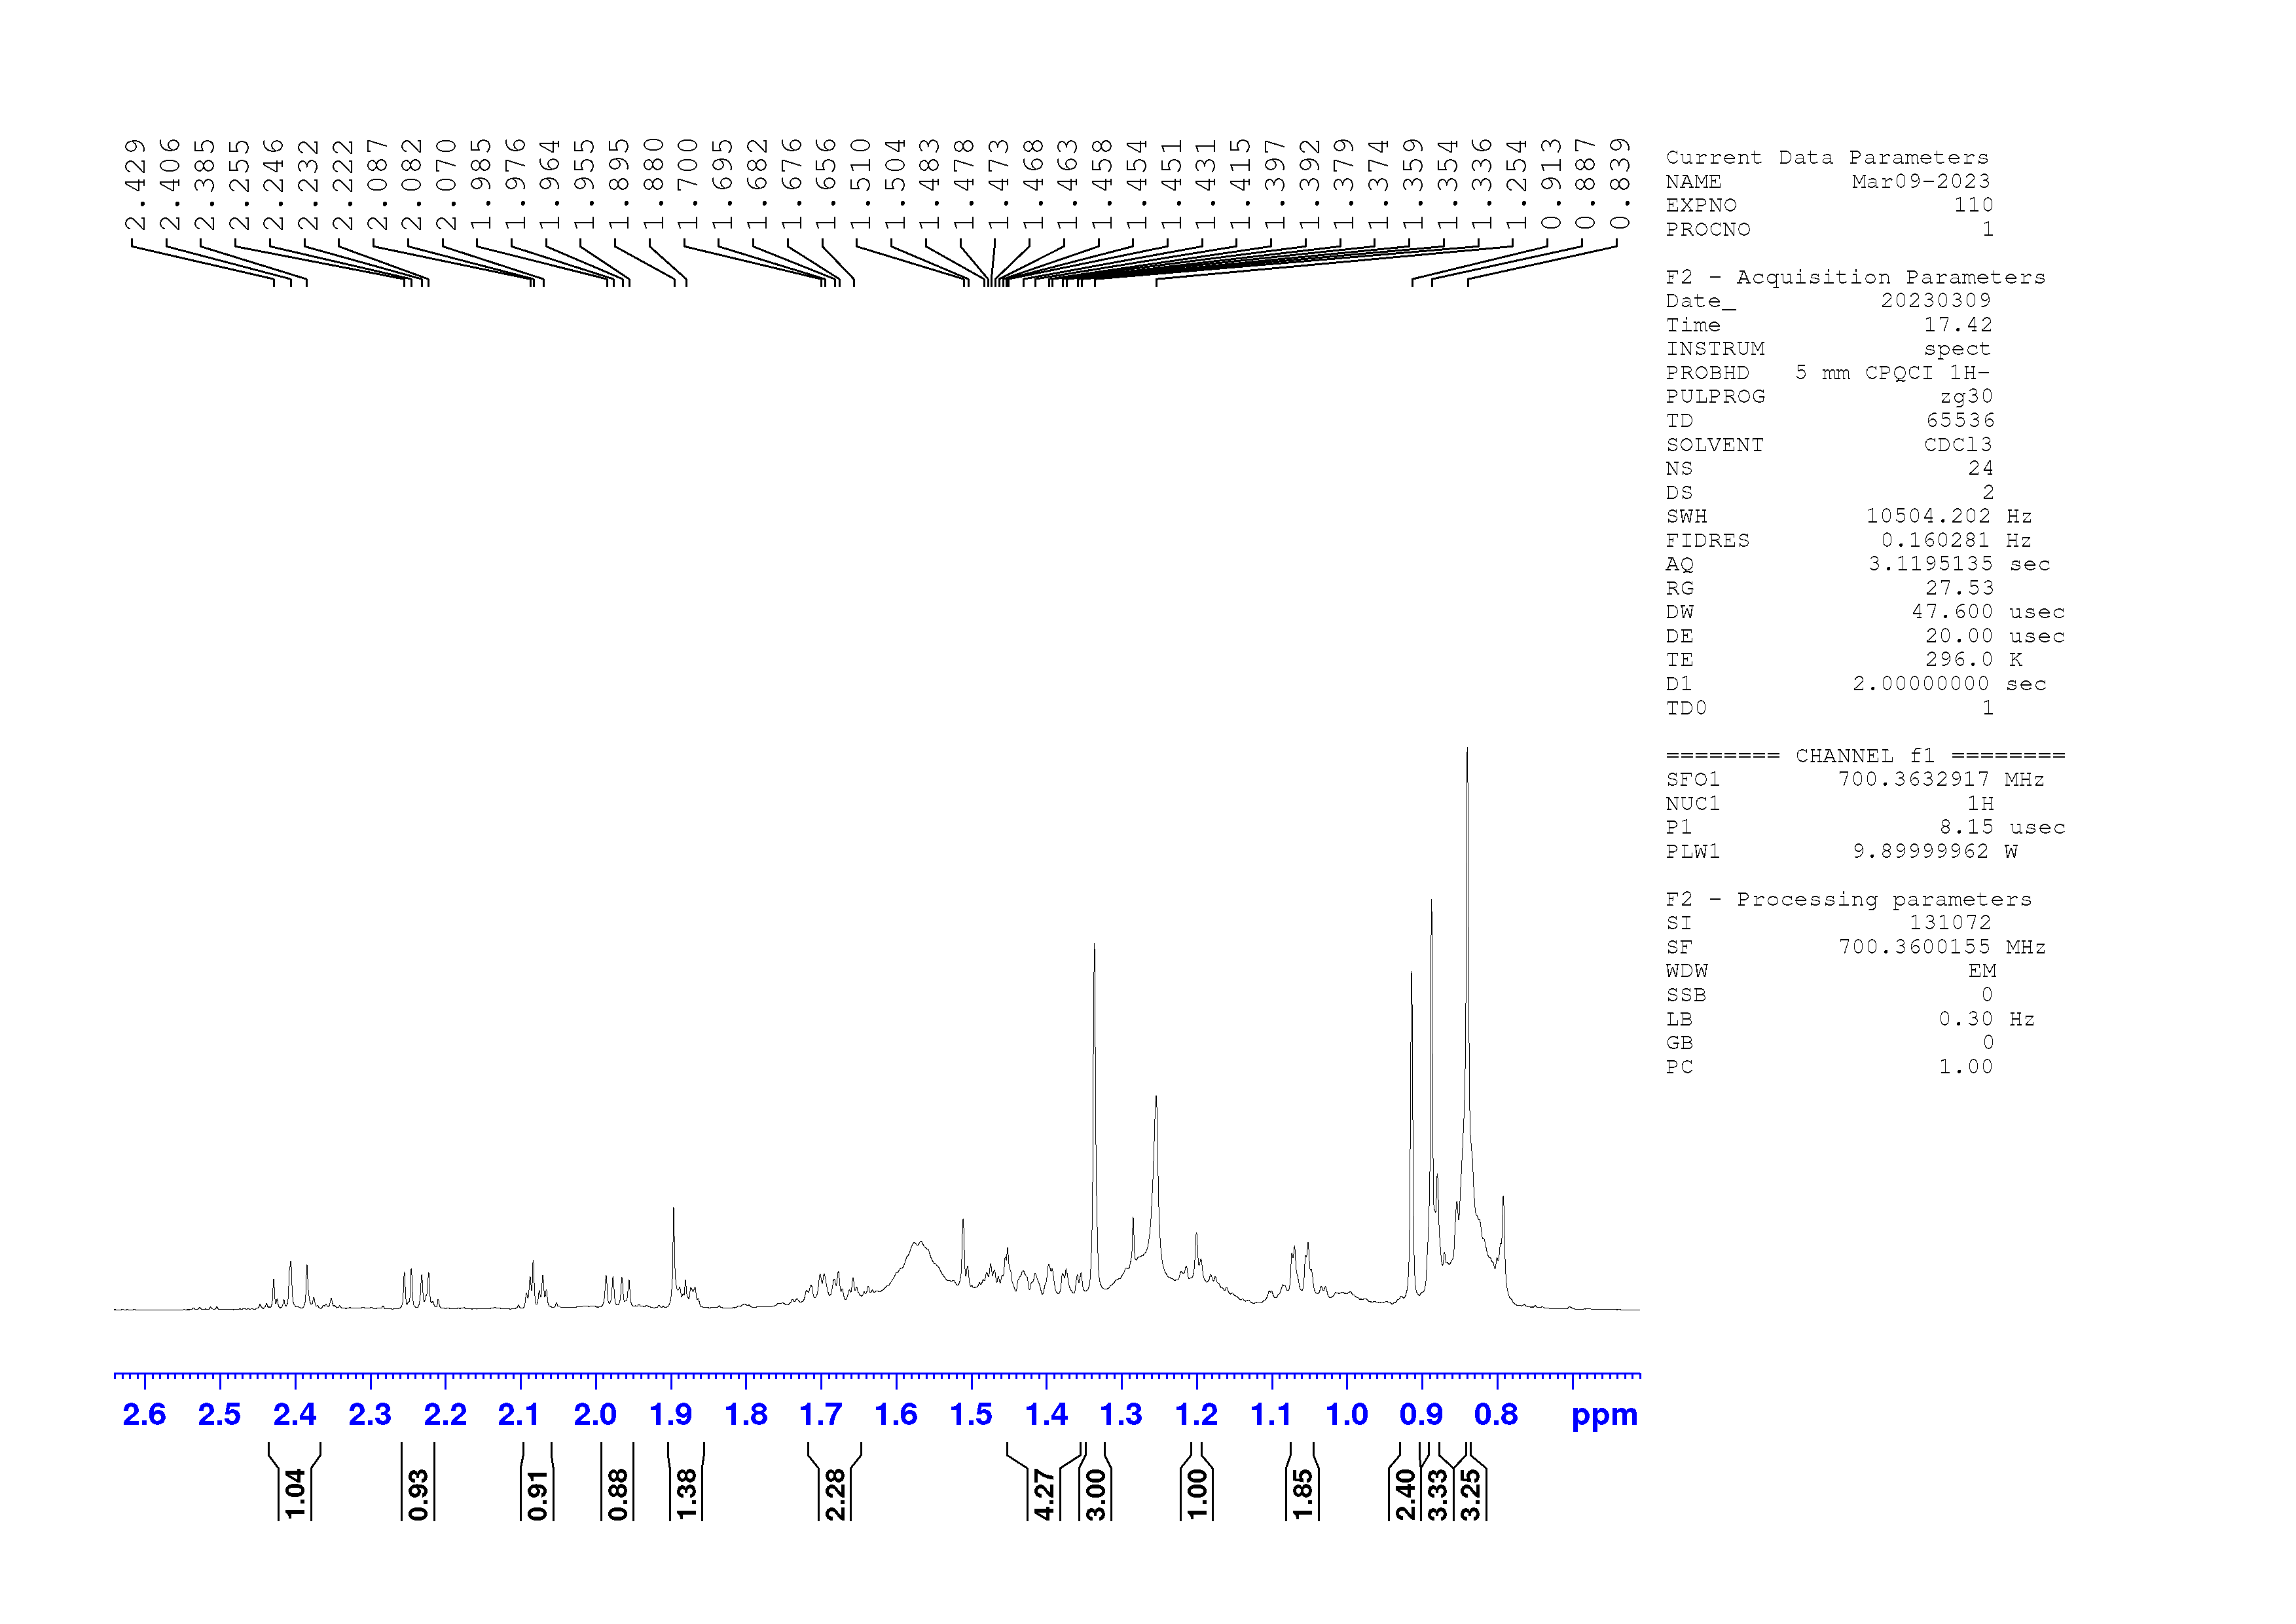


**13C of sclareolide (26), grease impurity**


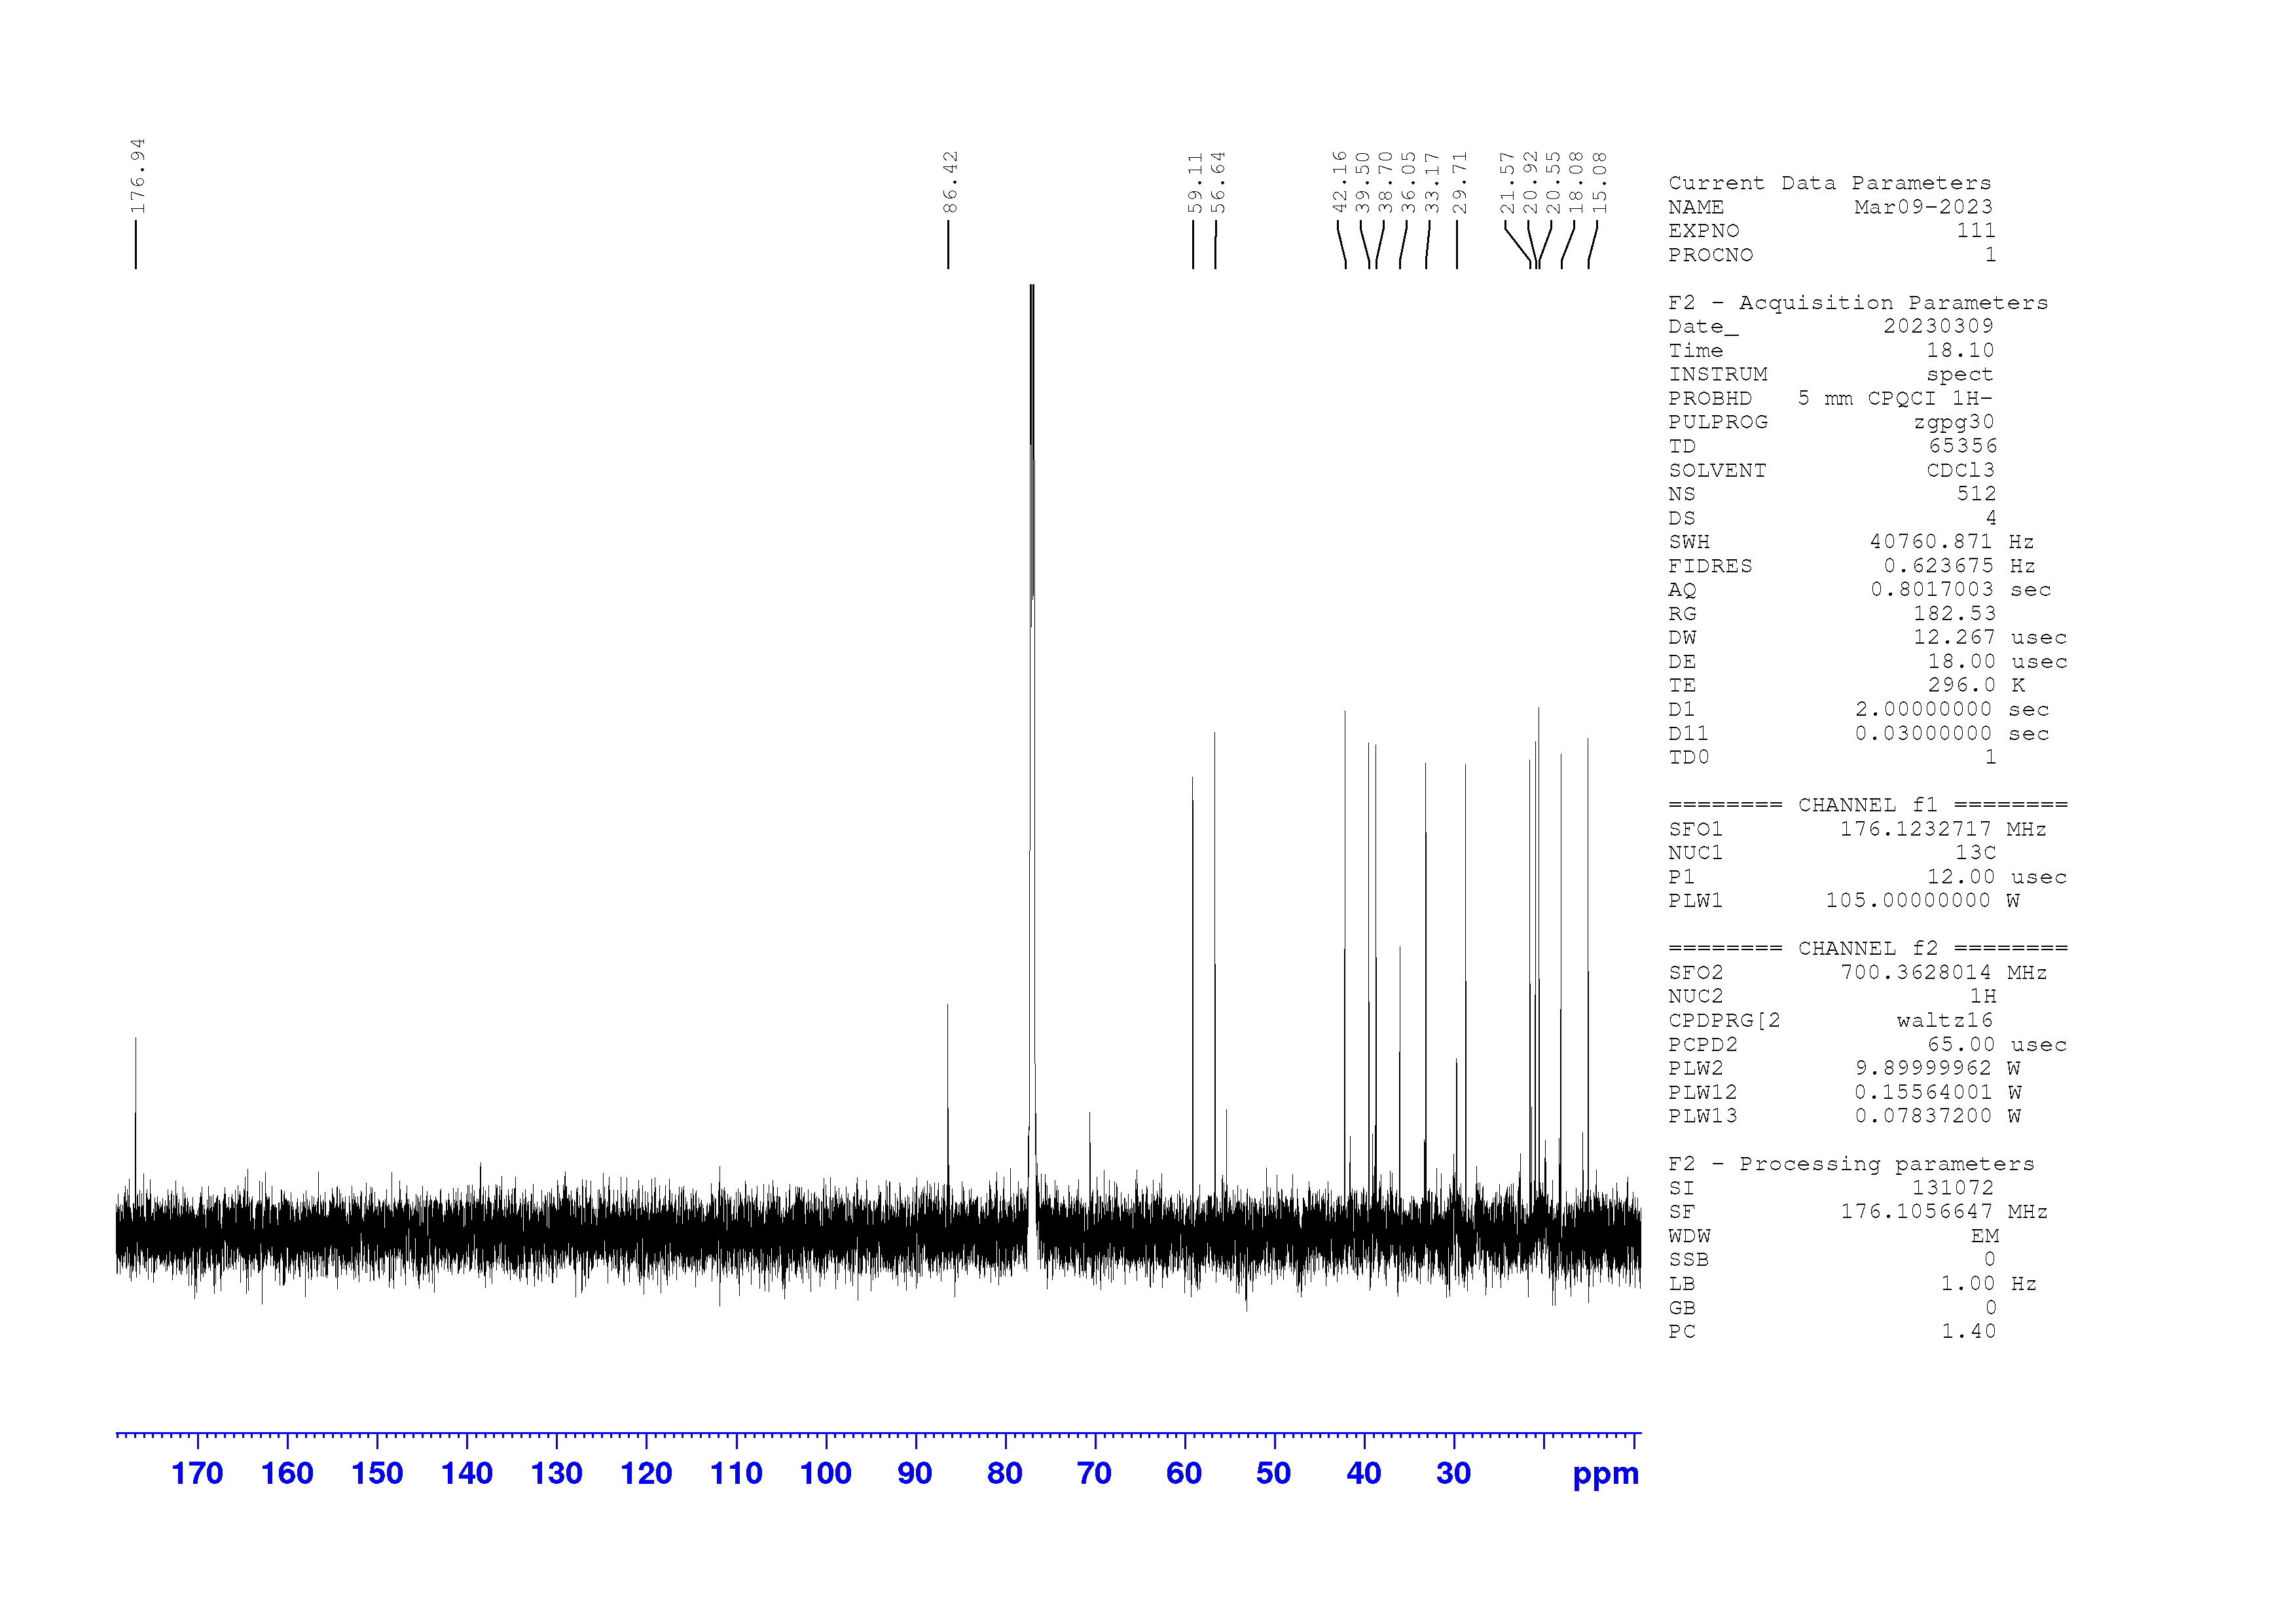


**1H of chromanone (3)**


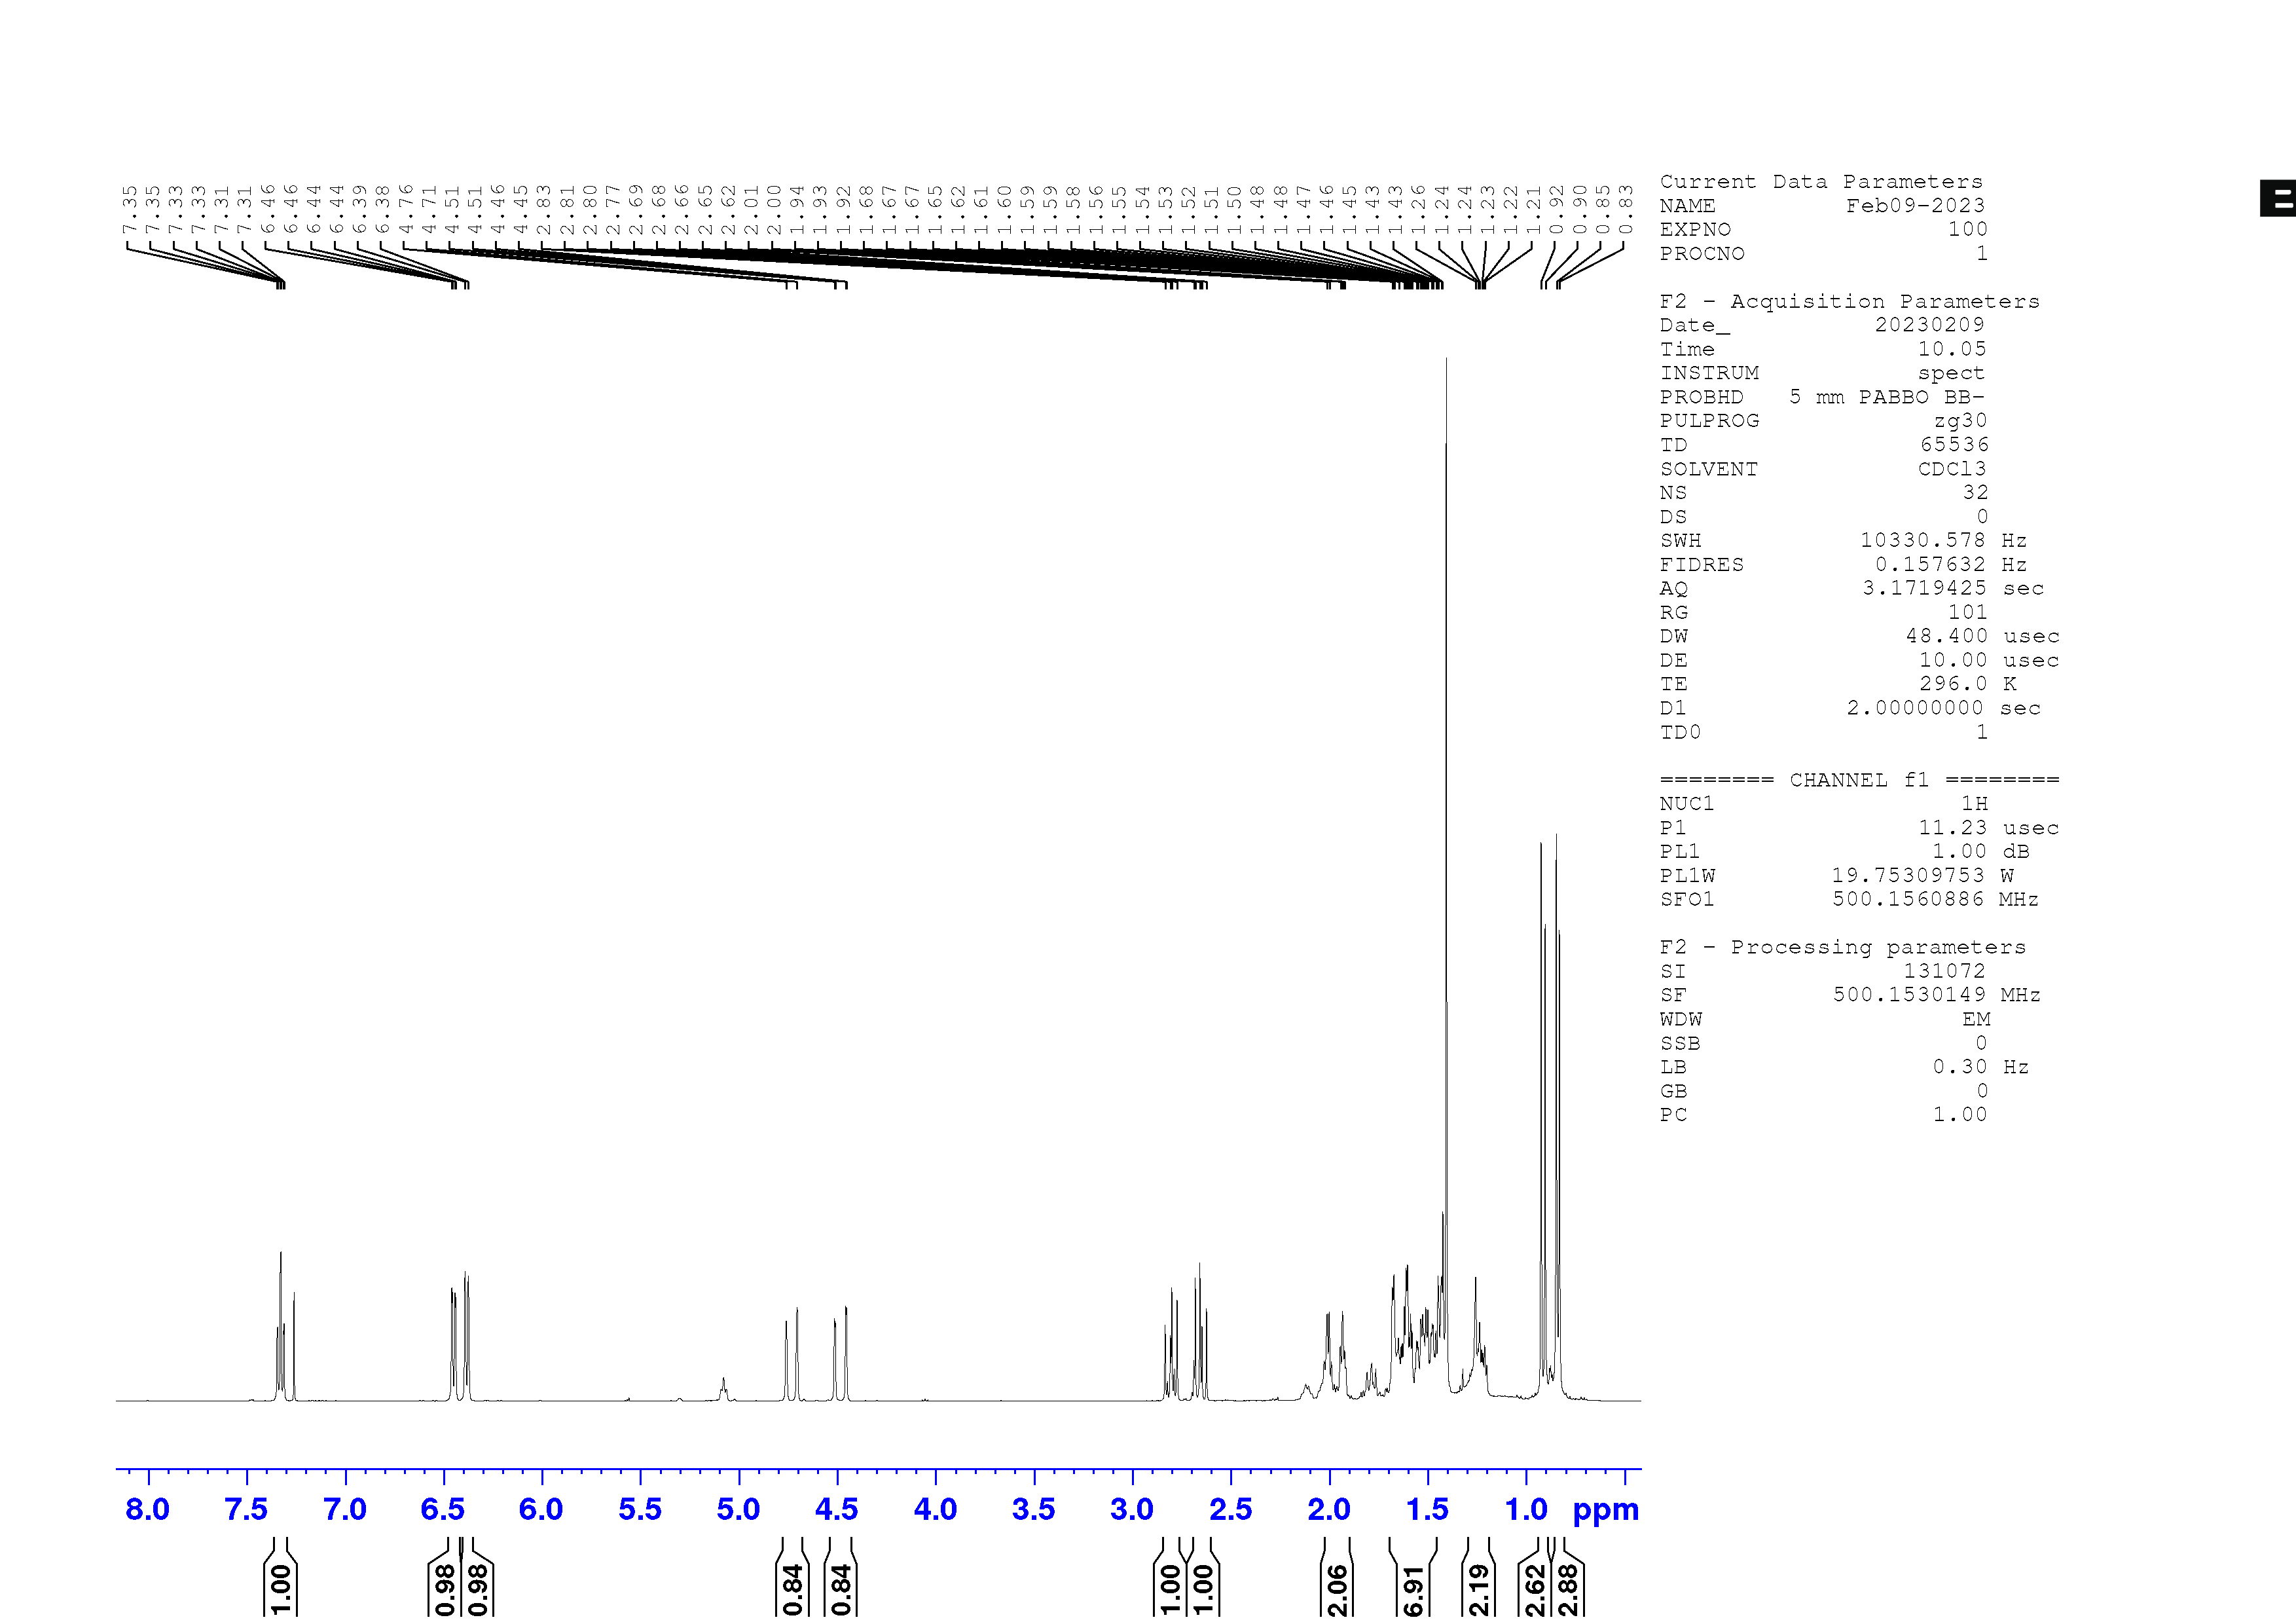


**13C of chromanone (3)**


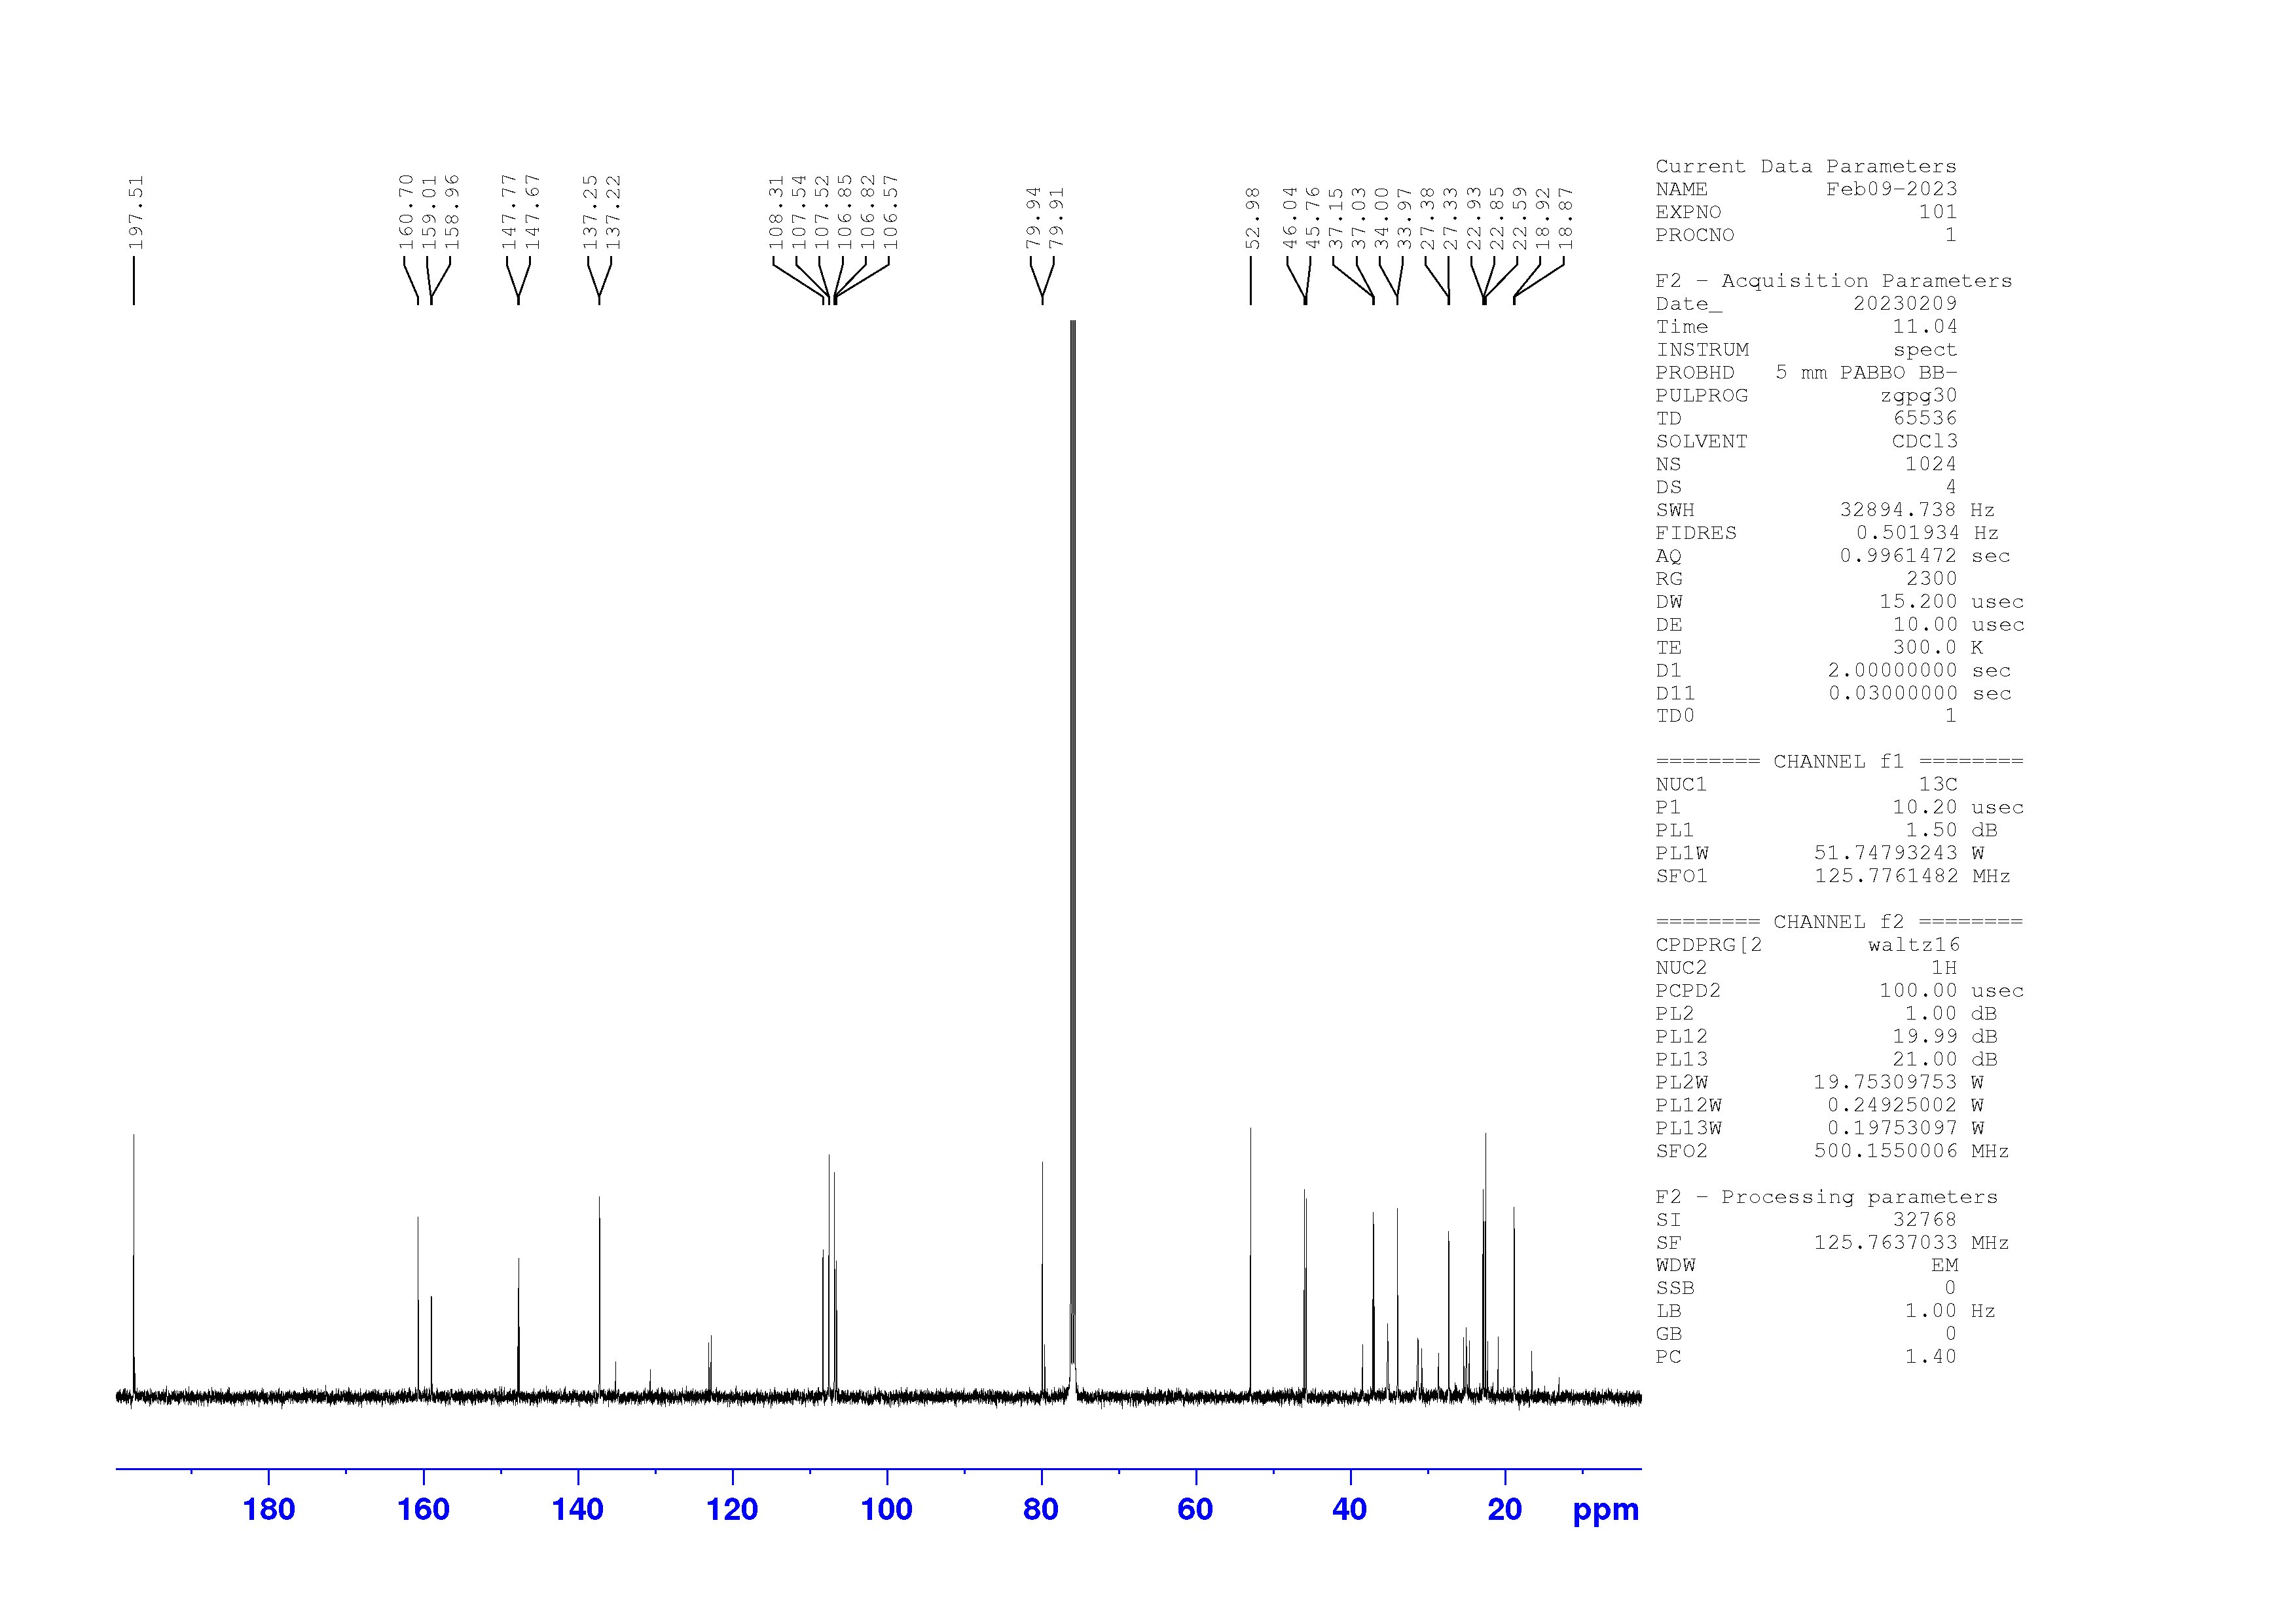


**1H of dioxanone (2) with drimenol acetate (S1-2) 1:1**


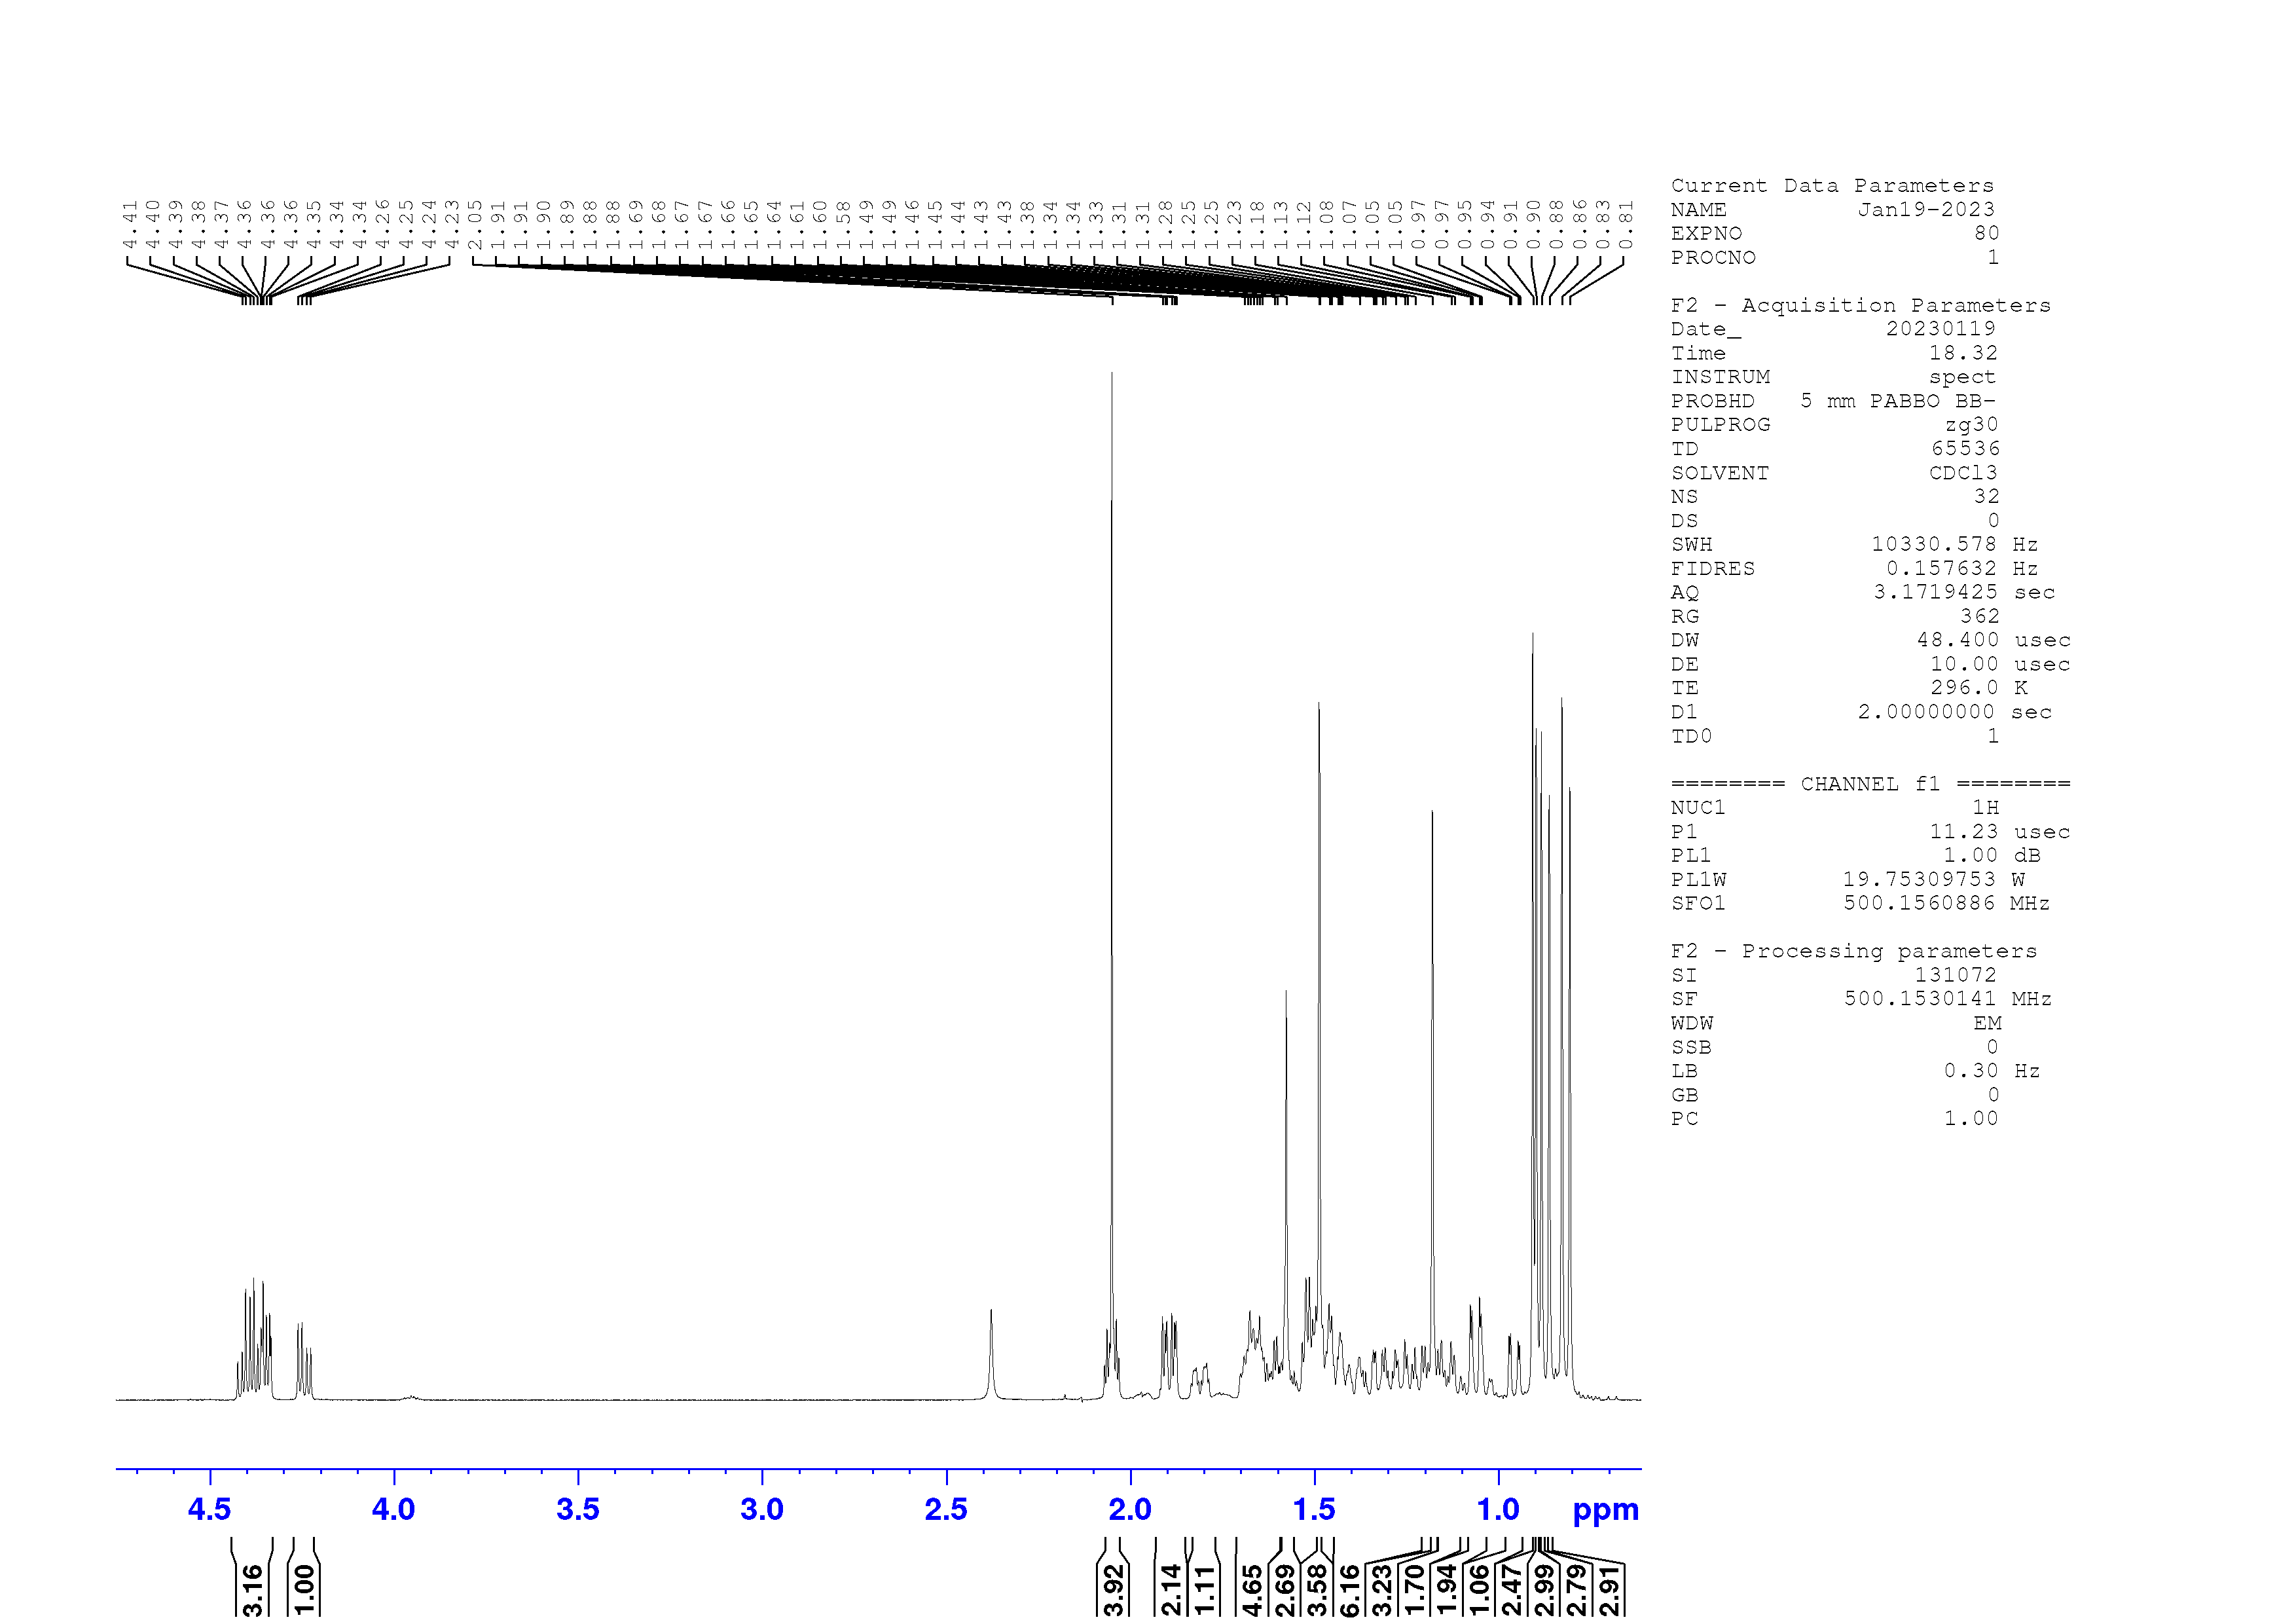


**13C of dioxanone (2) with drimenol acetate (S1-2) 1:1**


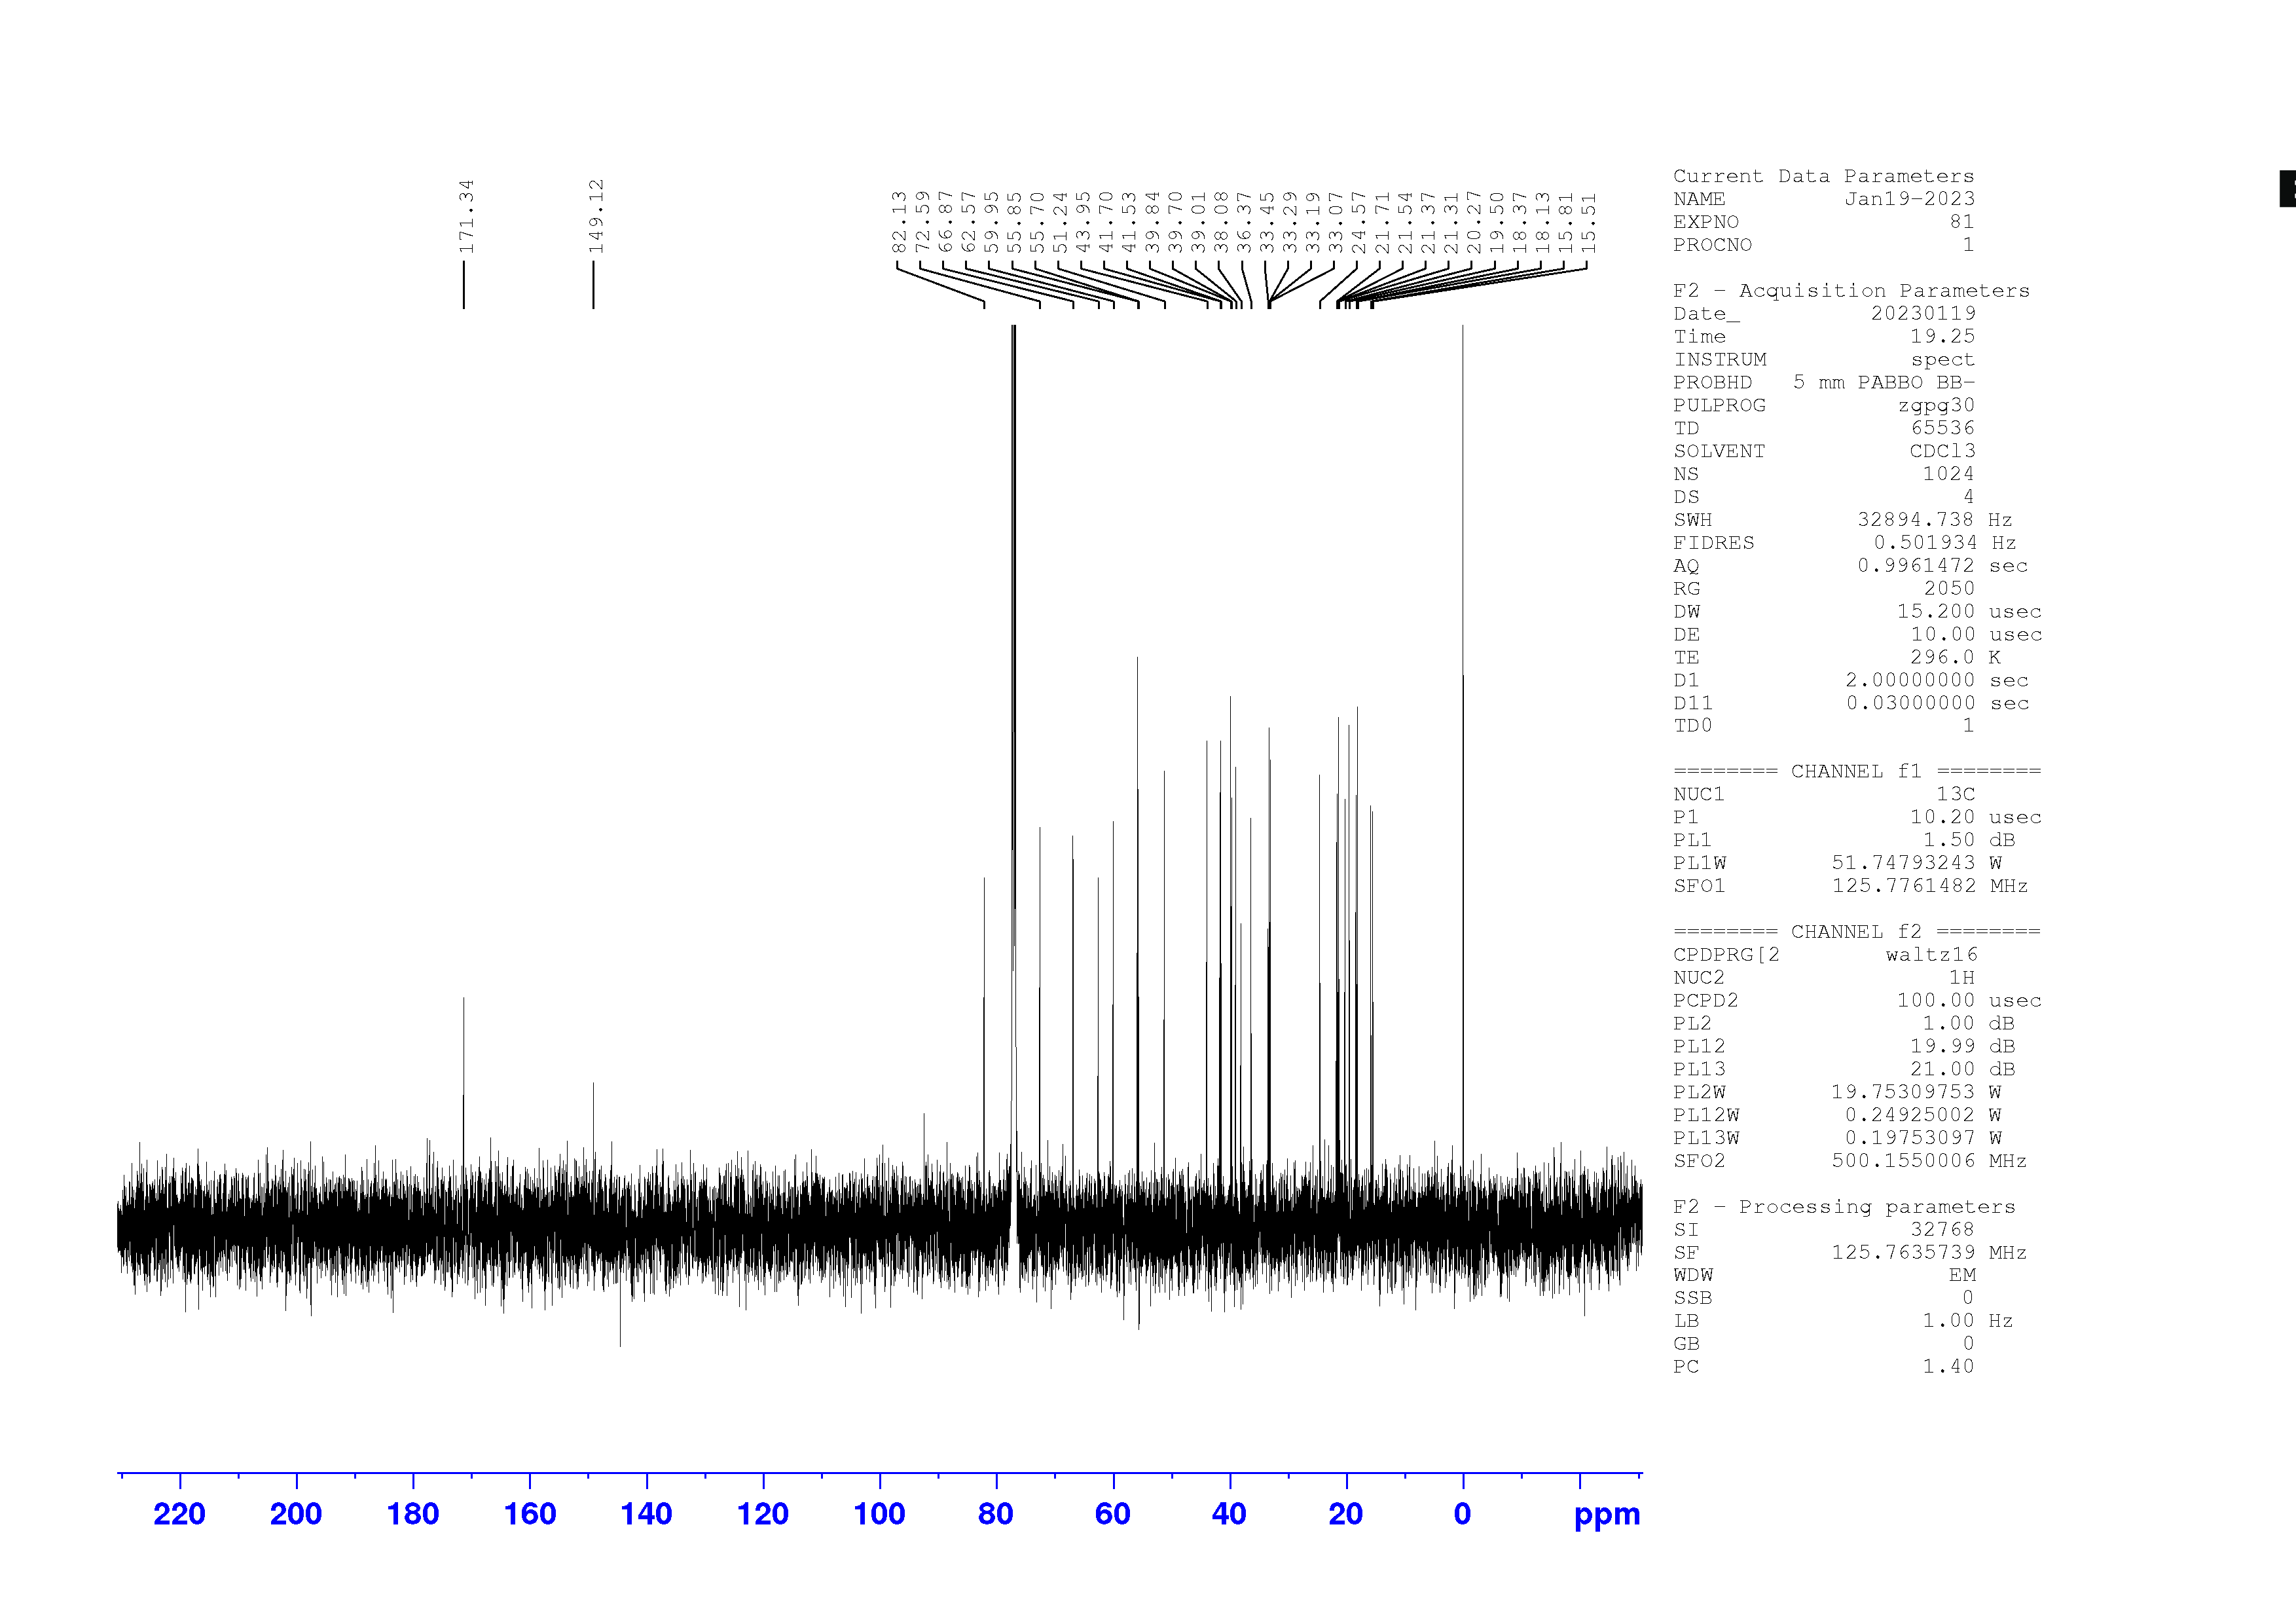


**1H of drimenol acetate (S1-2)**


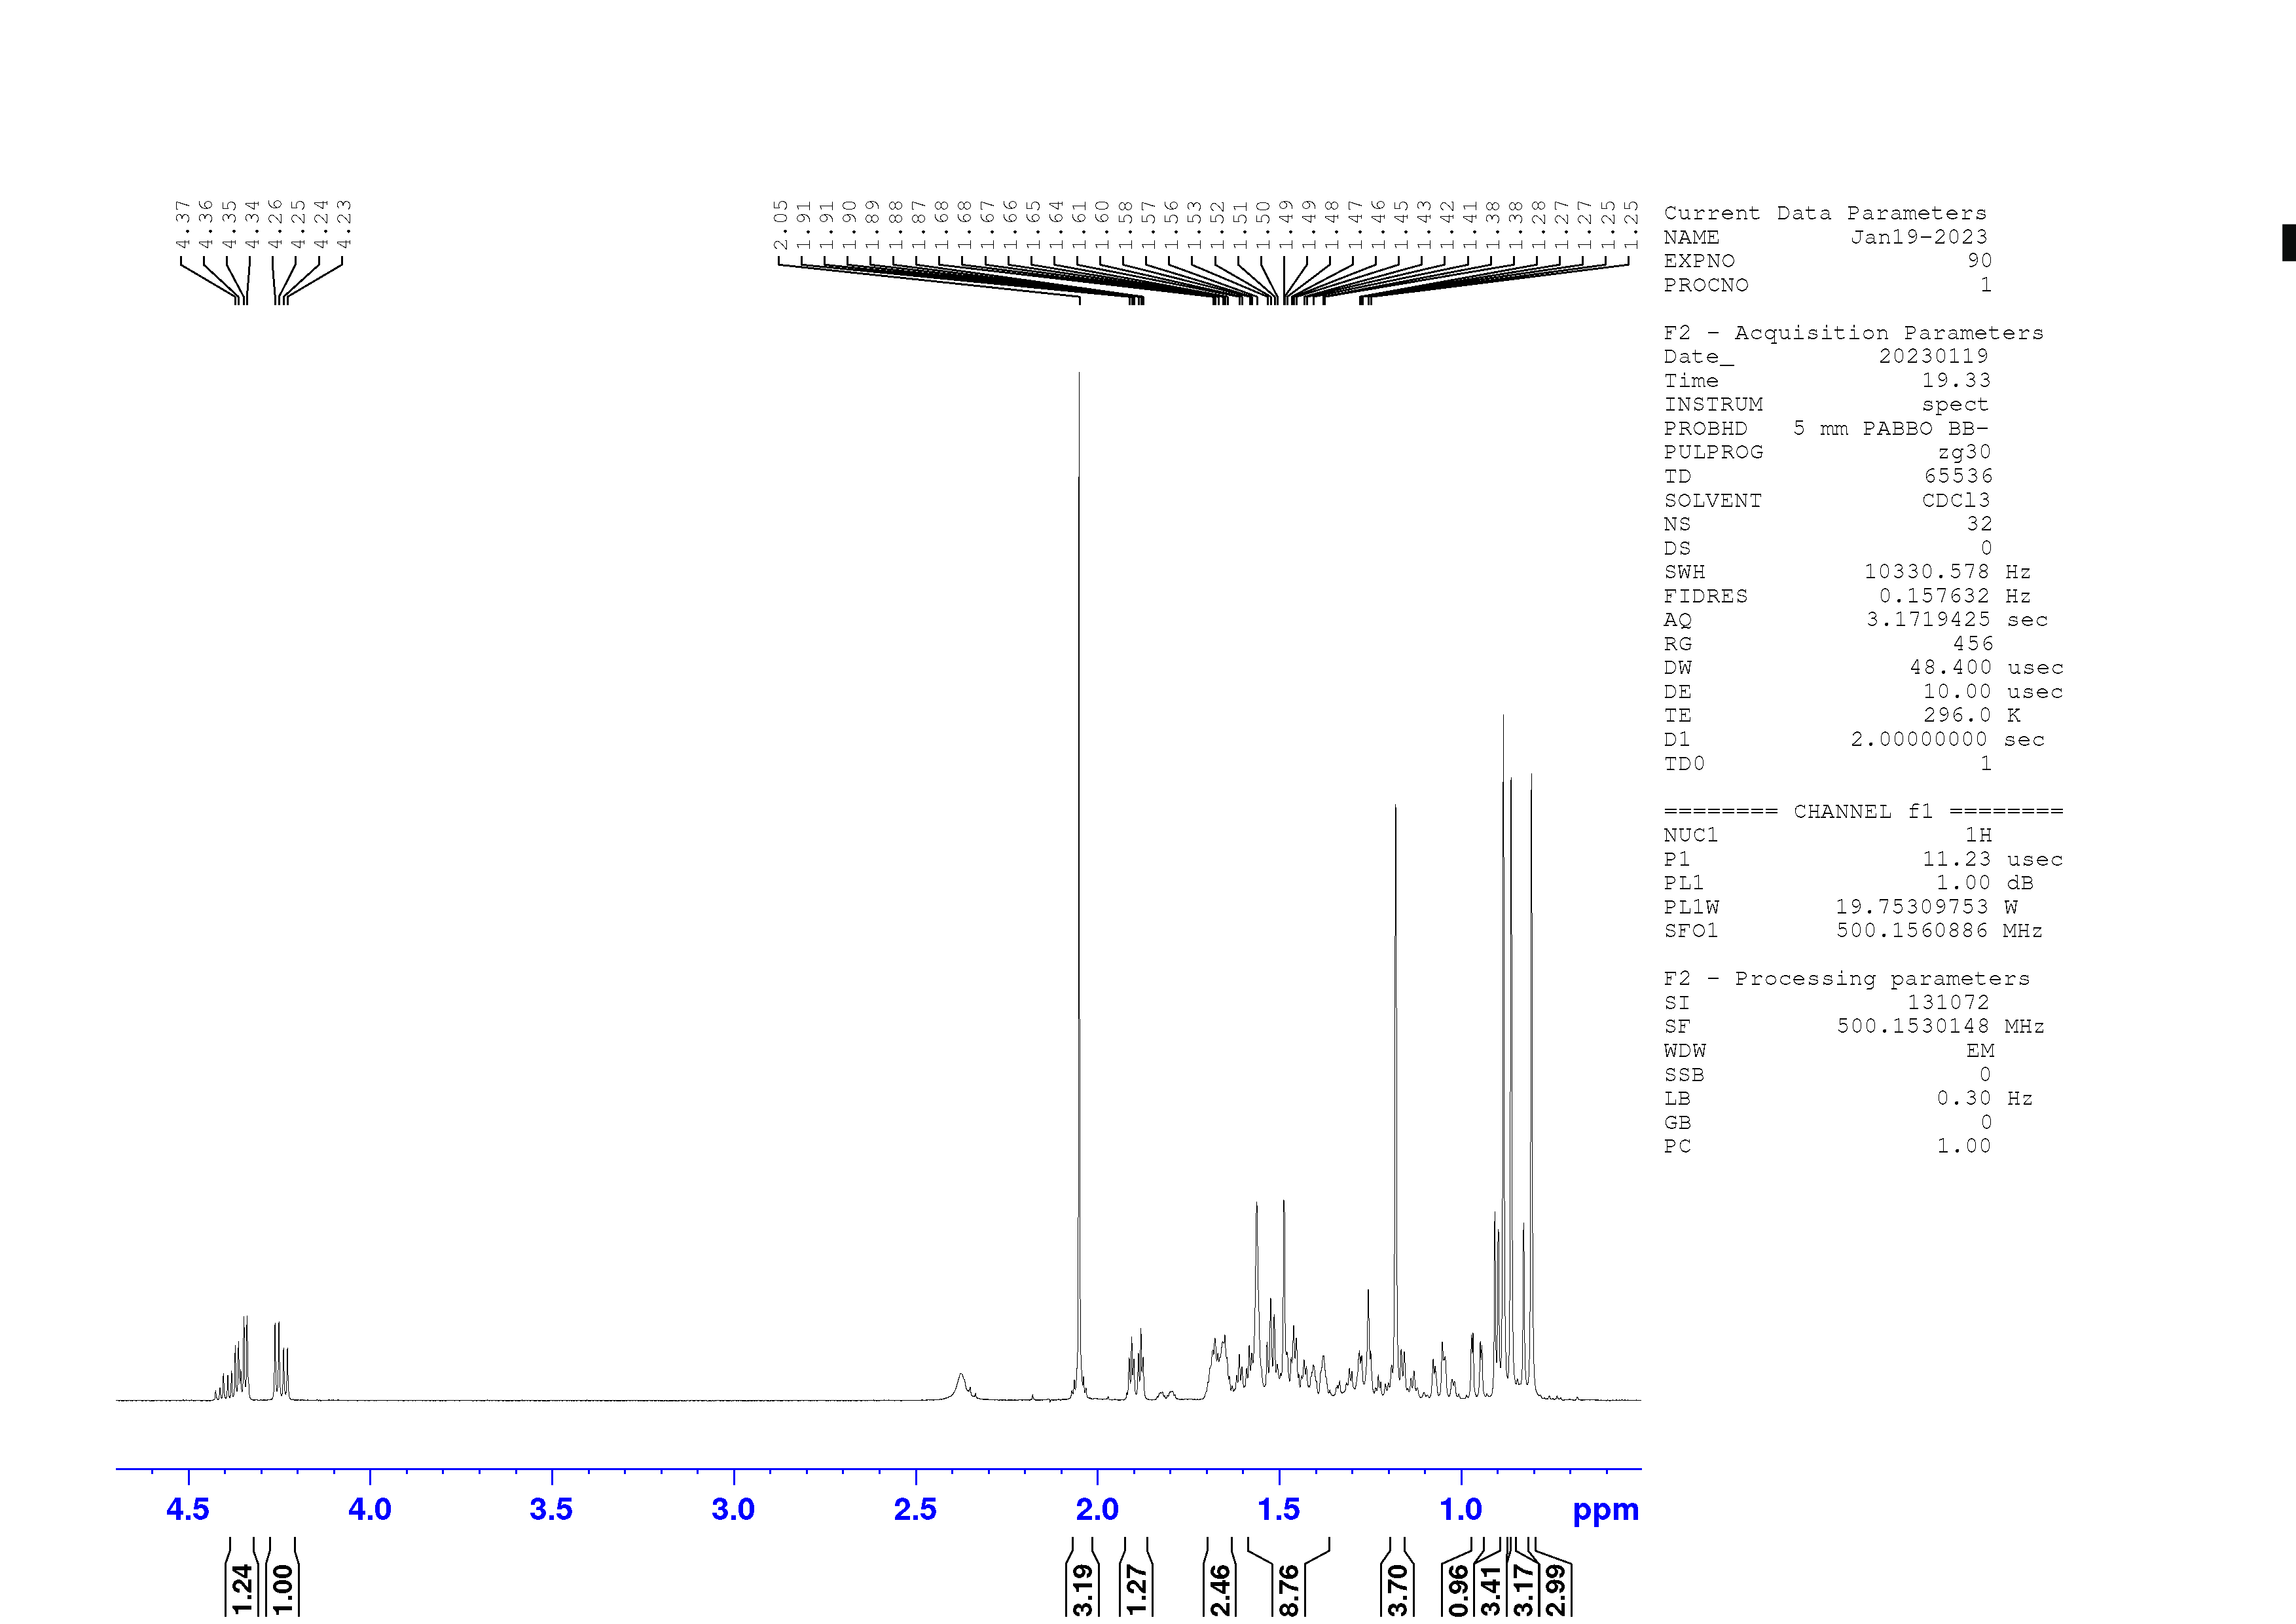


**13C of drimenol acetate (S1-2)**


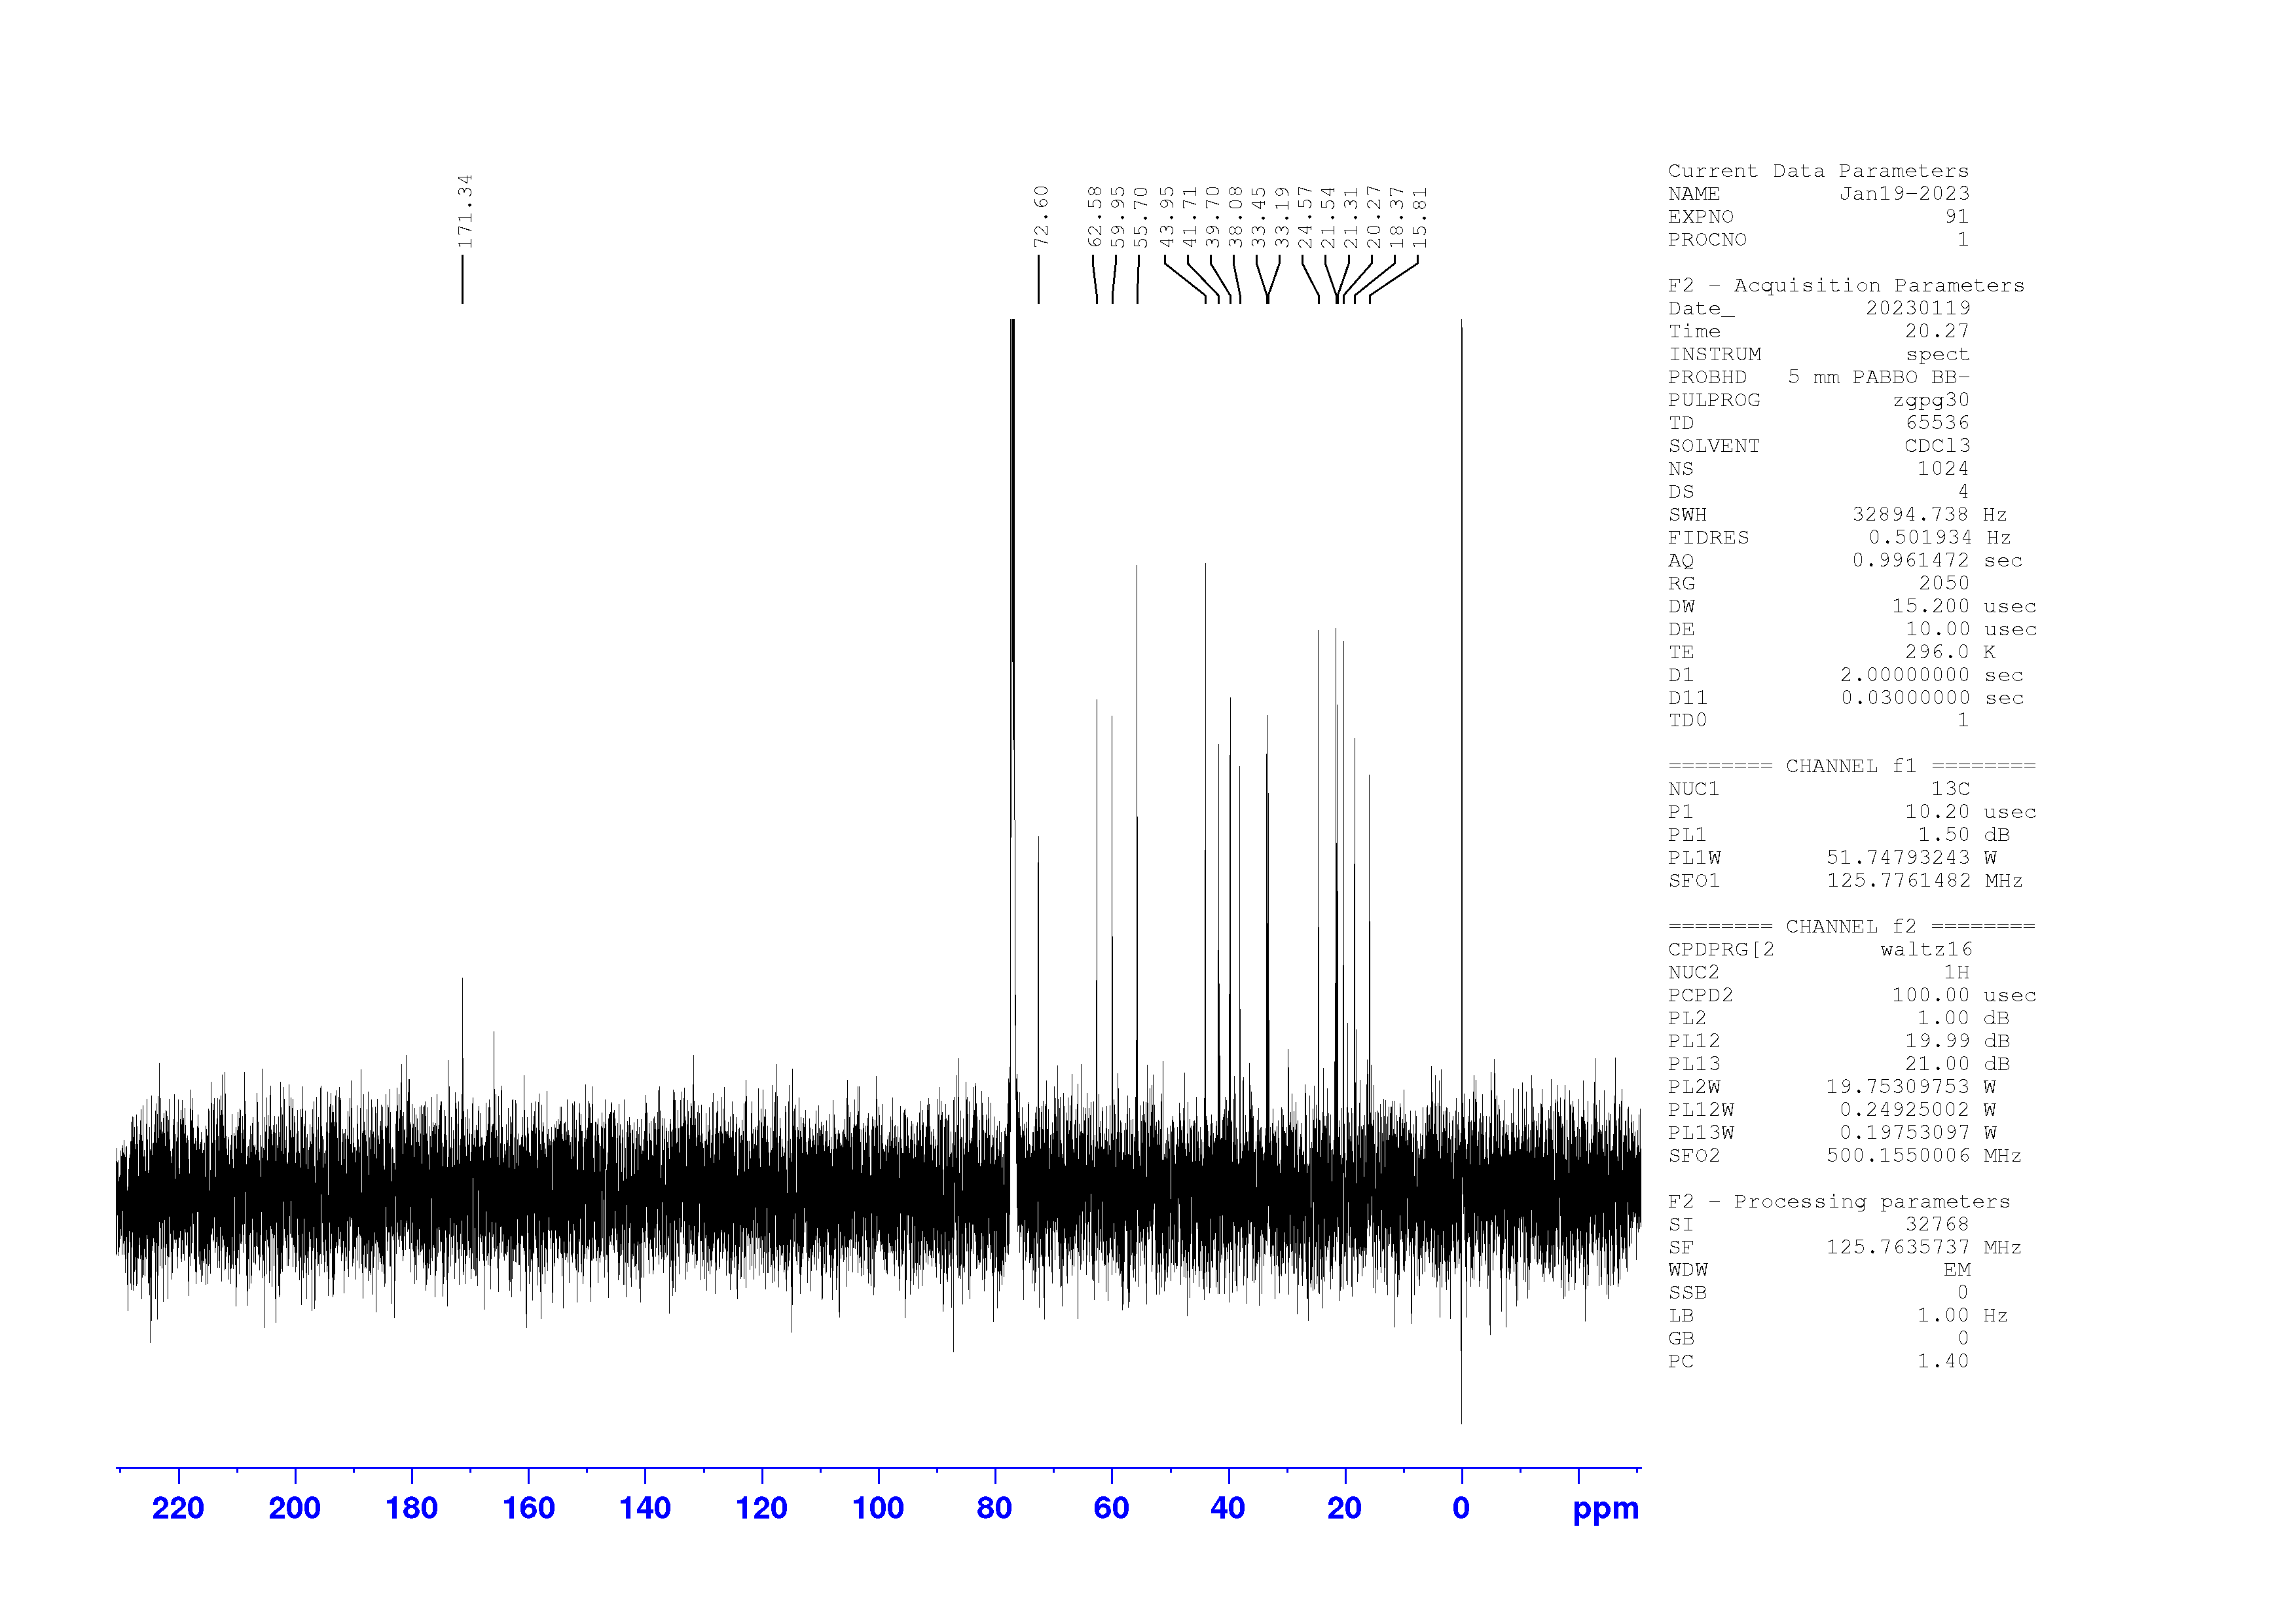


**1H of dehydroxy-pyripyropene (28)**


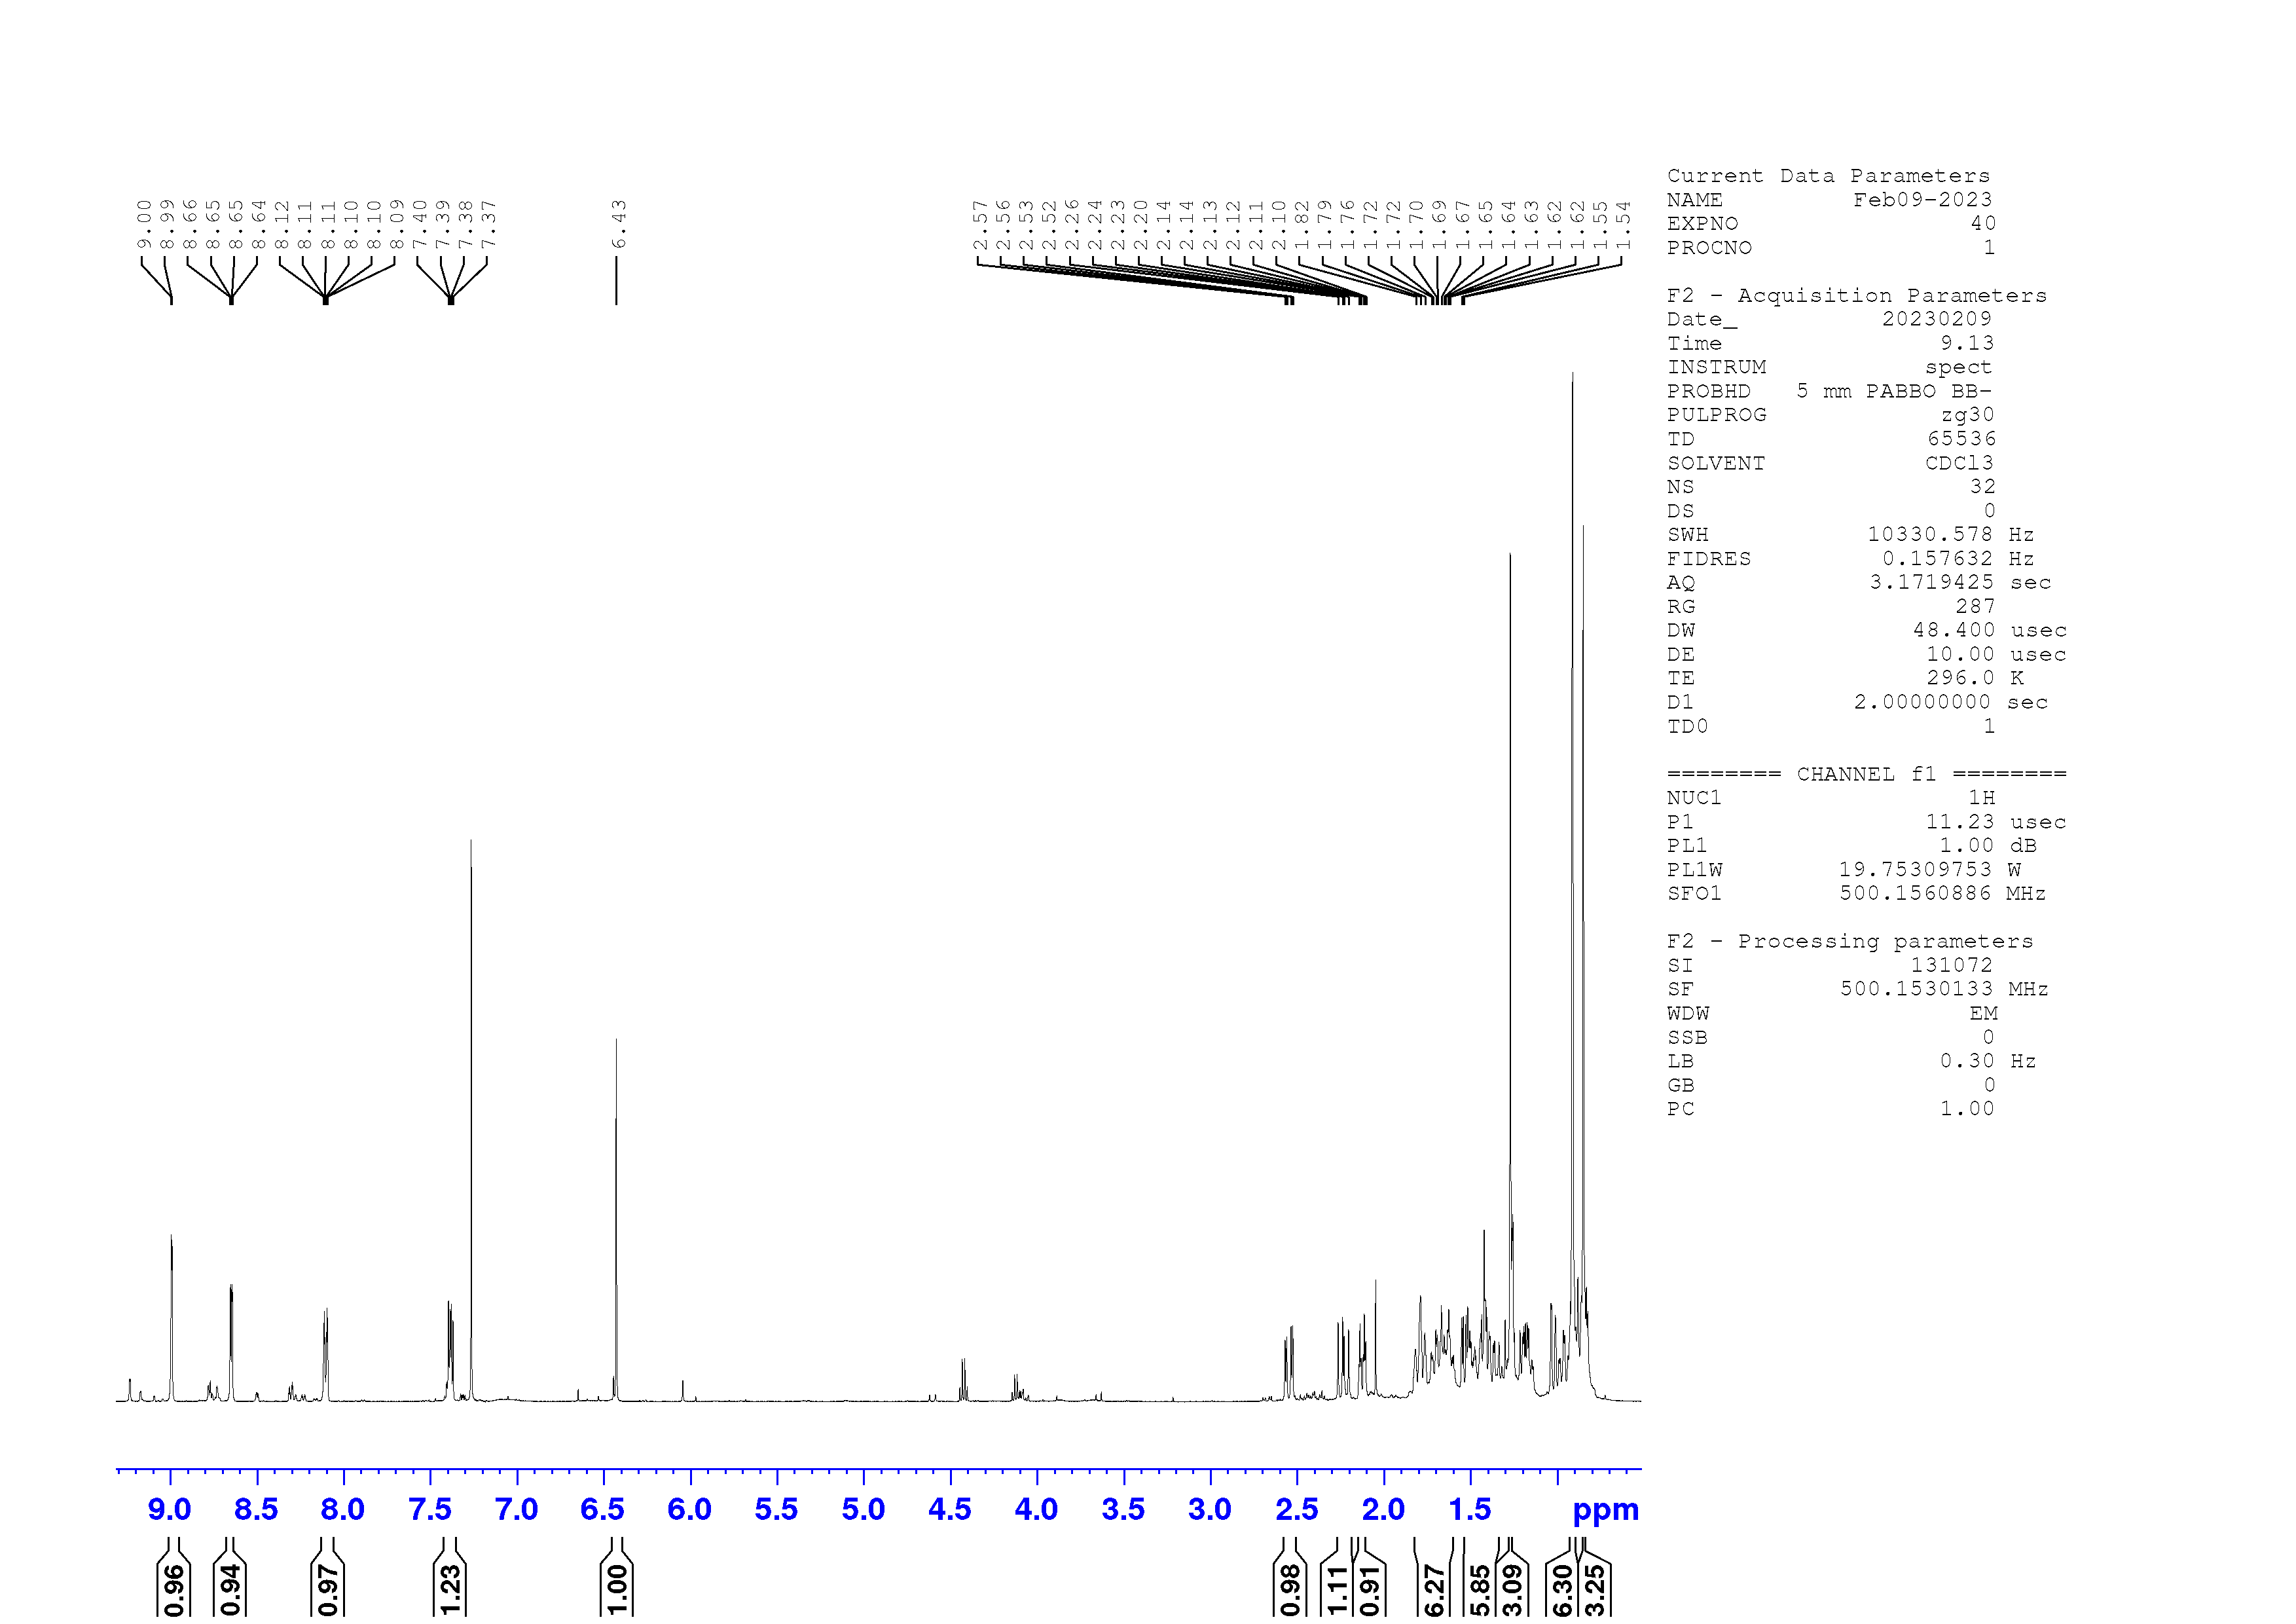


**13C of dehydroxy-pyripyropene (28)**


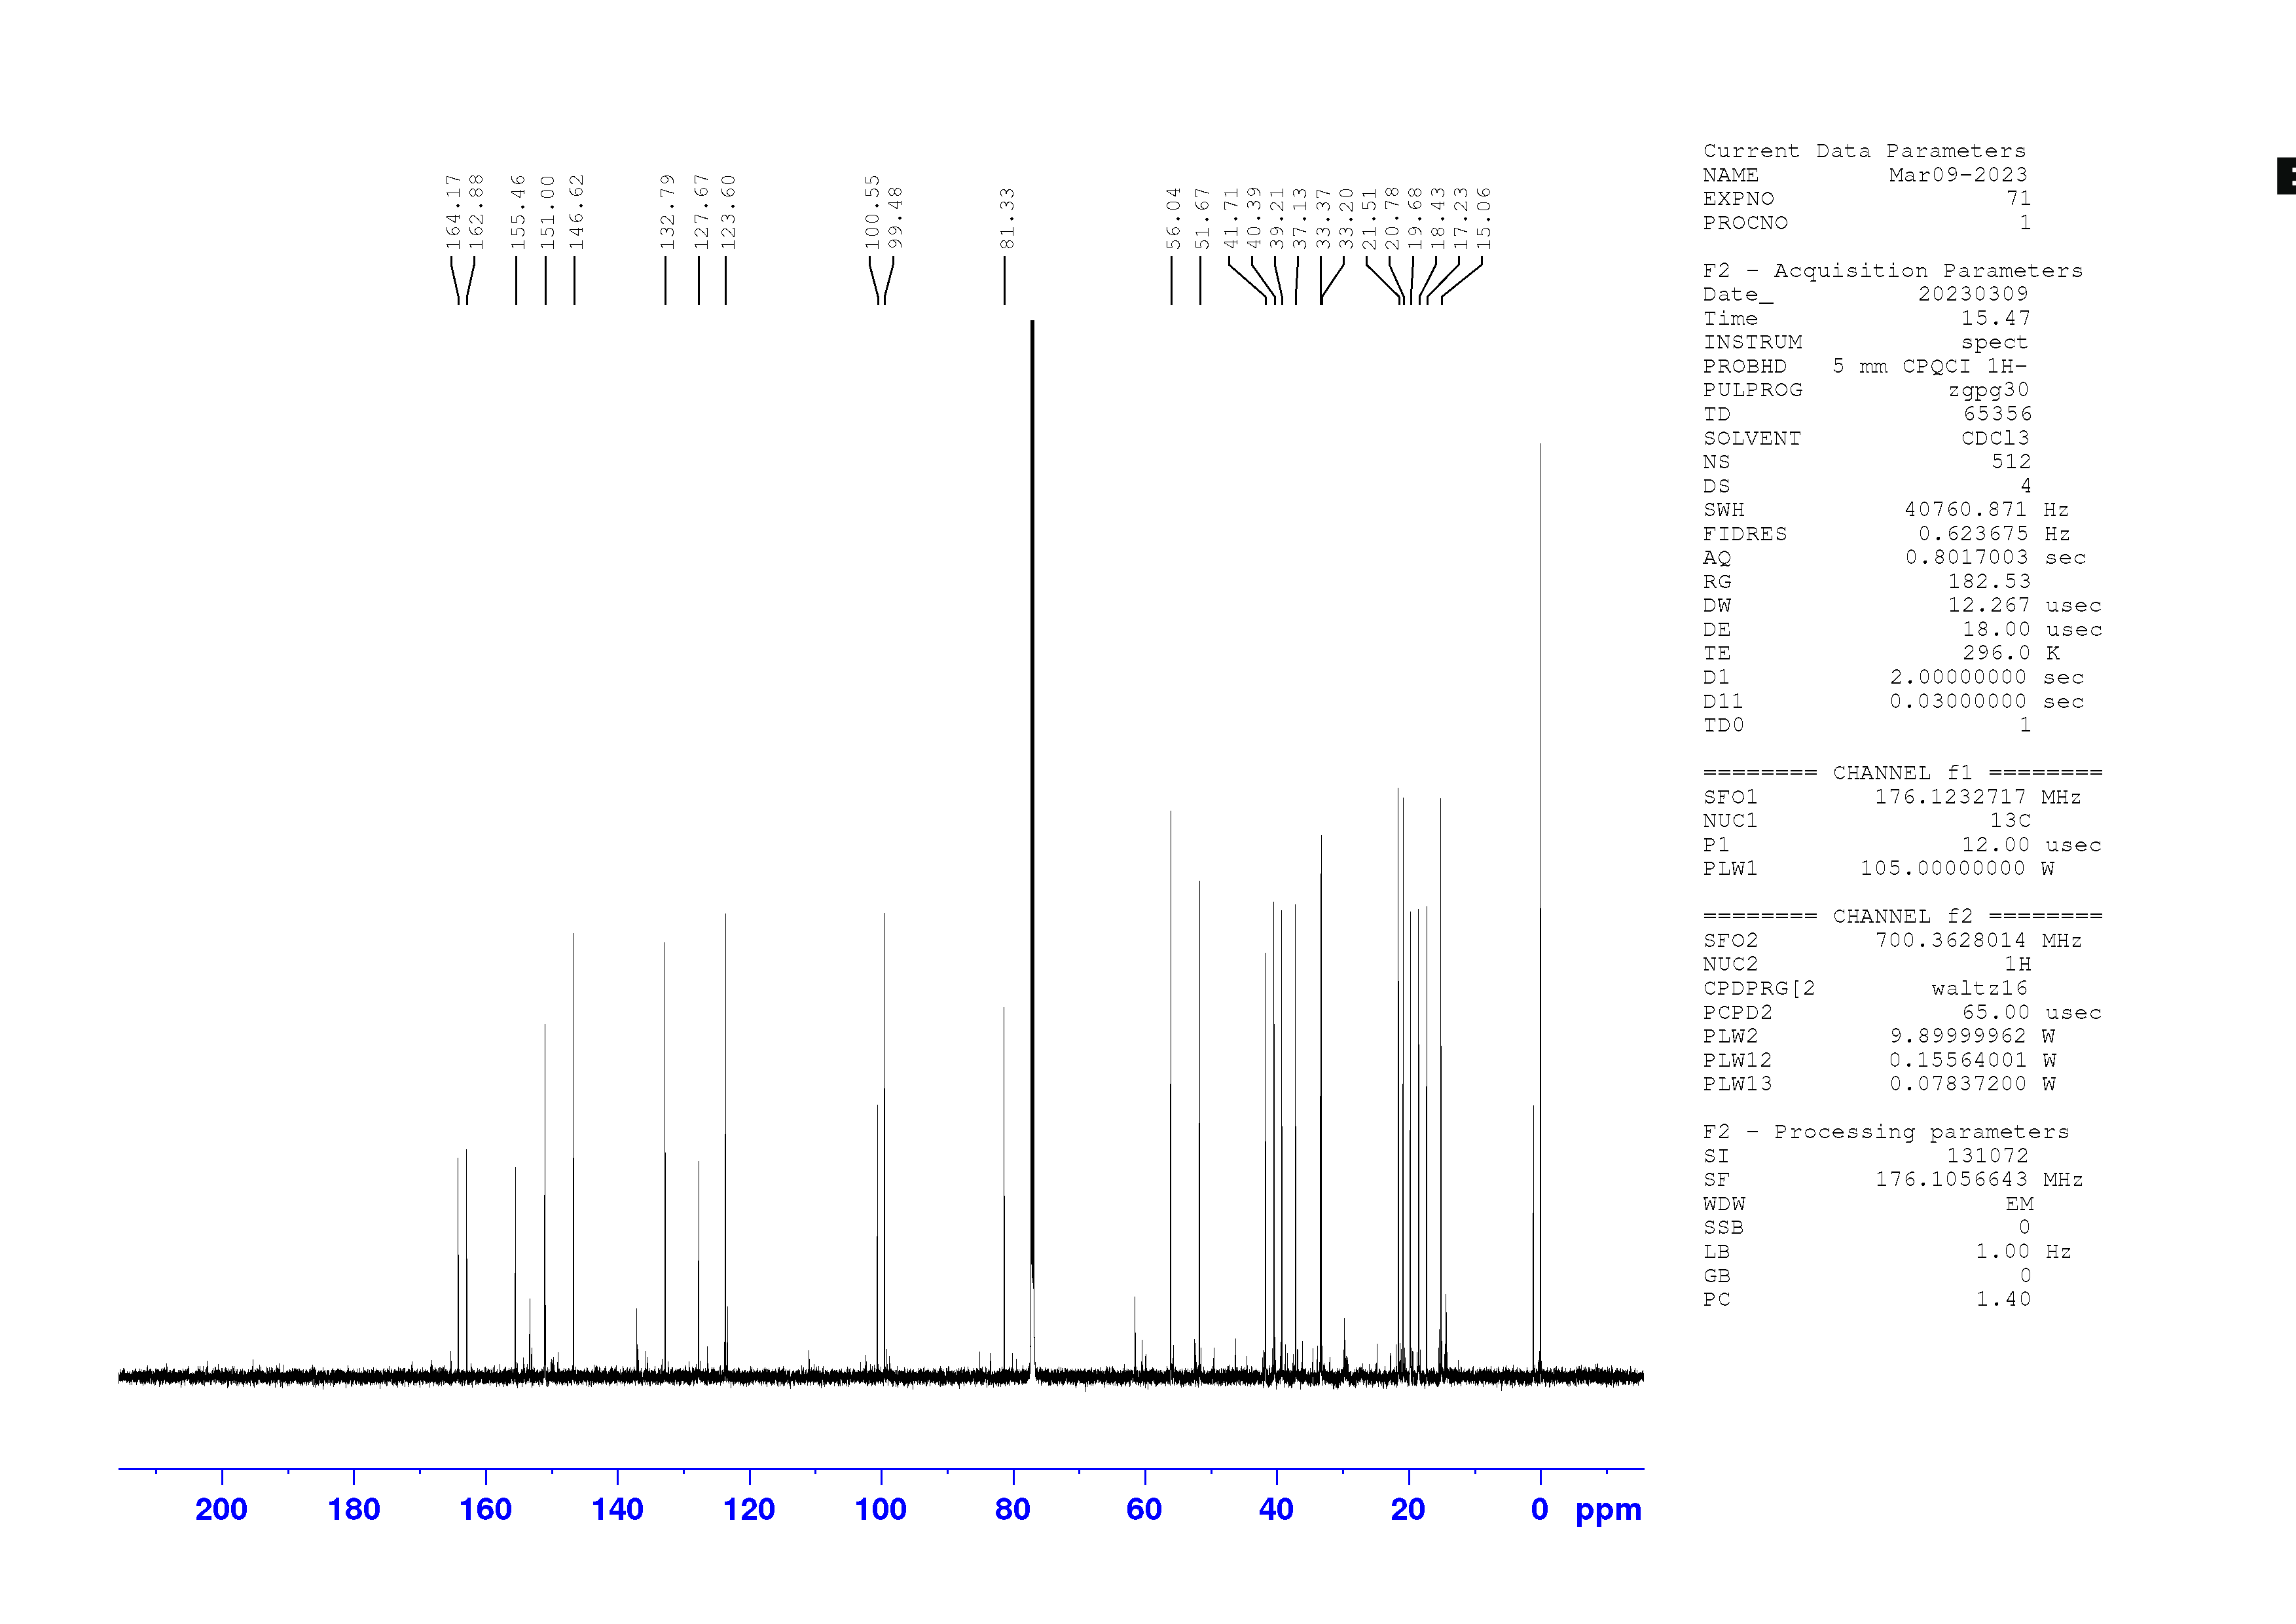


**1H of dihydroxy-phenylpyropene (29) with equimolar mesitylene standard**


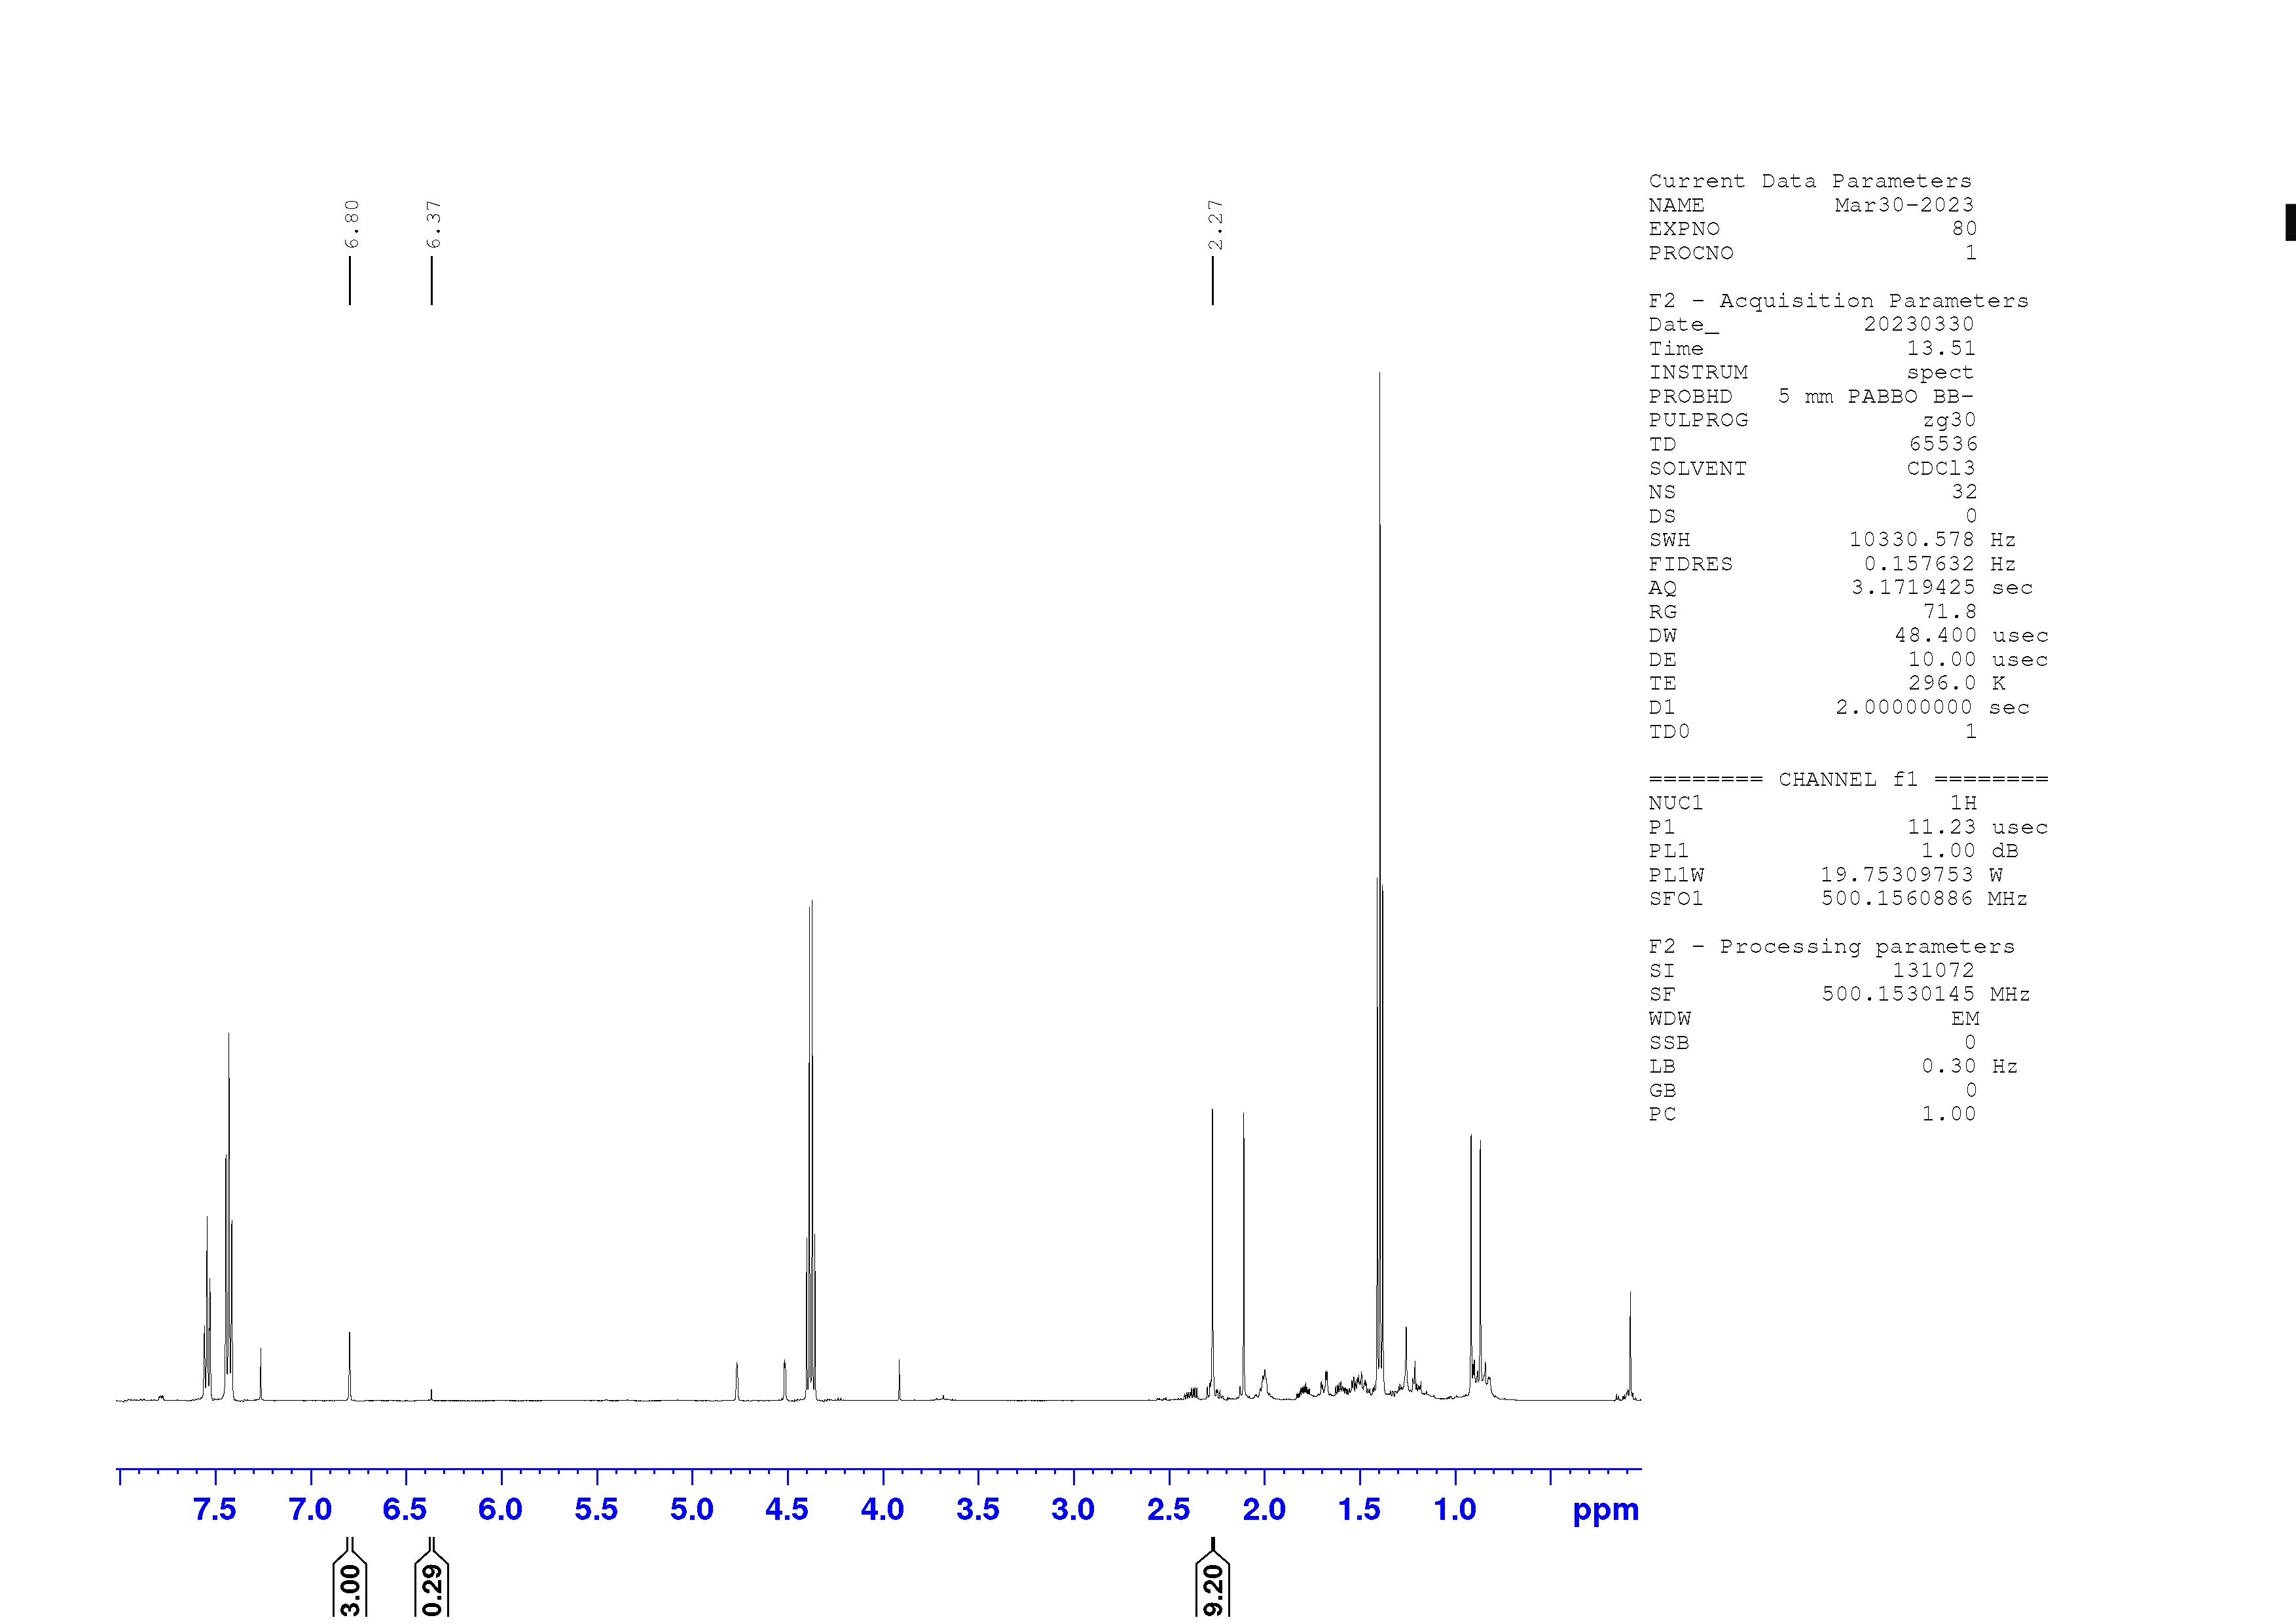


**NOESY of *S,R,S,S*-drimenol hydrate 9**


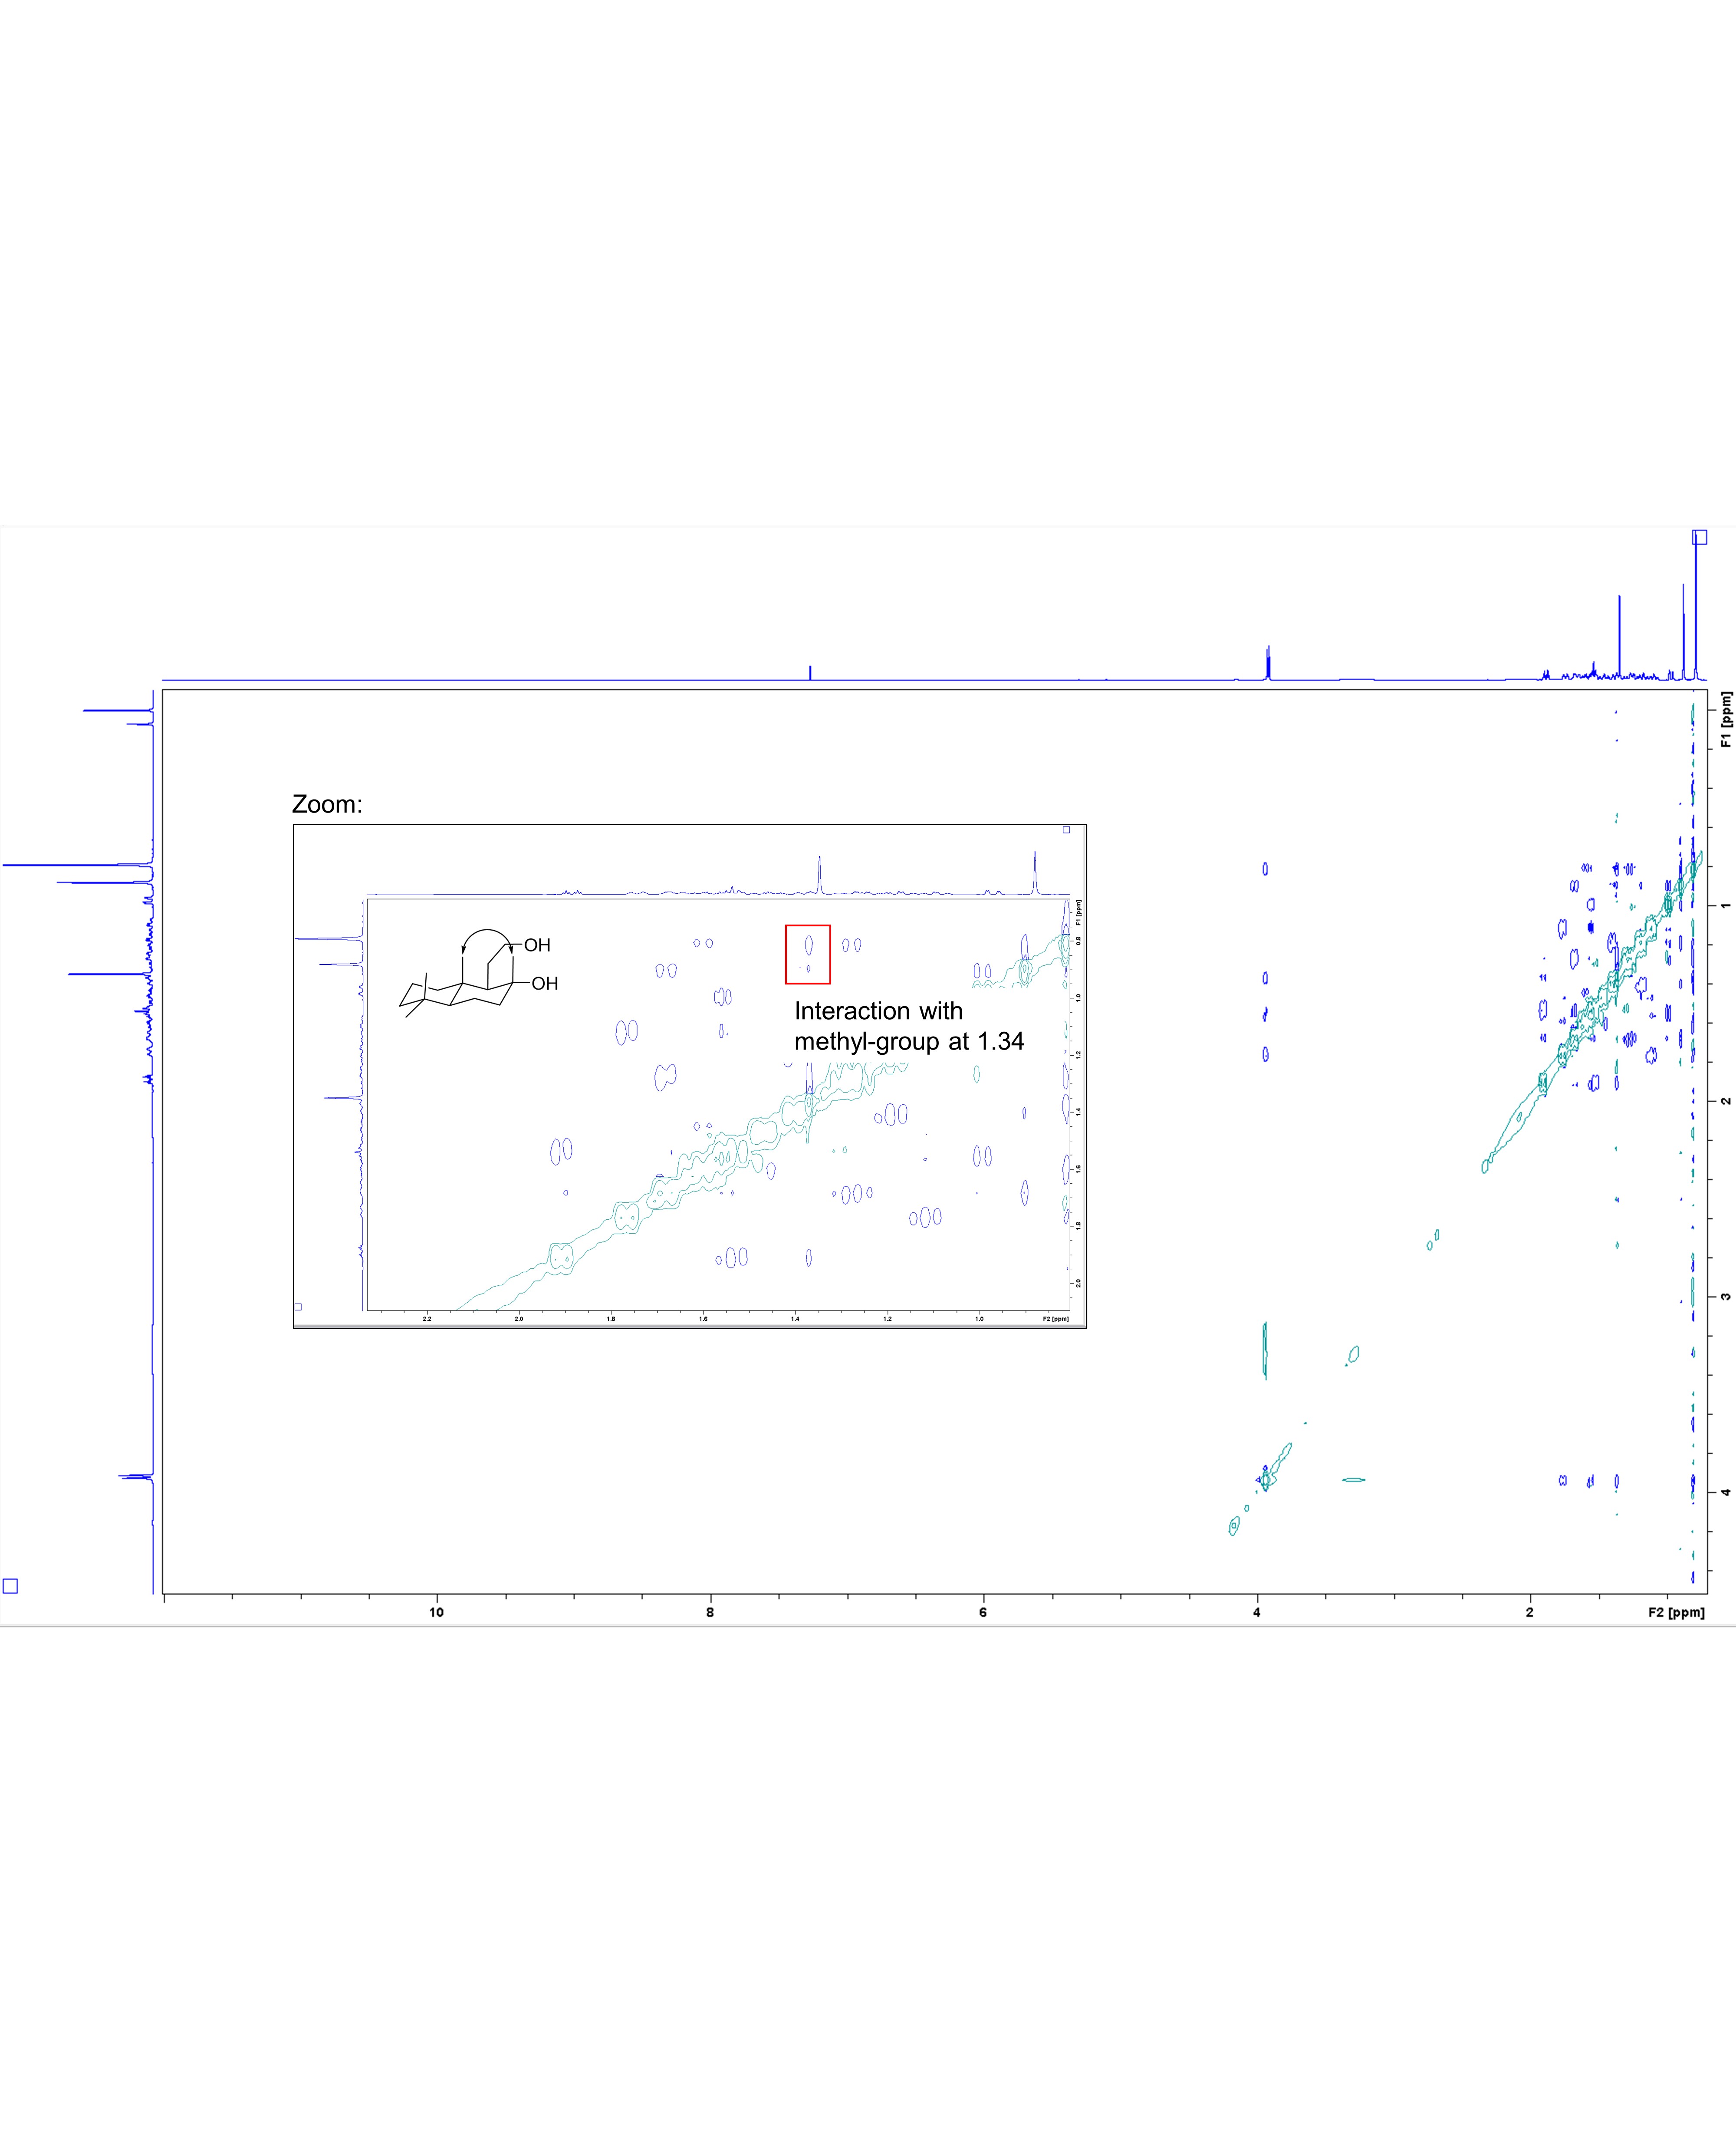


**NOESY of *S,S,S,S*-drimenol hydrate S1-9**


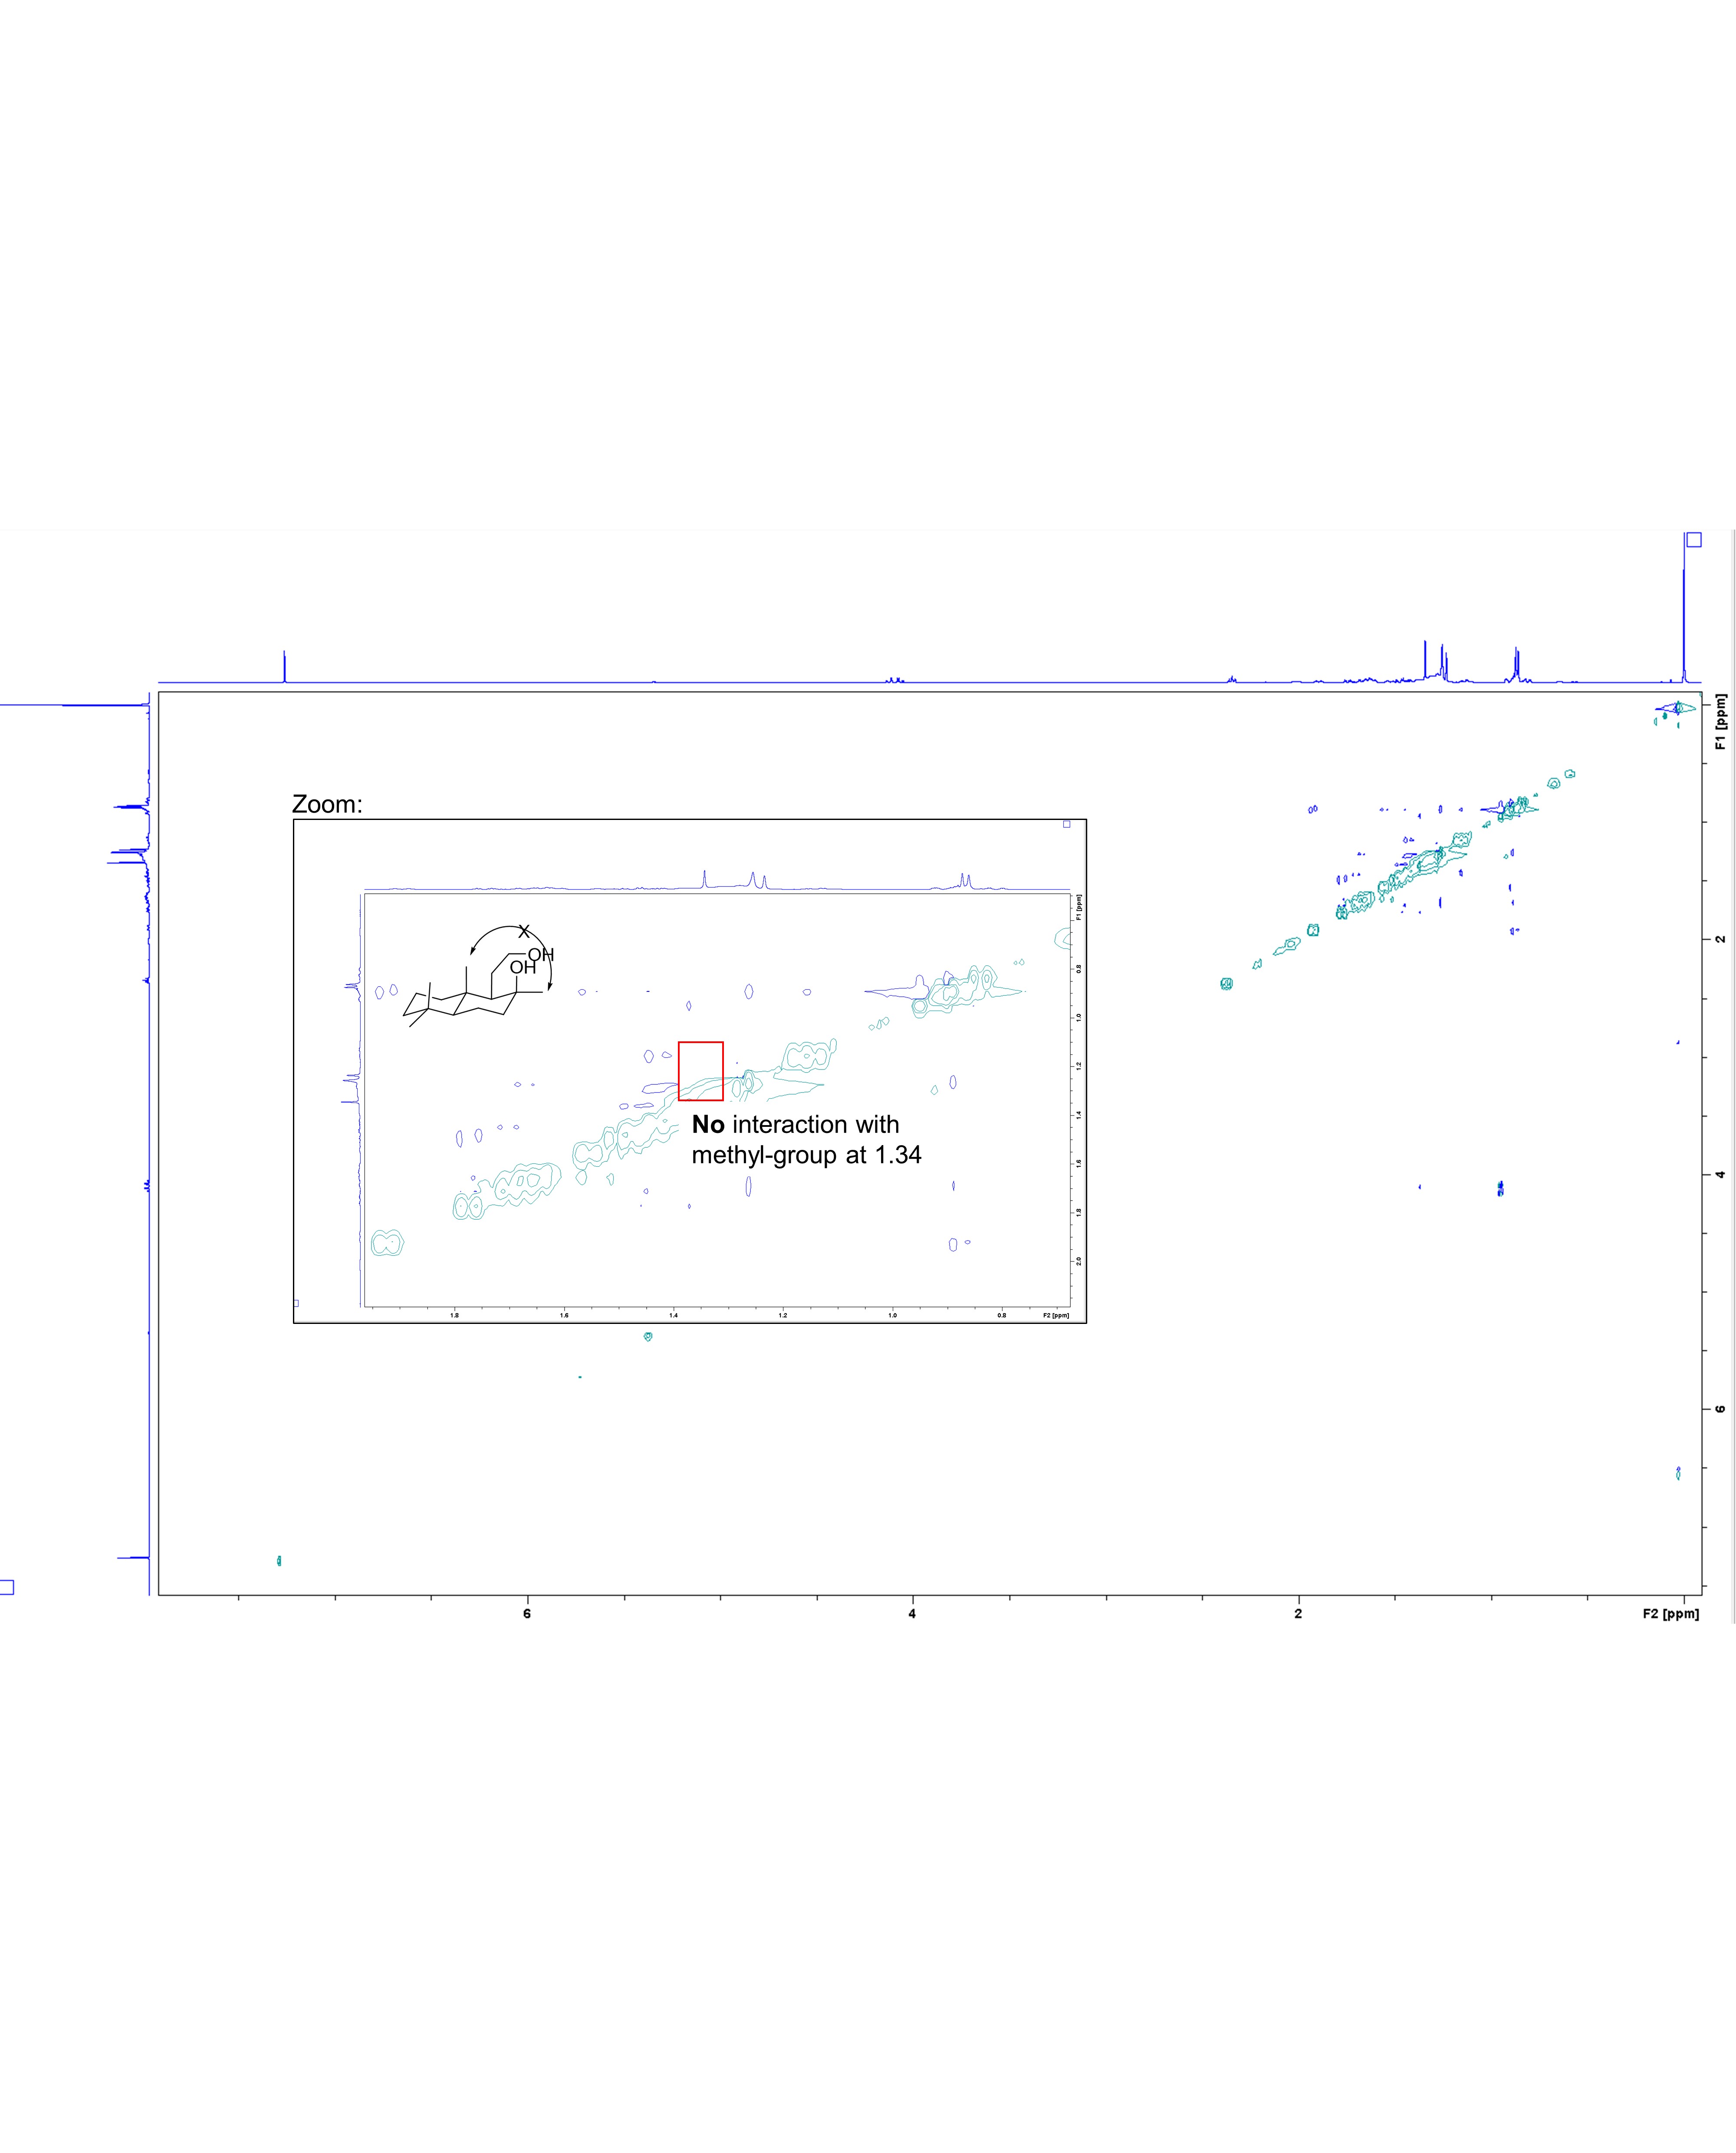


**NOESY of P-2**


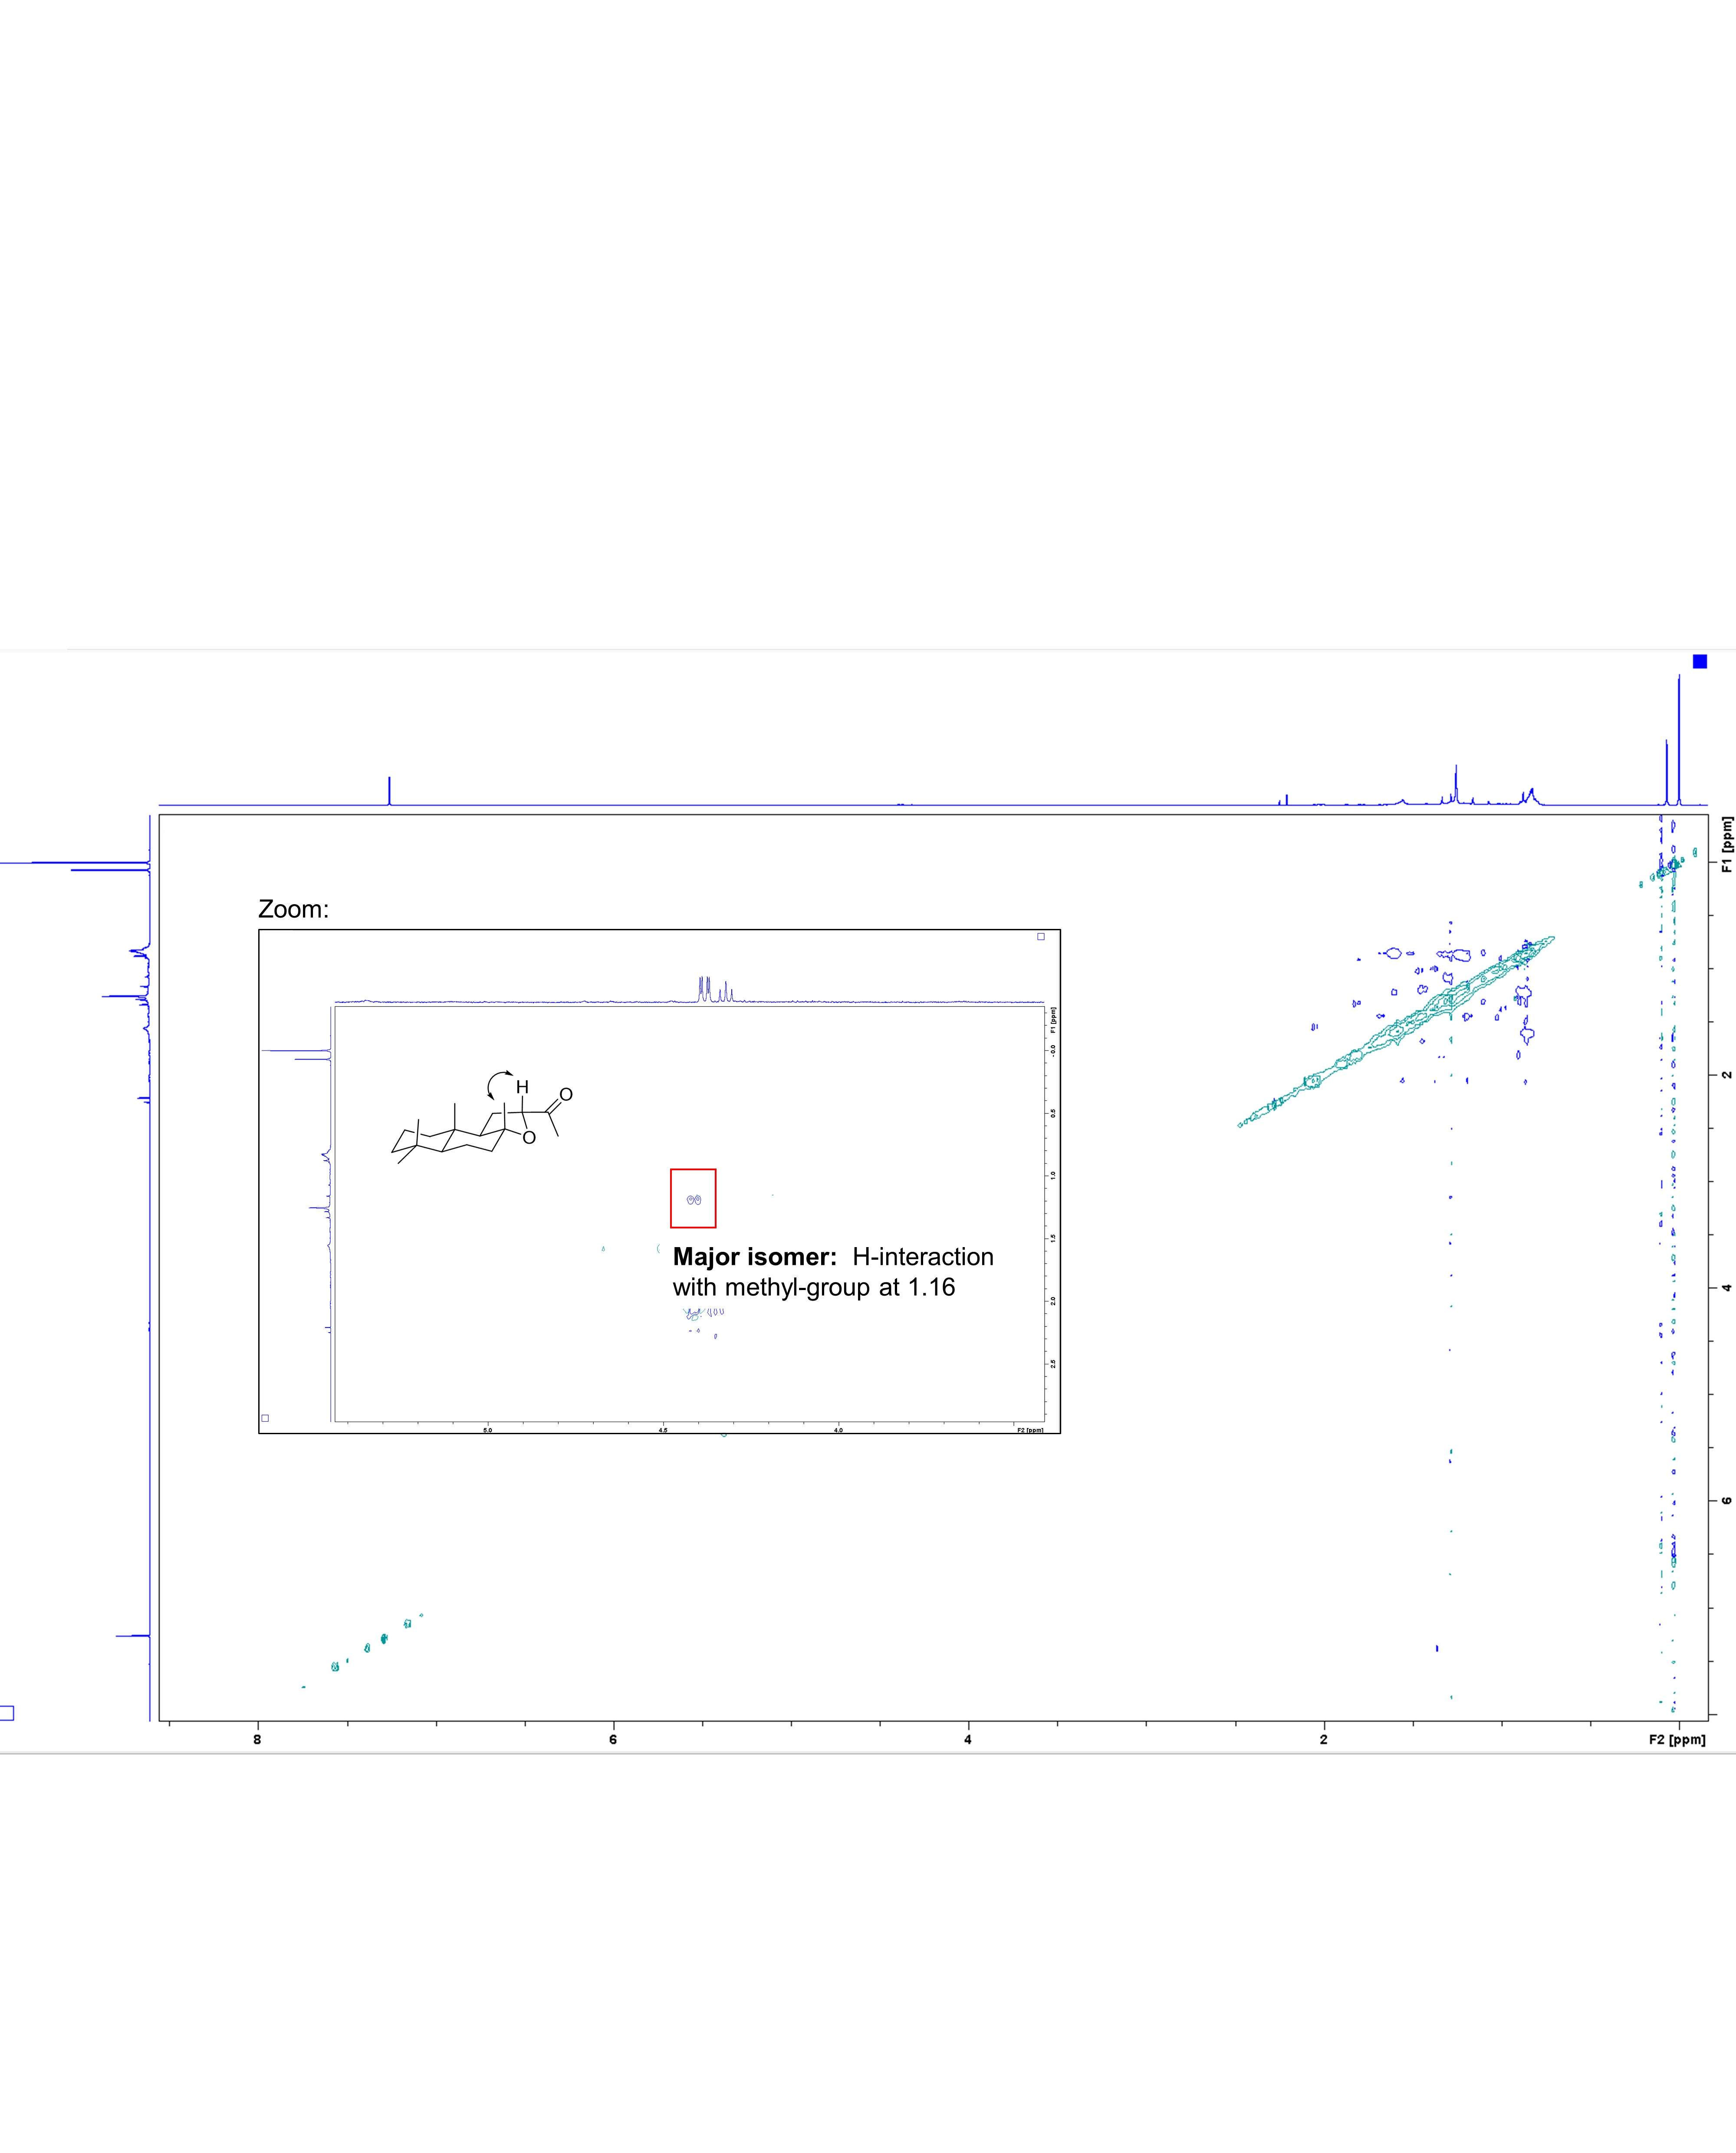


# Amino acid sequences

*Aac*SHC

MAEQLVEAPAYARTLDRAVEYLLSCQKDEGYWWGPLLSNVTMEAEYVLLCHILDRVDRDRMEKIRRYLLHEQREDGTWALYPGGPPDLDTTIEAYVALKYIGMSRDEEPMQKALRFIQSQGGIESSRVFTRMWLALVGEYPWEKVPMVPPEIMFLGKRMPLNIYEFGSWARATVVAISIVMSRQPVFPLPERARVPELYDTDVPPRRRGAKGGGGRIFDALDRALHGYQKLSVHPFRRAAEIRALDWLLERQAGDGSWGGIQPPWFYTLIALKILDMTQHPAFIKGWEGLELYGVDLDYGGWMFQASISPVWDTGLAVLALRAAGLPADHDRLVKAGEWLLDRQITVPGDWAVKRPNLKPGGFAFQFDNVYYPDVDDTAVVVWALNSLRLPDERRRRDVMTKGFRWIVGMQSSNGGWGAYDVDNTSDLPNHIPFCDFGEVTDPPSEDVTAHVLECFGSFGYDDAWKVIRRAVEYLKREQRPDGSWFGRWGVNYLYGTGAVVPALKAVGIDVREPFIQKALDWVEQHQNPDGGWGEDCRSYEDPAYAGKGASTPSQTAWALMALIAGGRAESDSVRRGVQYLVETQRPDGGWDEPYYTGTGFPGDFYLGYTMYRHVFPTLALGRYKQAIERR

*Tel*SHC

MPTSLATAIDPKQLQQAIRASQDFLFSQQYAEGYWWAELESNVTMTAEVILLHKIWGTEQRLPLAKAEQYLRNHQRDHGGWELFYGDGGDLSTSVEAYMGLRLLGVPETDPALVKARQFILARGGISKTRIFTKLHLALIGCYDWRGIPSLPPWIMLLPEGSPFTIYEMSSWARSSTVPLLIVMDRKPVYGMDPPITLDELYSEGRANVVWELPRQGDWRDVFIGLDRVFKLFETLNIHPLREQGLKAAEEWVLERQEASGDWGGIIPAMLNSLLALRALDYAVDDPIVQRGMAAVDRFAIETETEYRVQPCVSPVWDTALVMRAMVDSGVAPDHPALVKAGEWLLSKQILDYGDWHIKNKKGRPGGWAFEFENRFYPDVDDTAVVVMALHAVTLPNENLKRRAIERAVAWIASMQCRPGGWAAFDVDNDQDWLNGIPYGDLKAMIDPNTADVTARVLEMVGRCQLAFDRVALDRALAYLRNEQEPEGCWFGRWGVNYLYGTSGVLTALSLVAPRYDRWRIRRAAEWLMQCQNADGGWGETCWSYHDPSLKGKGDSTASQTAWAIIGLLAAGDATGDYATEAIERGIAYLLETQRPDGTWHEDYFTGTGFPCHFYLKYHYYQQHFPLTALGRYARWRNLLAT

# References

1. Li, J., Li, F., King-Smith, E. & Renata, H. Merging chemoenzymatic and radical-based retrosynthetic logic for rapid and modular synthesis of oxidized meroterpenoids. *Nat. Chem.* **12**, 173–179 (2020).

2. Basabe, P. *et al.* Synthesis of (+)-makassaric acid, a protein kinase MK2 inhibitor. *Tetrahedron* **66**, 6008–6012 (2010).

3. Dethe, D. H., Murhade, G. M., Dherange, B. D. & Sau, S. K. Enantiospecific Syntheses of Hongoquercins A and B and Chromazonarol. *European J. Org. Chem.* **2017**, 1143–1150 (2017).

4. Yonemura, Y., Ohyama, T. & Hoshino, T. Chemo-enzymatic syntheses of drimane-type sesquiterpenes and the fundamental core of hongoquercin meroterpenoid by recombinant squalene-hopene cyclase. *Org. Biomol. Chem.* **10**, 440–446 (2012).

5. Land, H. & Humble, M. S. YASARA: A tool to obtain structural guidance in biocatalytic investigations. in *Methods in Molecular Biology* vol. 1685 43–67 (Humana Press Inc., 2018).

6. Baek, M. & Baker, D. Deep learning and protein structure modeling. *Nat. Methods* **19**, 13–14 (2022).

7. Schneider, A., Jegl, P. & Hauer, B. Stereoselective Directed Cationic Cascades Enabled by Molecular Anchoring in Terpene Cyclases. *Angew. Chem. Int. Ed.* **60**, 13251–13256 (2021).

8. Schulte, S., Potter, K., Lemke, C. & Peters, R. J. Catalytic bases and stereo-control in Lamiaceae class II diterpene cyclases. *Biochemistry* **57**, 3473–3479 (2018).

9. Chovancova, E. *et al.* CAVER 3.0: A Tool for the Analysis of Transport Pathways in Dynamic Protein Structures. *PLOS Comput. Biol.* **8**, e1002708 (2012).

10. Schneider, A., Curado, C., Lystbaek, T. B., Osuna, S. & Hauer, B. Harnessing the Structure and Dynamics of the Squalene-Hopene Cyclase for (-)-Ambroxide Production. *Angew. Chem. Int. Ed.* e202301607 (2023) doi:10.1002/ANIE.202301607.

11. Reetz, M. T., Soni, P., Fernández, L., Gumulya, Y. & Carballeira, J. D. Increasing the stability of an enzyme toward hostile organic solvents by directed evolution based on iterative saturation mutagenesis using the B-FIT method. *Chem. Commun.* **46**, 8657–8658 (2010).

12. Lye, G. J. & Woodley, J. M. Application of in situ product-removal techniques to biocatalytic processes. *Trends Biotechnol.* **17**, 395–402 (1999).

13. Wachtmeister, J. & Rother, D. Recent advances in whole cell biocatalysis techniques bridging from investigative to industrial scale. *Curr. Opin. Biotechnol.* **42**, 169–177 (2016).

14. Los, D. A., Mironov, K. S. & Allakhverdiev, S. I. Regulatory role of membrane fluidity in gene expression and physiological functions. *Photosynth. Res.* **116**, 489–509 (2013).

15. Moulines, J., Bats, J. P., Lamidey, A. M. & Da Silva, N. About a practical synthesis of Ambrox® from sclareol: A new preparation of a ketone key intermediate and a close look at its Baeyer-Villiger oxidation. *Helv. Chim. Acta* **87**, 2695–2705 (2004).

16. Vlad, P. F., Ungur, N. D., Van Hung, N. & Perutsky, V. B. Superacidic low-temperature cyclization of terpenols and their acetates. *Russ. Chem. Bull.* **44**, 2390–2403 (1995).

17. Kulchitski, V. N., Ungur, N. D. & Vlad, P. F. Electrophilic cyclization of α- and β-geranyl acetates by mercury(II) trifluoroacetate. *Russ. Chem. Bull.* **46**, 1264–1268 (1997).

18. Tsangarakis, C. & Stratakis, M. Biomimetic cyclization of small terpenoids promoted by zeolite NaY: Tandem formation of α-ambrinol from geranyl acetone. *Adv. Synth. Catal.* **347**, 1280–1284 (2005).

19. Ungur, N. D., Popa, N. P., Van Tuen, N. & Vlad, P. F. Cyclization of α-terpenols and their acetates by fluorosulfonic acid. *Chem. Nat. Compd.* **29**, 473–478 (1993).

20. Grin’ko, M., Kul’chitskii, V., Ungur, N. & Vlad, P. F. Superacid cyclization of certain aliphatic sesquiterpene derivatives in ionic liquids. *Chem. Nat. Compd.* **42**, 439–441 (2006).

21. Parker, K. A. & Resnick, L. The First Total Synthesis of a Pyripyropene-Type ACAT Inhibitor, (±)-GERI-BP00P. *J. Org. Chem* **60**, 5726–5728 (1995).

22. Kille, S. *et al.* Reducing codon redundancy and screening effort of combinatorial protein libraries created by saturation mutagenesis. *ACS Synth. Biol.* **2**, 83–92 (2013).

23. Gibson, D. G. *et al.* Enzymatic assembly of DNA molecules up to several hundred kilobases. *Nat. Methods* **6**, 343–345 (2009).

24. Renzette, N. Generation of transformation competent E. coli. *Curr. Protoc. Microbiol.* **22**, A.3L.1-A.3L.5 (2011).

25. Ren, X., Yu, D., Han, S. & Feng, Y. Thermolysis of recombinant *Escherichia coli* for recovering a thermostable enzyme. *Biochem. Eng. J.* **33**, 94–98 (2007).

26. Koschorreck, K., Wahrendorff, F., Biemann, S., Jesse, A. & Urlacher, V. B. Cell thermolysis – A simple and fast approach for isolation of bacterial laccases with potential to decolorize industrial dyes. *Process Biochem.* **56**, 171–176 (2017).

27. Pol-Fachin, L., Rusu, V. H., Verli, H. & Lins, R. D. GROMOS 53A6 GLYC, an improved GROMOS force field for hexopyranose-based carbohydrates. *J. Chem. Theory Comput.* **8**, 4681–4690 (2012).

28. Oostenbrink, C., Villa, A., Mark, A. E. & Van Gunsteren, W. F. A biomolecular force field based on the free enthalpy of hydration and solvation: The GROMOS force-field parameter sets 53A5 and 53A6. *J. Comput. Chem.* **25**, 1656–1676 (2004).

29. Poger, D., Van Gunsteren, W. F. & Mark, A. E. A new force field for simulating phosphatidylcholine bilayers. *J. Comput. Chem.* **31**, 1117–1125 (2010).

30. Schmid, N. *et al.* Definition and testing of the GROMOS force-field versions 54A7 and 54B7. *Eur. Biophys. J.* **40**, 843–856 (2011).

31. Reif, M. M., Hünenberger, P. H. & Oostenbrink, C. New interaction parameters for charged amino acid side chains in the GROMOS force field. *J. Chem. Theory Comput.* **8**, 3705–3723 (2012).

32. Lins, R. D. & Hünenberger, P. H. A new GROMOS force field for hexopyranose-based carbohydrates. *J. Comput. Chem.* **26**, 1400–1412 (2005).

33. Hansen, H. S. & Hünenberger, P. H. A reoptimized GROMOS force field for hexopyranose-based carbohydrates accounting for the relative free energies of ring conformers, anomers, epimers, hydroxymethyl rotamers, and glycosidic linkage conformers. *J. Comput. Chem.* **32**, 998–1032 (2011).

34. Malde, A. K. *et al.* An Automated force field Topology Builder (ATB) and repository: Version 1.0. *J. Chem. Theory Comput.* **7**, 4026–4037 (2011).

35. Berendsen, H. J. C., Postma, J. P. M., van Gunsteren, W. F. & Hermans, J. *Intermolecular Forces*. (1981).

36. MacCallum, J. L., Drew Bennett, W. F. & Peter Tieleman, D. Distribution of Amino Acids in a Lipid Bilayer from Computer Simulations. *Biophys. J.* **94**, 3393–3404 (2008).

37. Gebhardt, J., Kleist, C., Jakobtorweihen, S. & Hansen, N. Validation and Comparison of Force Fields for Native Cyclodextrins in Aqueous Solution. *J. Phys. Chem. B* **122**, 1608–1626 (2018).

38. Gebhardt, J. & Hansen, N. Calculation of binding affinities for linear alcohols to α-cyclodextrin by twin-system enveloping distribution sampling simulations. *Fluid Phase Equilib.* **422**, 1–17 (2016).

39. Markthaler, D., Gebhardt, J., Jakobtorweihen, S. & Hansen, N. Molecular Simulations of Thermodynamic Properties for the System α-Cyclodextrin/Alcohol in Aqueous Solution. *Chemie Ing. Tech.* **89**, 1306–1314 (2017).

40. Baz, J., Gebhardt, J., Kraus, H., Markthaler, D. & Hansen, N. Insights into Noncovalent Binding Obtained from Molecular Dynamics Simulations. *Chemie Ing. Tech.* **90**, 1864–1875 (2018).

41. Abraham, M. J. *et al.* GROMACS: High performance molecular simulations through multi-level parallelism from laptops to supercomputers. *SoftwareX* **1**–**2**, 19–25 (2015).

42. Tribello, G. A., Bonomi, M., Branduardi, D., Camilloni, C. & Bussi, G. PLUMED 2: New feathers for an old bird. *Comput. Phys. Commun.* **185**, 604–613 (2014).

43. Nosé, S. & Nosi~, S. A molecular dynamics method for simulations in the canonical ensemble. *http://dx.doi.org/10.1080/00268978400101201* **52**, 255–268 (2006).

44. Hoover, W. G. Canonical dynamics: Equilibrium phase-space distributions. *Phys. Rev. A* **31**, 1695 (1985).

45. Parrinello, M. & Rahman, A. Polymorphic transitions in single crystals: A new molecular dynamics method. *J. Appl. Phys.* **52**, 7182 (1998).

46. Páll, S. & Hess, B. A flexible algorithm for calculating pair interactions on SIMD architectures. *Comput. Phys. Commun.* **184**, 2641–2650 (2013).

47. Essmann, U. *et al.* A smooth particle mesh Ewald method. *J. Chem. Phys.* **103**, 8577 (1998).

48. Hess, B., Bekker, H., Berendsen, H. J. C. & Fraaije, J. G. E. M. LINCS: A Linear Constraint Solver for Molecular Simulations. *J Comput Chem* **18**, 14631472 (1997).

49. Deng, Y. & Roux, B. Computations of standard binding free energies with molecular dynamics simulations. *J. Phys. Chem. B* **113**, 2234–2246 (2009).

50. Hermans, J. & Wang, L. Inclusion of Loss of Translational and Rotational Freedom in Theoretical Estimates of Free Energies of Binding. Application to a Complex of Benzene and Mutant T4 Lysozyme. (1997) doi:10.1021/JA963568.

51. Sugita, Y., Kitao, A. & Okamoto, Y. Multidimensional replica-exchange method for free-energy calculations. *J. Chem. Phys.* **113**, 6042 (2000).

52. Bussi, G. Hamiltonian replica exchange in GROMACS: a flexible implementation. *https://doi.org/10.1080/00268976.2013.824126* **112**, 379–384 (2013).

53. Shirts, M. R. & Chodera, J. D. Statistically optimal analysis of samples from multiple equilibrium states. *J. Chem. Phys.* **129**, 124105 (2008).

54. Klimovich, P. V., Shirts, M. R. & Mobley, D. L. Guidelines for the analysis of free energy calculations. *J. Comput. Aided. Mol. Des.* **29**, 397–411 (2015).

55. Markthaler, D., Jakobtorweihen, S. & Hansen, N. Lessons Learned from the Calculation of One-Dimensional Potentials of Mean Force [Article v1.0]. *Living J. Comput. Mol. Sci.* **1**, 11073–11073 (2019).

56. Reinert, D. J., Balliano, G. & Schulz, G. E. Conversion of Squalene to the Pentacarbocyclic Hopene. *Chem. Biol.* **11**, 121–126 (2004).

57. Seitz, M. *et al.* Synthesis of Heterocyclic Terpenoids by Promiscuous Squalene-Hopene Cyclases. *ChemBioChem* **14**, 436–439 (2013).

58. Bolster, M. G., Jansen, B. J. M. & De Groot, A. The synthesis of (-)-Ambrox® starting from labdanolic acid. *Tetrahedron* **57**, 5657–5662 (2001).

59. Serra, S. An expedient preparation of enantio-enriched ambergris odorants starting from commercial ionone alpha. *Flavour Fragr. J.* **28**, 46–52 (2013).

60. Kulciţki, V., Ungur, N., Gavagnin, M., Carbone, M. & Cimino, G. Further Synthetic Studies Towards the Austrodorane Skeleton: Synthesis of Austrodoral. *European J. Org. Chem.* **2005**, 1816–1822 (2005).

61. Tanimoto, H. & Oritani, T. Practical synthesis of Ambrox® from farnesyl acetate involving lipase catalyzed resolution. *Tetrahedron: Asymmetry* **7**, 1695–1704 (1996).

62. Urban, S. & Capon, R. J. Absolute stereochemistry of puupehenone and related metabolites. *J. Nat. Prod.* **59**, 900–901 (1996).

63. Novaes, L. F. T., Gonçalves, K. D. A., Trivella, D. B. B. & Pastre, J. C. Formal Total Synthesis of Actinoranone: Synthesis Approaches and Cytotoxic Studies. *J. Org. Chem.* **83**, 5160–5176 (2018).

64. Hoshino, T., Kumai, Y., Kudo, I., Nakano, S. I. & Ohashi, S. Enzymatic cyclization reactions of geraniol, farnesol and geranylgeraniol, and those of truncated squalene analogs having C20 and C25 by recombinant squalene cyclase. *Org. Biomol. Chem.* **2**, 2650–2657 (2004).

65. Basabe, P. *et al.* Synthesis of three marine natural sesterterpenolides from methyl isoanticopalate. First enantioselective synthesis of luffolide. *J. Org. Chem.* **70**, 9480–9485 (2005).

66. Imamura, P. M. & Santiago, G. M. P. Chlorosulfonic acid mediated cyclization of homoterpenic acid. *Synth. Commun.* **27**, 2479–2485 (1997).

67. Shulcts, E. E., Mironov, M. E., Kharitonov, Y. V & Vorozhtsov, N. N. FURANODITERPENOIDS OF THE LABDANE SERIES: OCCURRENCE IN PLANTS, TOTAL SYNTHESIS, SEVERAL TRANSFORMATIONS, AND BIOLOGICAL ACTIVITY. *Chem. Nat. Compd.* **50**, 5–22 (2014).
